# Supplementary material for: Dysidaminones A–M, cytotoxic and NF-κB inhibitory sesquiterpene aminoquinones from the South China Sea sponge Dysidea fragilis
Source: Royal Society of Chemistry journal article supplement (doi:10.1039/c3ra47265e), 2014-01-01
Supplement: c3ra47265e.pdf [file c3ra47265e.pdf]

## Electronic Supplementary Information

**Dysidaminones A–M, Cytotoxic and NF- $\kappa$ B Inhibitory Sesquiterpene**

**Aminoquinones from the South China Sea Sponge *Dysidea fragilis***

Wei-Hua Jiao, Ting-Ting Xu, Hao-Bing Yu, Feng-Rong Mu, Jia Li, Yu-Shan Li, Fan  
Yang, Bing-Nan Han, and Hou-Wen Lin\*

## Contents

- Figure S1.**  $^1\text{H}$  NMR Spectrum of Dysidaminone A (**1**) in  $\text{CDCl}_3$ .
- Figure S2.**  $^{13}\text{C}$  NMR Spectrum of Dysidaminone A (**1**) in  $\text{CDCl}_3$ .
- Figure S3.** DEPT135 Spectrum of Dysidaminone A (**1**) in  $\text{CDCl}_3$ .
- Figure S4.**  $^1\text{H}$ - $^1\text{H}$  COSY Spectrum of Dysidaminone A (**1**) in  $\text{CDCl}_3$ .
- Figure S5.** HSQC Spectrum of Dysidaminone A (**1**) in  $\text{CDCl}_3$ .
- Figure S6.** HMBC Spectrum of Dysidaminone A (**1**) in  $\text{CDCl}_3$ .
- Figure S7.** NOESY Spectrum of Dysidaminone A (**1**) in  $\text{CDCl}_3$ .
- Figure S8.** HRESIMS of Dysidaminone A (**1**).
- Figure S9.** CD Spectrum of Dysidaminone A (**1**) in MeOH.
- Figure S10.** UV Spectrum of Dysidaminone A (**1**) in MeOH.
- Figure S11.** IR Spectrum of Dysidaminone A (**1**).
- Figure S12.**  $^1\text{H}$  NMR Spectrum of Dysidaminone B (**2**) in  $\text{CDCl}_3$ .
- Figure S13.**  $^{13}\text{C}$  NMR Spectrum of Dysidaminone B (**2**) in  $\text{CDCl}_3$ .
- Figure S14.** DEPT135 Spectrum of Dysidaminone B (**2**) in  $\text{CDCl}_3$ .
- Figure S15.**  $^1\text{H}$ - $^1\text{H}$  COSY Spectrum of Dysidaminone B (**2**) in  $\text{CDCl}_3$ .
- Figure S16.** HSQC Spectrum of Dysidaminone B (**2**) in  $\text{CDCl}_3$ .
- Figure S17.** HMBC Spectrum of Dysidaminone B (**2**) in  $\text{CDCl}_3$ .
- Figure S18.** NOESY Spectrum of Dysidaminone B (**2**) in  $\text{CDCl}_3$ .
- Figure S19.** HRESIMS of Dysidaminone B (**2**).
- Figure S20.** CD Spectrum of Dysidaminone B (**2**) in MeOH.
- Figure S21.** UV Spectrum of Dysidaminone B (**2**) in MeOH.
- Figure S22.** IR Spectrum of Dysidaminone B (**2**).
- Figure S23.**  $^1\text{H}$  NMR Spectrum of Dysidaminone C (**3**) in  $\text{CDCl}_3$ .
- Figure S24.**  $^{13}\text{C}$  NMR Spectrum of Dysidaminone C (**3**) in  $\text{CDCl}_3$ .

**Figure S25.** DEPT135 Spectrum of Dysidaminone C (**3**) in CDCl<sub>3</sub>.

**Figure S26.** <sup>1</sup>H-<sup>1</sup>H COSY Spectrum of Dysidaminone C (**3**) in CDCl<sub>3</sub>.

**Figure S27.** HSQC Spectrum of Dysidaminone C (**3**) in CDCl<sub>3</sub>.

**Figure S28.** HMBC Spectrum of Dysidaminone C (**3**) in CDCl<sub>3</sub>.

**Figure S29.** NOESY Spectrum of Dysidaminone C (**3**) in CDCl<sub>3</sub>.

**Figure S30.** HRESIMS of Dysidaminone C (**3**).

**Figure S31.** CD Spectrum of Dysidaminone C (**3**) in MeOH.

**Figure S32.** UV Spectrum of Dysidaminone C (**3**) in MeOH.

**Figure S33.** IR Spectrum of Dysidaminone C (**3**).

**Figure S34.** <sup>1</sup>H NMR Spectrum of Dysidaminone D (**4**) in CDCl<sub>3</sub>.

**Figure S35.** <sup>13</sup>C NMR Spectrum of Dysidaminone D (**4**) in CDCl<sub>3</sub>.

**Figure S36.** DEPT135 Spectrum of Dysidaminone D (**4**) in CDCl<sub>3</sub>.

**Figure S37.** <sup>1</sup>H-<sup>1</sup>H COSY Spectrum of Dysidaminone D (**4**) in CDCl<sub>3</sub>.

**Figure S38.** HSQC Spectrum of Dysidaminone D (**4**) in CDCl<sub>3</sub>.

**Figure S39.** HMBC Spectrum of Dysidaminone D (**4**) in CDCl<sub>3</sub>.

**Figure S40.** NOESY Spectrum of Dysidaminone D (**4**) in CDCl<sub>3</sub>.

**Figure S41.** CD Spectrum of Dysidaminone D (**4**) in MeOH.

**Figure S42.** UV Spectrum of Dysidaminone D (**4**) in MeOH.

**Figure S43.** IR Spectrum of Dysidaminone D (**4**).

**Figure S44.** <sup>1</sup>H NMR Spectrum of Dysidaminone E (**5**) in CDCl<sub>3</sub>.

**Figure S45.** <sup>13</sup>C NMR Spectrum of Dysidaminone E (**5**) in CDCl<sub>3</sub>.

**Figure S46.** <sup>1</sup>H-<sup>1</sup>H COSY Spectrum of Dysidaminone E (**5**) in CDCl<sub>3</sub>.

**Figure S47.** HSQC Spectrum of Dysidaminone E (**5**) in CDCl<sub>3</sub>.

**Figure S48.** HMBC Spectrum of Dysidaminone E (**5**) in CDCl<sub>3</sub>.

**Figure S49.** NOESY Spectrum of Dysidaminone E (**5**) in CDCl<sub>3</sub>.

**Figure S50.** HRESIMS of Dysidaminone E (**5**).

**Figure S51.** CD Spectrum of Dysidaminone E (**5**) in MeOH.

**Figure S52.** UV Spectrum of Dysidaminone E (**5**) in MeOH.

**Figure S53.** IR Spectrum of Dysidaminone E (**5**).

**Figure S54.**  $^1\text{H}$  NMR Spectrum of Dysidaminone F (**6**) in  $\text{CDCl}_3$ .

**Figure S55.**  $^{13}\text{C}$  NMR Spectrum of Dysidaminone F (**6**) in  $\text{CDCl}_3$ .

**Figure S56.** DEPT135 Spectrum of Dysidaminone F (**6**) in  $\text{CDCl}_3$ .

**Figure S57.**  $^1\text{H}$ - $^1\text{H}$  COSY Spectrum of Dysidaminone F (**6**) in  $\text{CDCl}_3$ .

**Figure S58.** HSQC Spectrum of Dysidaminone F (**6**) in  $\text{CDCl}_3$ .

**Figure S59.** HMBC Spectrum of Dysidaminone F (**6**) in  $\text{CDCl}_3$ .

**Figure S60.** NOESY Spectrum of Dysidaminone F (**6**) in  $\text{CDCl}_3$ .

**Figure S61.** HRESIMS of Dysidaminone F (**6**).

**Figure S62.** CD Spectrum of Dysidaminone F (**6**) in MeOH.

**Figure S63.** UV Spectrum of Dysidaminone F (**6**) in MeOH.

**Figure S64.** IR Spectrum of Dysidaminone F (**6**).

**Figure S65.**  $^1\text{H}$  NMR Spectrum of Dysidaminone G (**7**) in  $\text{CDCl}_3$ .

**Figure S66.**  $^{13}\text{C}$  NMR Spectrum of Dysidaminone G (**7**) in  $\text{CDCl}_3$ .

**Figure S67.** DEPT135 Spectrum of Dysidaminone G (**7**) in  $\text{CDCl}_3$ .

**Figure S68.**  $^1\text{H}$ - $^1\text{H}$  COSY Spectrum of Dysidaminone G (**7**) in  $\text{CDCl}_3$ .

**Figure S69.** HSQC Spectrum of Dysidaminone G (**7**) in  $\text{CDCl}_3$ .

**Figure S70.** HMBC Spectrum of Dysidaminone G (**7**) in  $\text{CDCl}_3$ .

**Figure S71.** NOESY Spectrum of Dysidaminone G (**7**) in  $\text{CDCl}_3$ .

**Figure S72.** HRESIMS of Dysidaminone G (**7**).

**Figure S73.** CD Spectrum of Dysidaminone G (**7**) in MeOH.

**Figure S74.** UV Spectrum of Dysidaminone G (**7**) in MeOH.

**Figure S75.** IR Spectrum of Dysidaminone G (**7**).

**Figure S76.**  $^1\text{H}$  NMR Spectrum of Dysidaminone H (**8**) in  $\text{CDCl}_3$ .

**Figure S77.**  $^{13}\text{C}$  NMR Spectrum of Dysidaminone H (**8**) in  $\text{CDCl}_3$ .

**Figure S78.** DEPT135 Spectrum of Dysidaminone H (**8**) in  $\text{CDCl}_3$ .

**Figure S79.** HRESIMS of Dysidaminone H (**8**).

**Figure S80.** CD Spectrum of Dysidaminone H (**8**) in MeOH.

**Figure S81.** UV Spectrum of Dysidaminone H (**8**) in MeOH.

**Figure S82.** IR Spectrum of Dysidaminone H (**8**).

**Figure S83.**  $^1\text{H}$  NMR Spectrum of Dysidaminone I (**9**) in  $\text{CDCl}_3$ .

**Figure S84.**  $^{13}\text{C}$  NMR Spectrum of Dysidaminone I (**9**) in  $\text{CDCl}_3$ .

**Figure S85.** DEPT135 Spectrum of Dysidaminone I (**9**) in  $\text{CDCl}_3$ .

**Figure S86.**  $^1\text{H}$ - $^1\text{H}$  COSY Spectrum of Dysidaminone I (**9**) in  $\text{CDCl}_3$ .

**Figure S87.** HSQC Spectrum of Dysidaminone I (**9**) in  $\text{CDCl}_3$ .

**Figure S88.** HMBC Spectrum of Dysidaminone I (**9**) in  $\text{CDCl}_3$ .

**Figure S89.** NOESY Spectrum of Dysidaminone I (**9**) in  $\text{CDCl}_3$ .

**Figure S90.**  $^1\text{H}$  NMR Spectrum of Dysidaminone J (**10**) in  $\text{CDCl}_3$ .

**Figure S91.**  $^{13}\text{C}$  NMR Spectrum of Dysidaminone J (**10**) in  $\text{CDCl}_3$ .

**Figure S92.**  $^1\text{H}$ - $^1\text{H}$  COSY Spectrum of Dysidaminone J (**10**) in  $\text{CDCl}_3$ .

**Figure S93.** HRESIMS of Dysidaminone J (**10**).

**Figure S94.** CD Spectrum of Dysidaminone J (**10**) in MeOH.

**Figure S95.** UV Spectrum of Dysidaminone J (**10**) in MeOH.

**Figure S96.** IR Spectrum of Dysidaminone J (**10**).

**Figure S97.**  $^1\text{H}$  NMR Spectrum of Dysidaminone K (**11**) in  $\text{CDCl}_3$ .

**Figure S98.**  $^{13}\text{C}$  NMR Spectrum of Dysidaminone K (**11**) in  $\text{CDCl}_3$ .

**Figure S99.** DEPT135 Spectrum of Dysidaminone K (**11**) in  $\text{CDCl}_3$ .

**Figure S100.**  $^1\text{H}$ - $^1\text{H}$  COSY Spectrum of Dysidaminone K (**11**) in  $\text{CDCl}_3$ .

**Figure S101.** HSQC Spectrum of Dysidaminone K (**11**) in  $\text{CDCl}_3$ .

**Figure S102.** HMBC Spectrum of Dysidaminone K (**11**) in  $\text{CDCl}_3$ .

**Figure S103.** NOESY Spectrum of Dysidaminone K (**11**) in  $\text{CDCl}_3$ .

**Figure S104.** HRESIMS of Dysidaminone K (**11**).

**Figure S105.** CD Spectrum of Dysidaminone K (**11**) in MeOH.

**Figure S106.** UV Spectrum of Dysidaminone K (**11**) in MeOH.

**Figure S107.** IR Spectrum of Dysidaminone K (**11**).

**Figure S108.**  $^1\text{H}$  NMR Spectrum of Dysidaminone L (**12**) in  $\text{CDCl}_3$ .

**Figure S109.**  $^{13}\text{C}$  NMR Spectrum of Dysidaminone L (**12**) in  $\text{CDCl}_3$ .

**Figure S110.** DEPT135 Spectrum of Dysidaminone L (**12**) in  $\text{CDCl}_3$ .

**Figure S111.**  $^1\text{H}$ - $^1\text{H}$  COSY Spectrum of Dysidaminone L (**12**) in  $\text{CDCl}_3$ .

**Figure S112.** HSQC Spectrum of Dysidaminone L (**12**) in  $\text{CDCl}_3$ .

**Figure S113.** HMBC Spectrum of Dysidaminone L (**12**) in  $\text{CDCl}_3$ .

**Figure S114.** NOESY Spectrum of Dysidaminone L (**12**) in  $\text{CDCl}_3$ .

**Figure S115.** HRESIMS of Dysidaminone L (**12**).

**Figure S116.** CD Spectrum of Dysidaminone L (**12**) in MeOH.

**Figure S117.**  $^1\text{H}$  NMR Spectrum of Dysidaminone M (**13**) in  $\text{CDCl}_3$ .

**Figure S118.**  $^{13}\text{C}$  NMR Spectrum of Dysidaminone M (**13**) in  $\text{CDCl}_3$ .

**Figure S119.** DEPT135 Spectrum of Dysidaminone M (**13**) in  $\text{CDCl}_3$ .

**Figure S120.**  $^1\text{H}$ - $^1\text{H}$  COSY Spectrum of Dysidaminone M (**13**) in  $\text{CDCl}_3$ .

**Figure S121.** HSQC Spectrum of Dysidaminone M (**13**) in  $\text{CDCl}_3$ .

**Figure S122.** HMBC Spectrum of Dysidaminone M (**13**) in  $\text{CDCl}_3$ .

**Figure S123.** NOESY Spectrum of Dysidaminone M (**13**) in  $\text{CDCl}_3$ .

**Figure S124.** CD Spectrum of Dysidaminone M (**13**) in MeOH.

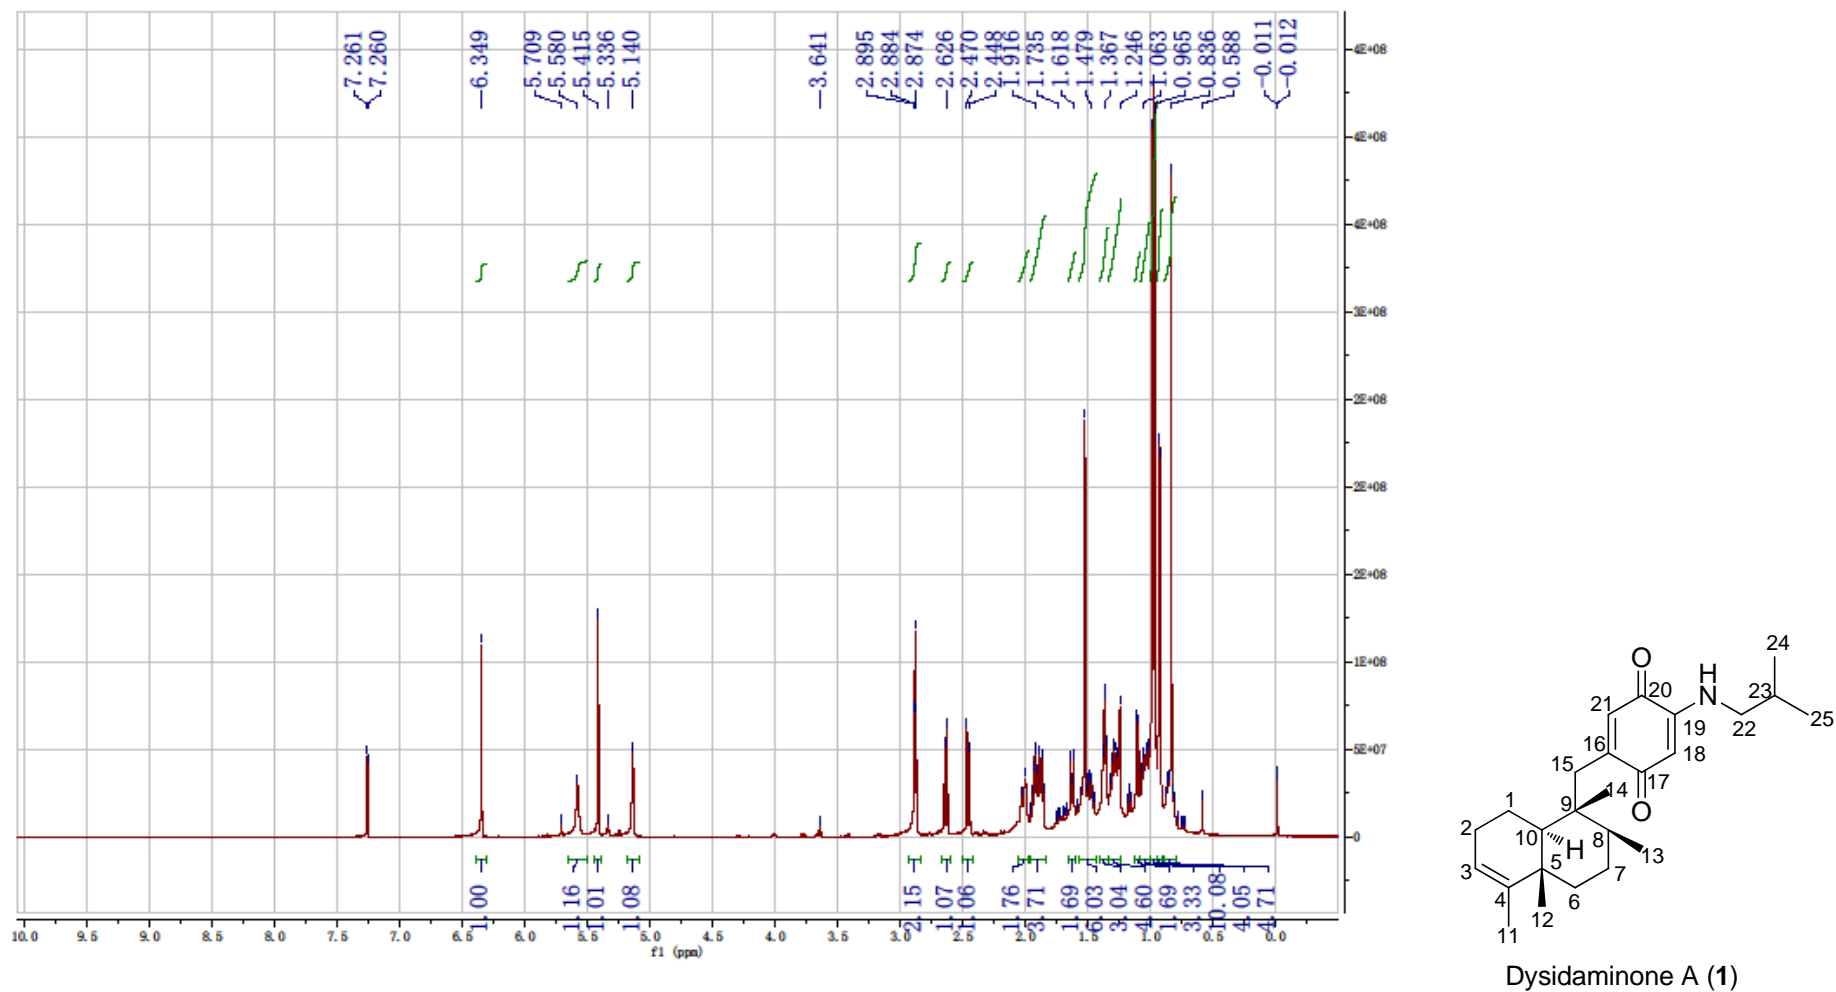

**Figure S1.**  $^1\text{H}$  NMR Spectrum of Dysidaminone A (1) in  $\text{CDCl}_3$ .

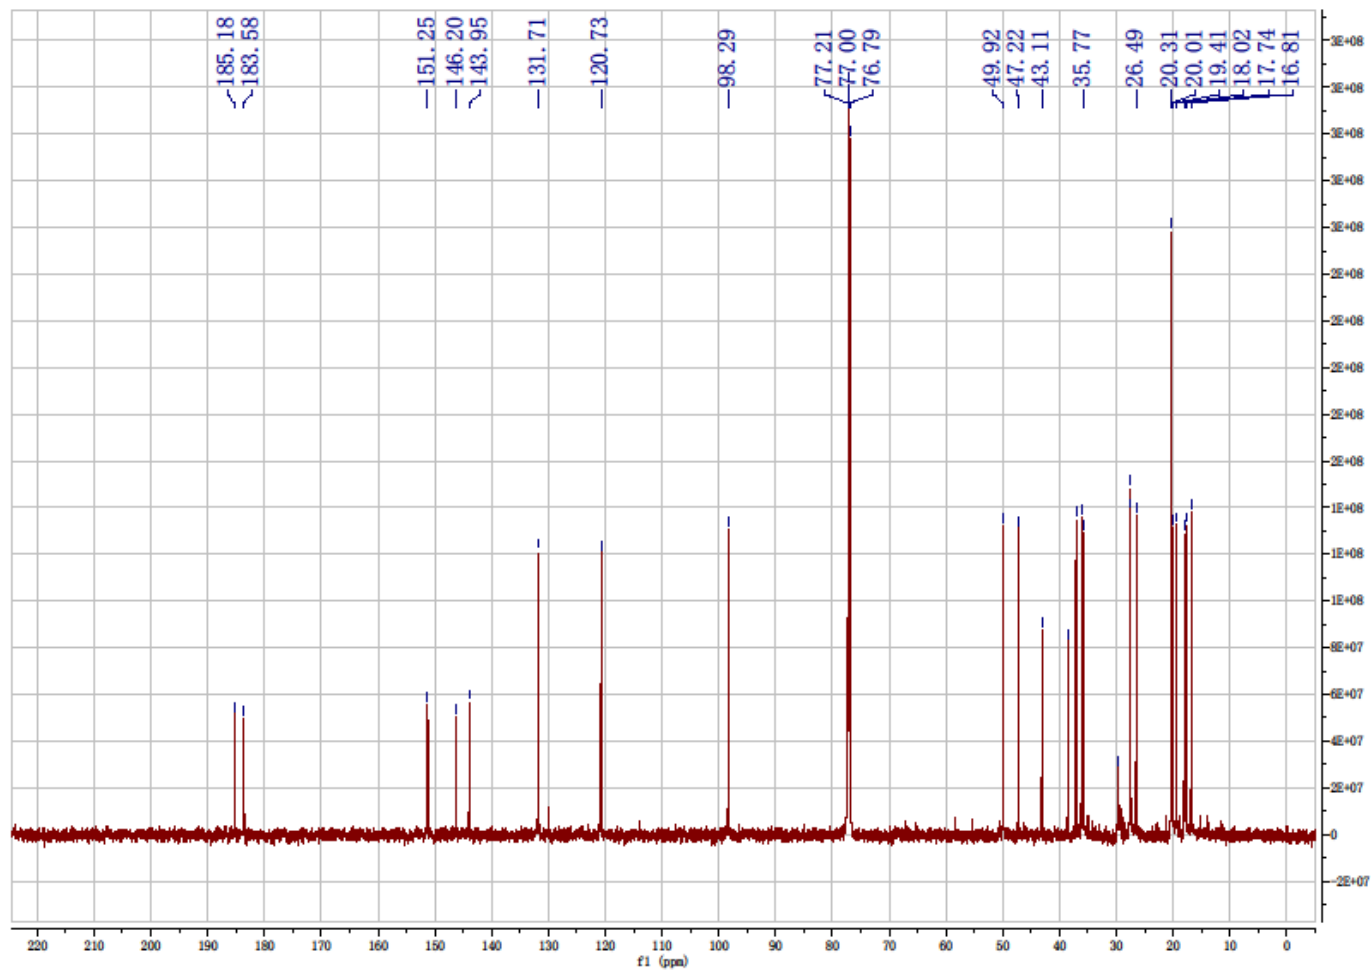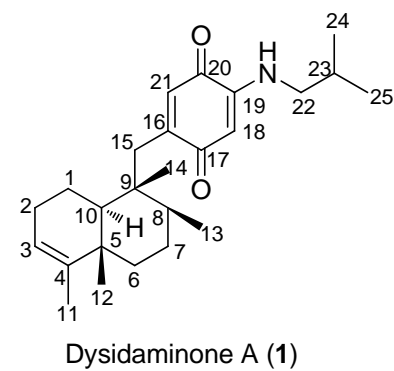

**Figure S2.**  $^{13}\text{C}$  NMR Spectrum of Dysidaminone A (1) in  $\text{CDCl}_3$ .



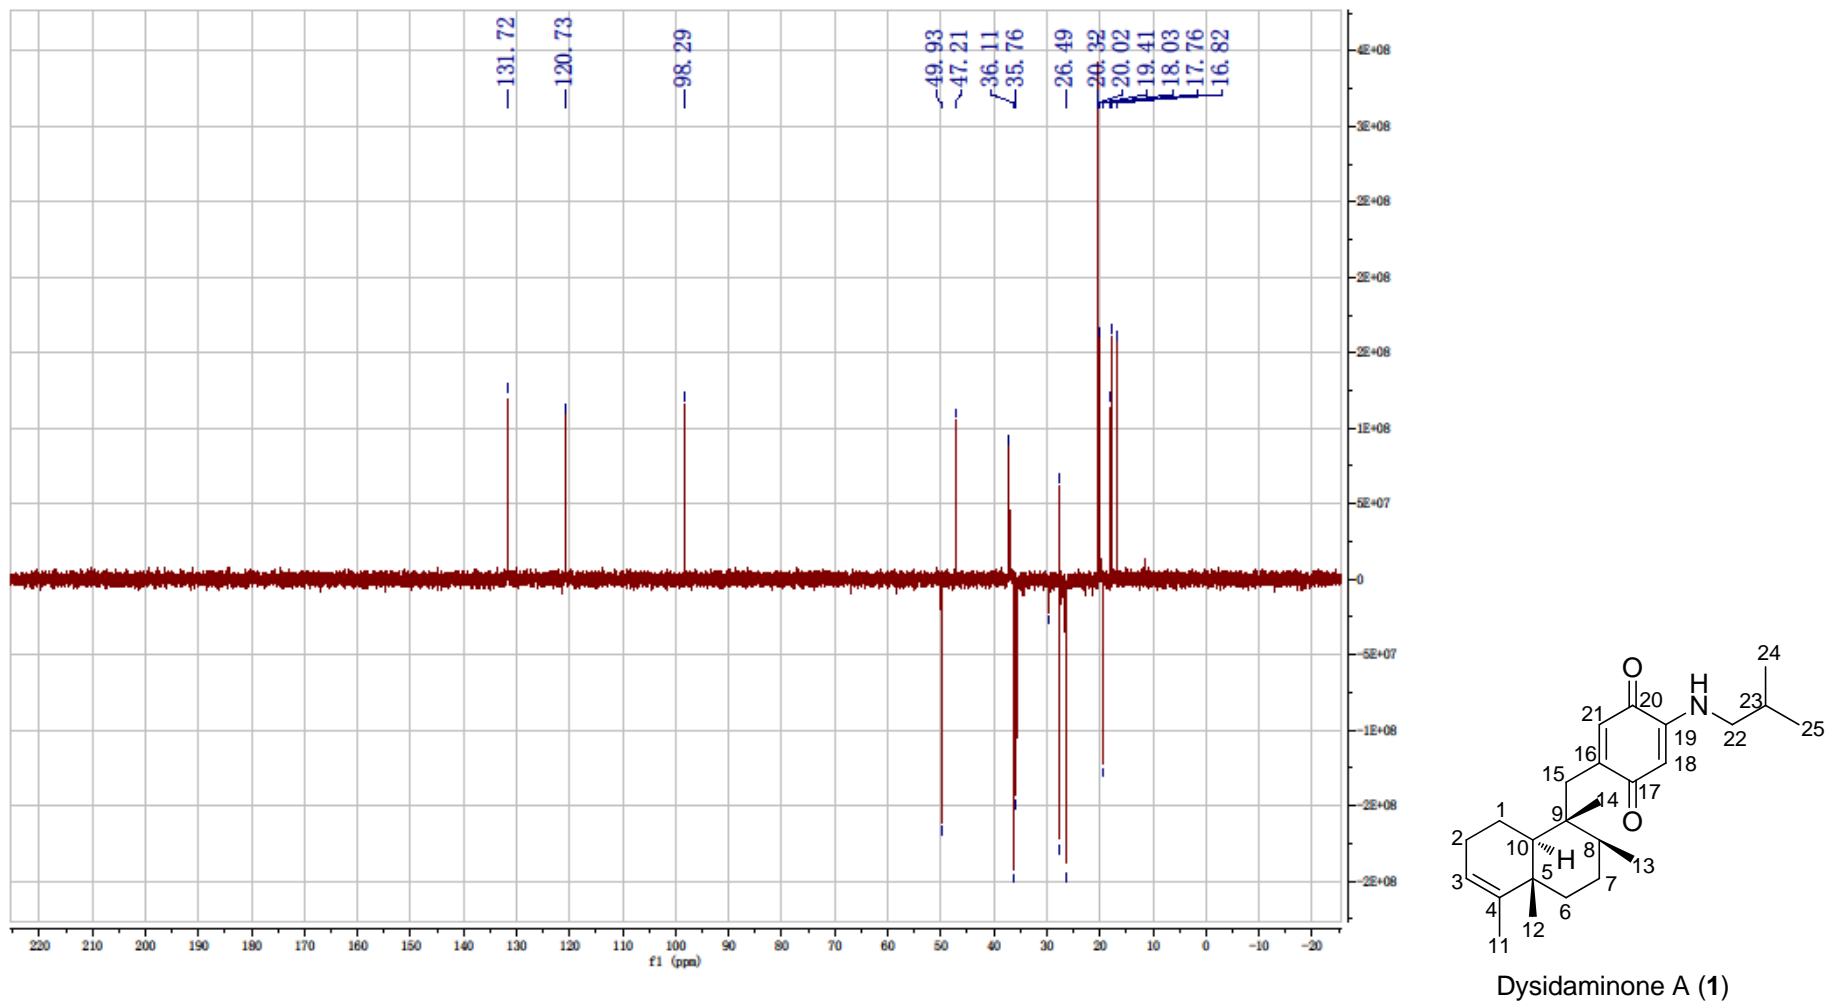

**Figure S3.** DEPT135 Spectrum of Dysidaminone A (1) in CDCl<sub>3</sub>.

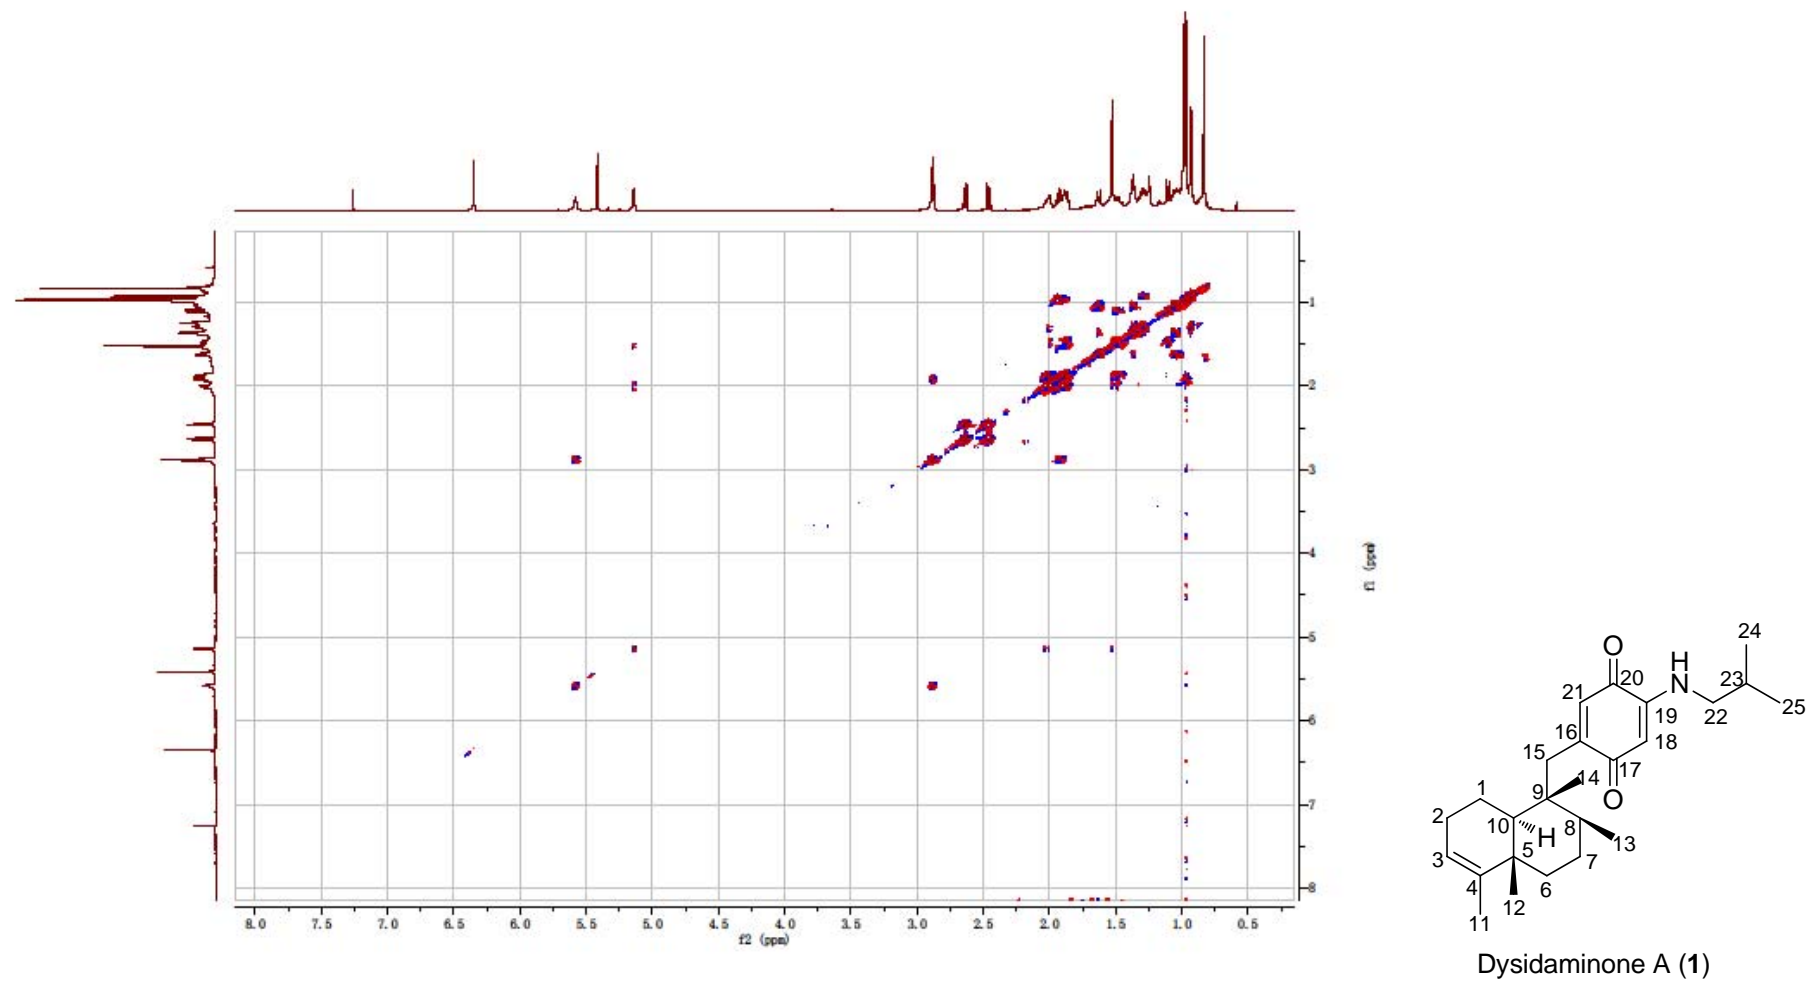

**Figure S4.**  $^1\text{H}$ - $^1\text{H}$  COSY Spectrum of Dysidaminone A (1) in  $\text{CDCl}_3$ .

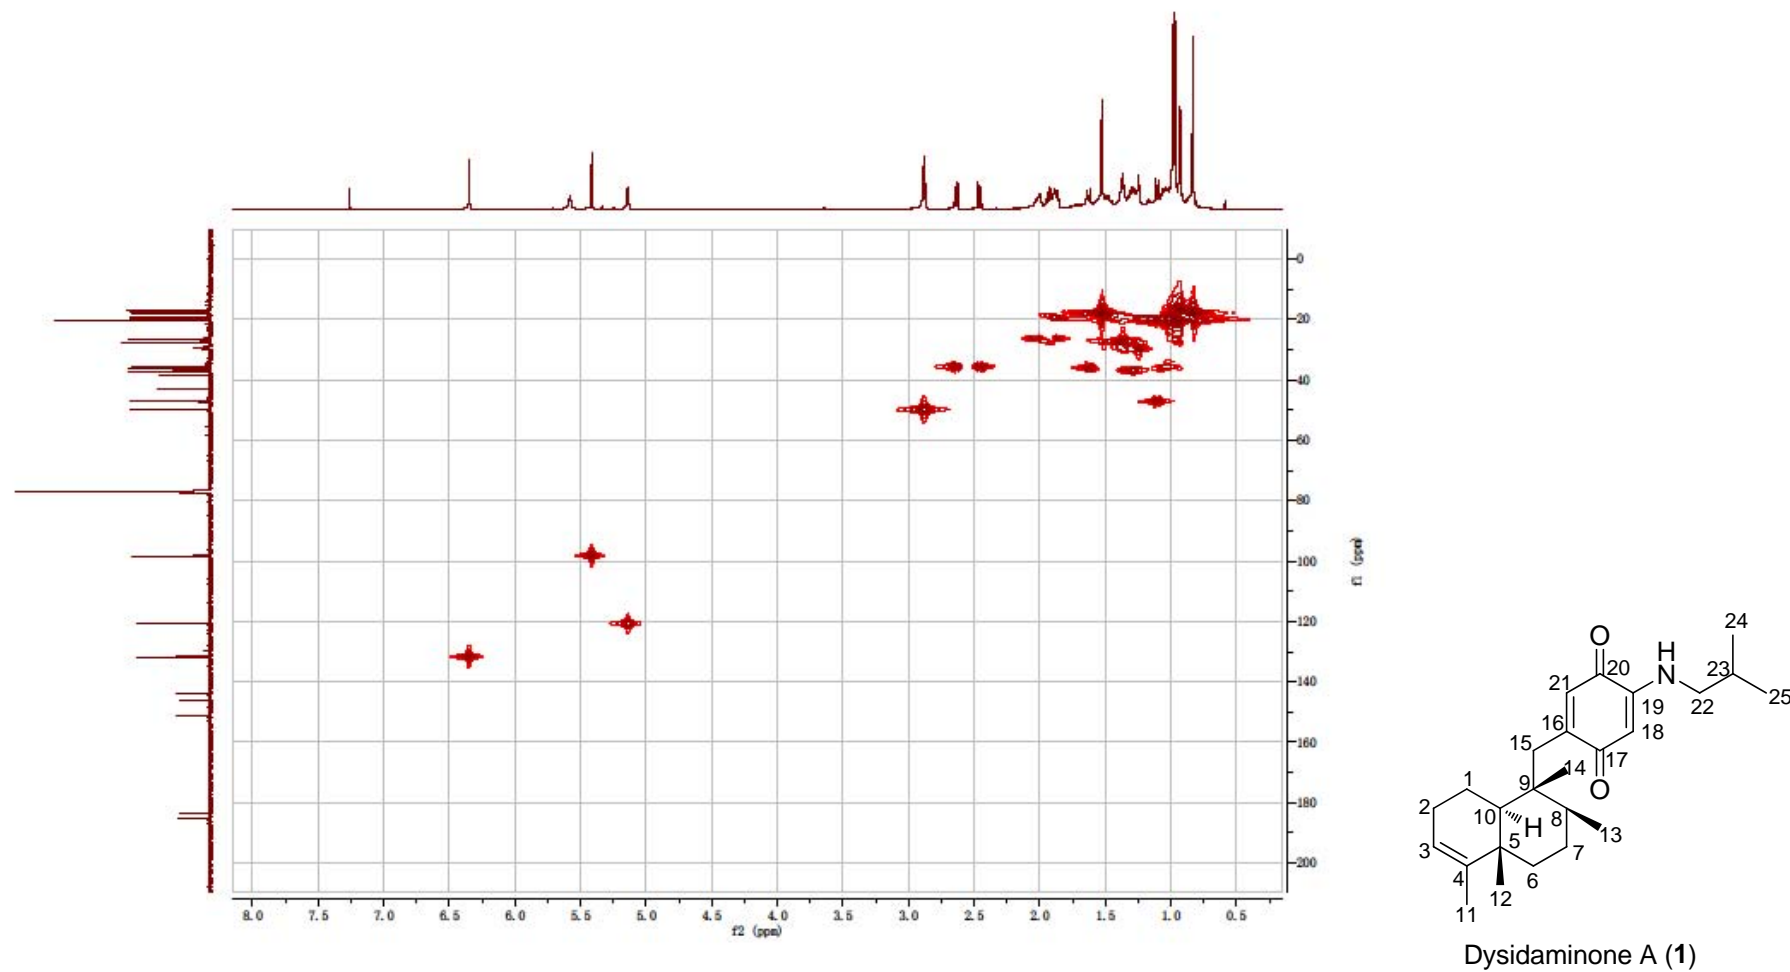

**Figure S5.** HSQC Spectrum of Dysidaminone A (1) in CDCl<sub>3</sub>.

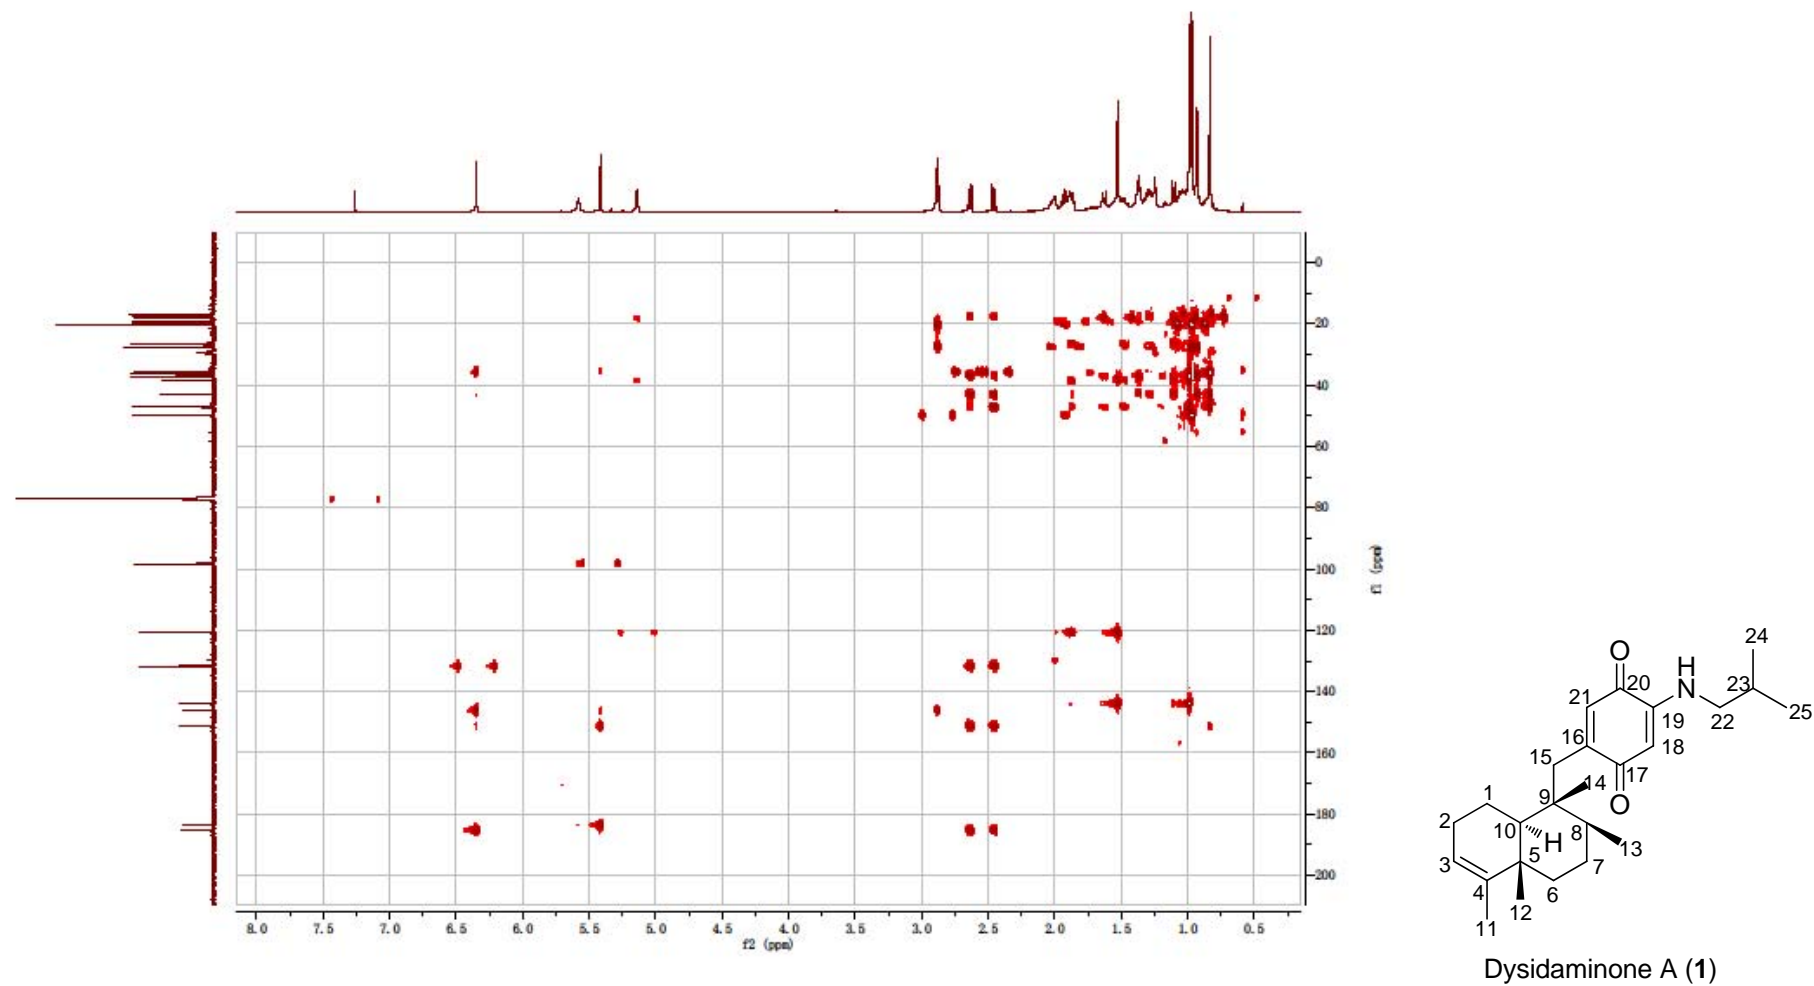

**Figure S6.** HMBC Spectrum of Dysidaminone A (1) in CDCl<sub>3</sub>.

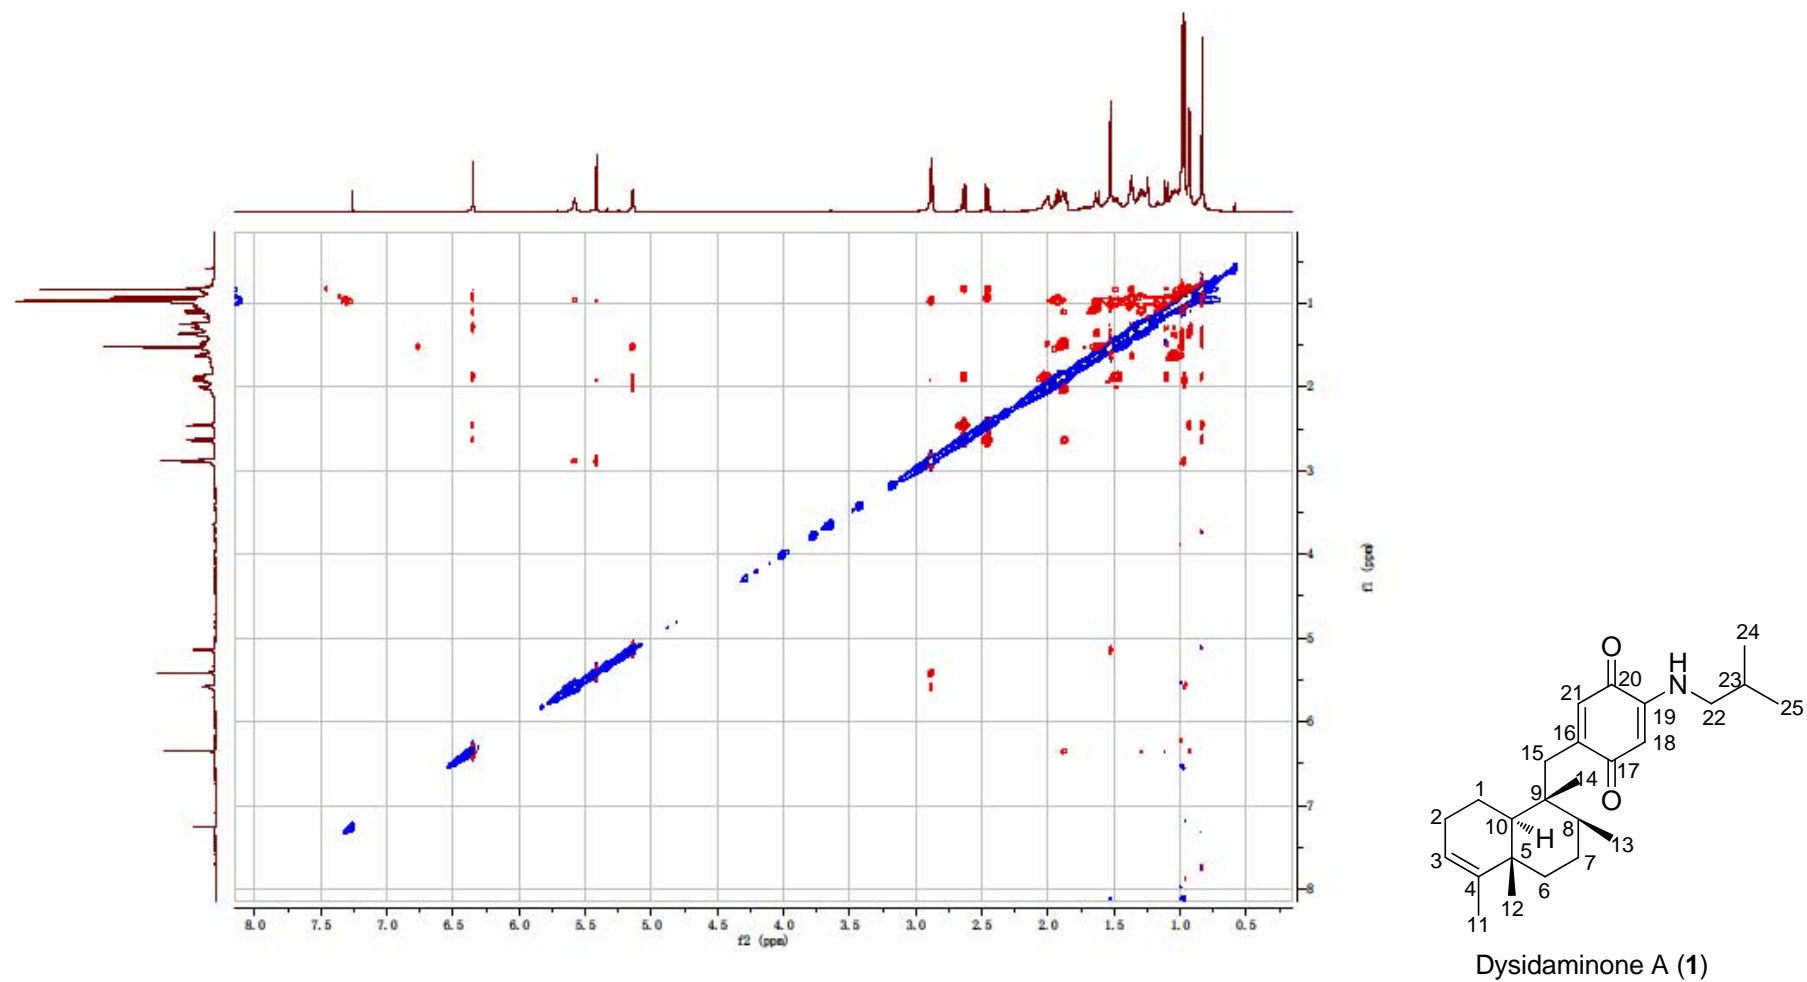

**Figure S7.** NOESY Spectrum of Dysidaminone A (**1**) in CDCl<sub>3</sub>.



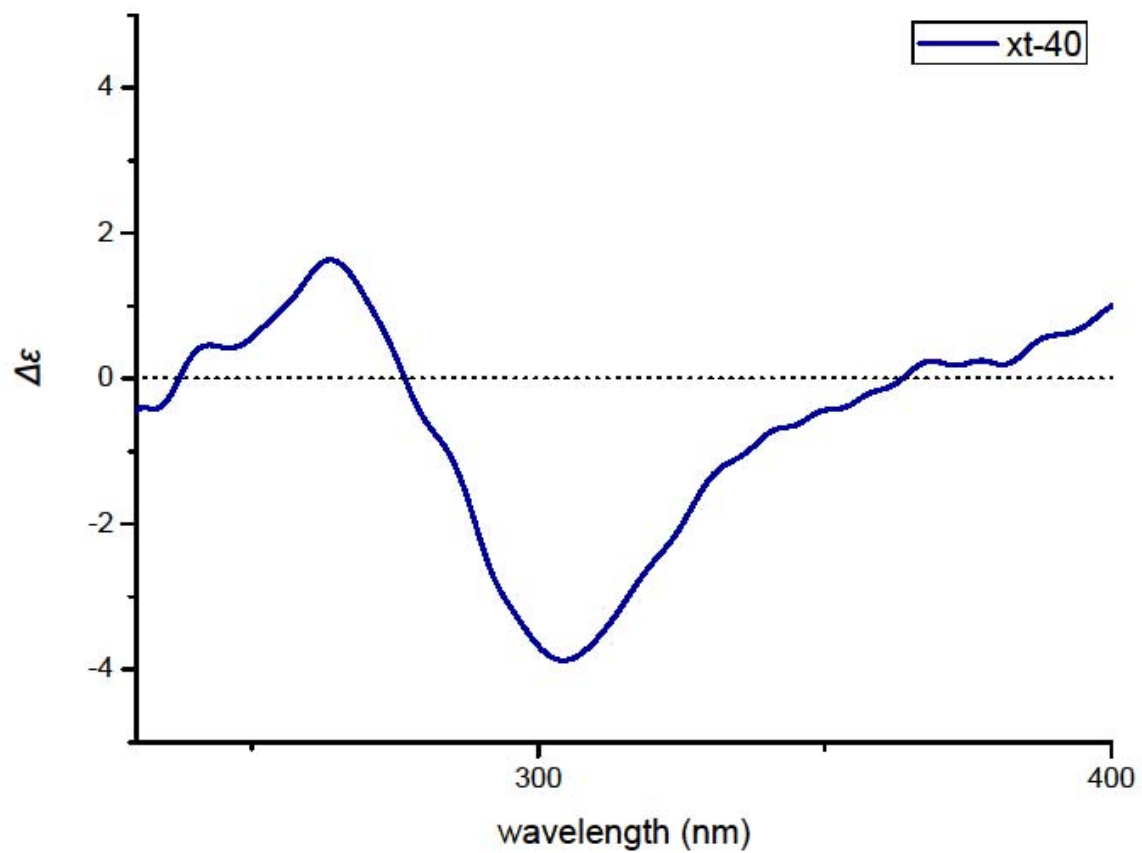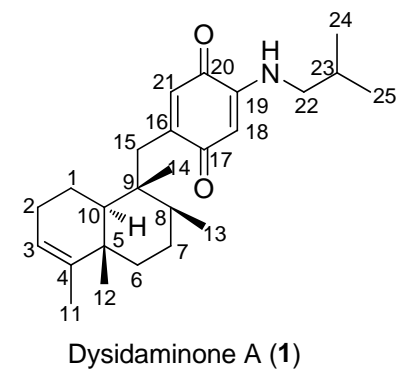

**Figure S9.** CD Spectrum of Dysidaminone A (1) in MeOH.

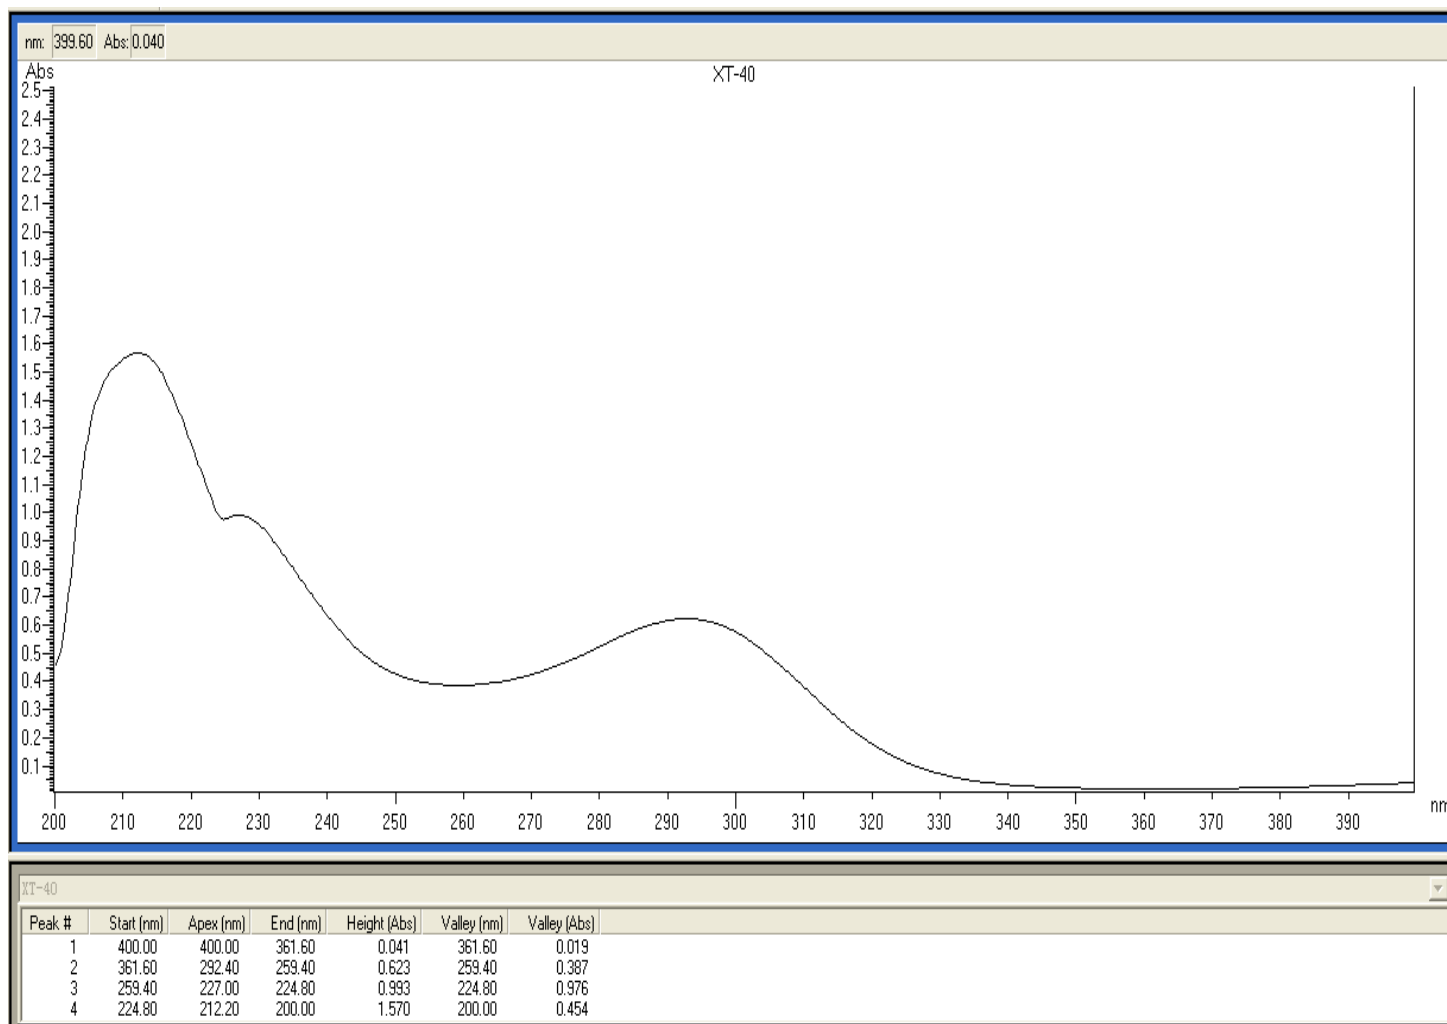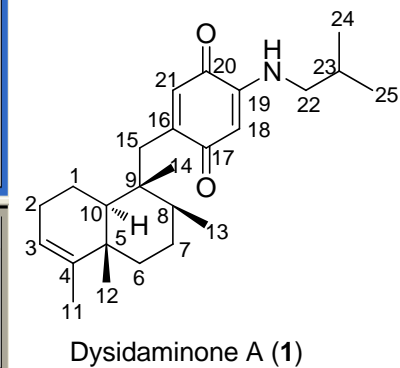

**Figure S10.** UV Spectrum of Dysidaminone A (1) in MeOH.



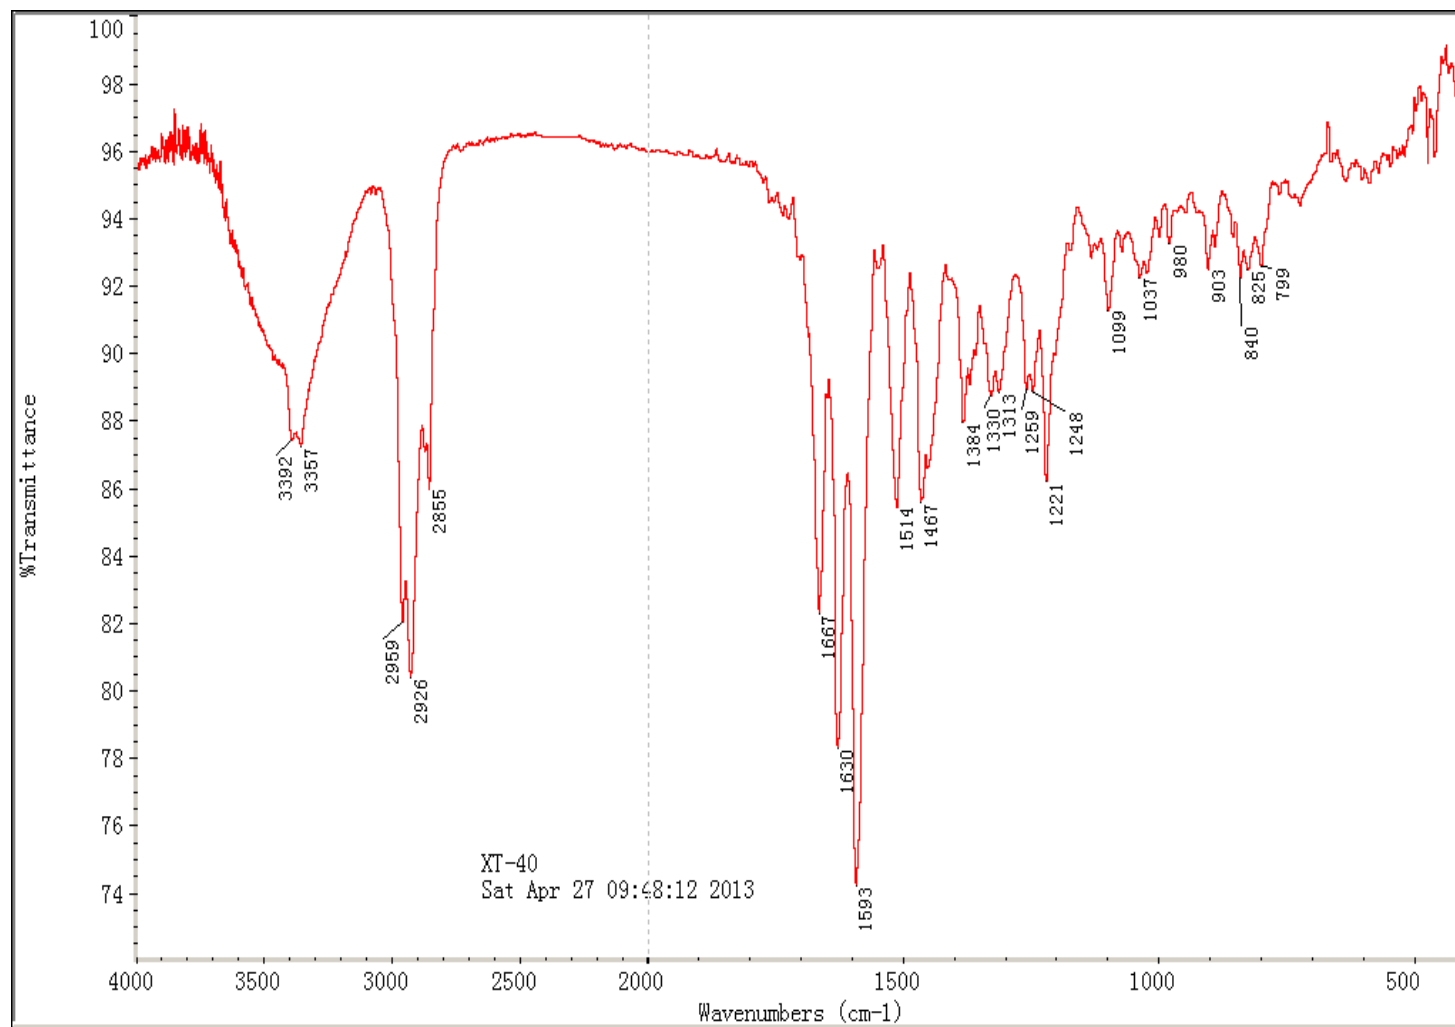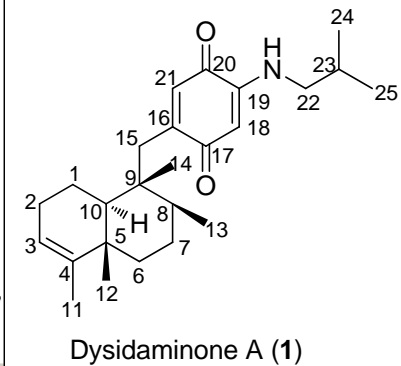

Figure S11. IR Spectrum of Dysidaminone A (1).

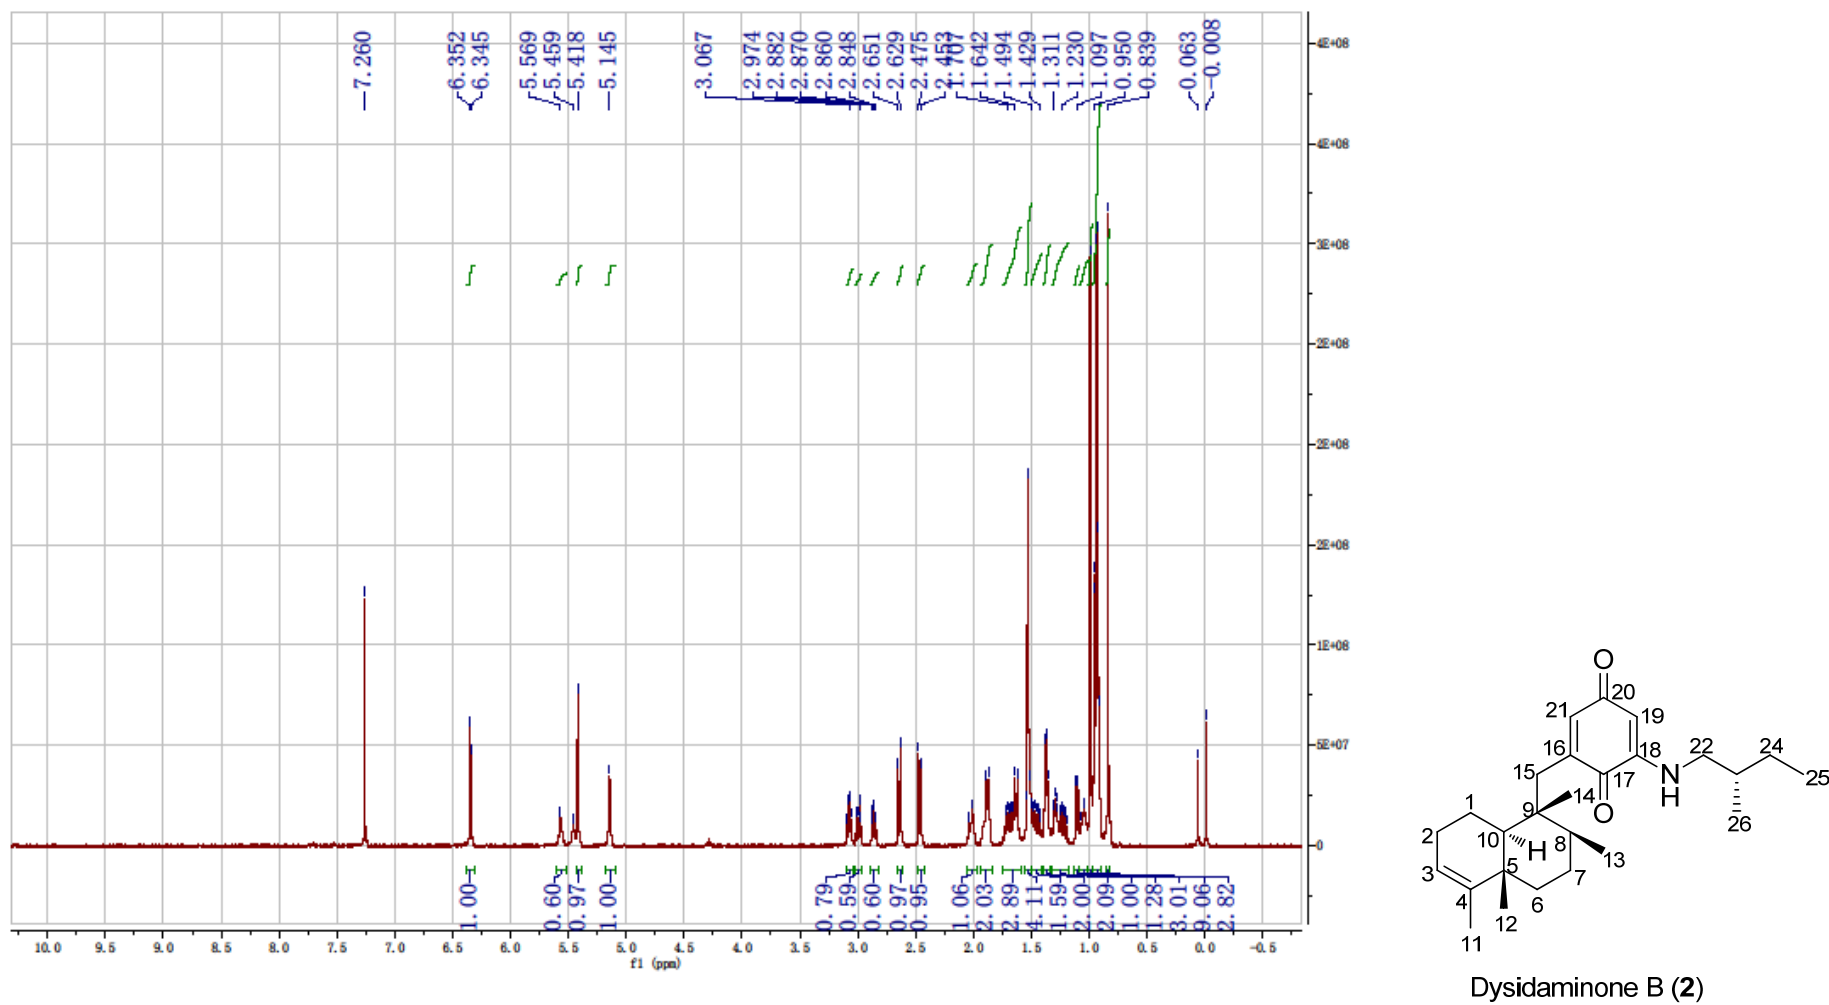

**Figure S12.** <sup>1</sup>H NMR Spectrum of Dysidaminone B (2) in CDCl<sub>3</sub>.

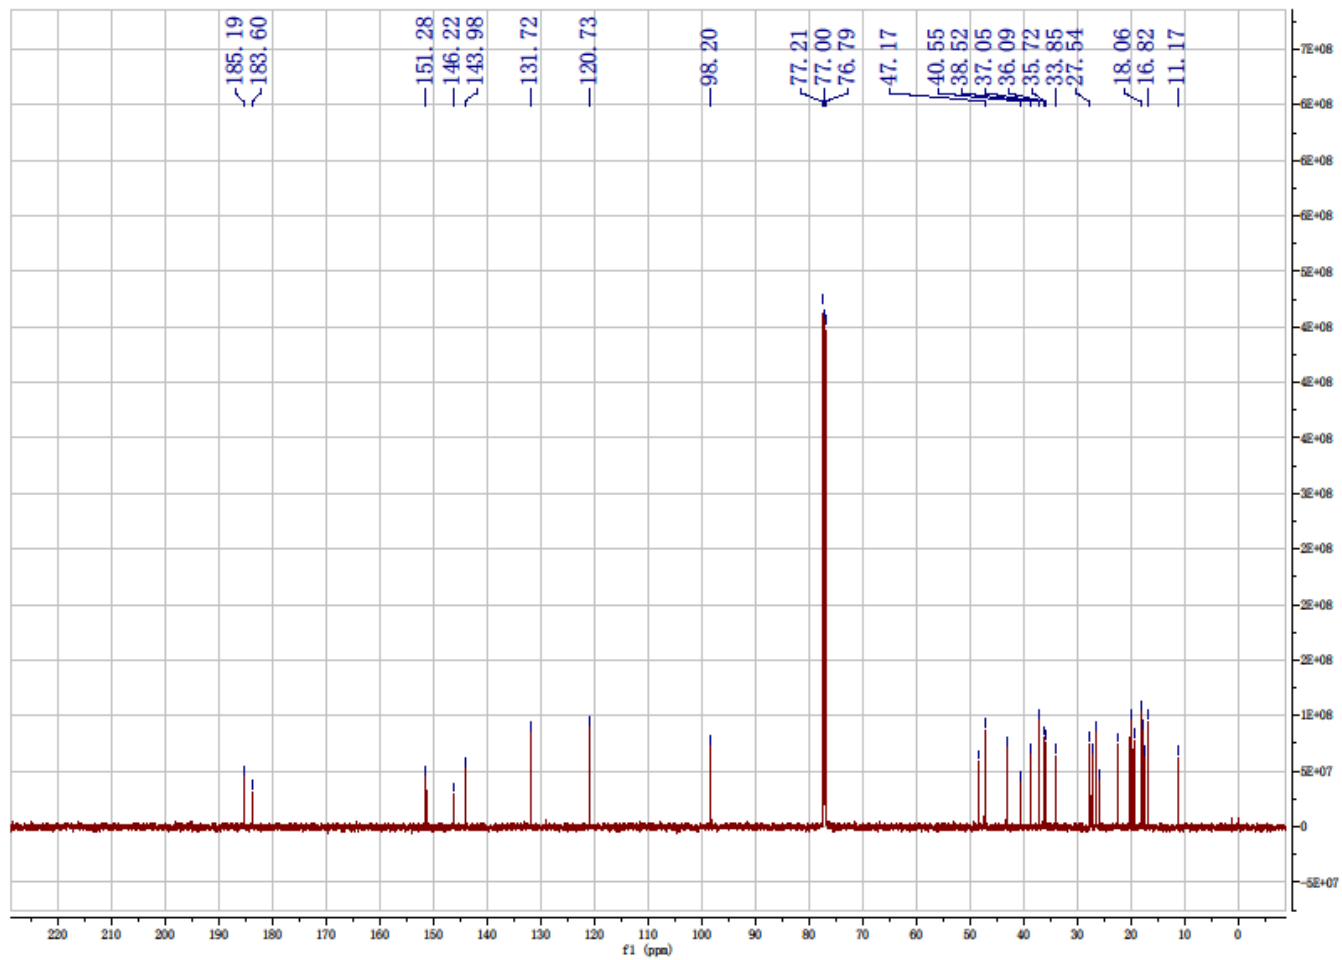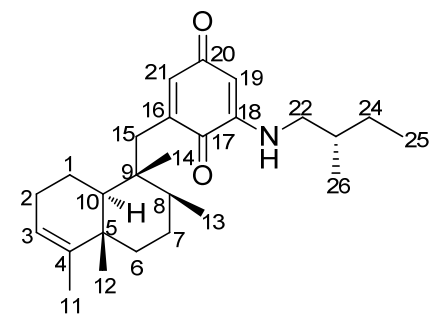

Dysidaminone B (2)

Figure S13.  $^{13}\text{C}$  NMR Spectrum of Dysidaminone B (2) in  $\text{CDCl}_3$ .

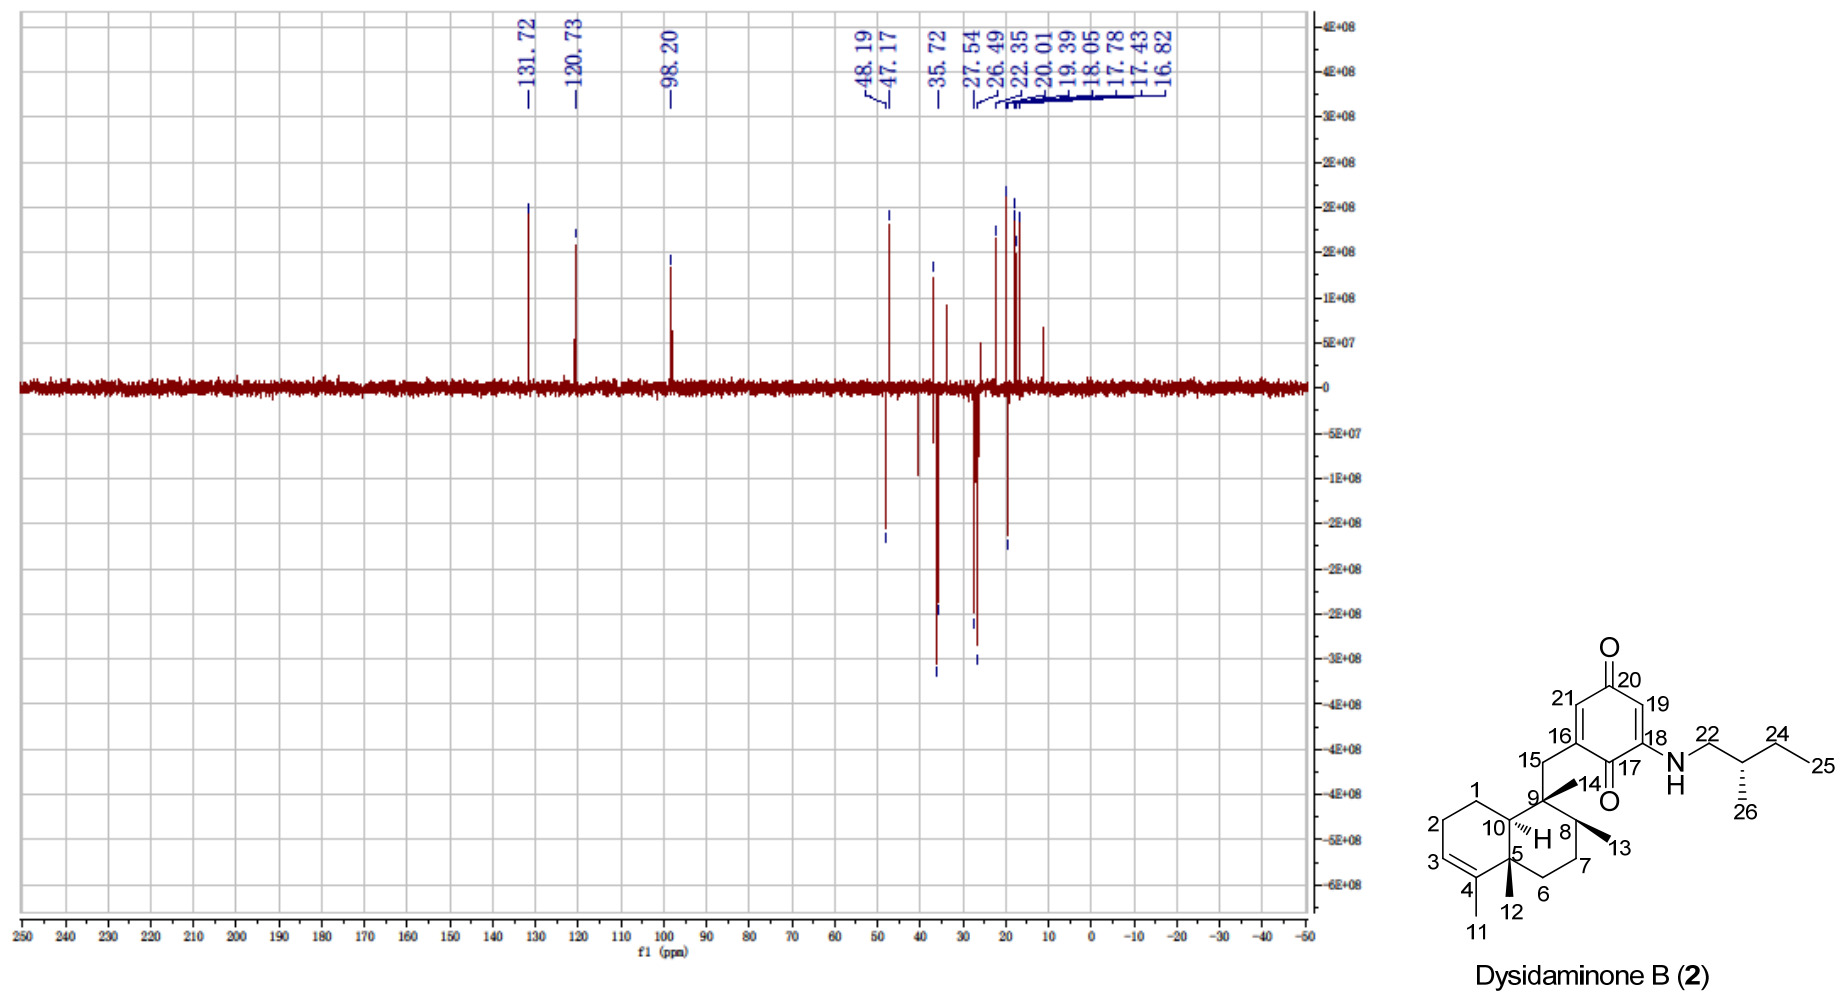

**Figure S14.** DEPT135 Spectrum of Dysidaminone B (2) in CDCl<sub>3</sub>.

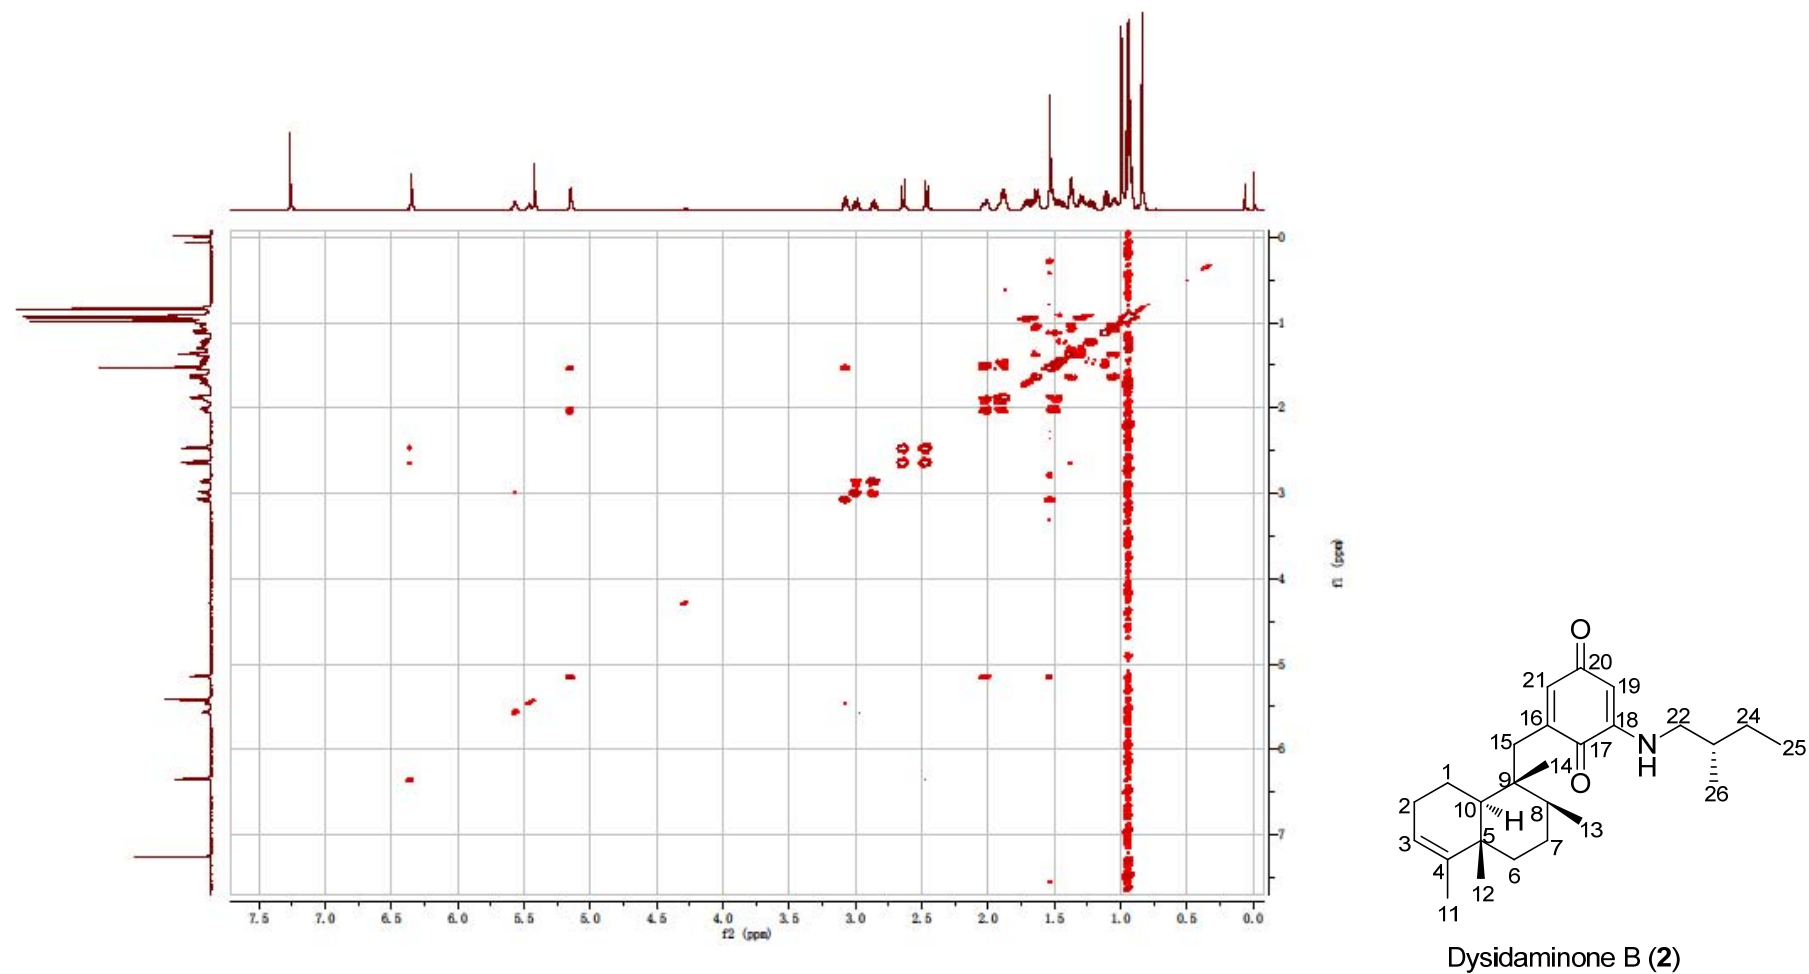

**Figure S15.**  $^1\text{H}$ - $^1\text{H}$  COSY Spectrum of Dysidaminone B (2) in  $\text{CDCl}_3$ .

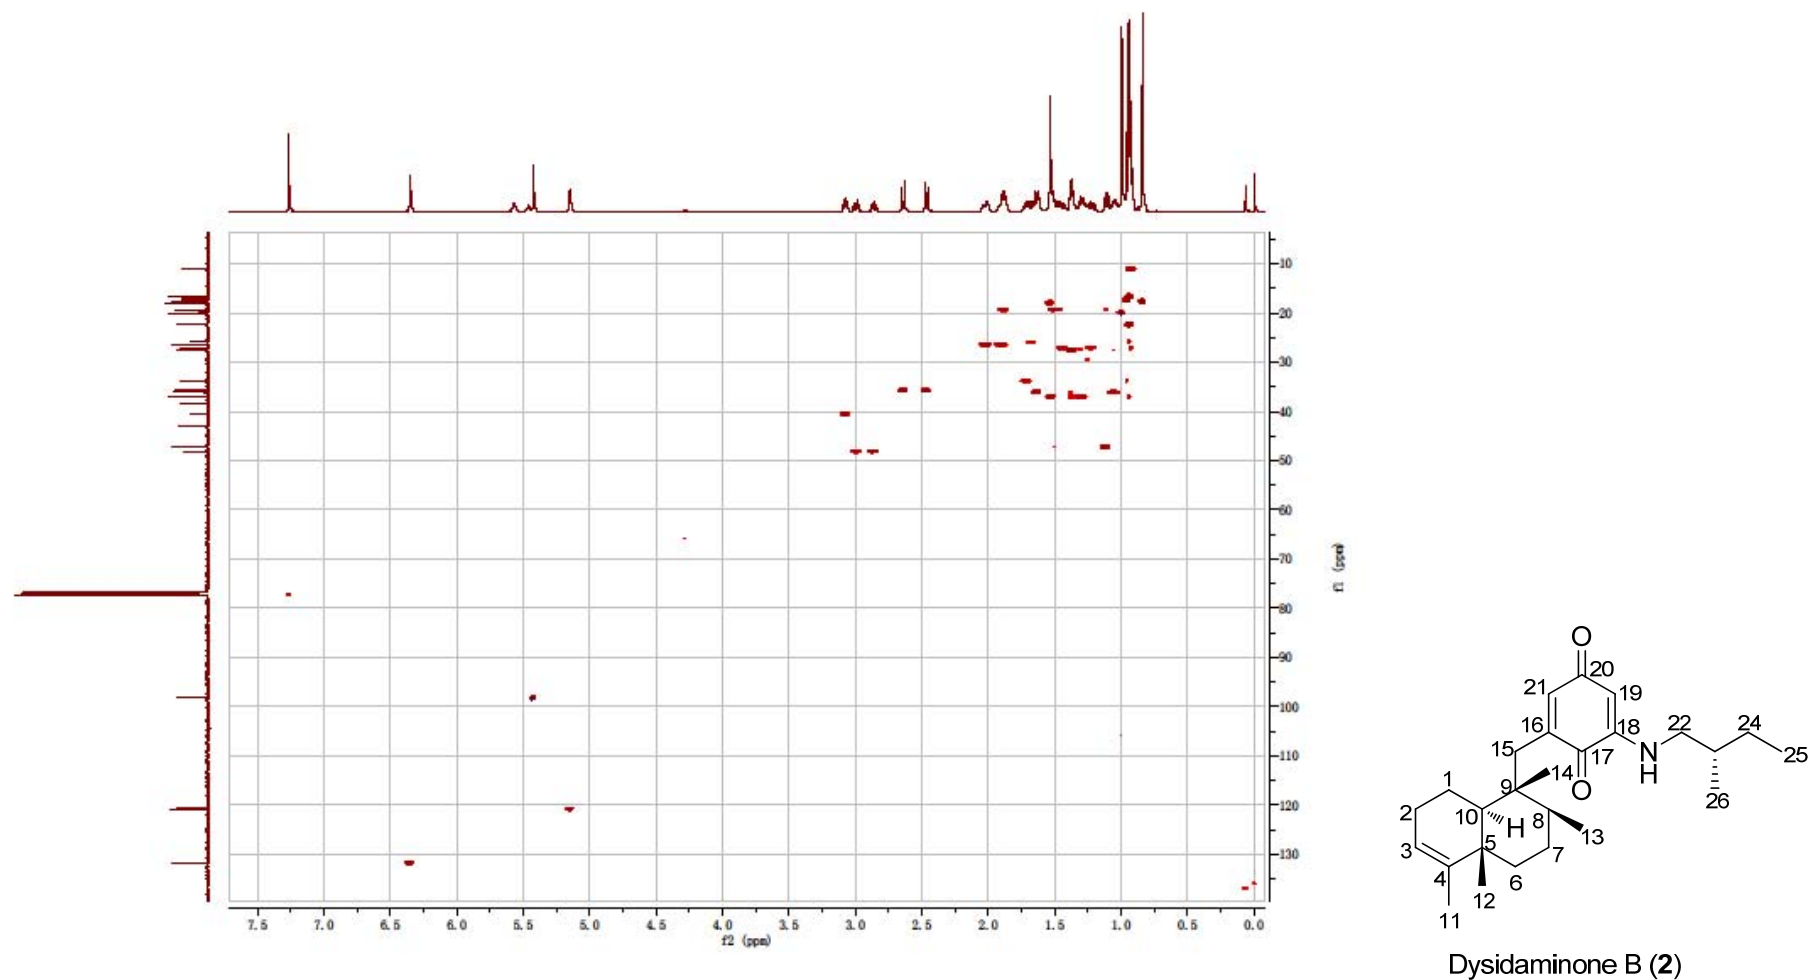

**Figure S16.** HSQC Spectrum of Dysidaminone B (2) in CDCl<sub>3</sub>.

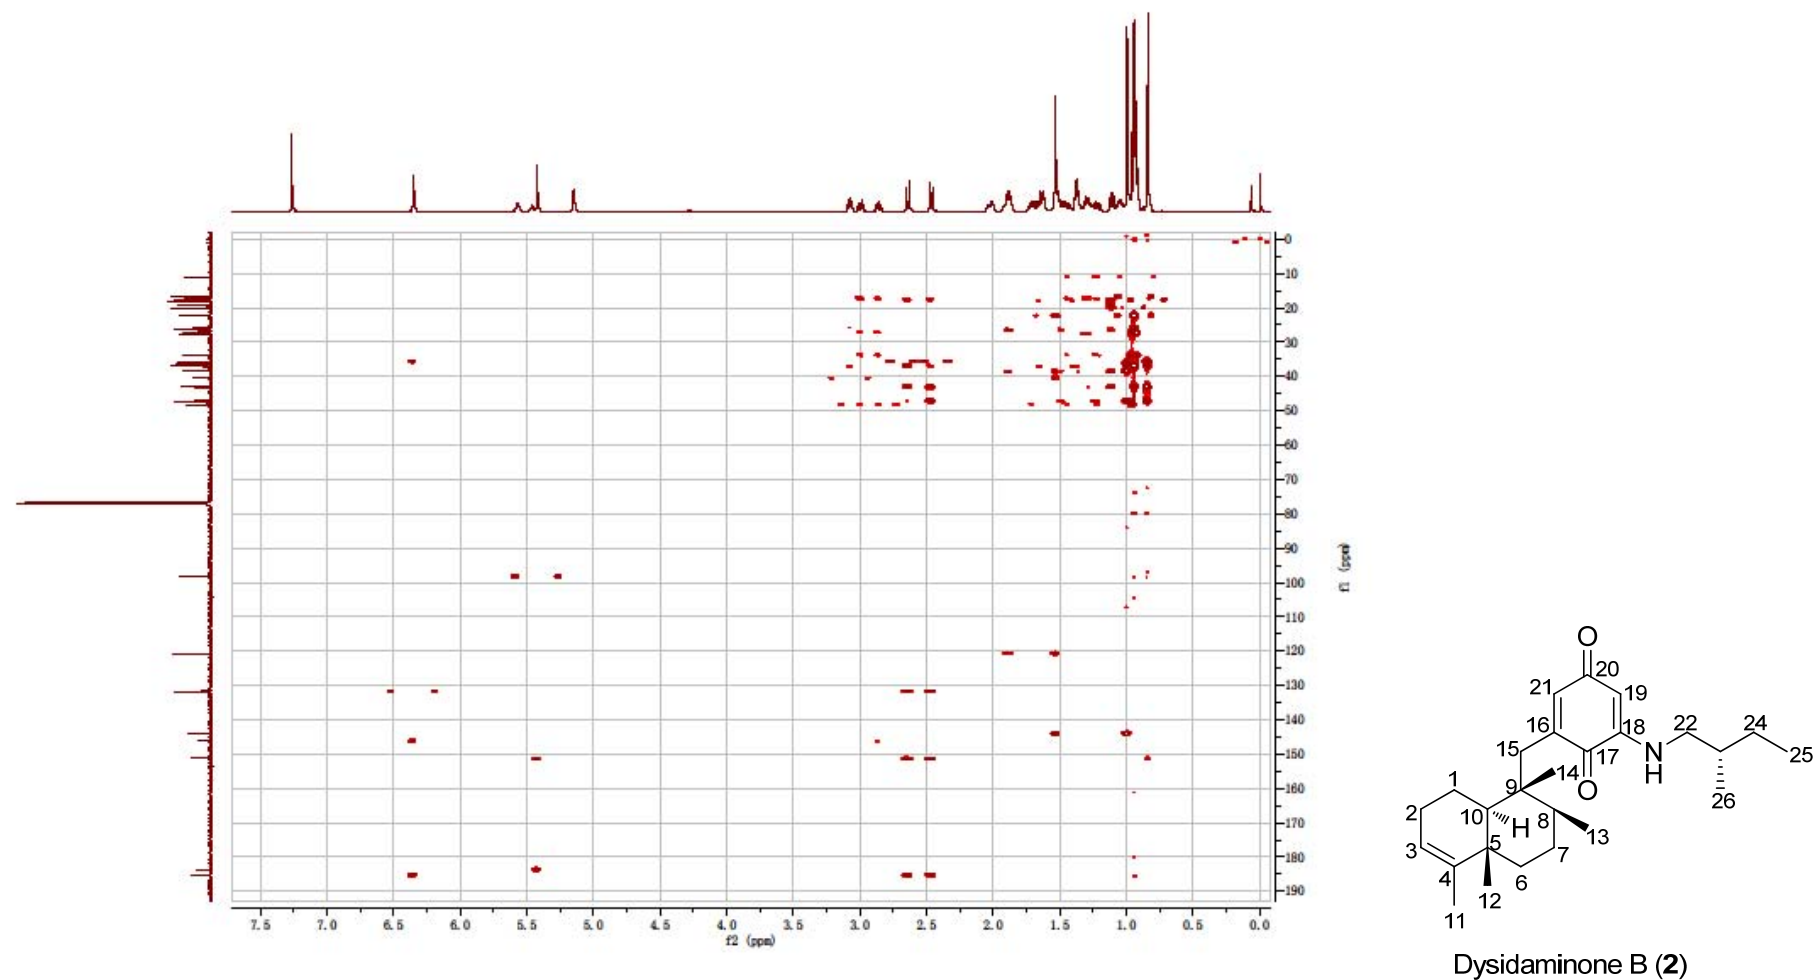

**Figure S17.** HMBC Spectrum of Dysidaminone B (2) in CDCl<sub>3</sub>.

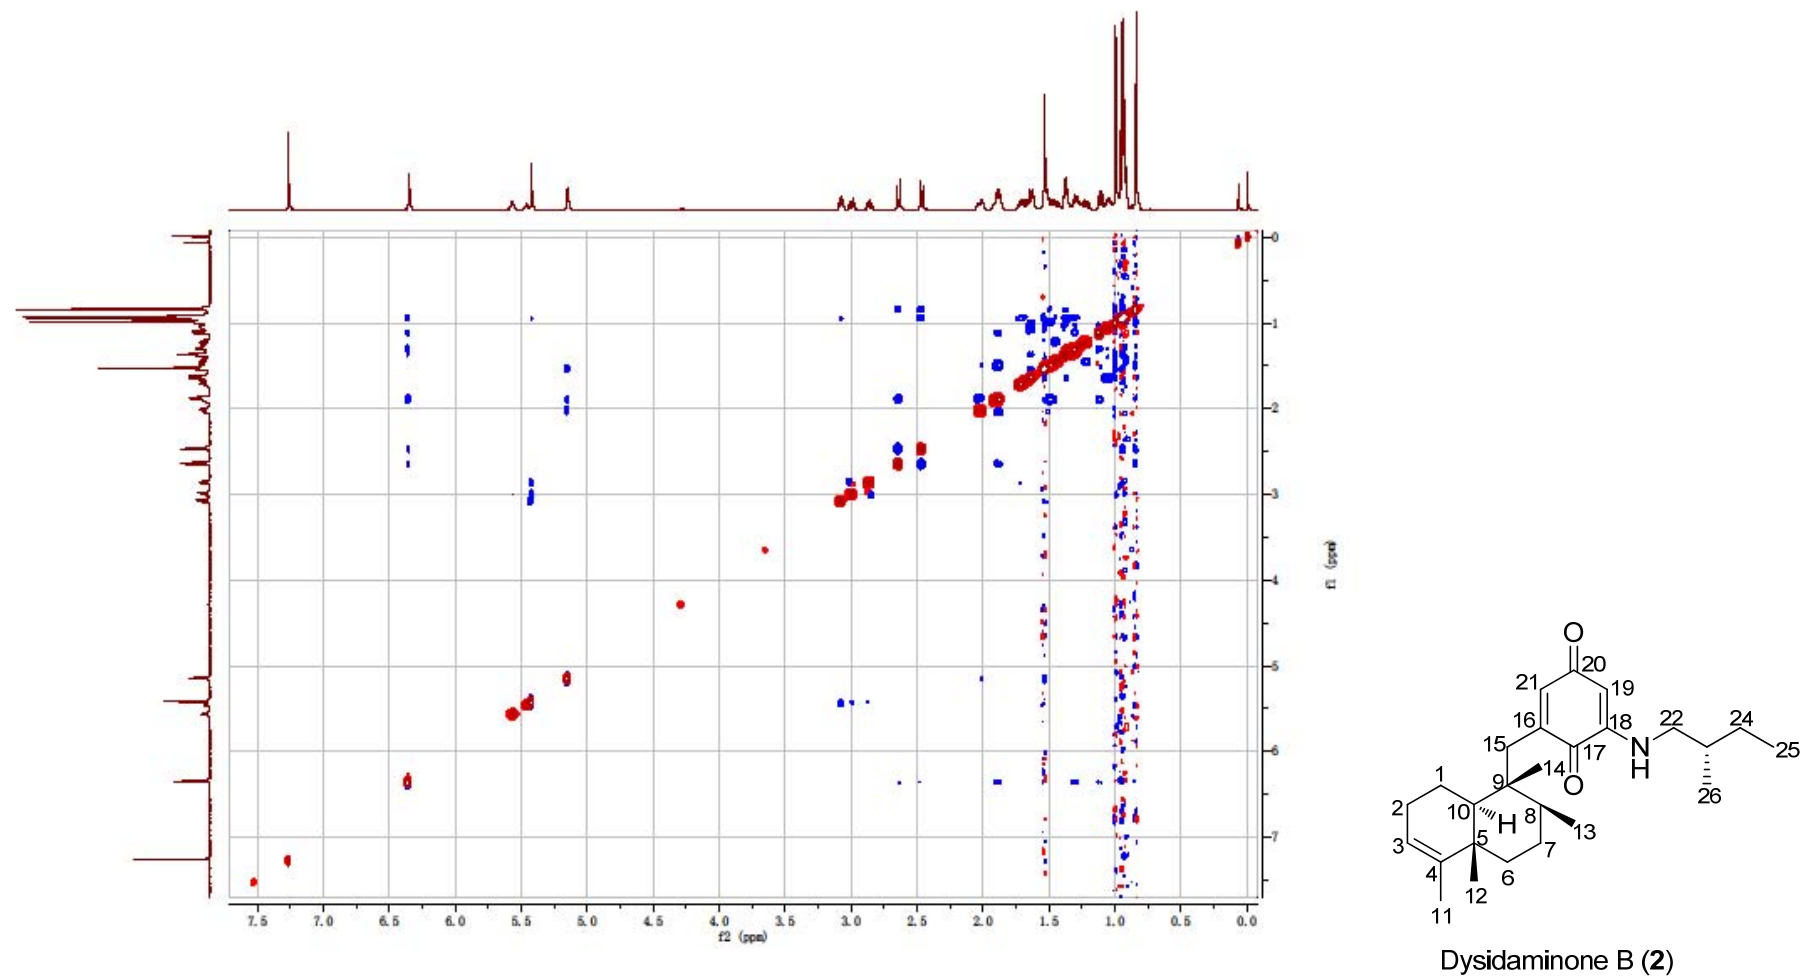

**Figure S18.** NOESY Spectrum of Dysidaminone B (**2**) in CDCl<sub>3</sub>.



## Elemental Composition Report

Page 1

Tolerance = 10.0 PPM / DBE: min = -1.5, max = 50.0

Selected filters: None

Monoisotopic Mass, Even Electron Ions

3 formula(e) evaluated with 1 results within limits (up to 50 closest results for each mass)

Elements Used:

C: 10-27 H: 10-50 N: 1-1 O: 1-2

SIPI

XT-42 M.W.=397

WQ13-111H 11 (0.387) AM (Cen,4, 80.00, Ar,5000.0,378.11,0.70); Sm (SG, 2x3.00); Cm (11:24)

Q-ToF micro  
YA019

07-May-2013,15:10:52

TOF MS ES+  
9.97e3

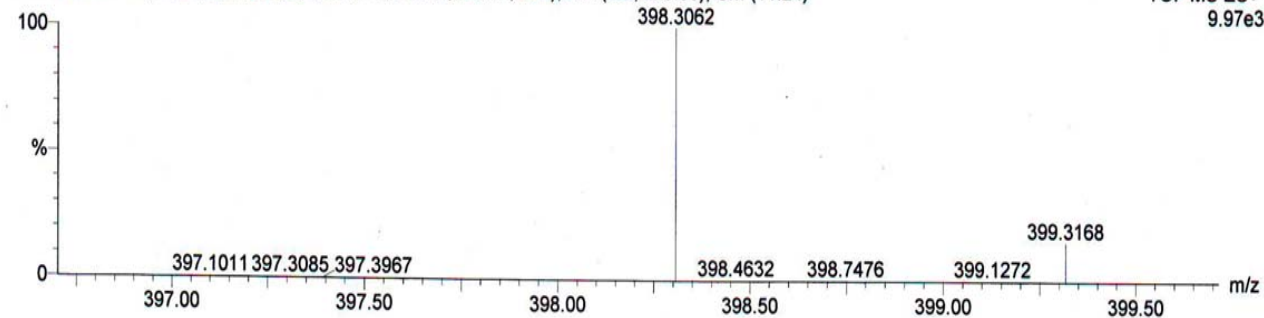

Minimum: 70.00  
Maximum: 100.00

| Minimum | Maximum | DBE  | PPM  |
|---------|---------|------|------|
| 70.00   | 100.00  | -1.5 | 50.0 |

| Mass     | RA     | Calc. Mass | mDa | PPM | DBE | i-FIT     | Formula      |
|----------|--------|------------|-----|-----|-----|-----------|--------------|
| 398.3062 | 100.00 | 398.3059   | 0.3 | 0.8 | 7.5 | 2778376.3 | C26 H40 N O2 |

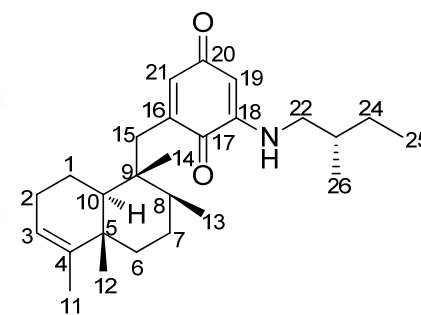

Dysidaminone B (2)

Figure S19. HRESIMS of Dysidaminone B (2).

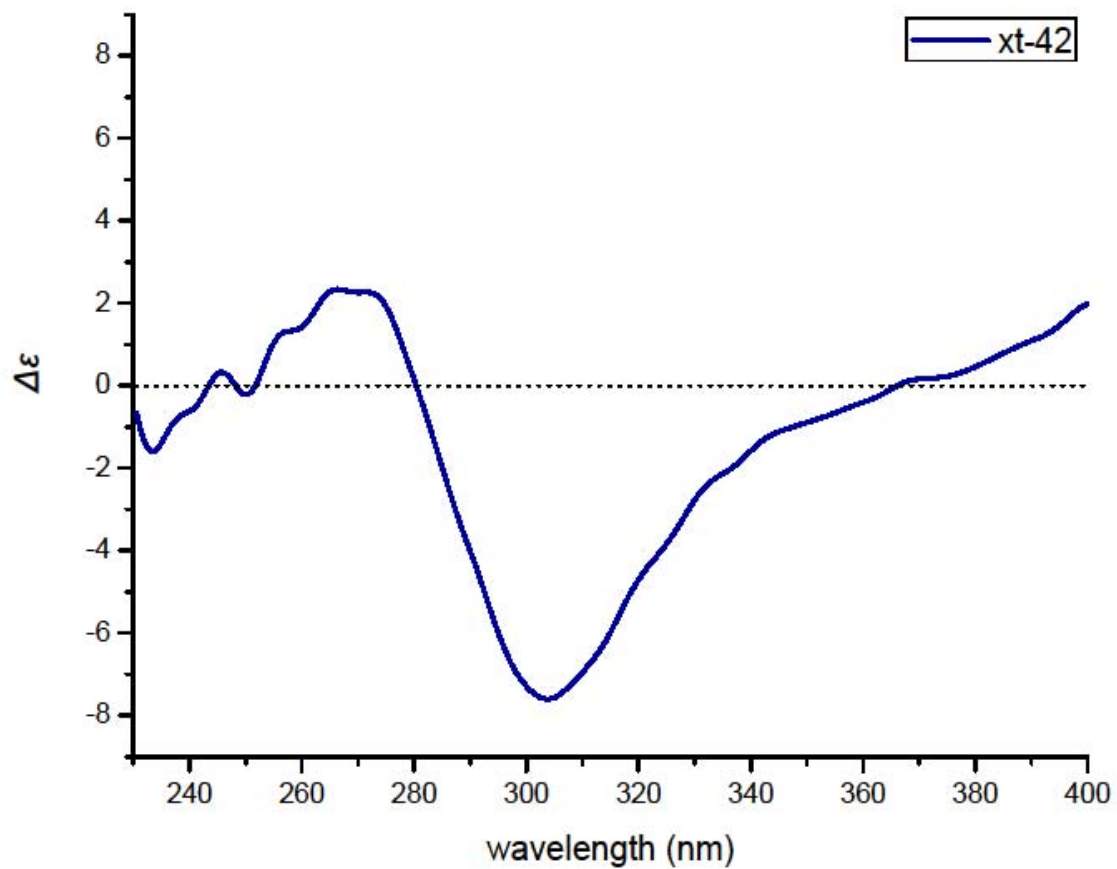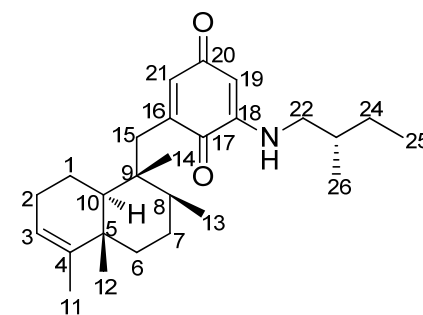

Dysidaminone B (2)

**Figure S20.** CD Spectrum of Dysidaminone B (2) in MeOH.

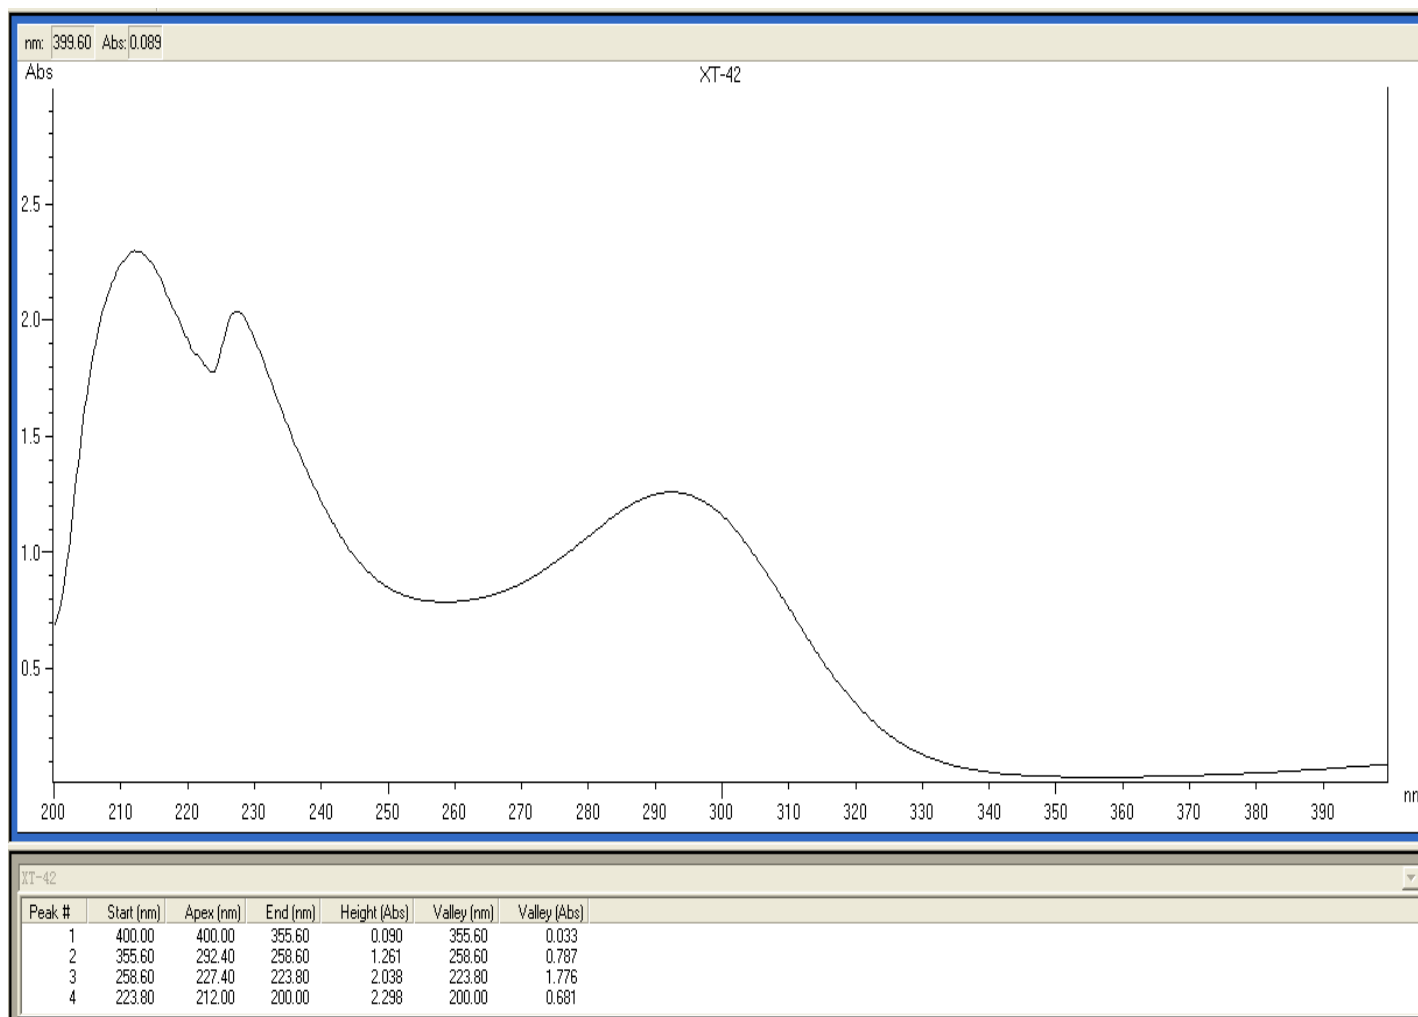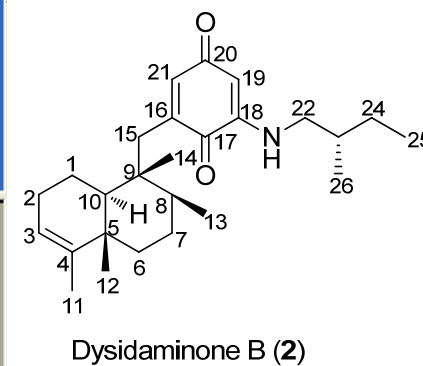

Figure S21. UV Spectrum of Dysidaminone B (2) in MeOH.

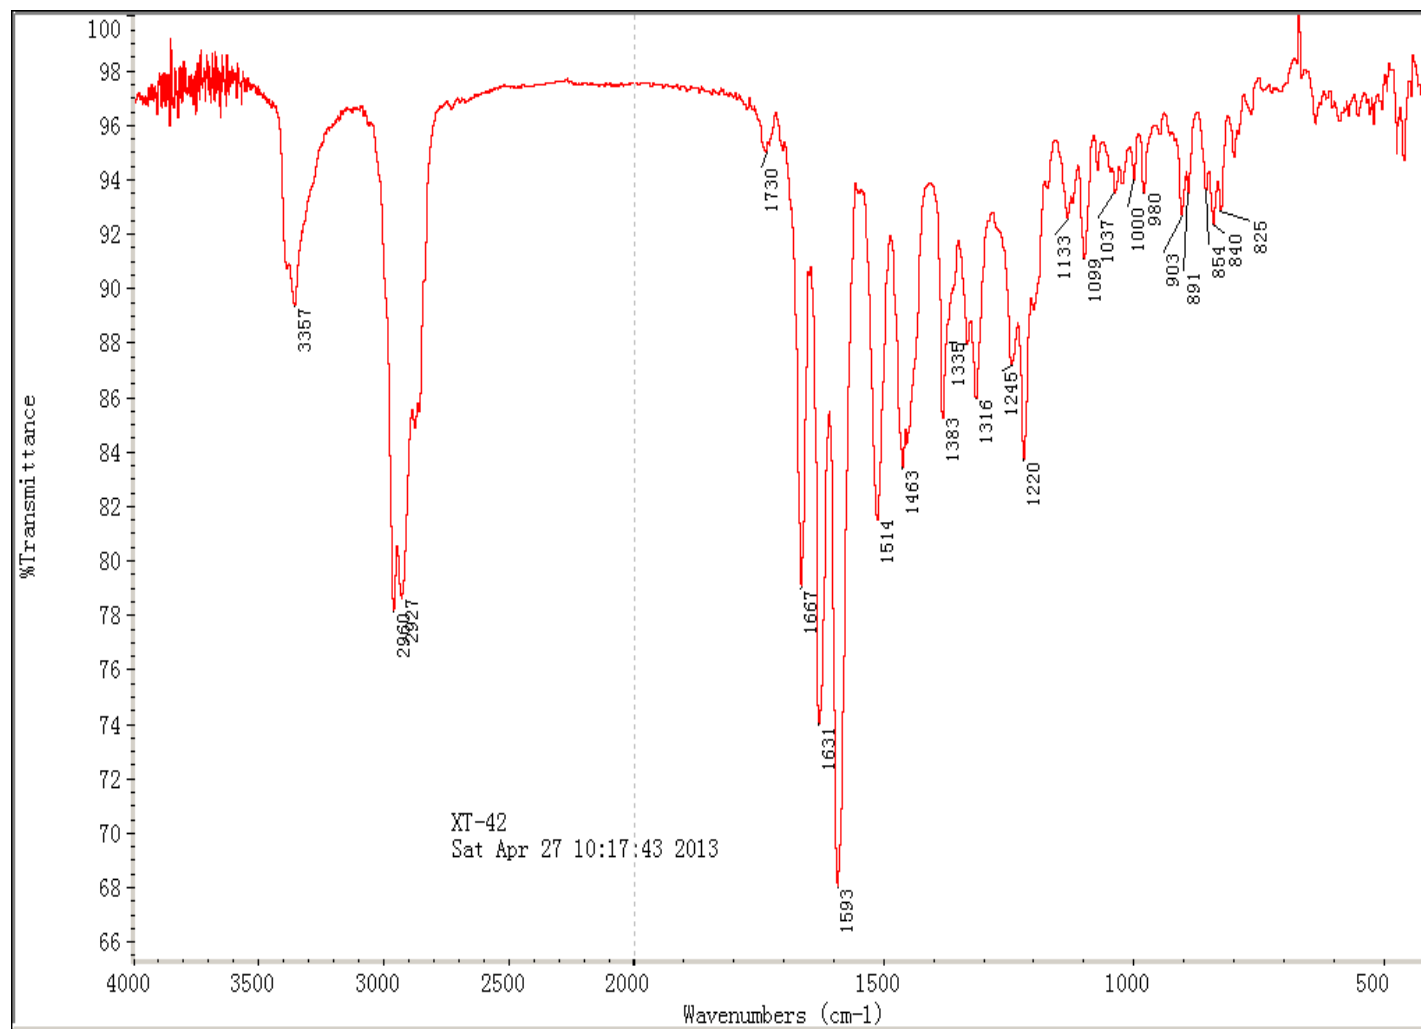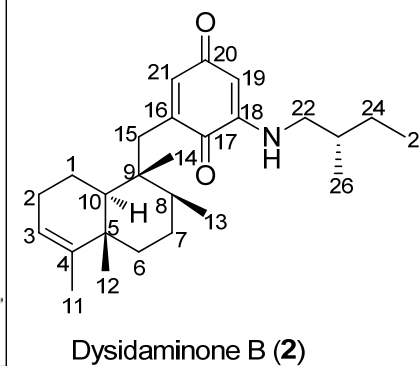

**Figure S22.** IR Spectrum of Dysidaminone B (2).

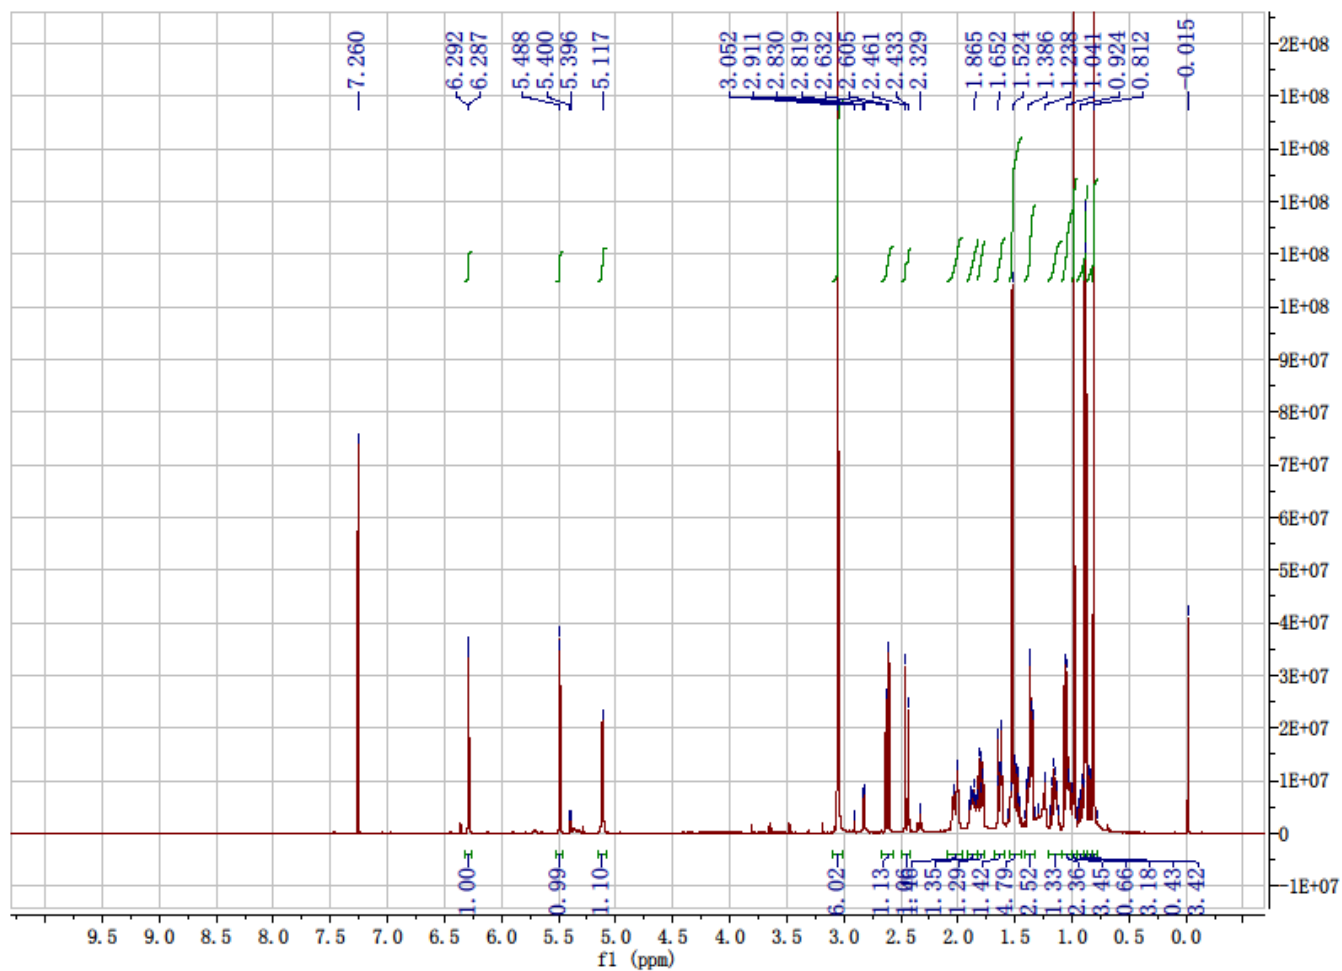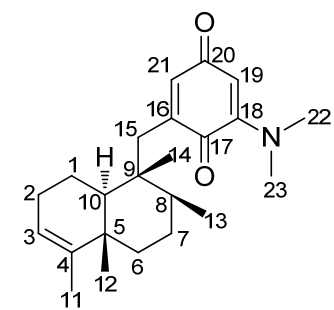

Dysidaminone C (**3**)

**Figure S23.**  $^1\text{H}$  NMR Spectrum of Dysidaminone C (**3**) in  $\text{CDCl}_3$ .

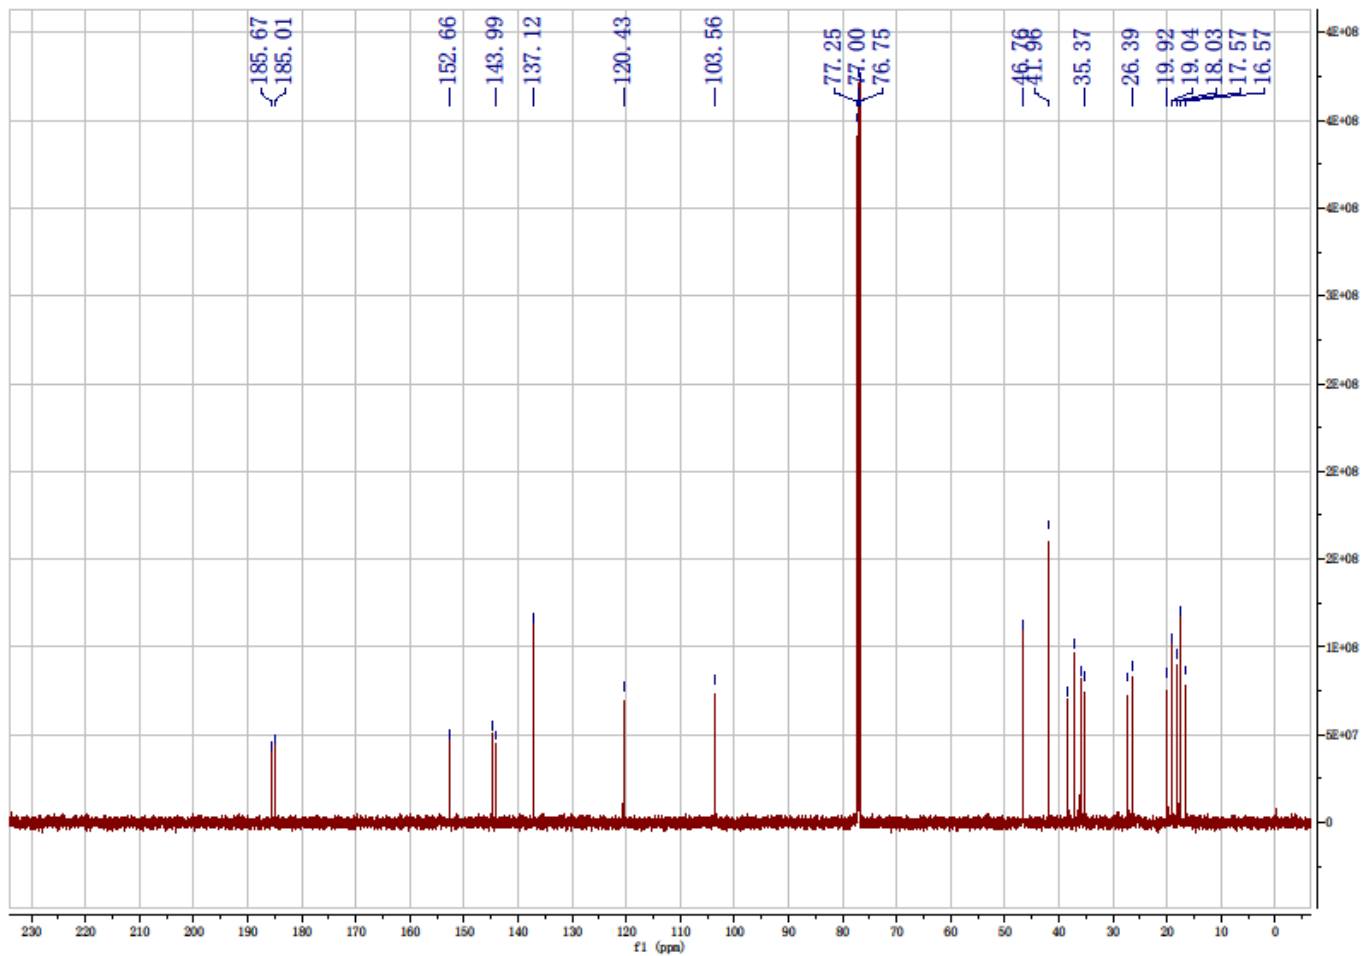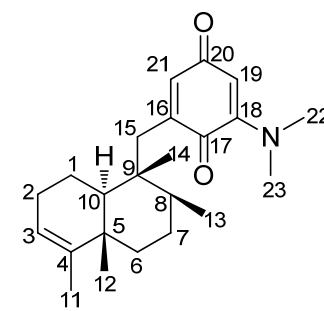

Dysidaminone C (3)

Figure S24.  $^{13}\text{C}$  NMR Spectrum of Dysidaminone C (3) in  $\text{CDCl}_3$ .

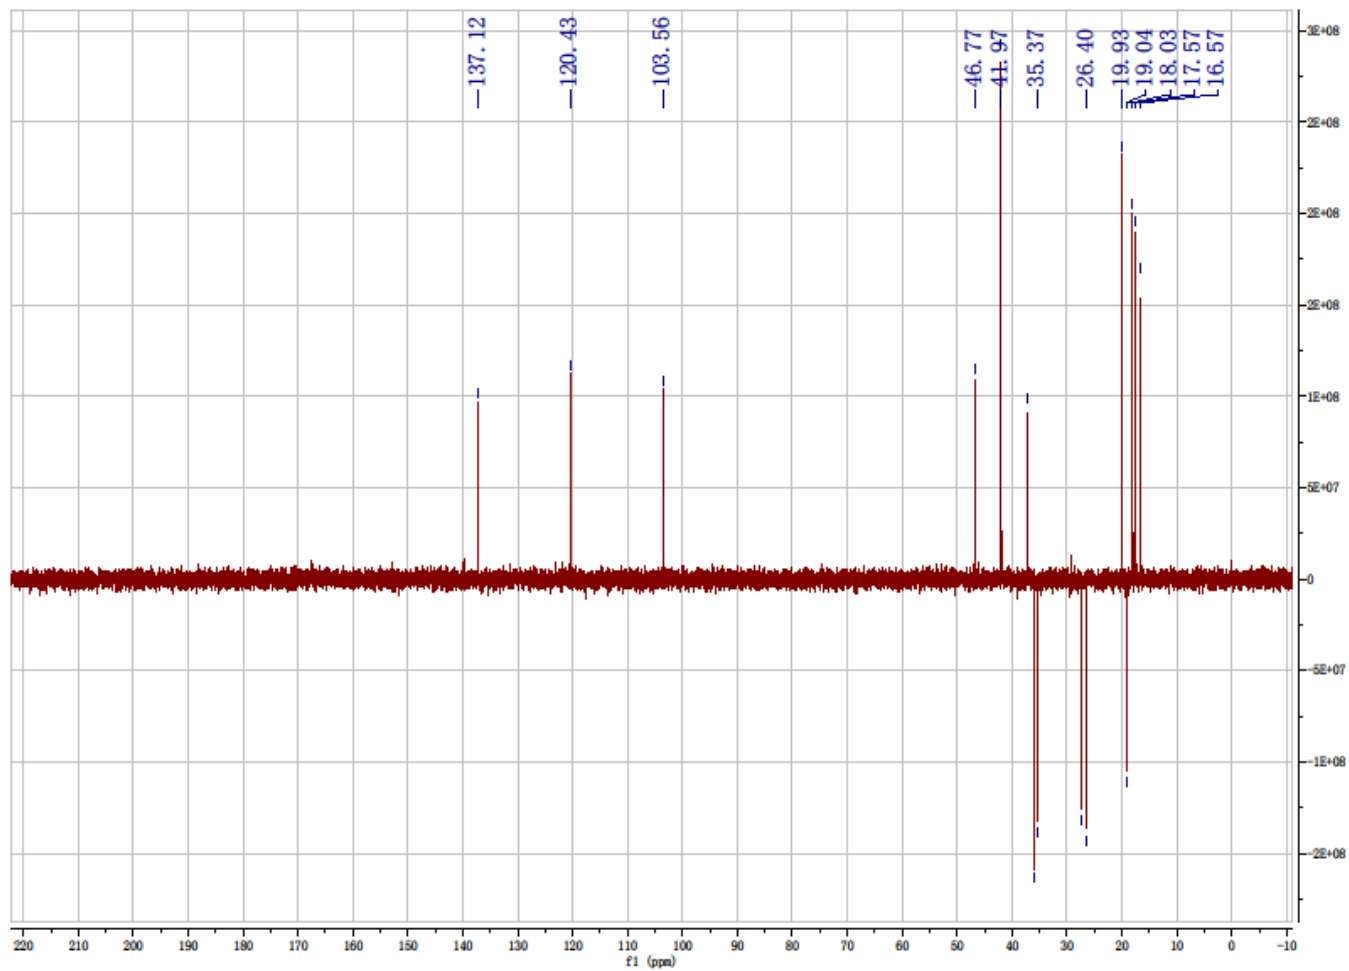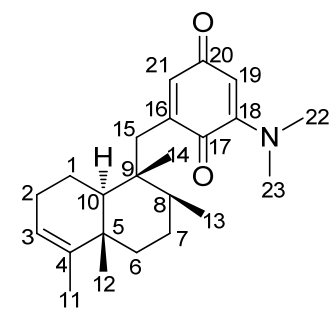

Dysidaminone C (**3**)

**Figure S25.** DEPT135 Spectrum of Dysidaminone C (**3**) in CDCl<sub>3</sub>.

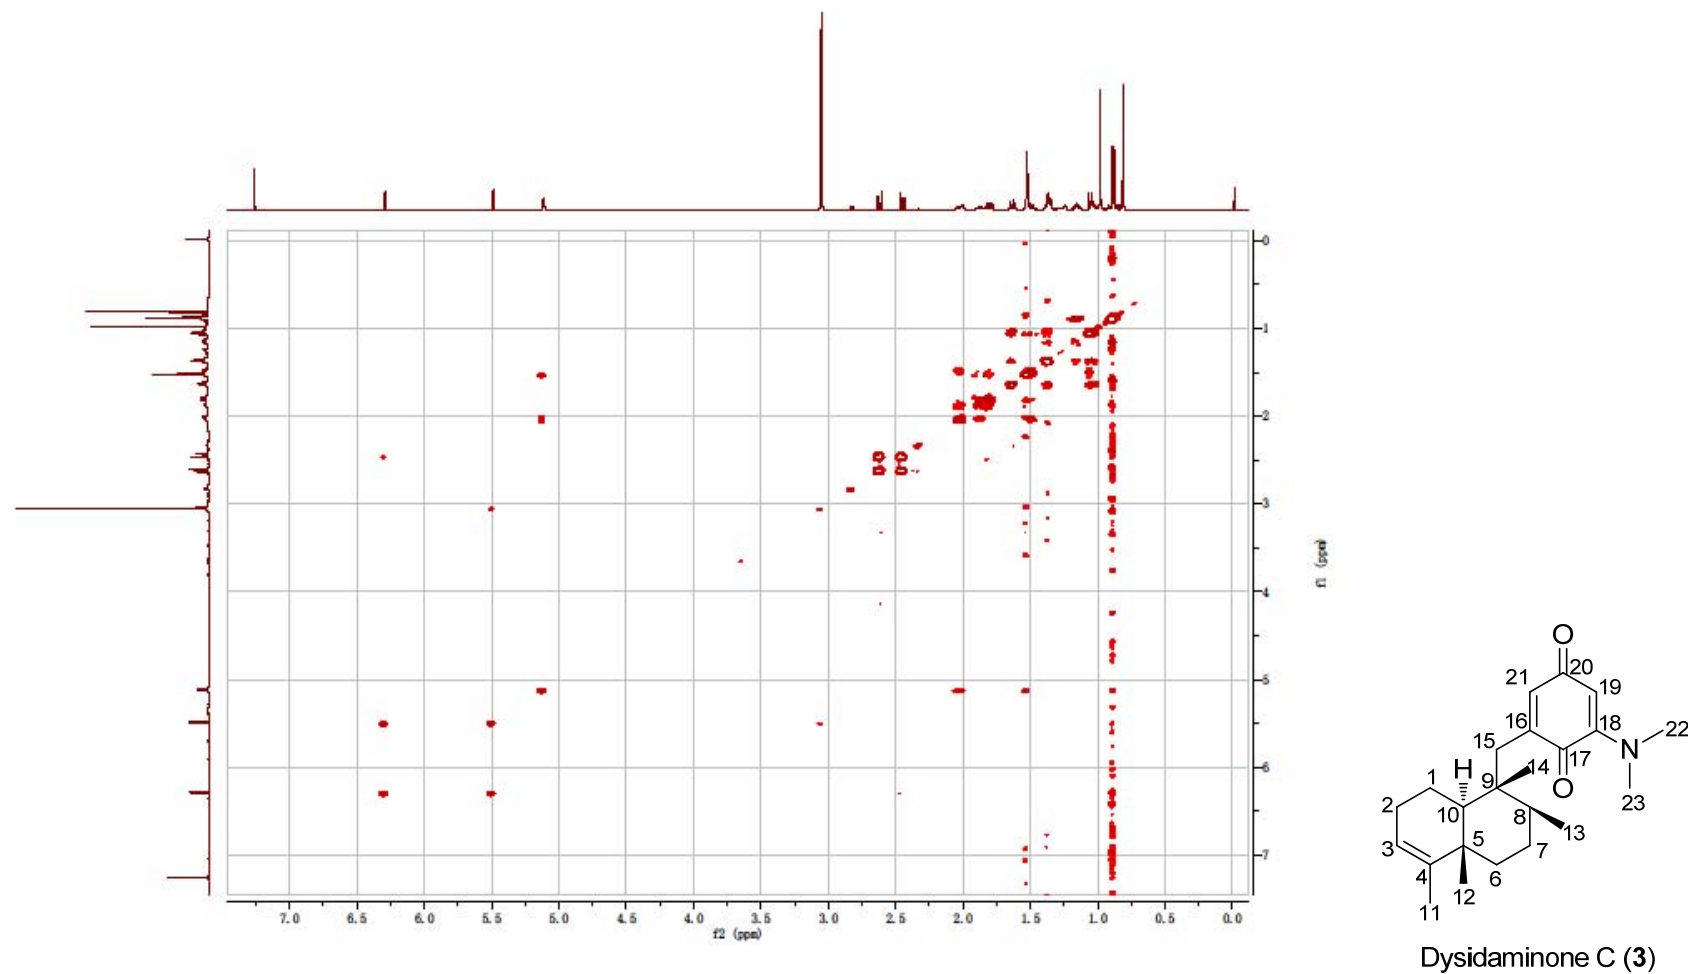

**Figure S26.**  $^1\text{H}$ - $^1\text{H}$  COSY Spectrum of Dysidaminone C (**3**) in  $\text{CDCl}_3$ .



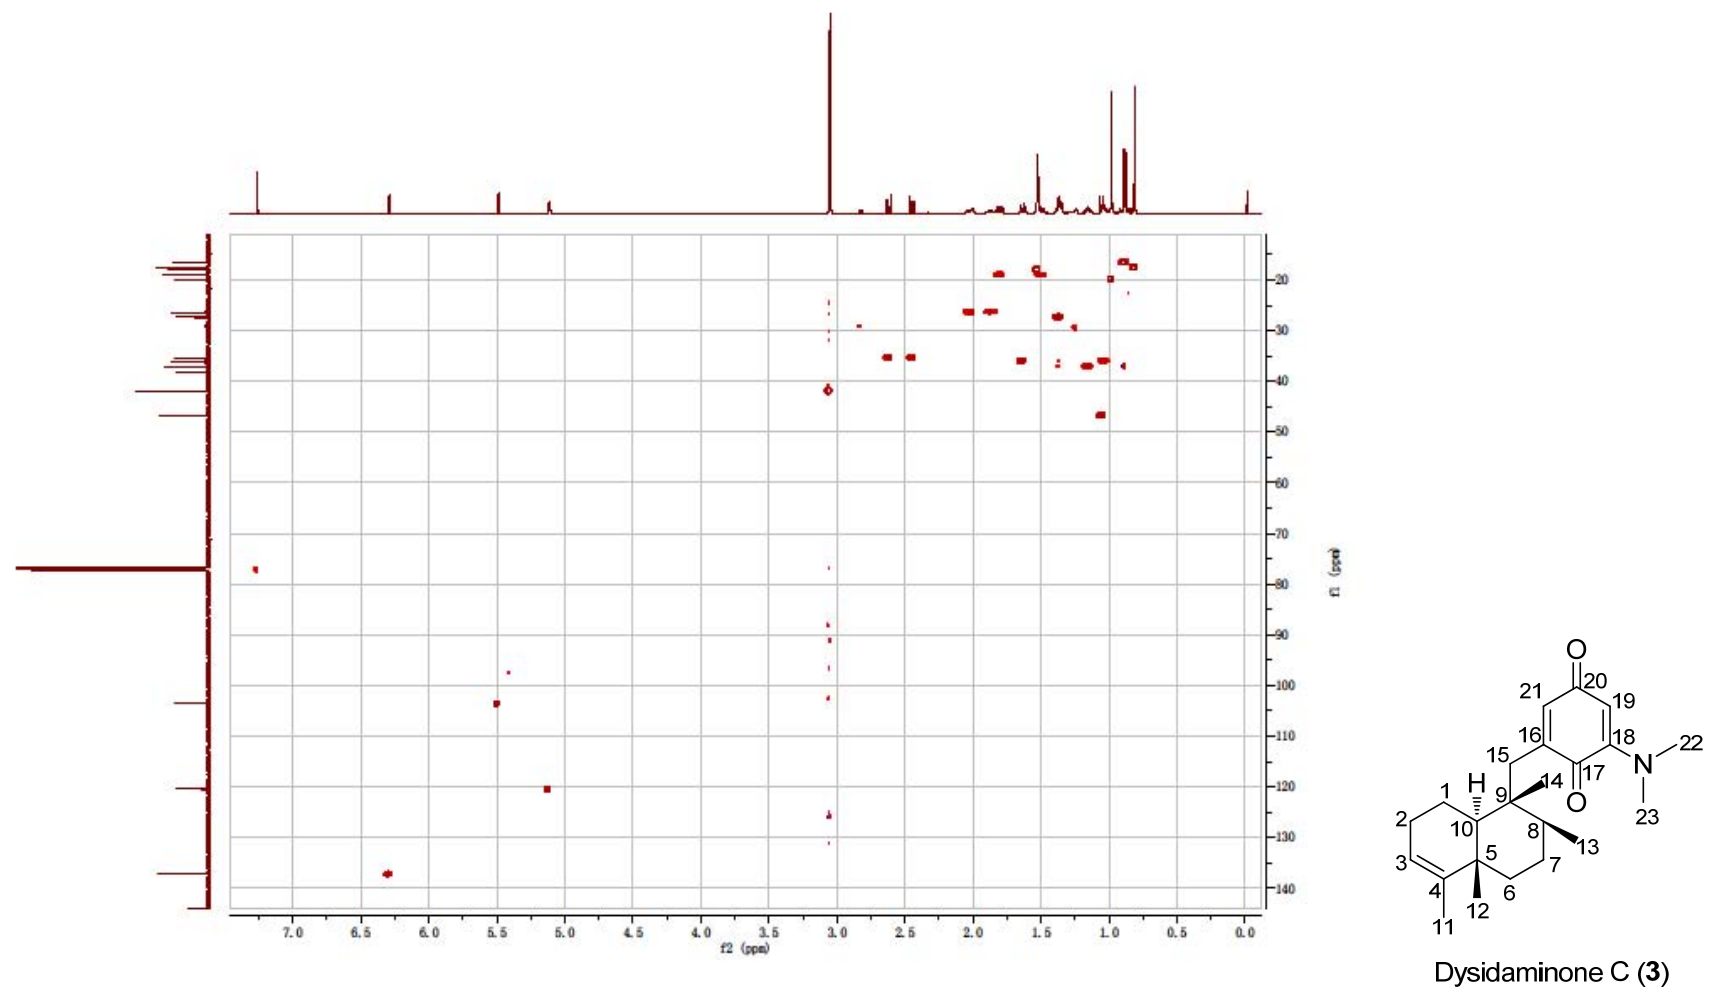

**Figure S27.** HSQC Spectrum of Dysidaminone C (**3**) in CDCl<sub>3</sub>.

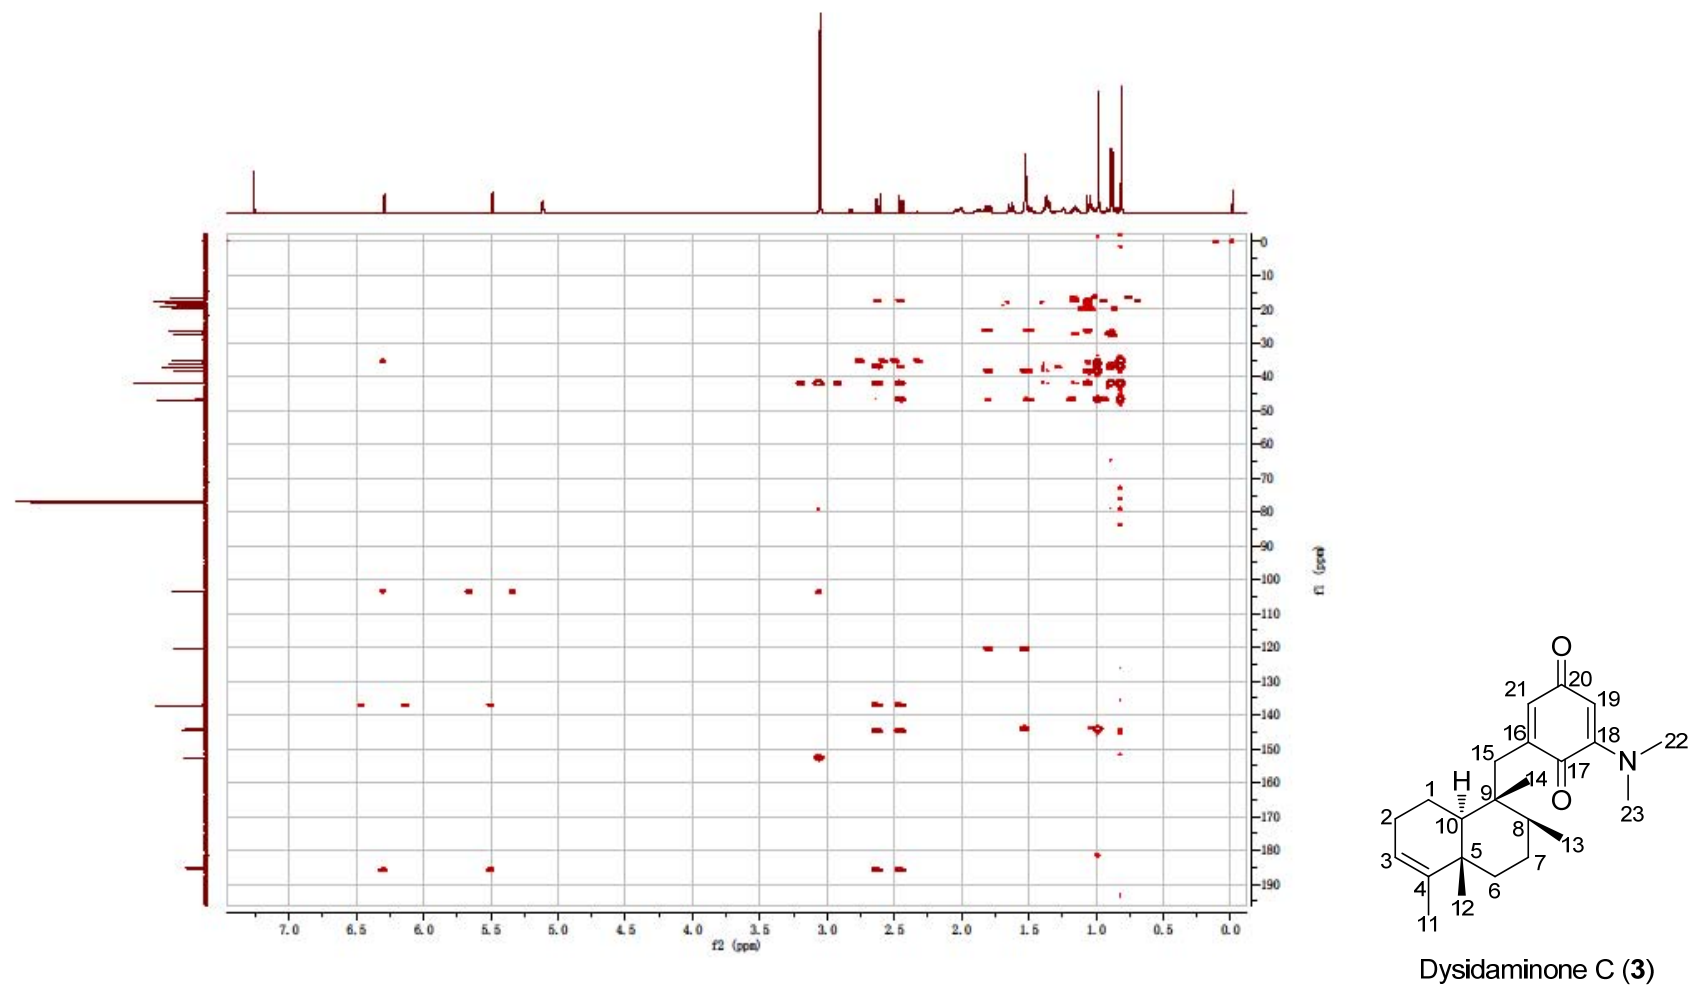

**Figure S28.** HMBC Spectrum of Dysidaminone C (**3**) in CDCl<sub>3</sub>.

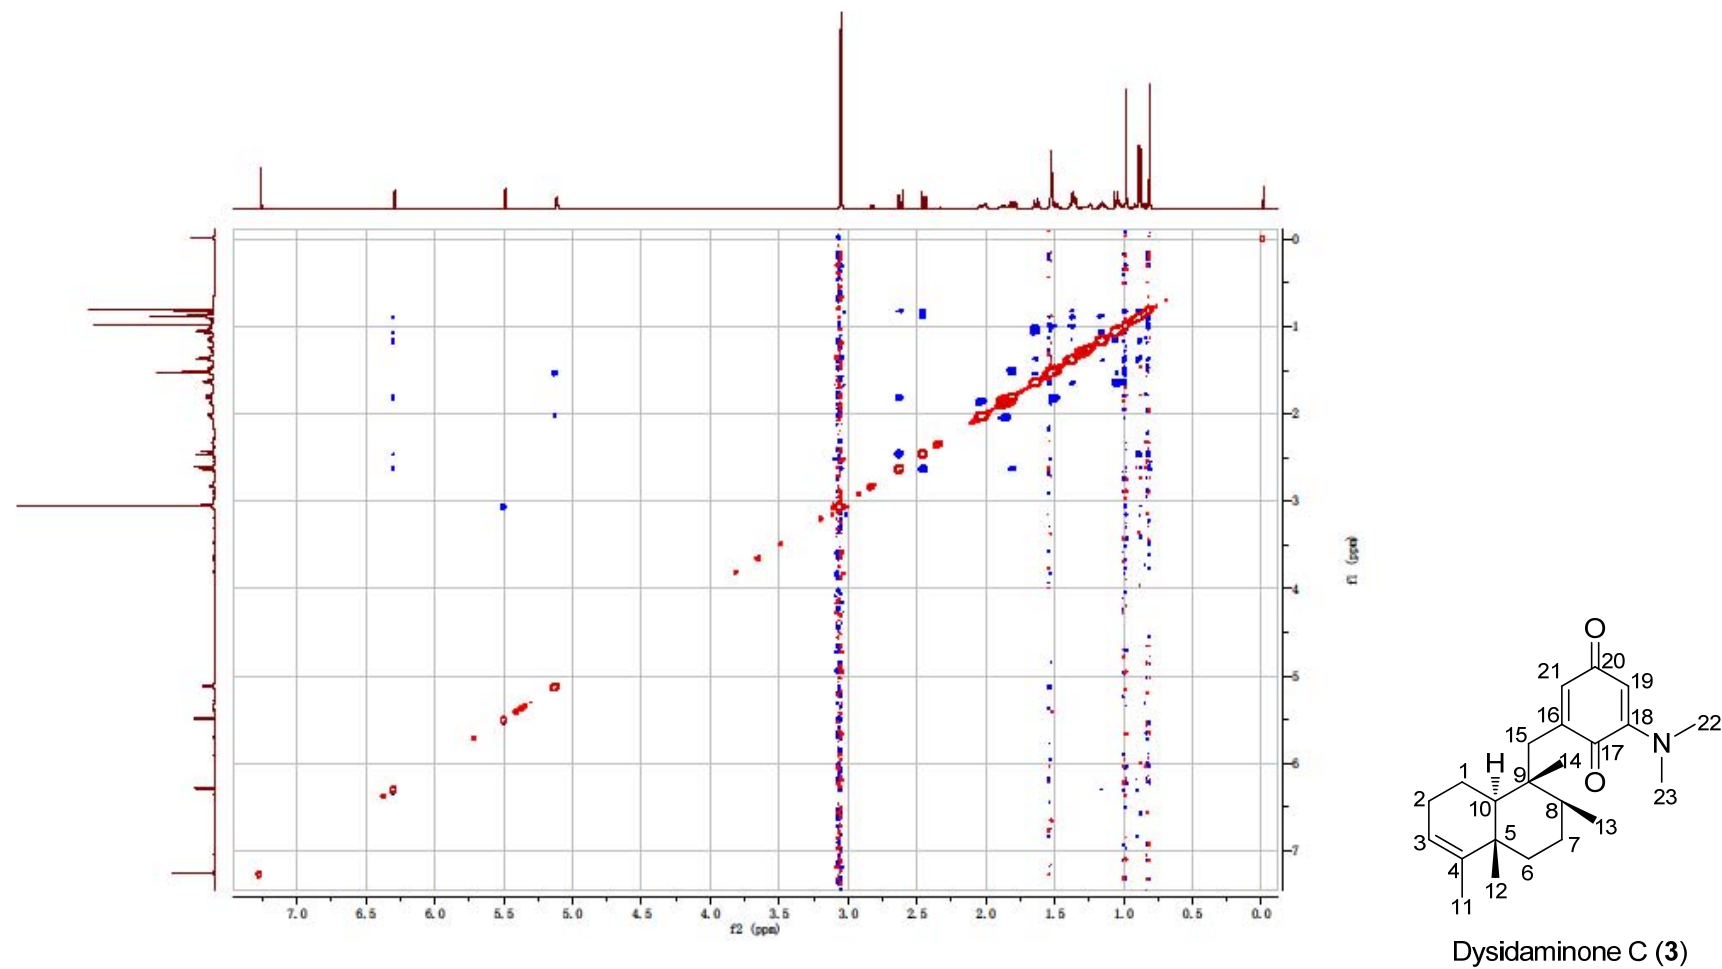

**Figure S29.** NOESY Spectrum of Dysidaminone C (3) in CDCl<sub>3</sub>.

## Elemental Composition Report

Page 1

Tolerance = 5.0 PPM / DBE: min = -1.5, max = 50.0

Selected filters: None

Monoisotopic Mass, Even Electron Ions

11 formula(e) evaluated with 1 results within limits (up to 50 closest results for each mass)

Elements Used:

C: 10-27 H: 10-40 N: 1-1 O: 1-4

SIPI

XT-38 M.W.=355

WQ13-097H3 16 (0.564) AM (Cen,4, 80.00, Ar,5000.0,340.15,0.70); Sm (SG, 2x3.00); Cm (14:26)

Q-Tof micro

YA019

29-Apr-2013, 15:12:33

TOF MS ES+  
4.29e3

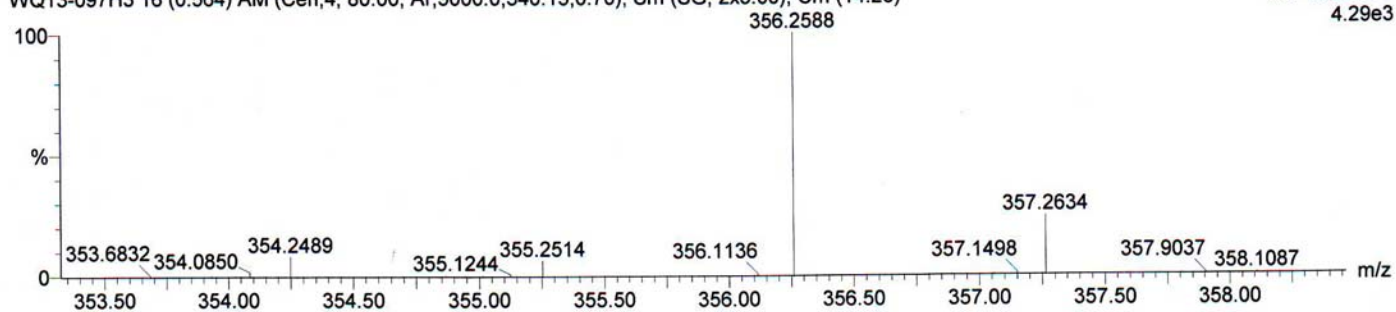

|          |        |            |      |      |      |           |              |
|----------|--------|------------|------|------|------|-----------|--------------|
| Minimum: | 40.00  |            |      |      | -1.5 |           |              |
| Maximum: | 100.00 |            | 5.0  | 5.0  | 50.0 |           |              |
| Mass     | RA     | Calc. Mass | mDa  | PPM  | DBE  | i-FIT     | Formula      |
| 356.2588 | 100.00 | 356.2590   | -0.2 | -0.6 | 7.5  | 2775182.8 | C23 H34 N O2 |

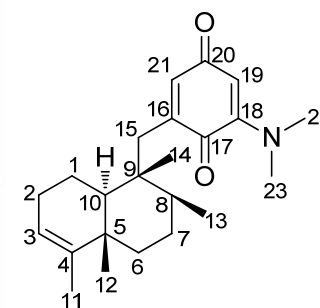

Dysidaminone C (3)

Figure S30. HRESIMS of Dysidaminone C (3).

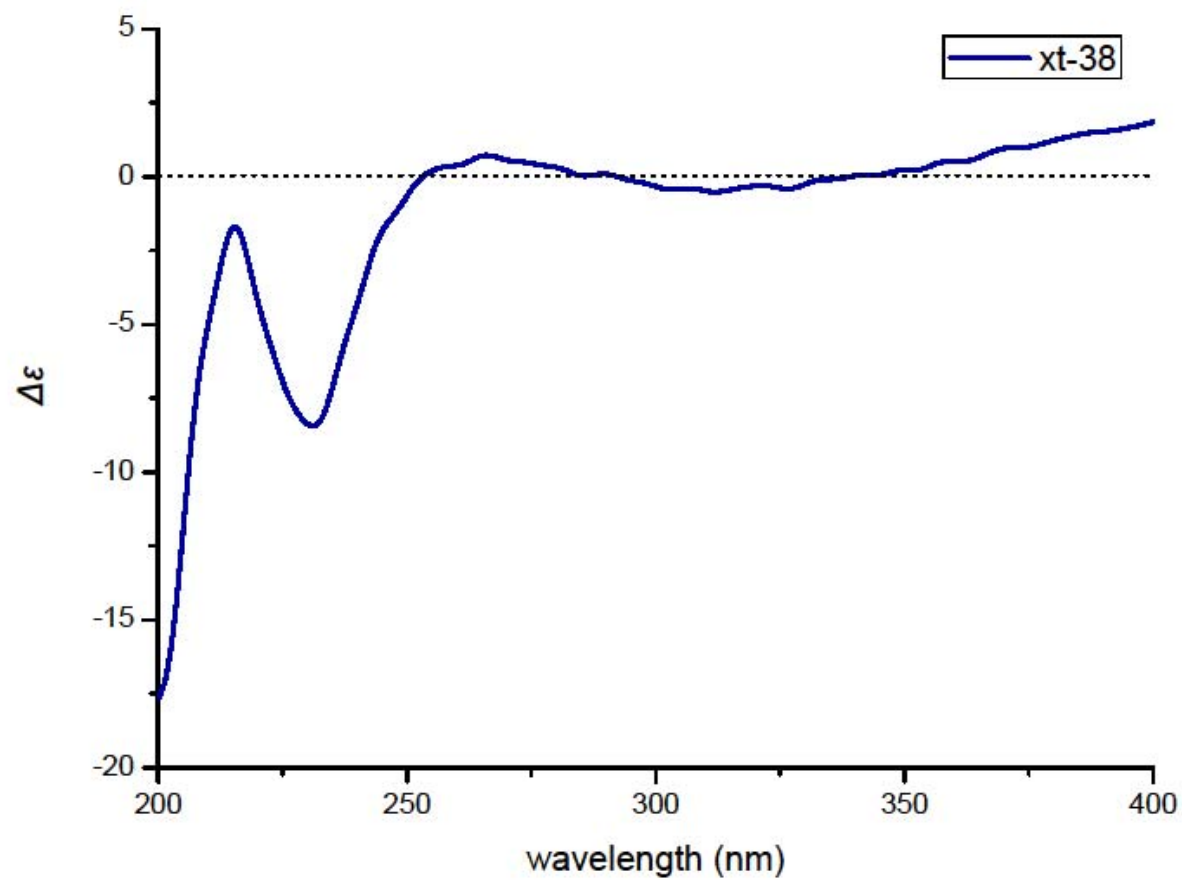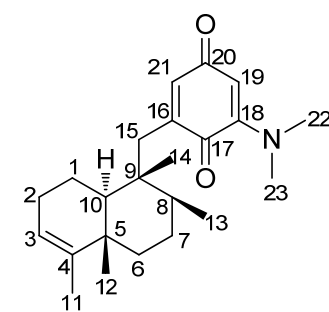

Dysidaminone C (**3**)

**Figure S31.** CD Spectrum of Dysidaminone C (**3**) in MeOH.

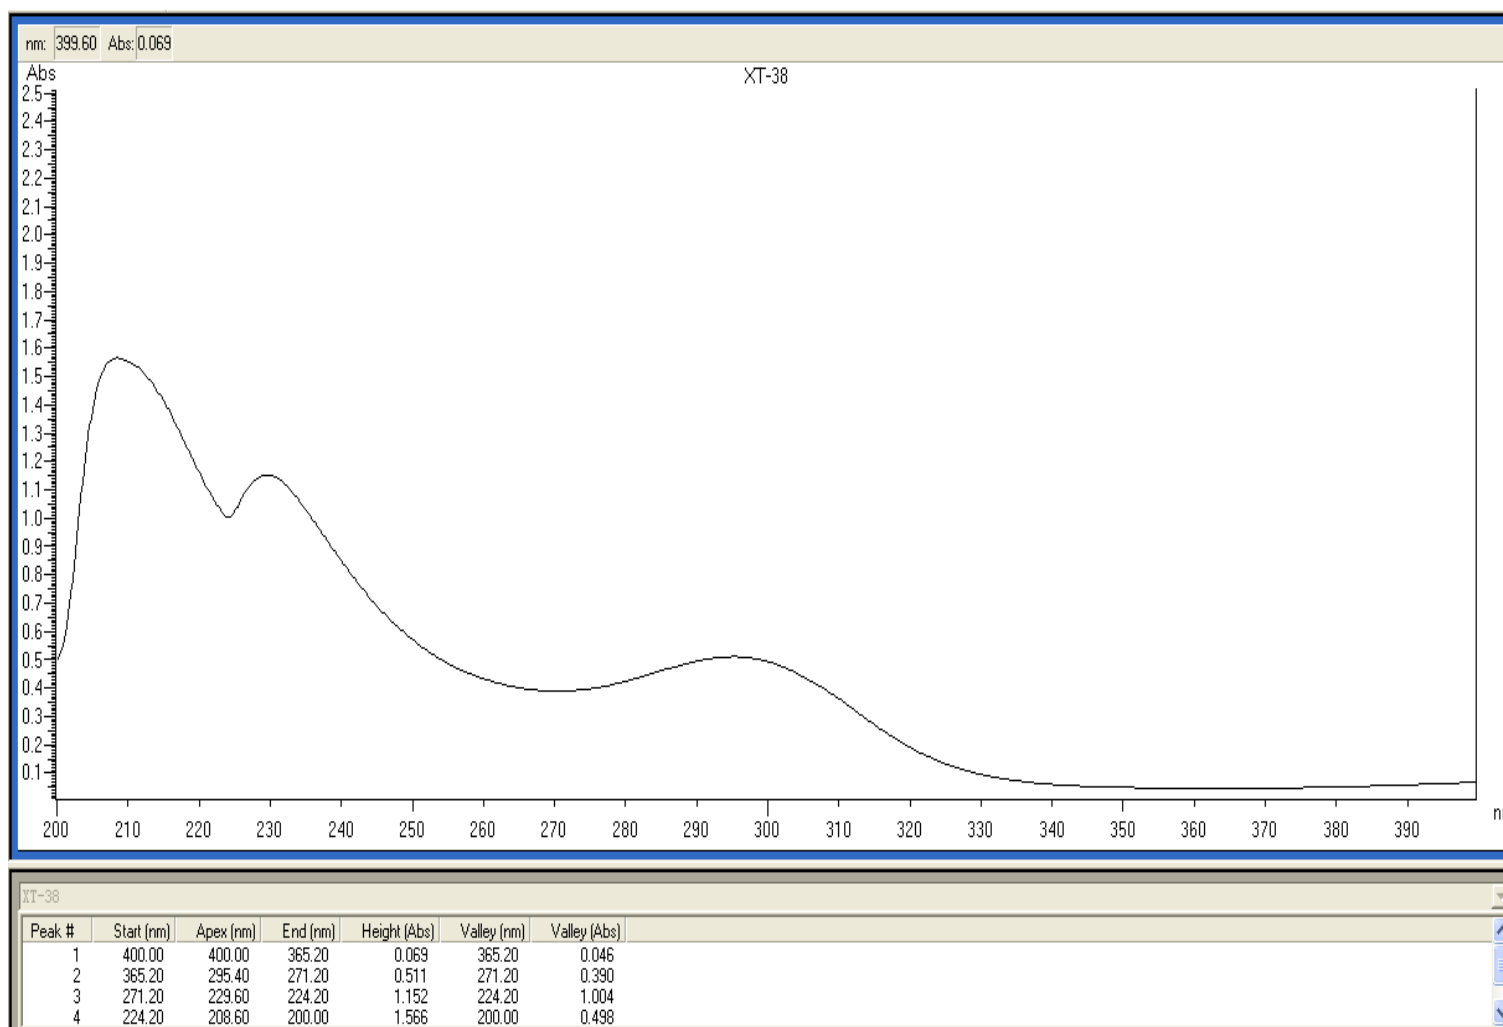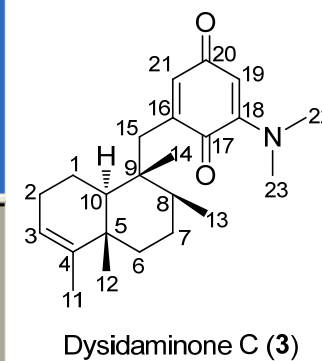

Figure S32. UV Spectrum of Dysidaminone C (3) in MeOH.

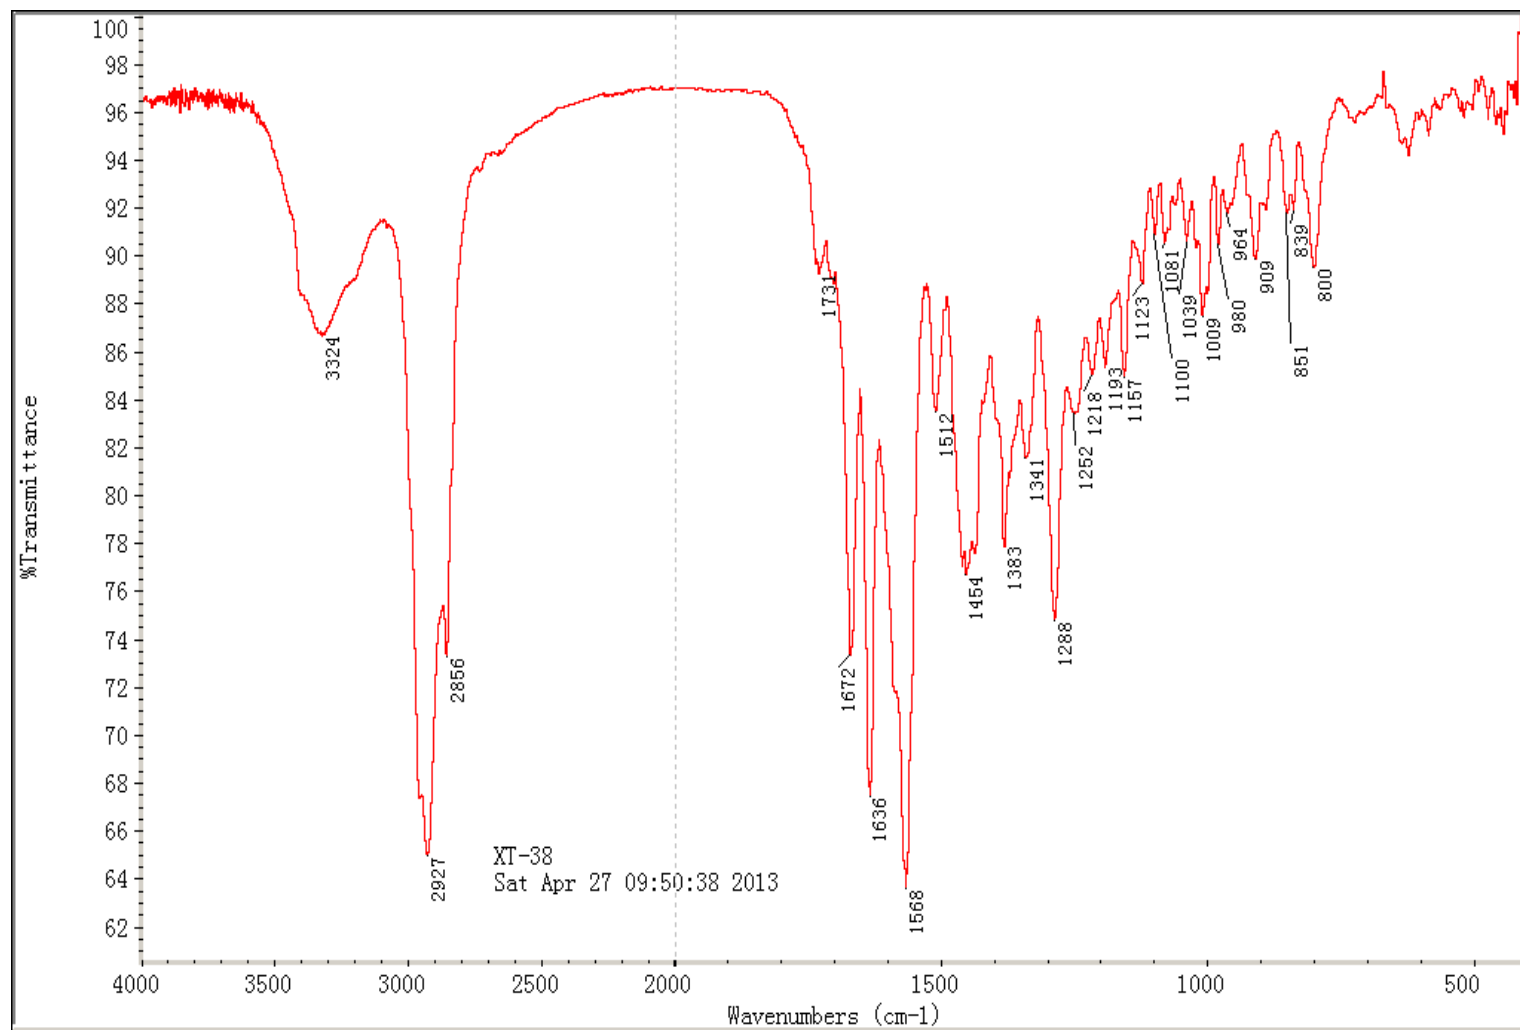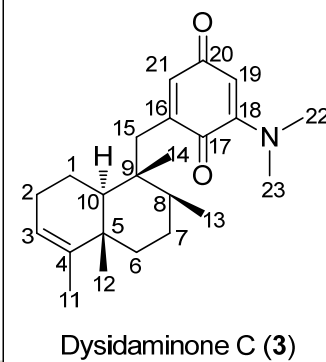

**Figure S33.** IR Spectrum of Dysidaminone C (3).

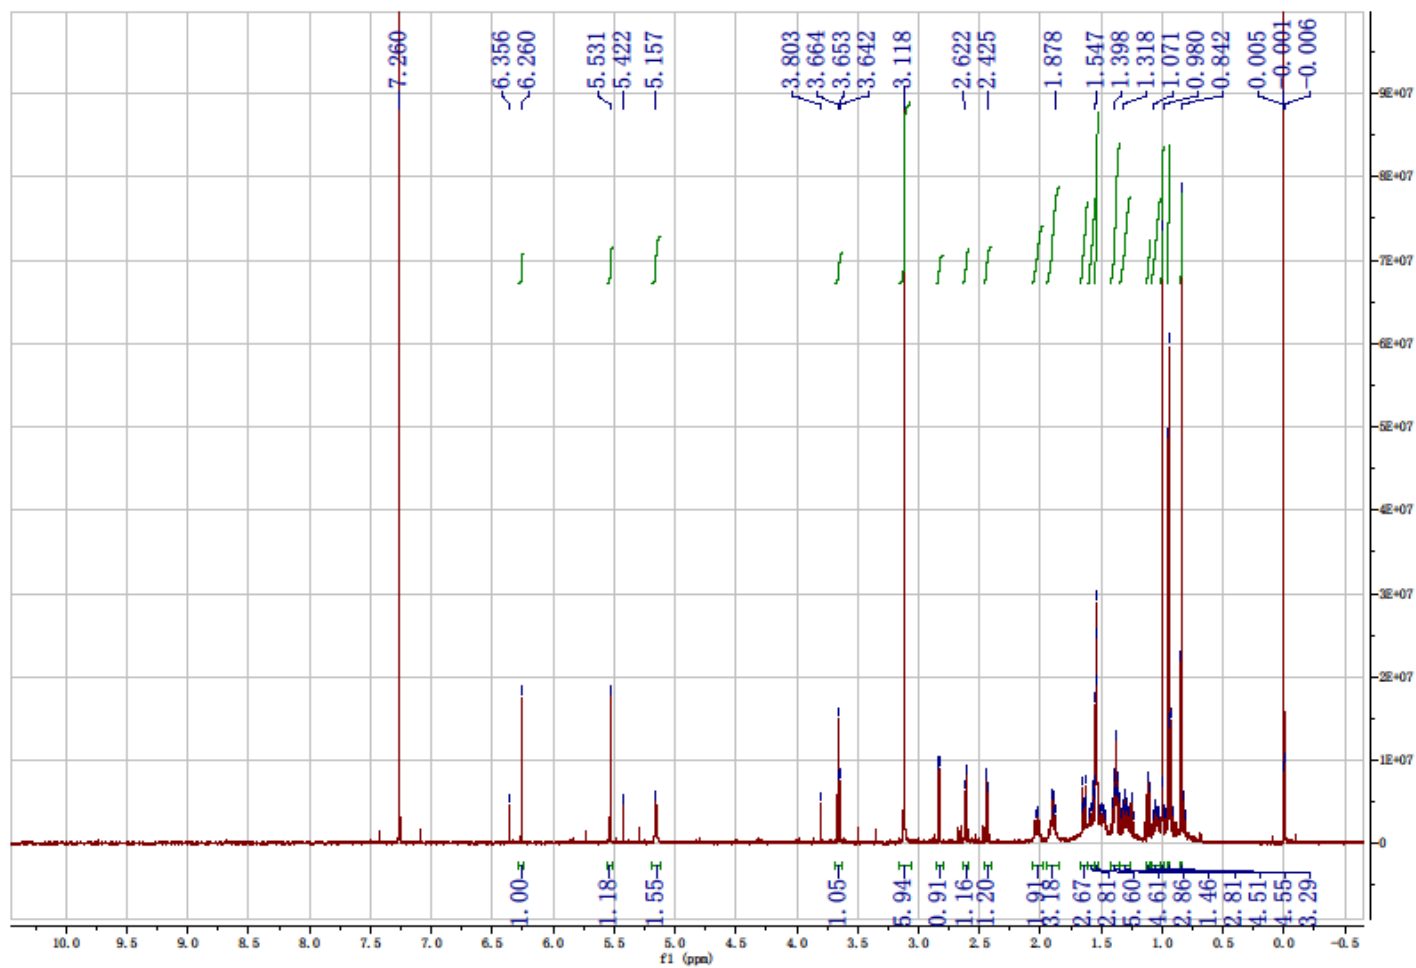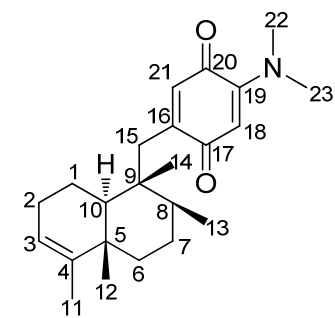

Dysidaminone D (4)

Figure S34.  $^1\text{H}$  NMR Spectrum of Dysidaminone D (4) in  $\text{CDCl}_3$ .



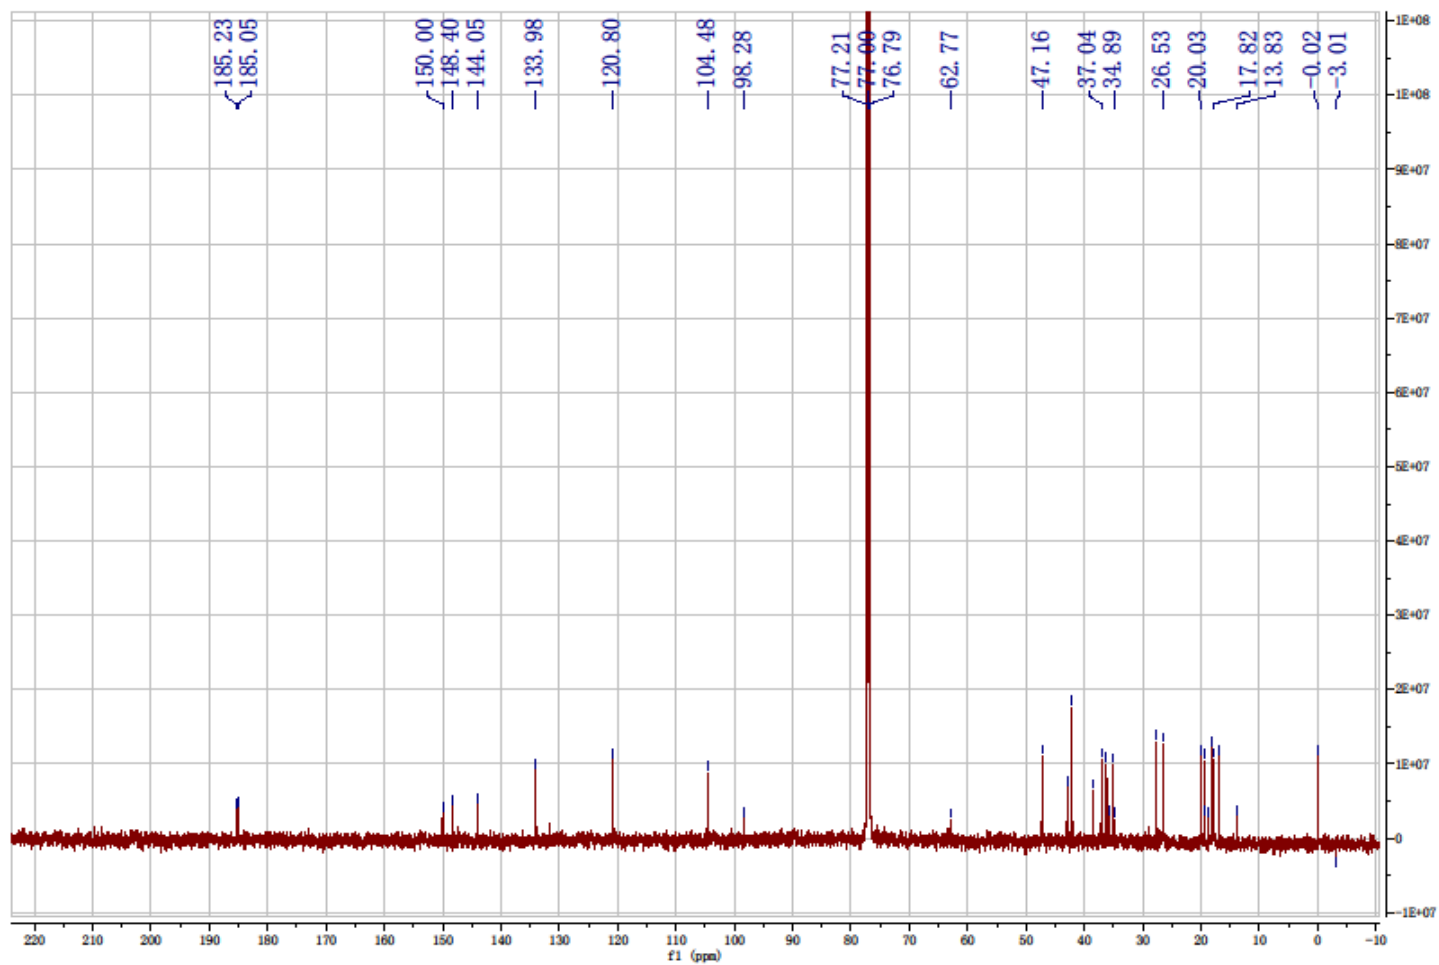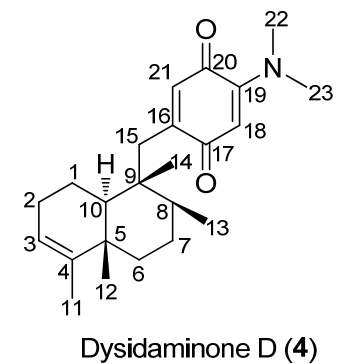

Figure S35.  $^{13}\text{C}$  NMR Spectrum of Dysidaminone D (4) in  $\text{CDCl}_3$ .

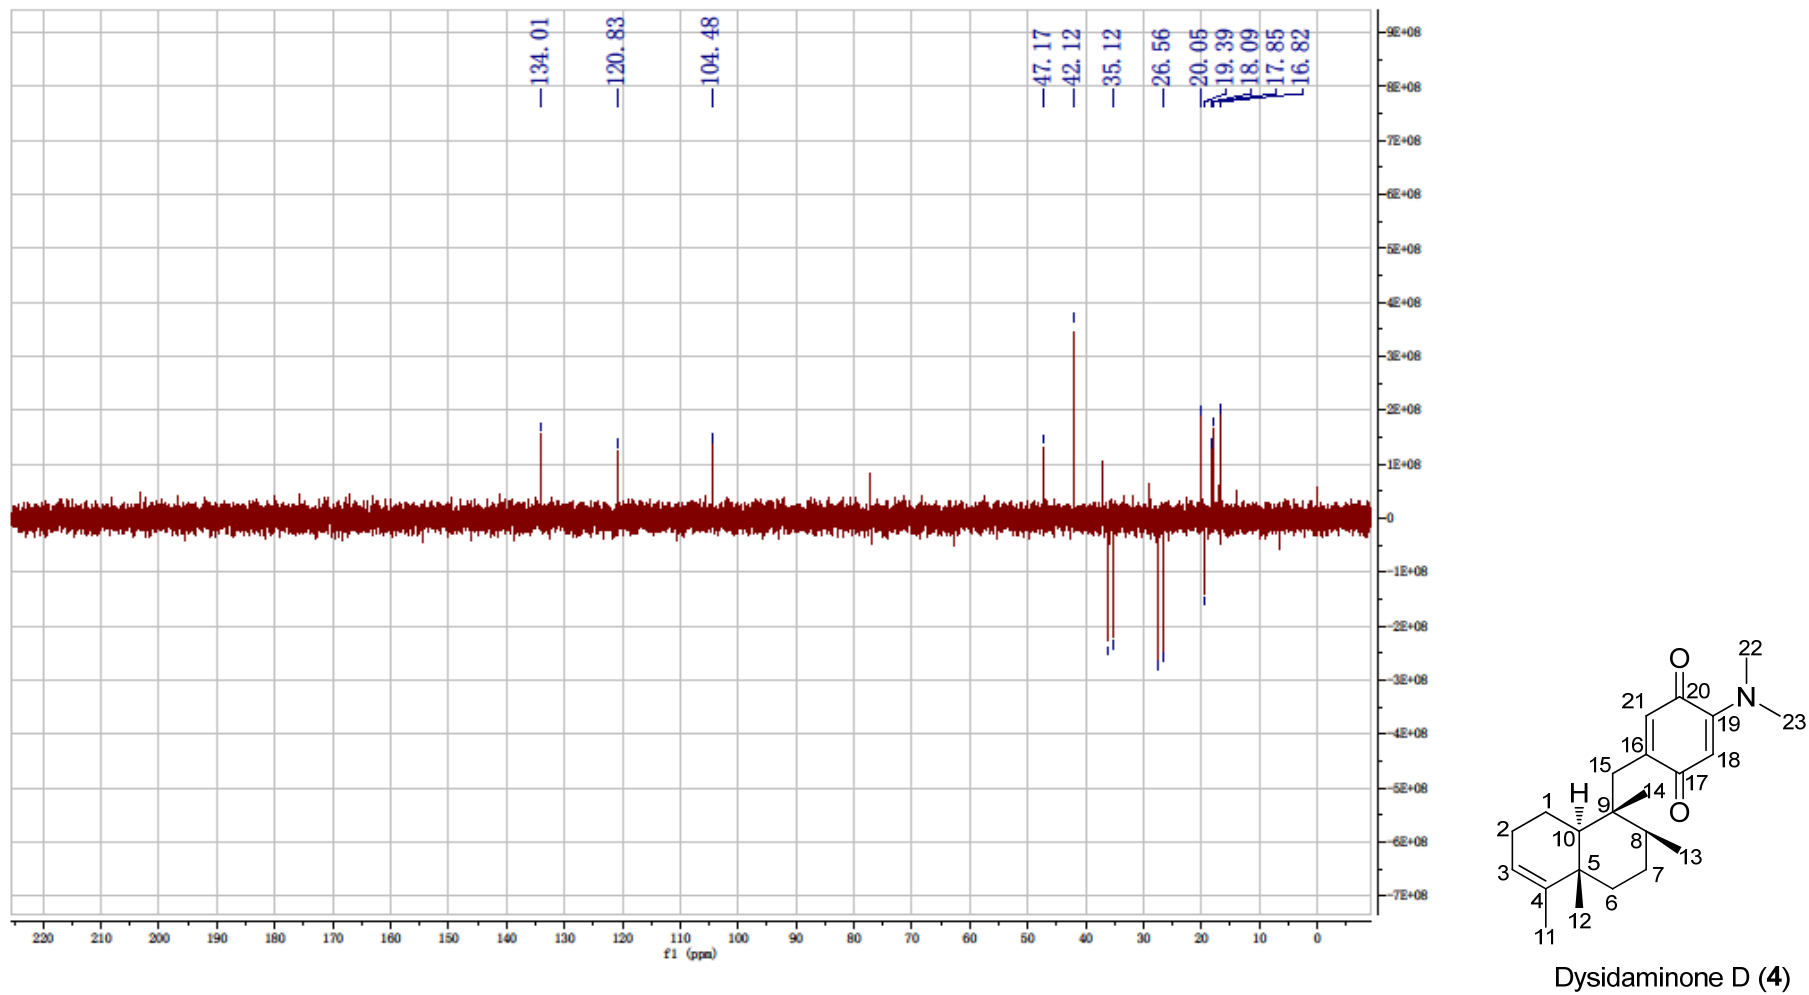

**Figure S36.** DEPT135 Spectrum of Dysidaminone D (4) in CDCl<sub>3</sub>.

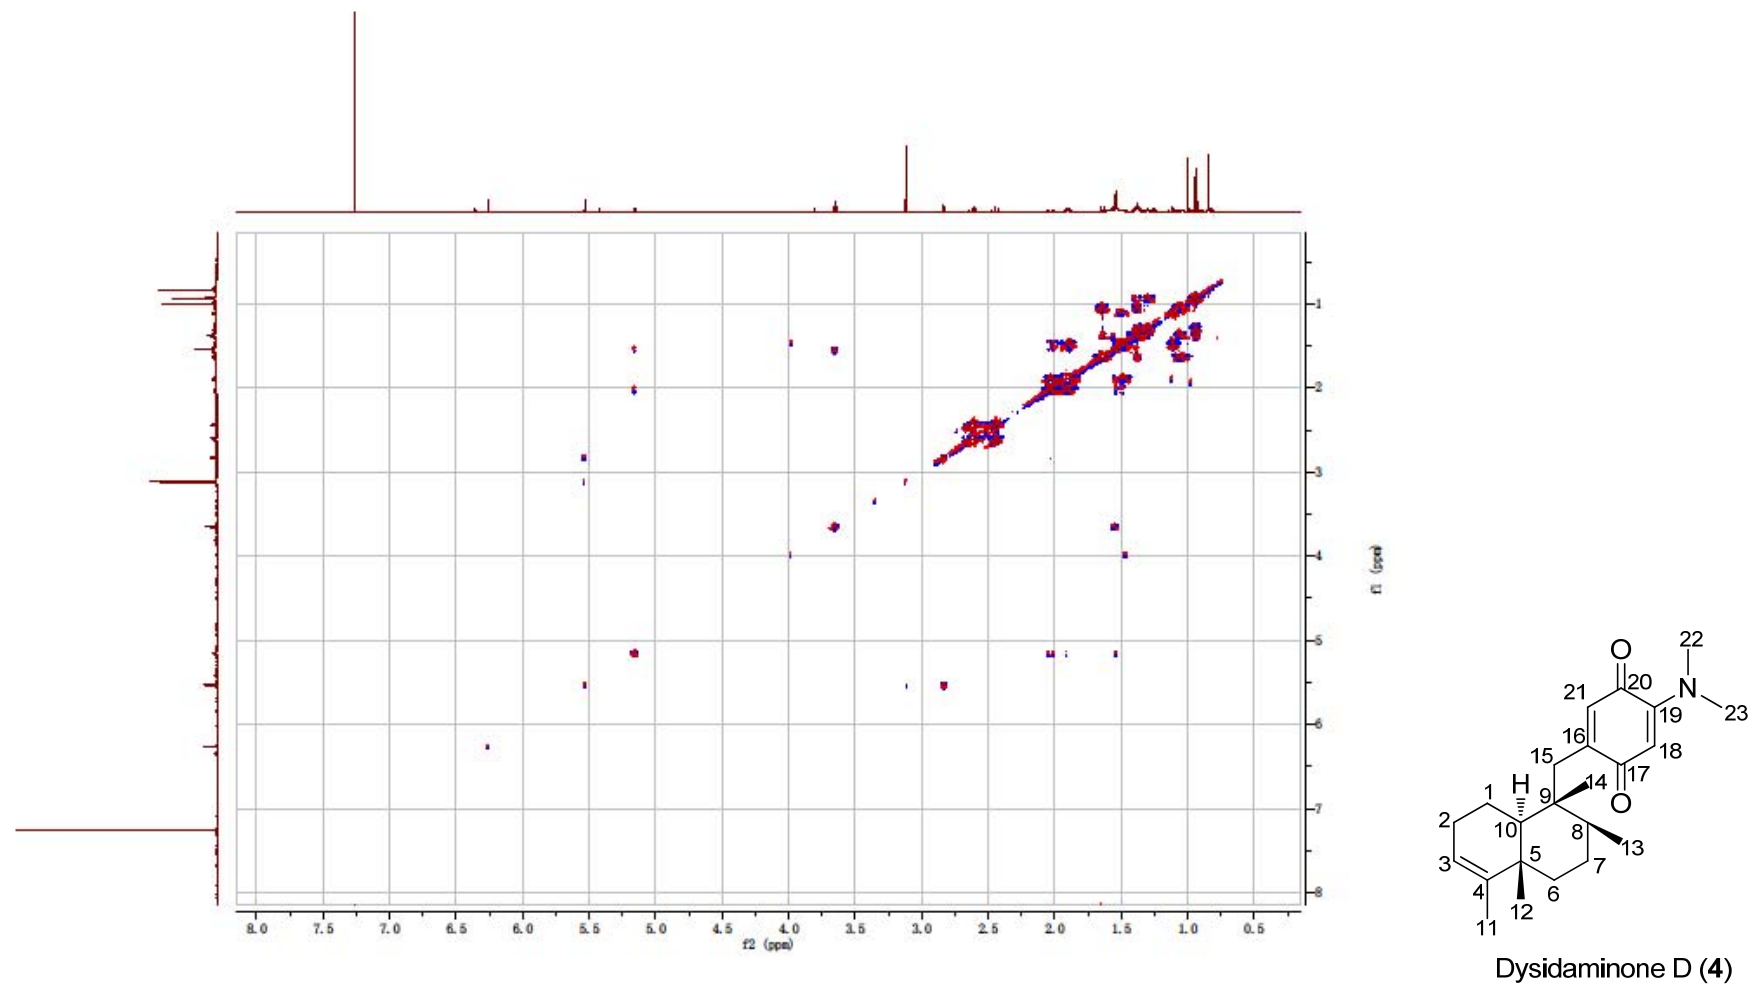

**Figure S37.**  $^1\text{H}$ - $^1\text{H}$  COSY Spectrum of Dysidaminone D (4) in  $\text{CDCl}_3$ .

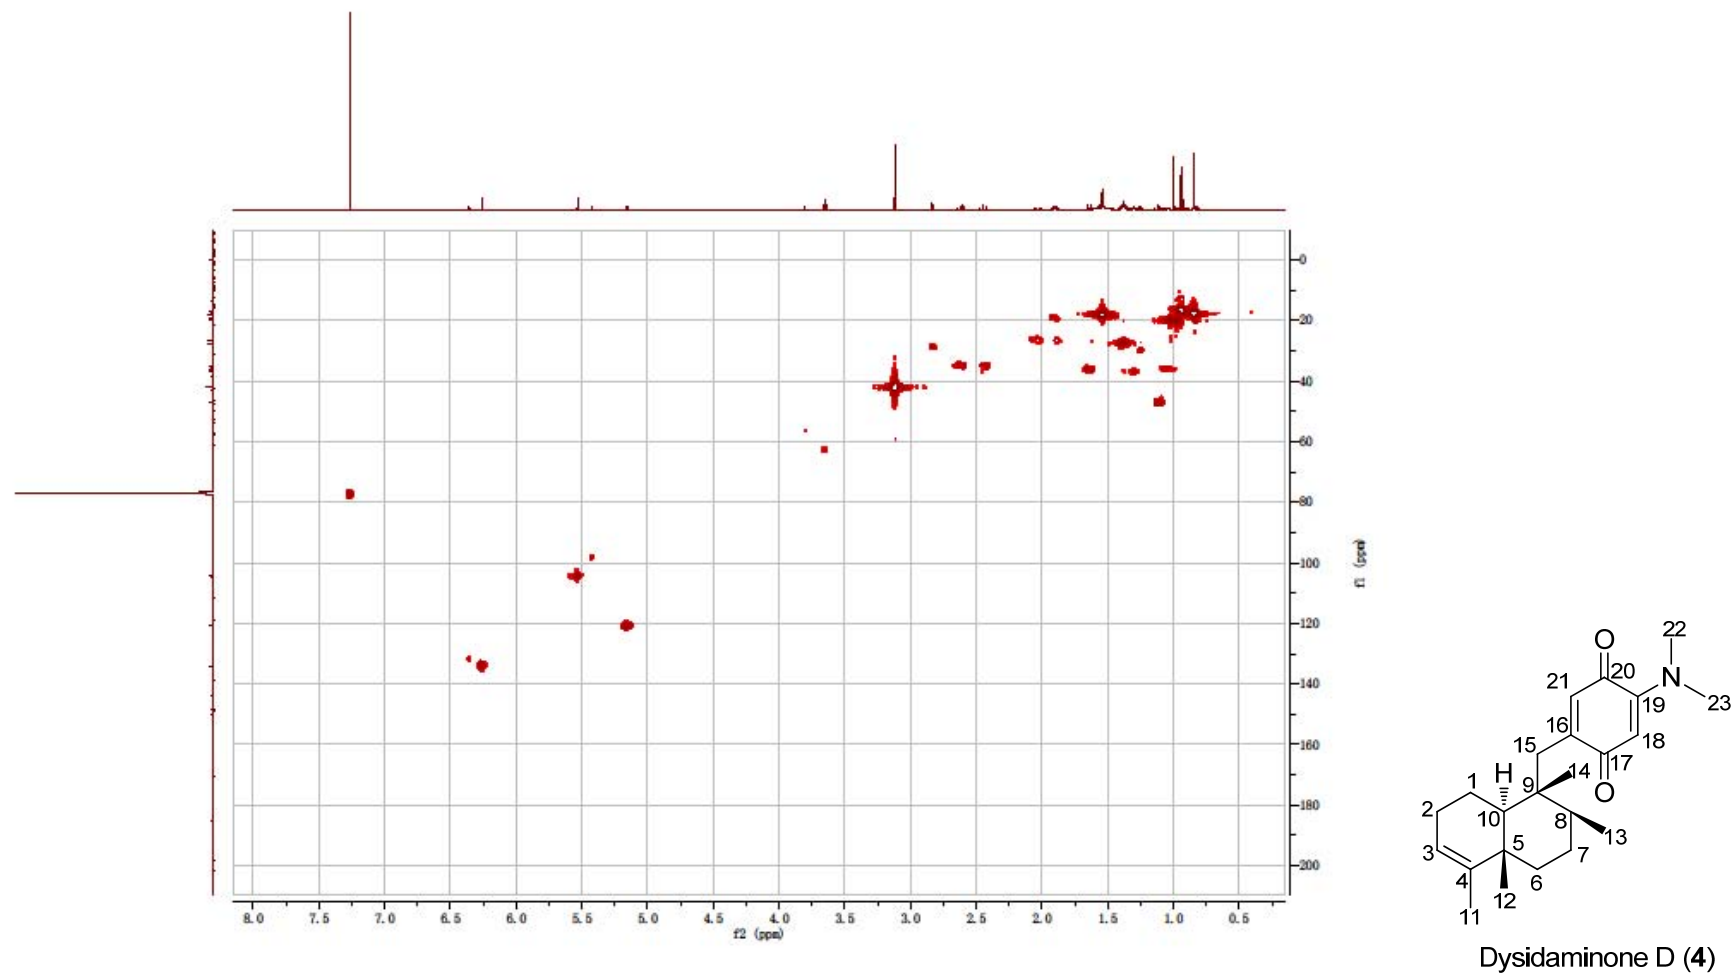

**Figure S38.** HSQC Spectrum of Dysidaminone D (**4**) in CDCl<sub>3</sub>.

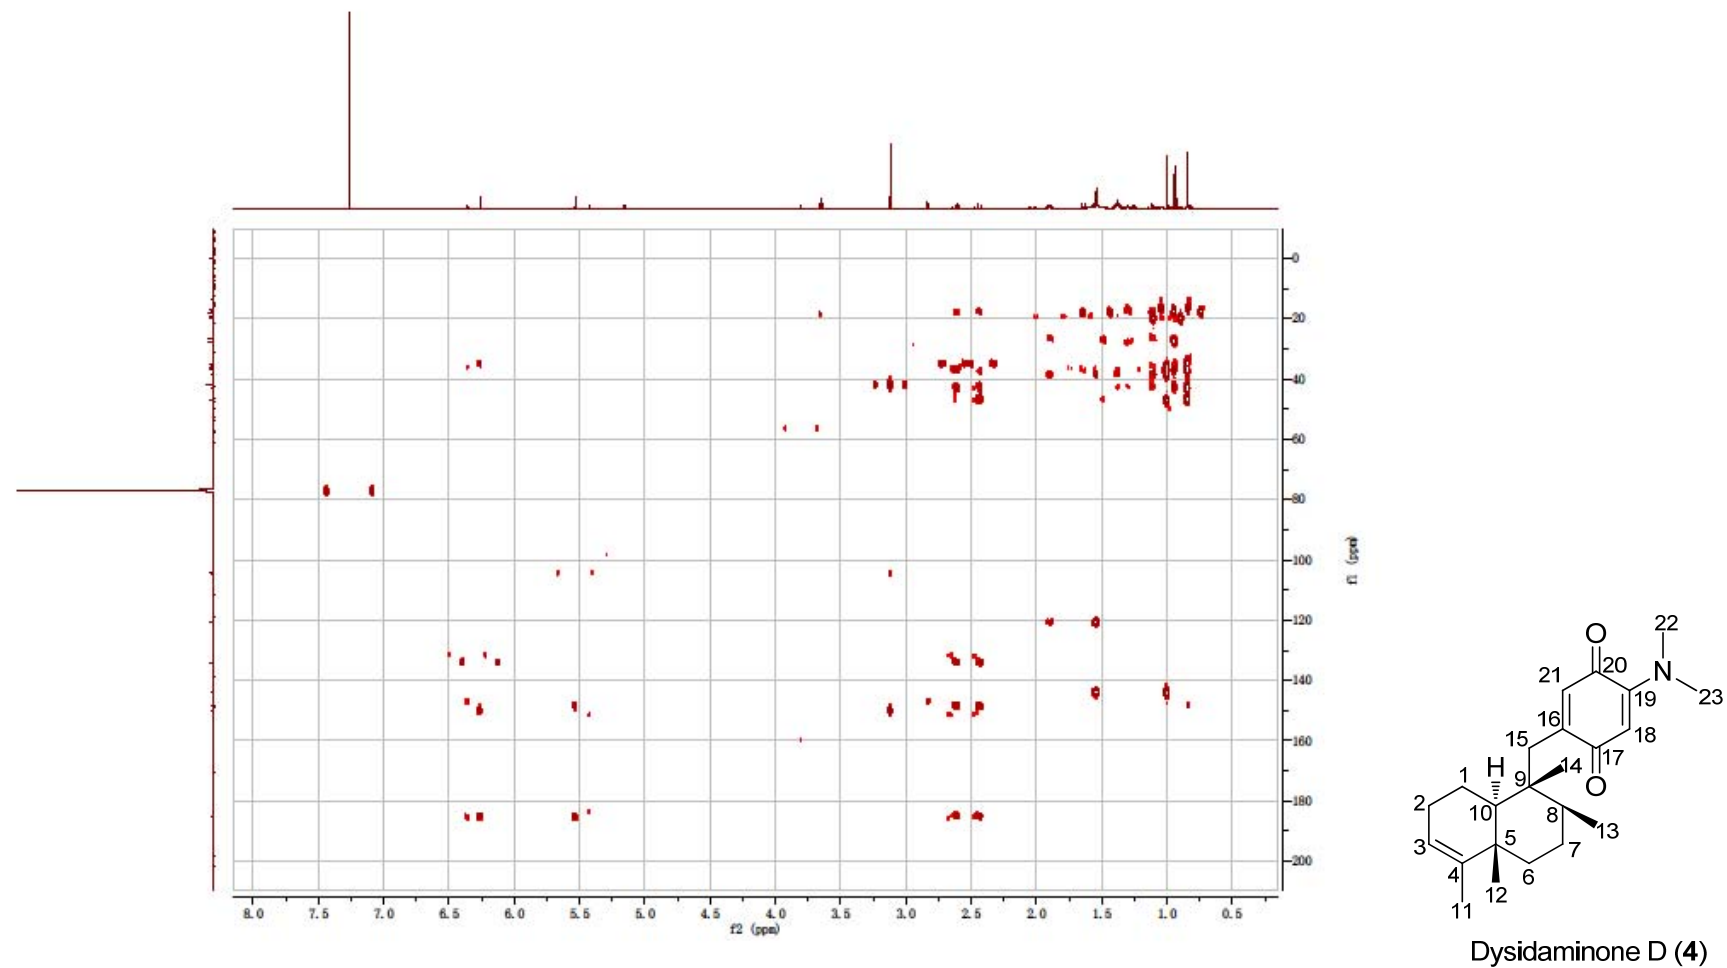

**Figure S39.** HMBC Spectrum of Dysidaminone D (4) in CDCl<sub>3</sub>.

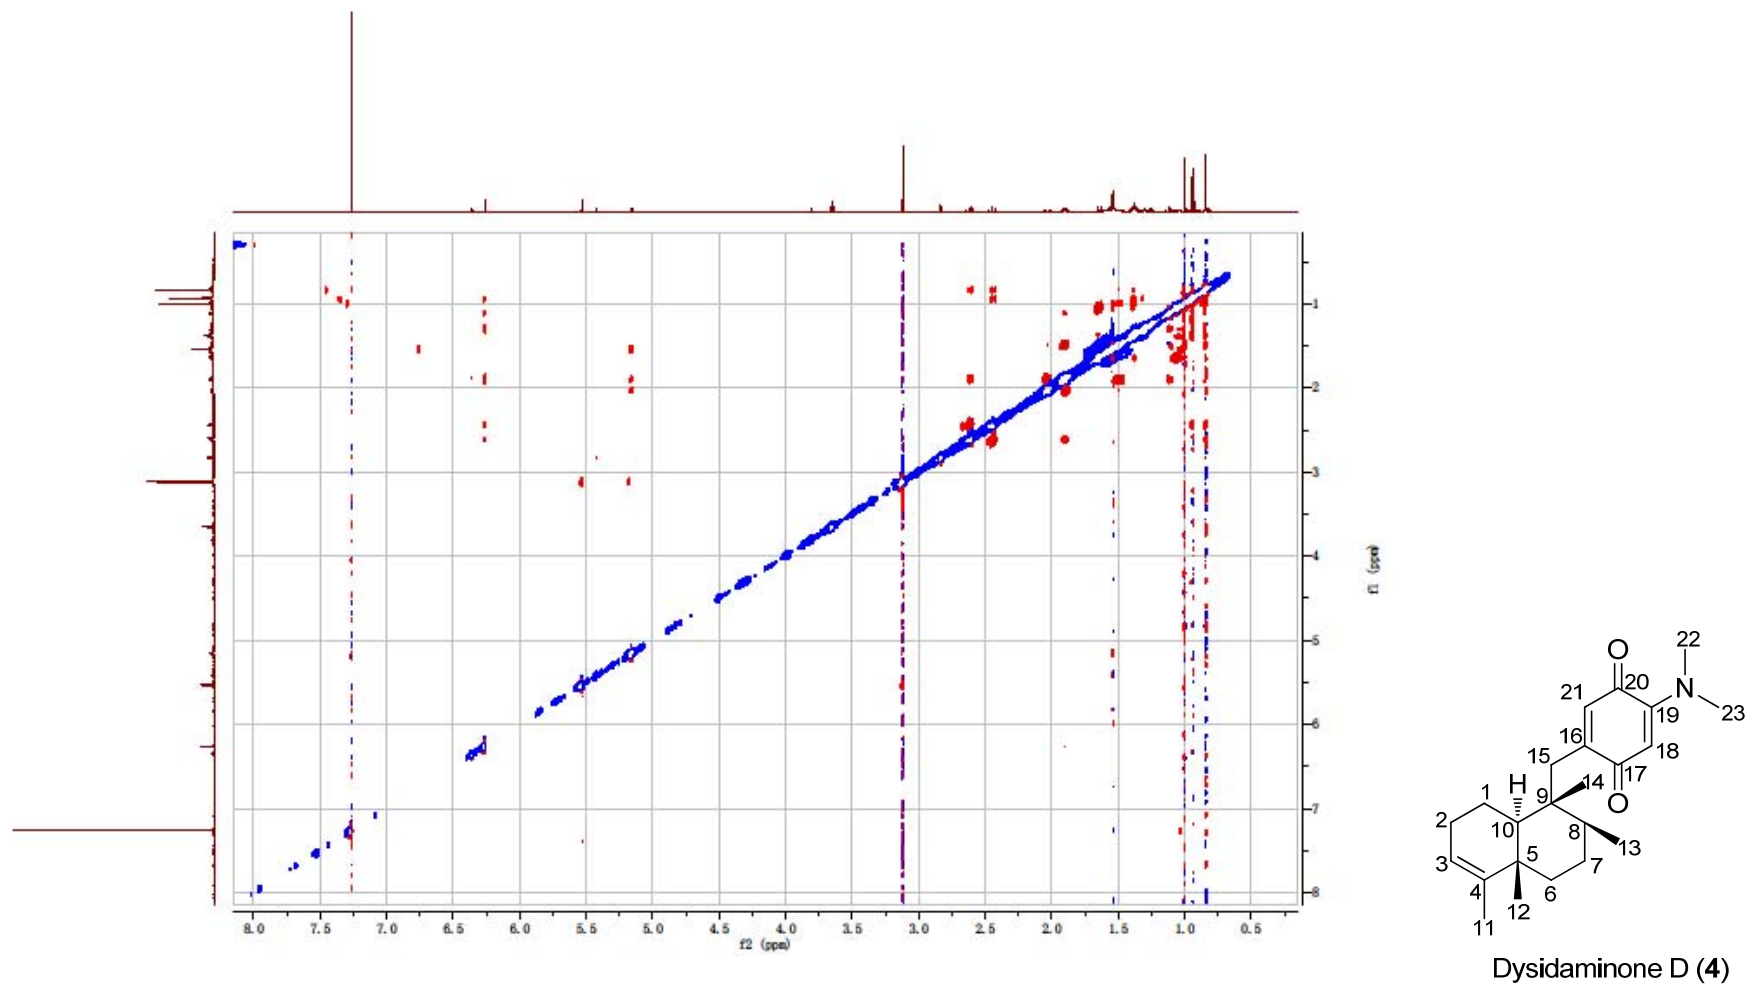

**Figure S40.** NOESY Spectrum of Dysidaminone D (4) in CDCl<sub>3</sub>.

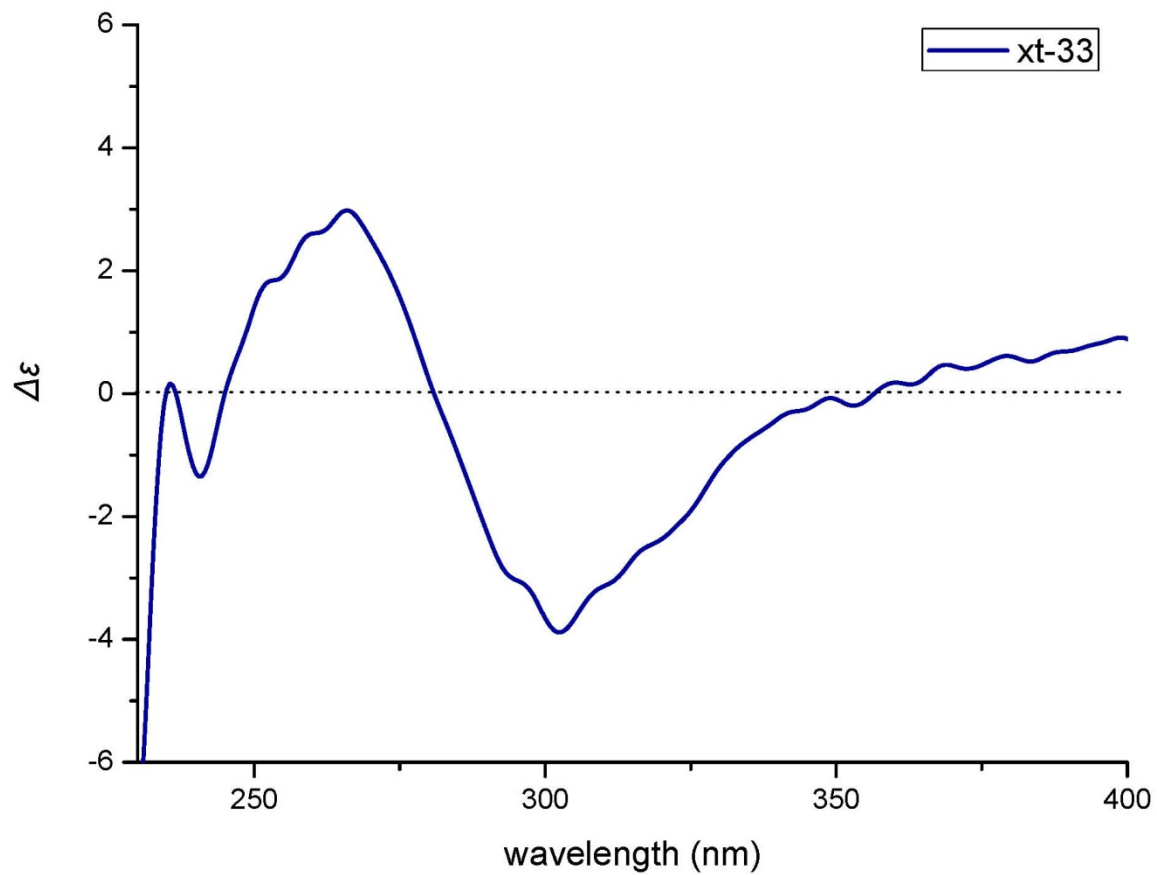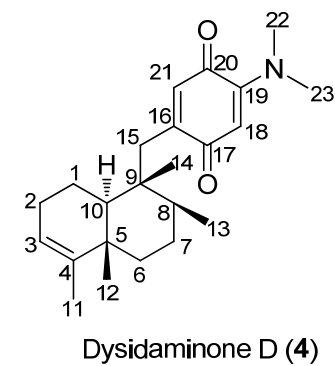

**Figure S41.** CD Spectrum of Dysidaminone D (4) in MeOH.

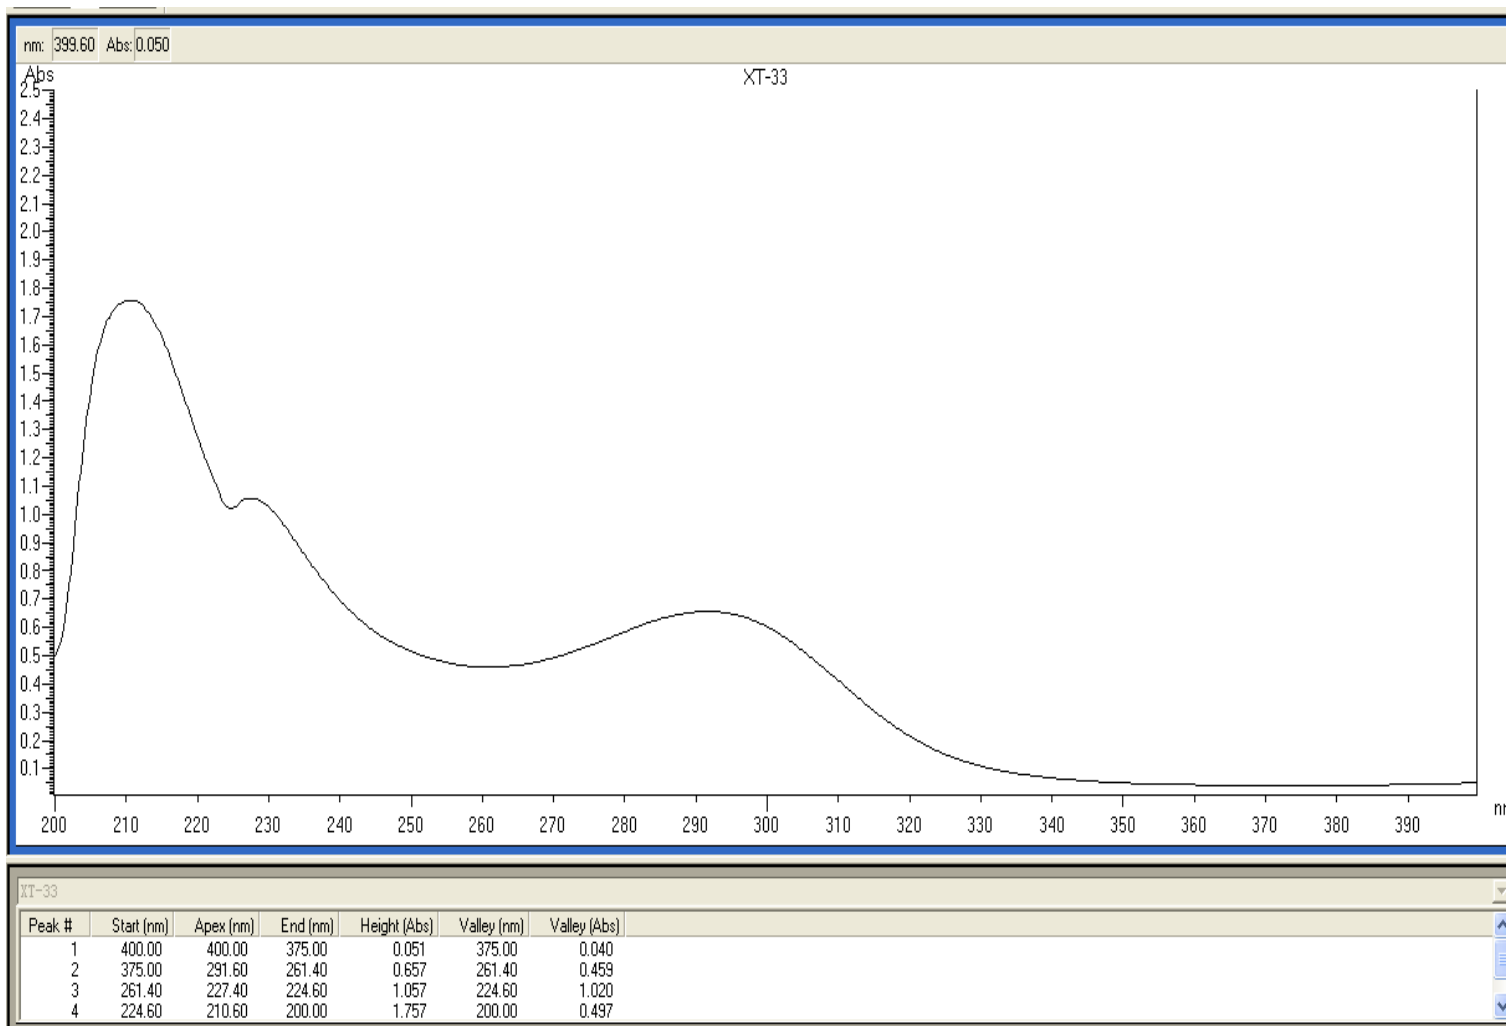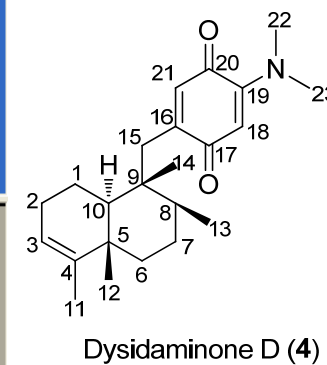

**Figure S42.** UV Spectrum of Dysidaminone D (4) in MeOH.



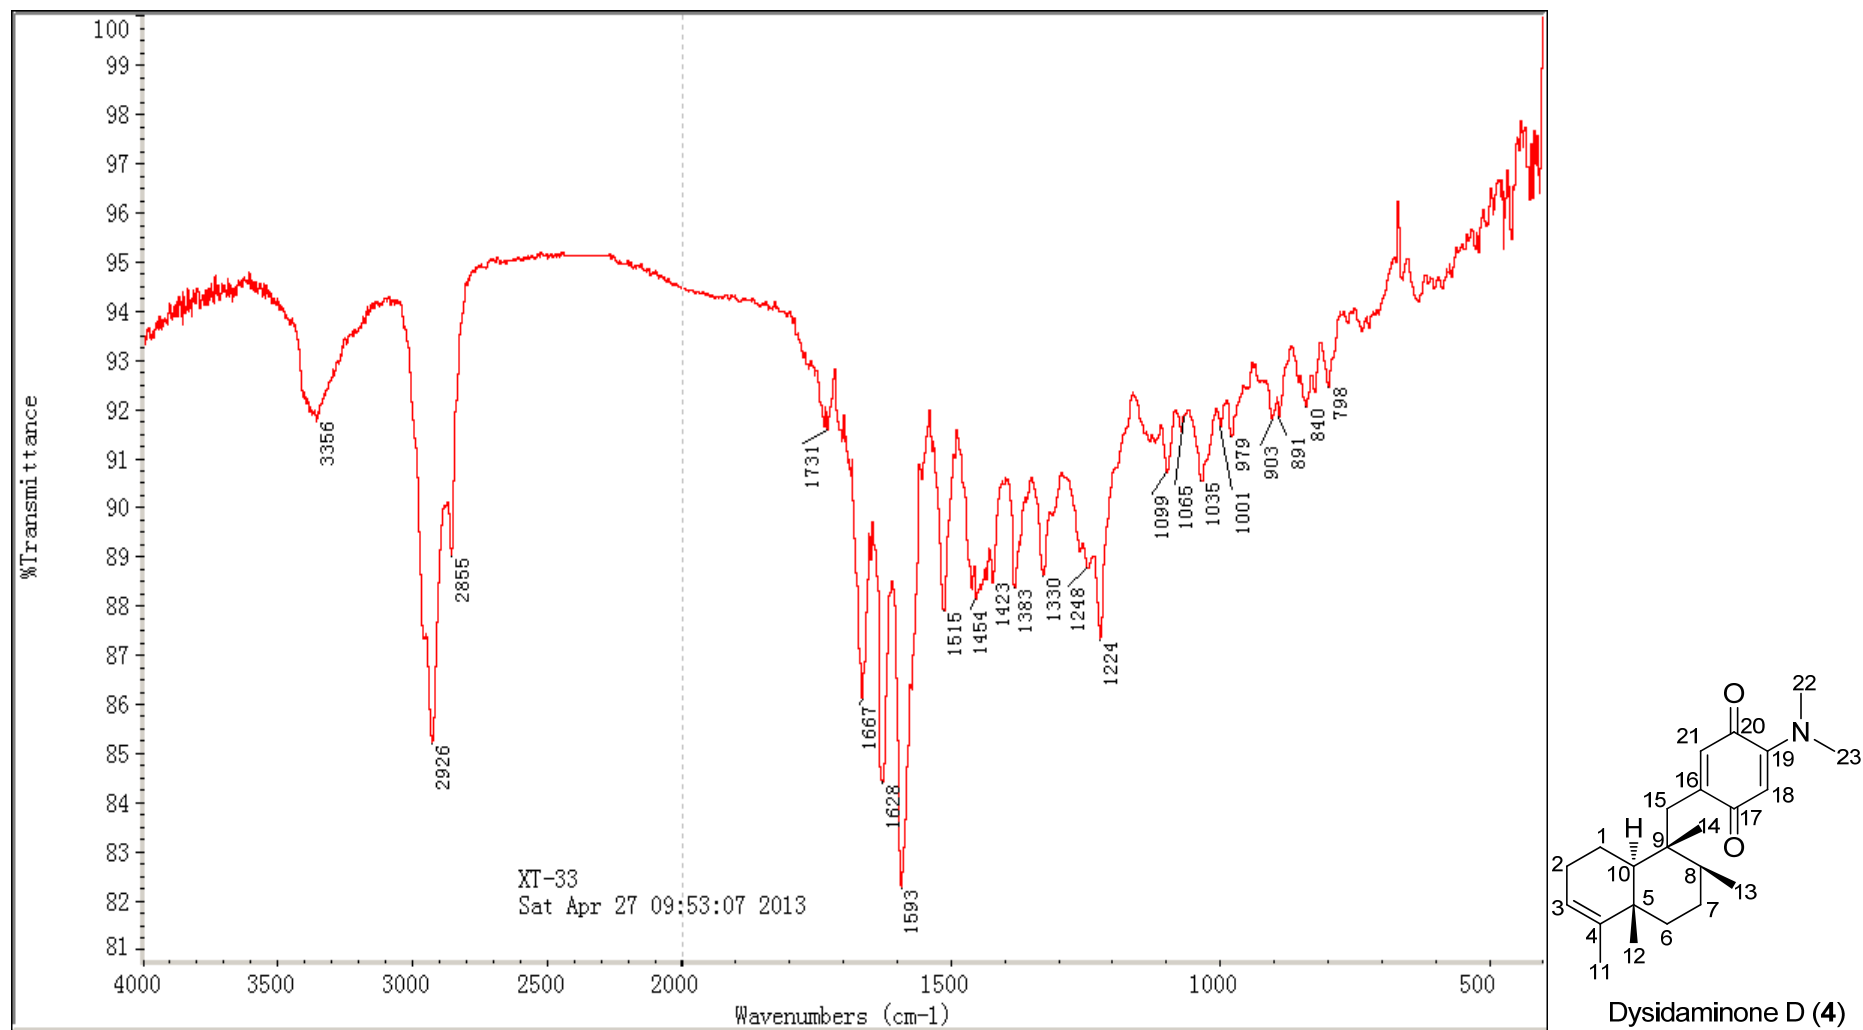

**Figure S43.** IR Spectrum of Dysidaminone D (4).

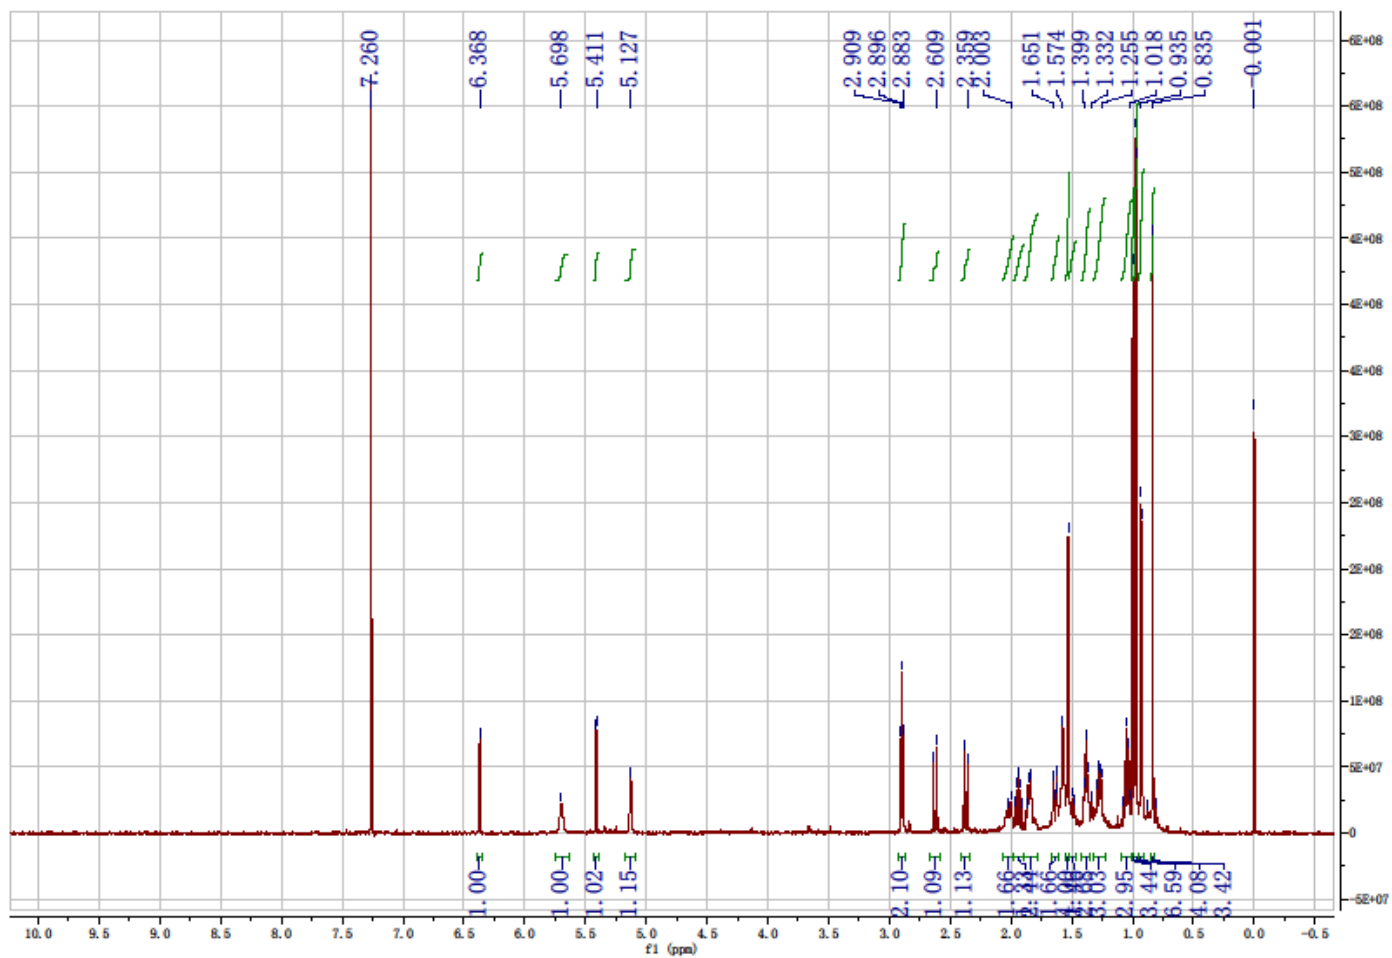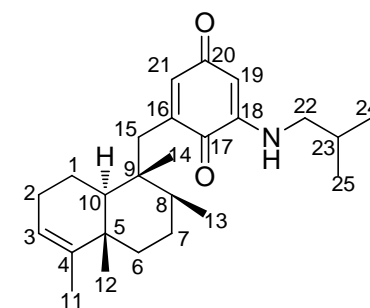

Dysidaminone E (5)

Figure S44.  $^1\text{H}$  NMR Spectrum of Dysidaminone E (5) in  $\text{CDCl}_3$ .

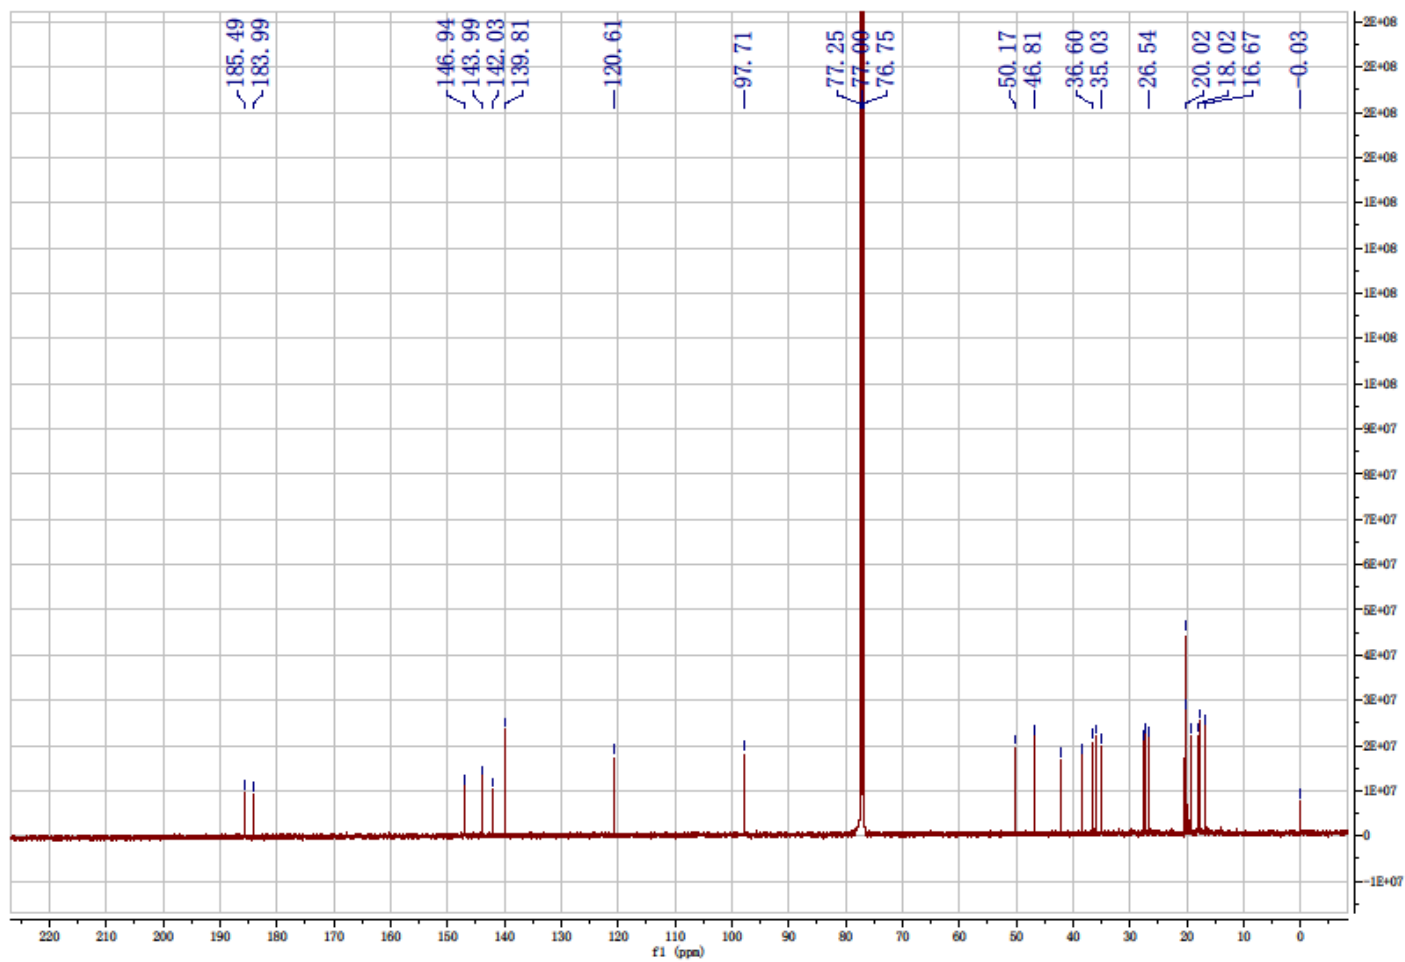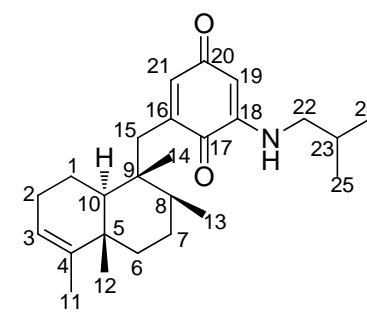

Dysidaminone E (5)

Figure S45.  $^{13}\text{C}$  NMR Spectrum of Dysidaminone E (5) in  $\text{CDCl}_3$ .

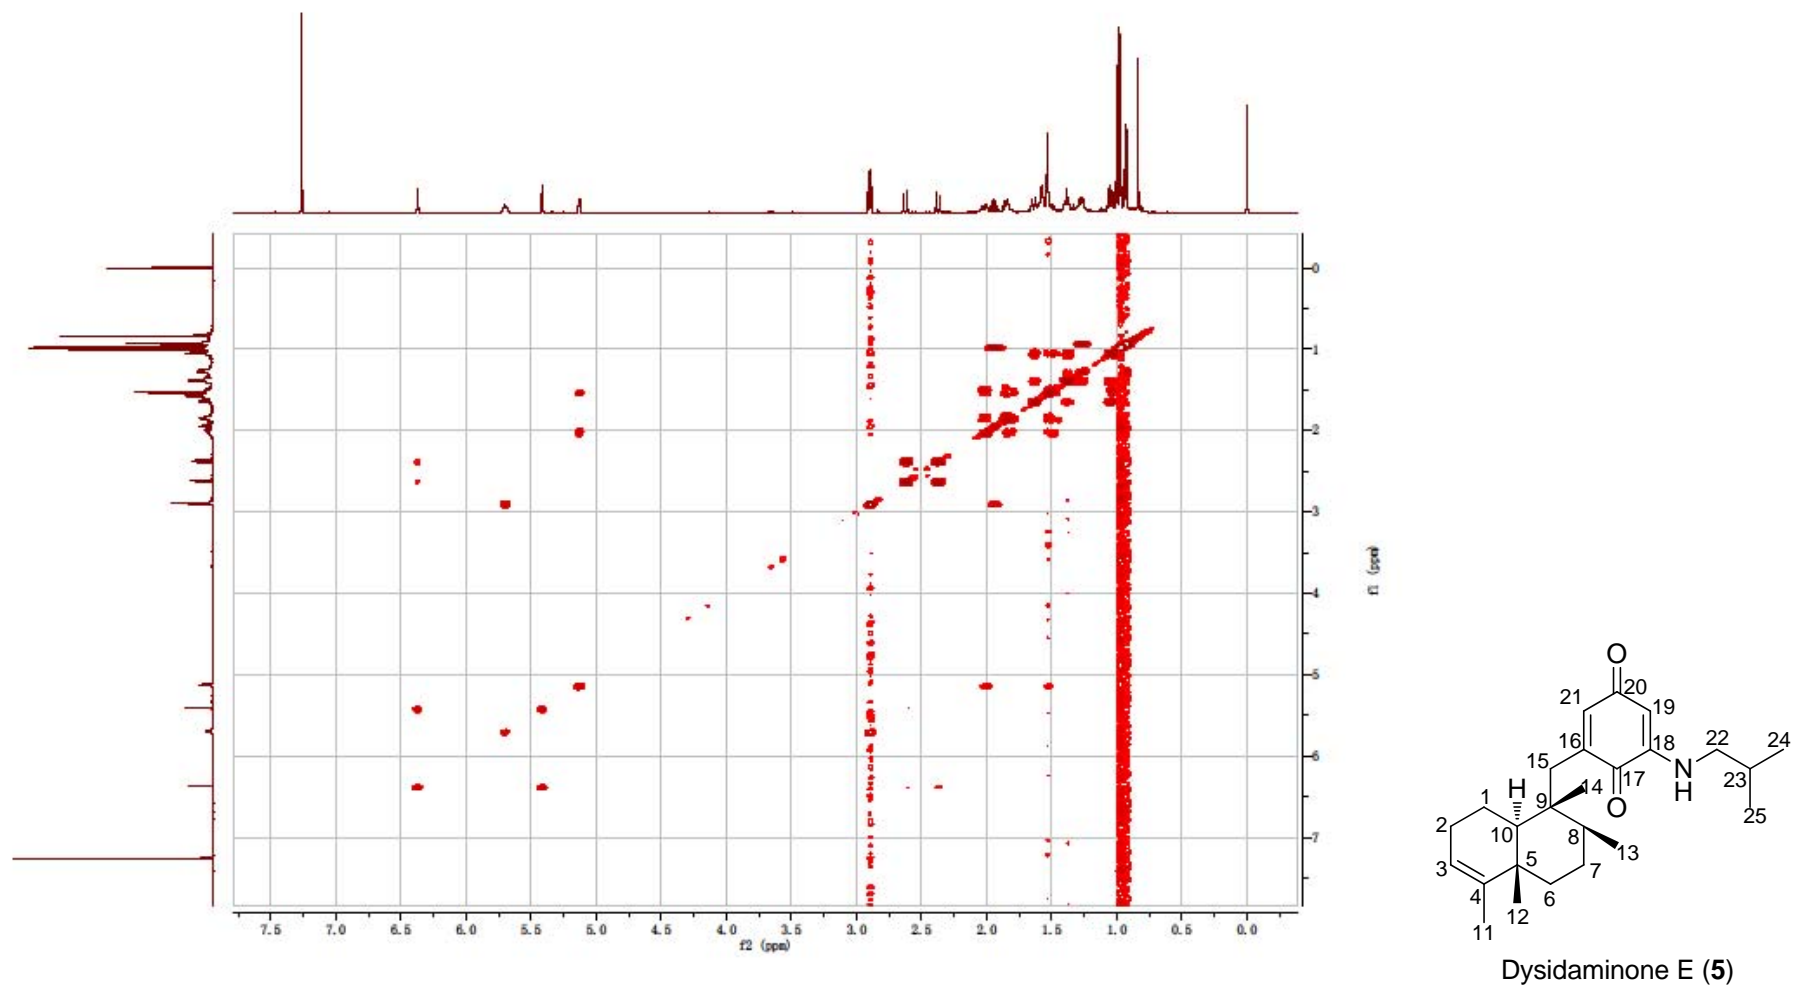

**Figure S46.**  $^1\text{H}$ - $^1\text{H}$  COSY Spectrum of Dysidaminone E (5) in  $\text{CDCl}_3$ .

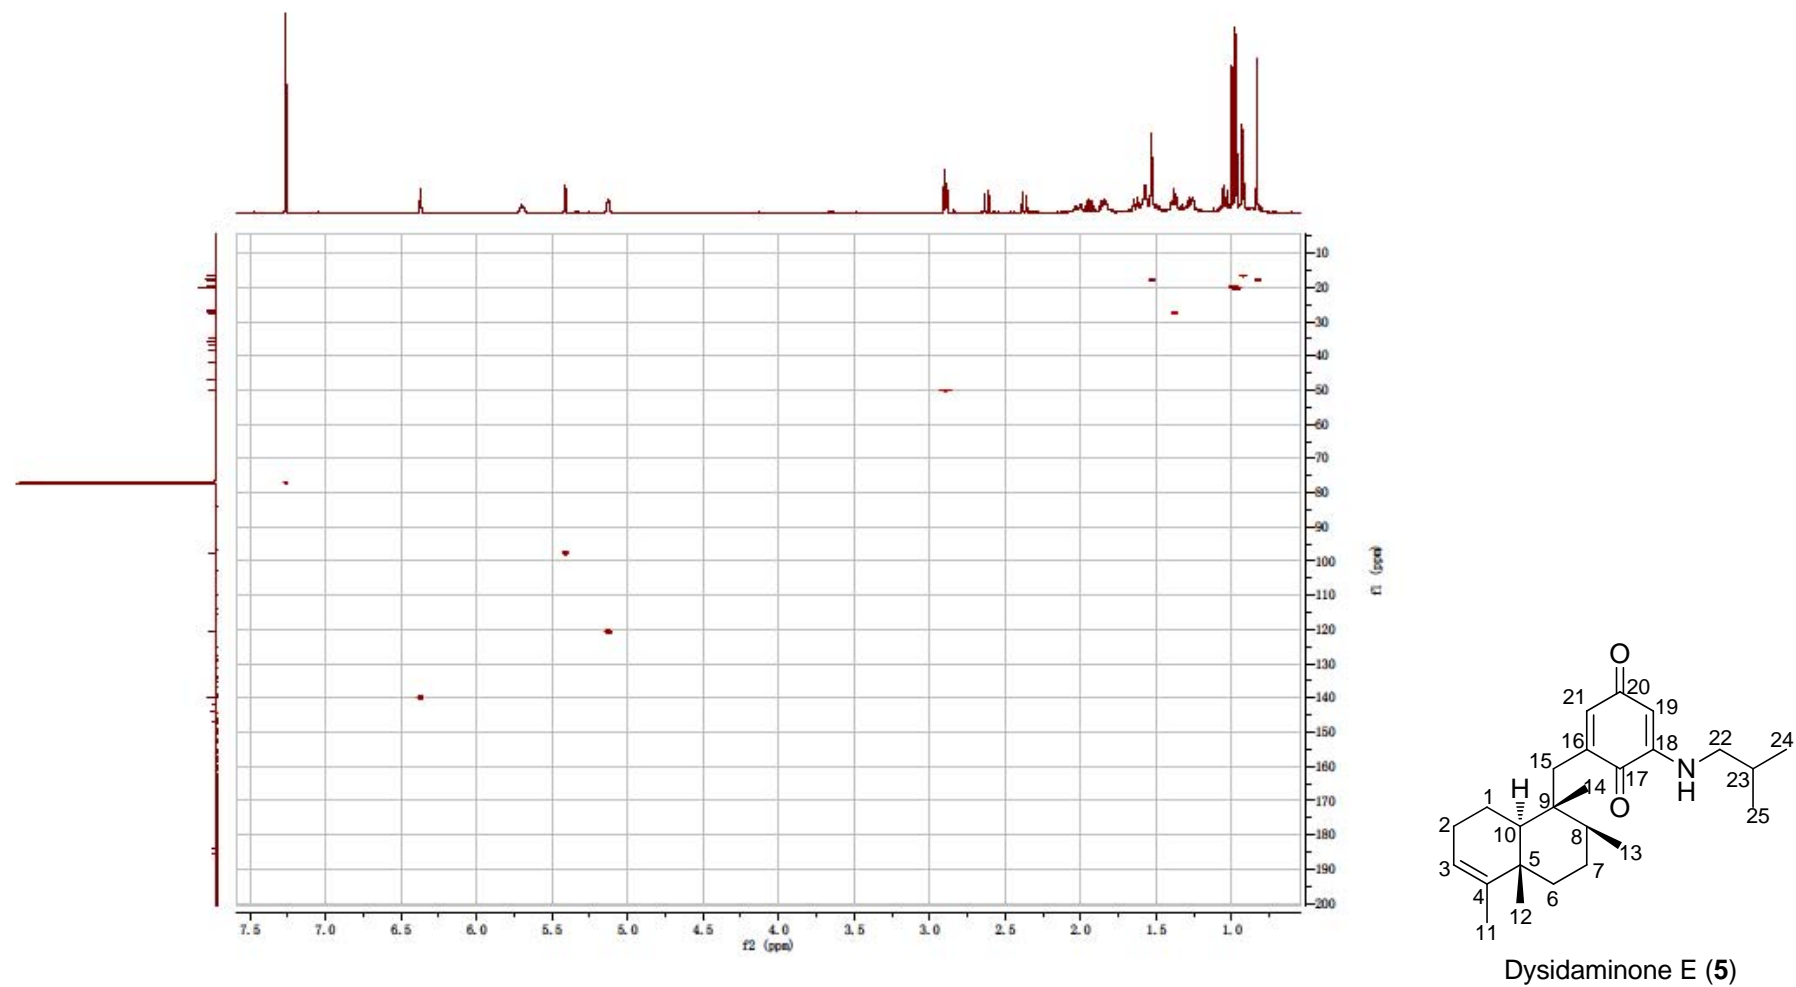

**Figure S47.** HSQC Spectrum of Dysidaminone E (5) in CDCl<sub>3</sub>.

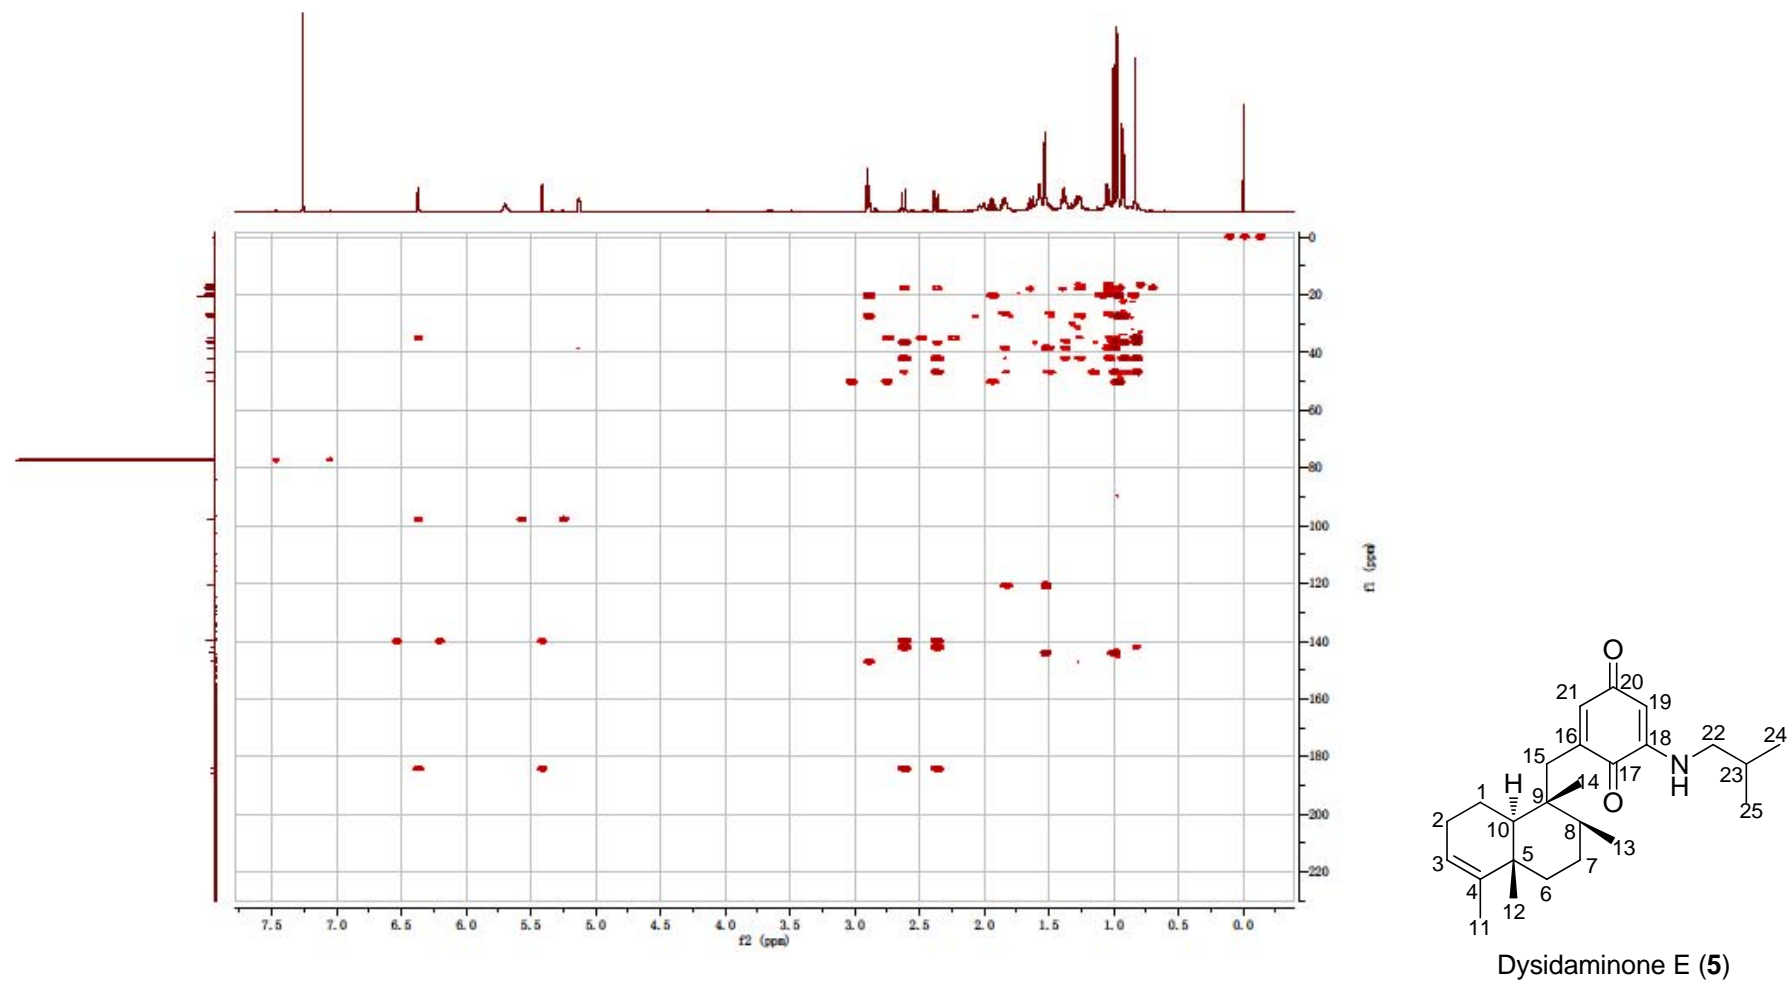

**Figure S48.** HMBC Spectrum of Dysidaminone E (**5**) in CDCl<sub>3</sub>.

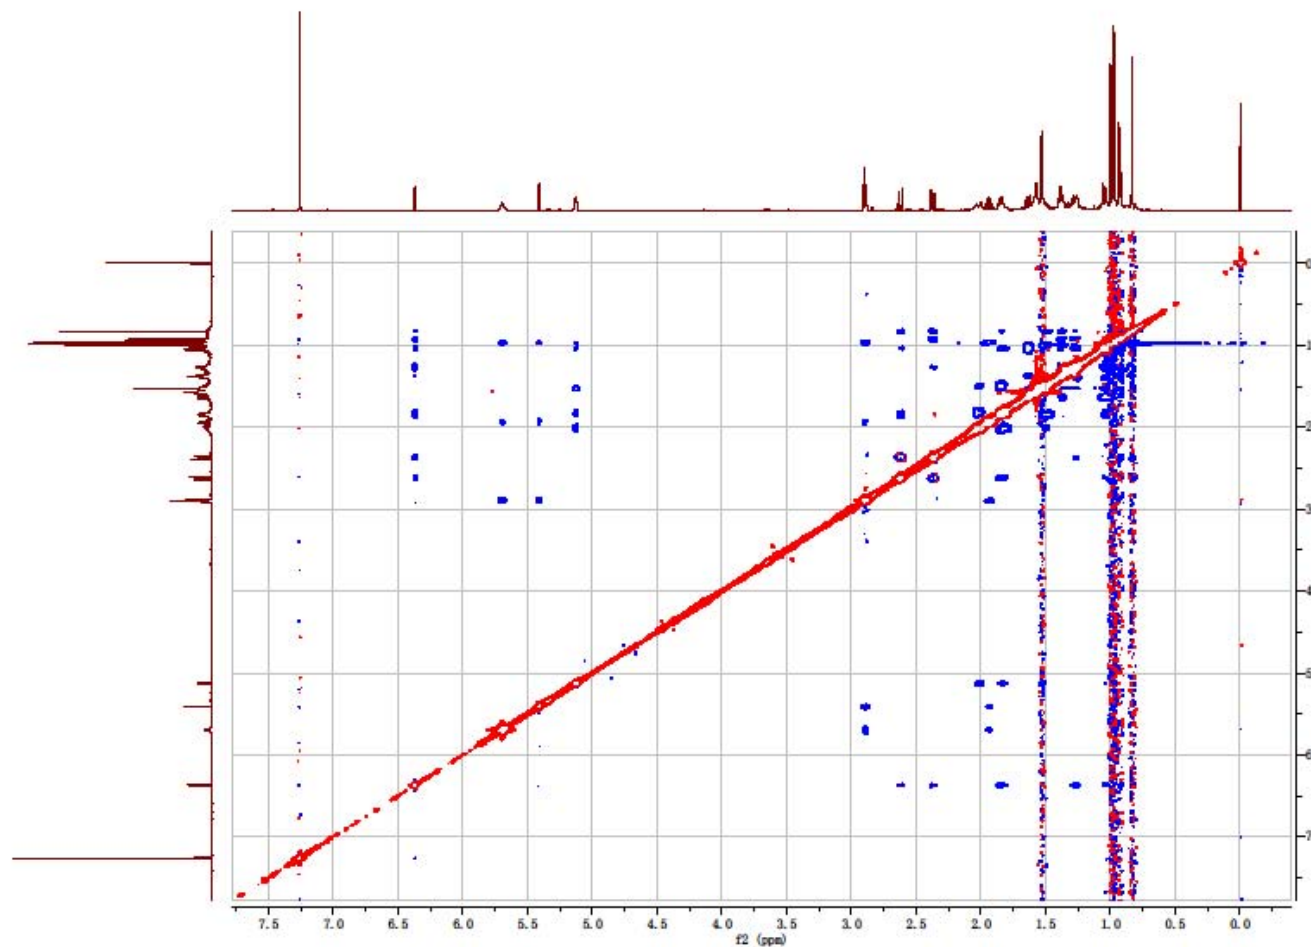

f1 (ppm)

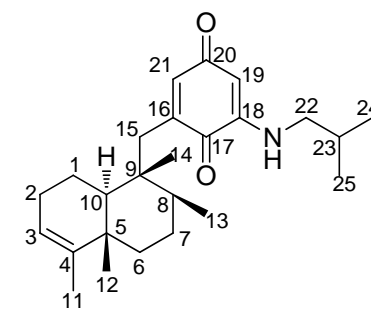

Dysidaminone E (5)

**Figure S49.** NOESY Spectrum of Dysidaminone E (5) in CDCl<sub>3</sub>.

## Elemental Composition Report

Page 1

Tolerance = 5.0 PPM / DBE: min = -1.5, max = 50.0

Selected filters: None

Monoisotopic Mass, Even Electron Ions

10 formula(e) evaluated with 1 results within limits (up to 50 closest results for each mass)

Elements Used:

C: 10-30 H: 10-40 N: 1-1 O: 1-4

SIPI

XT-28 M.W=383

WQ13-102H 39 (1.373) AM (Cen,4, 80.00, Ar,5000.0,376.07,0.70); Sm (SG, 2x3.00); Cm (30:40)

Q-ToF micro

YA019

30-Apr-2013,15:05:58

TOF MS ES+  
1.22e4

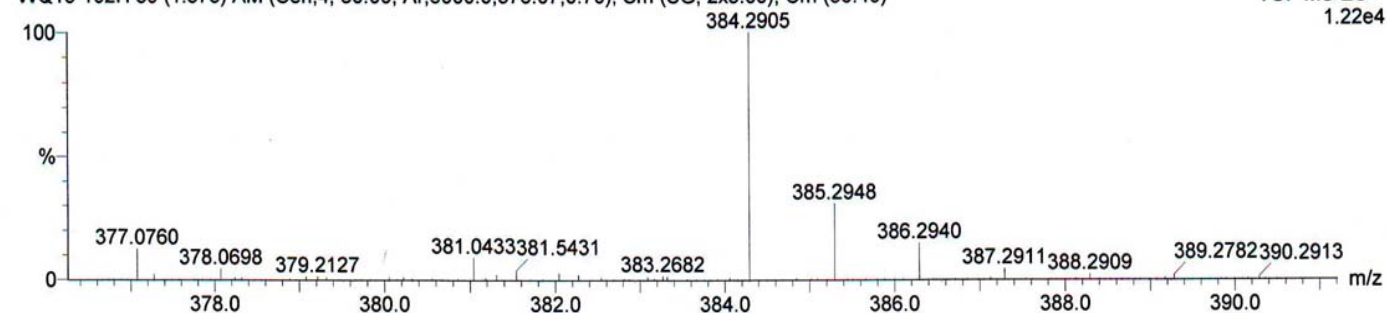

| Minimum: | 40.00  |            |     |     |      |       |              |  |  |
|----------|--------|------------|-----|-----|------|-------|--------------|--|--|
| Maximum: | 100.00 |            | 5.0 | 5.0 | -1.5 |       |              |  |  |
| Mass     | RA     | Calc. Mass | mDa | PPM | DBE  | i-FIT | Formula      |  |  |
| 384.2905 | 100.00 | 384.2903   | 0.2 | 0.5 | 7.5  | 439.1 | C25 H38 N O2 |  |  |

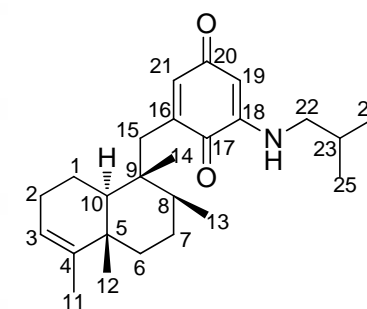

Dysidaminone E (5)

Figure S50. HRESIMS of Dysidaminone E (5).



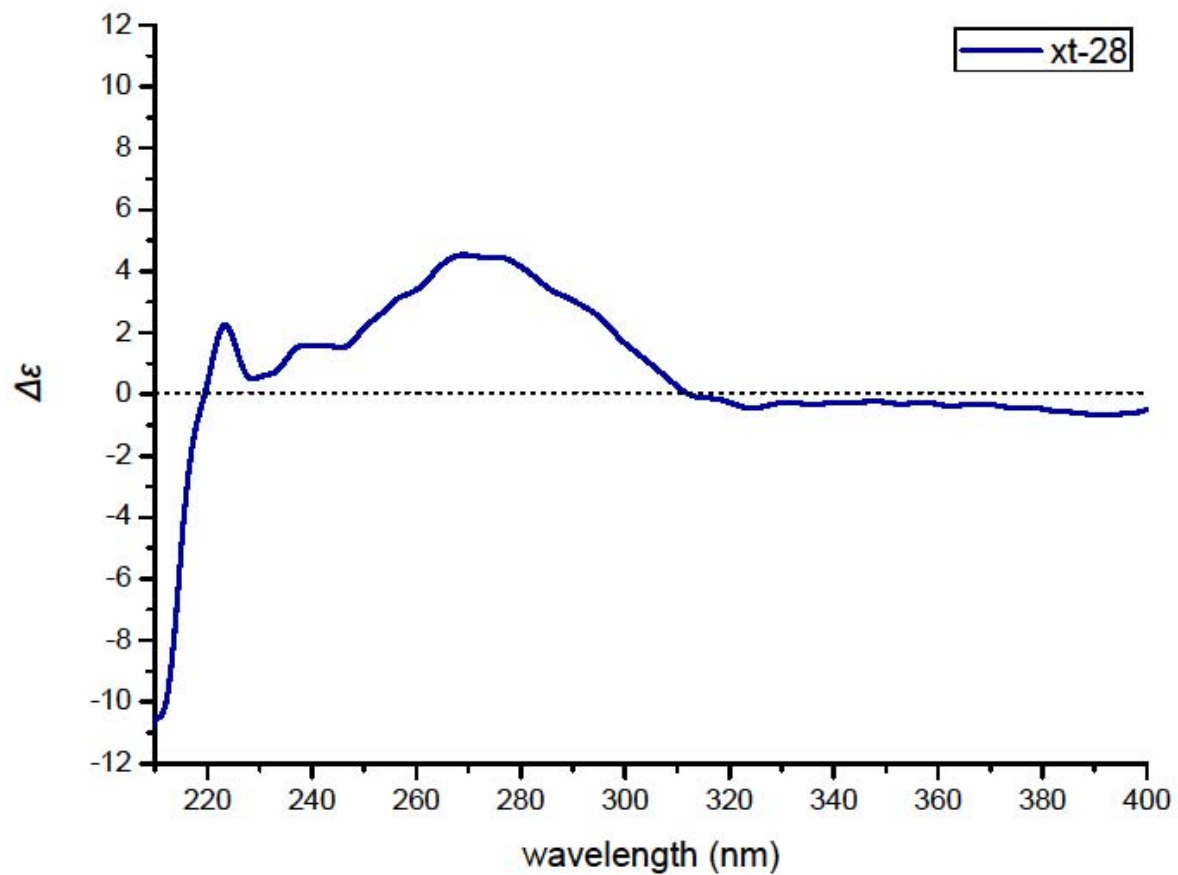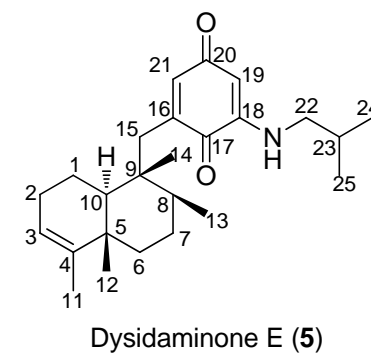

**Figure S51.** CD Spectrum of Dysidaminone E (**5**) in MeOH.

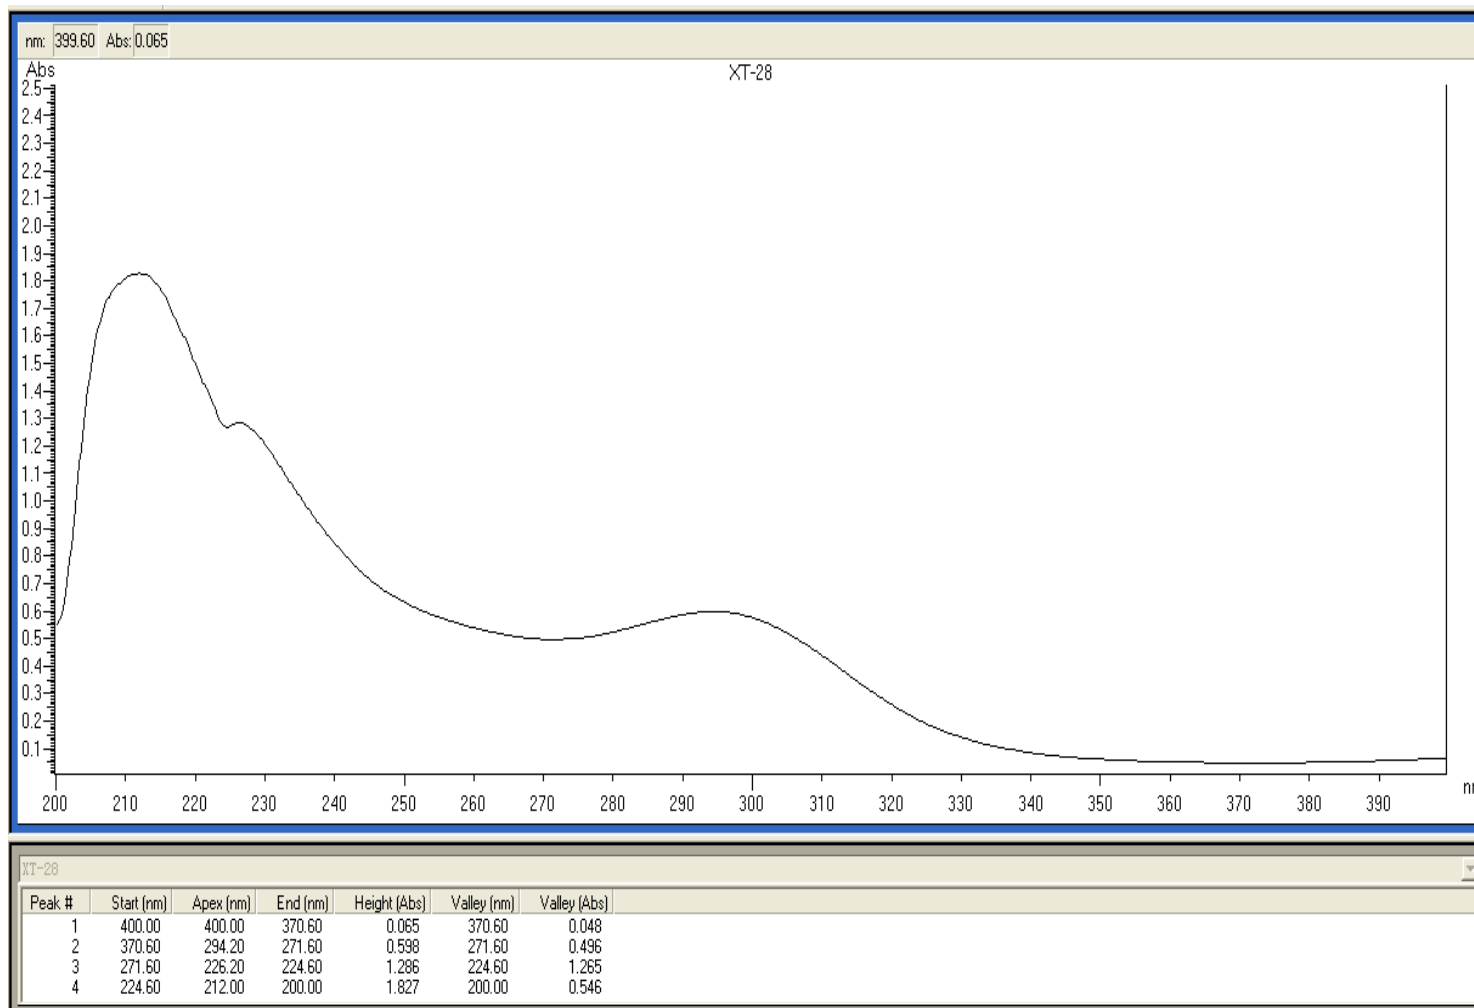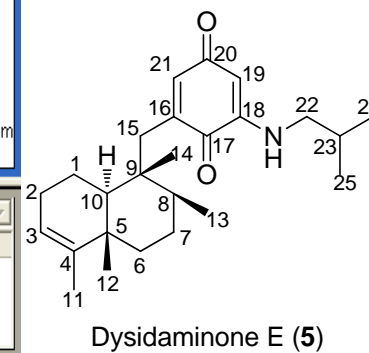

**Figure S52.** UV Spectrum of Dysidaminone E (5) in MeOH.

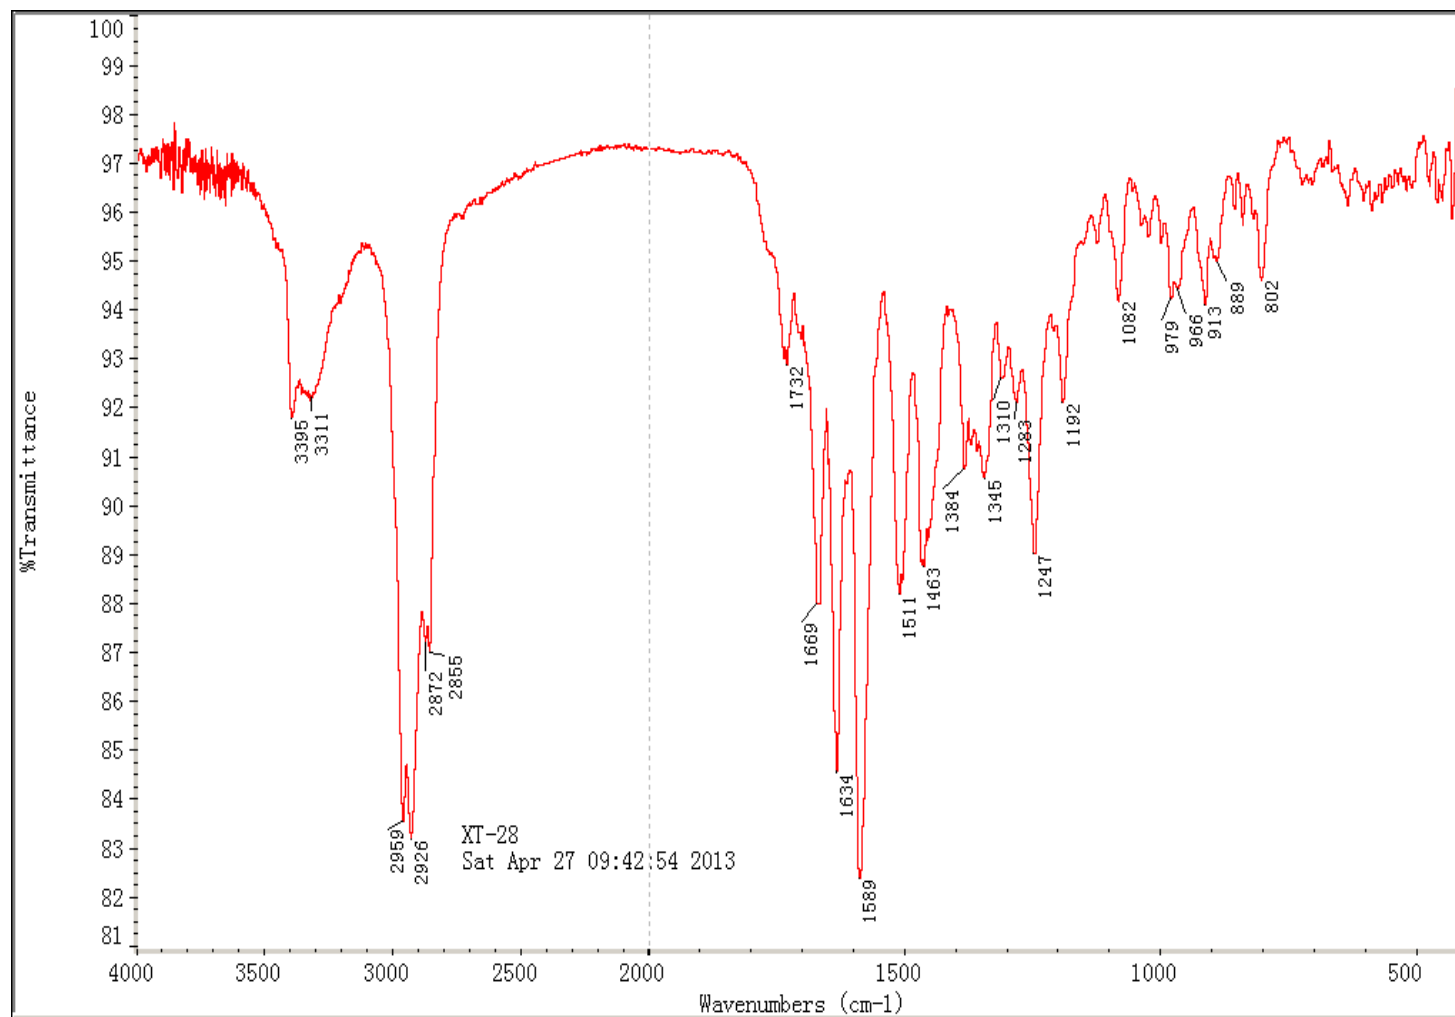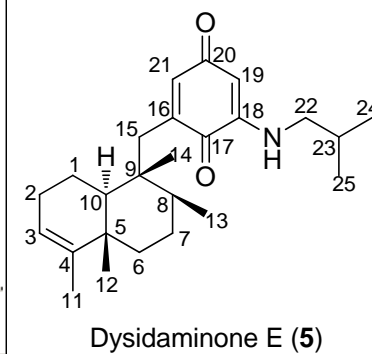

**Figure S53.** IR Spectrum of Dysidaminone E (5).

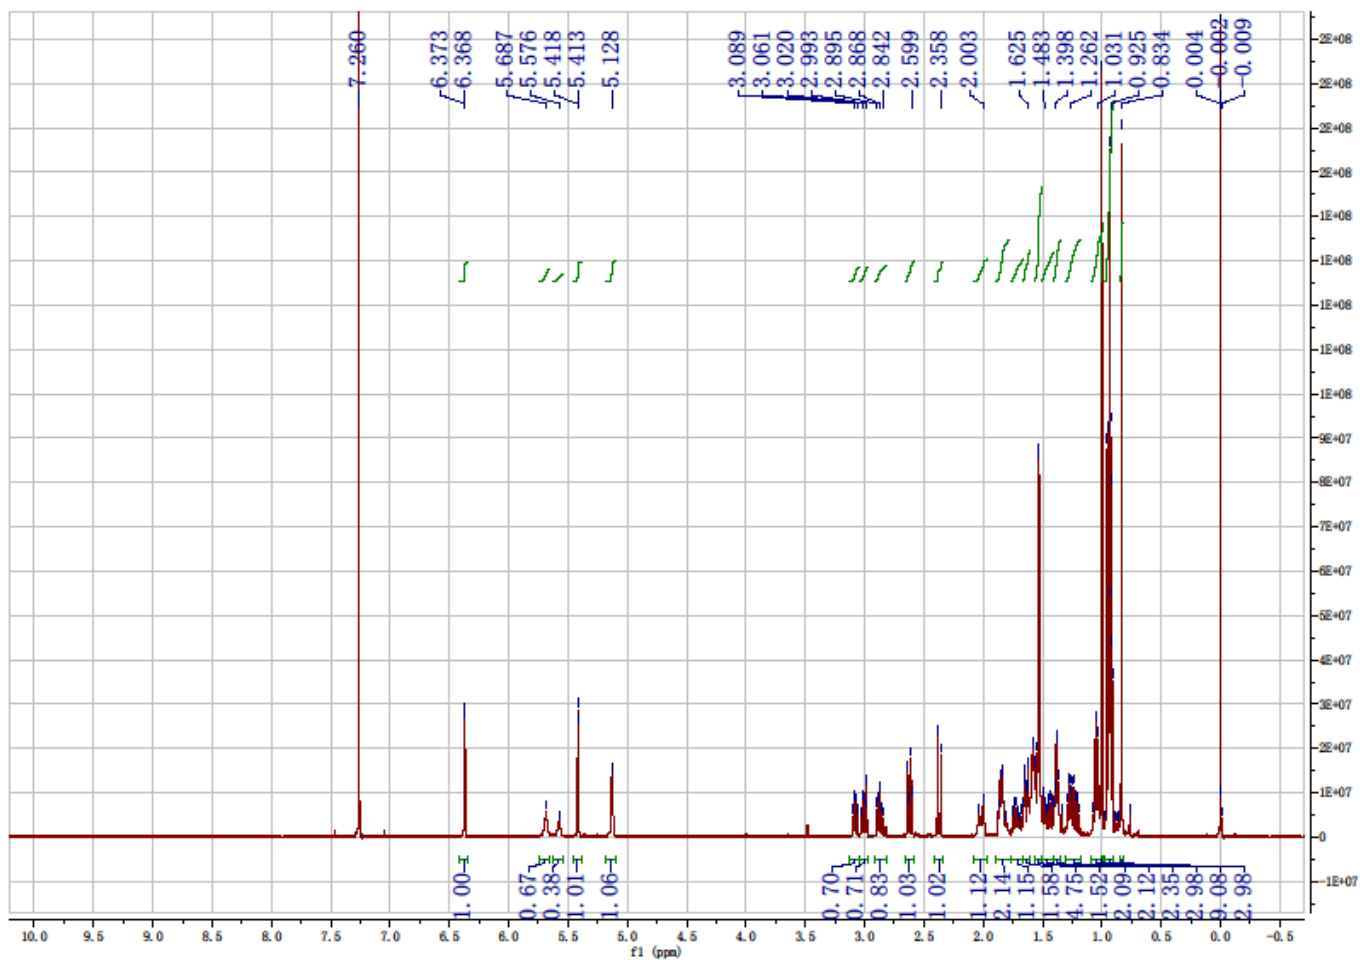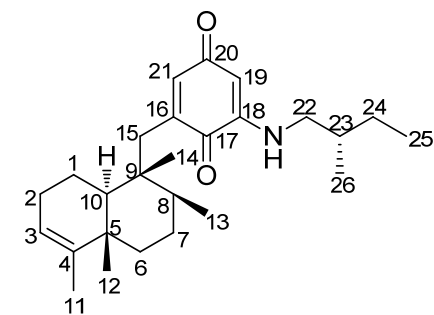

Dysidaminone F (6)

Figure S54.  $^1\text{H}$  NMR Spectrum of Dysidaminone F (6) in  $\text{CDCl}_3$ .

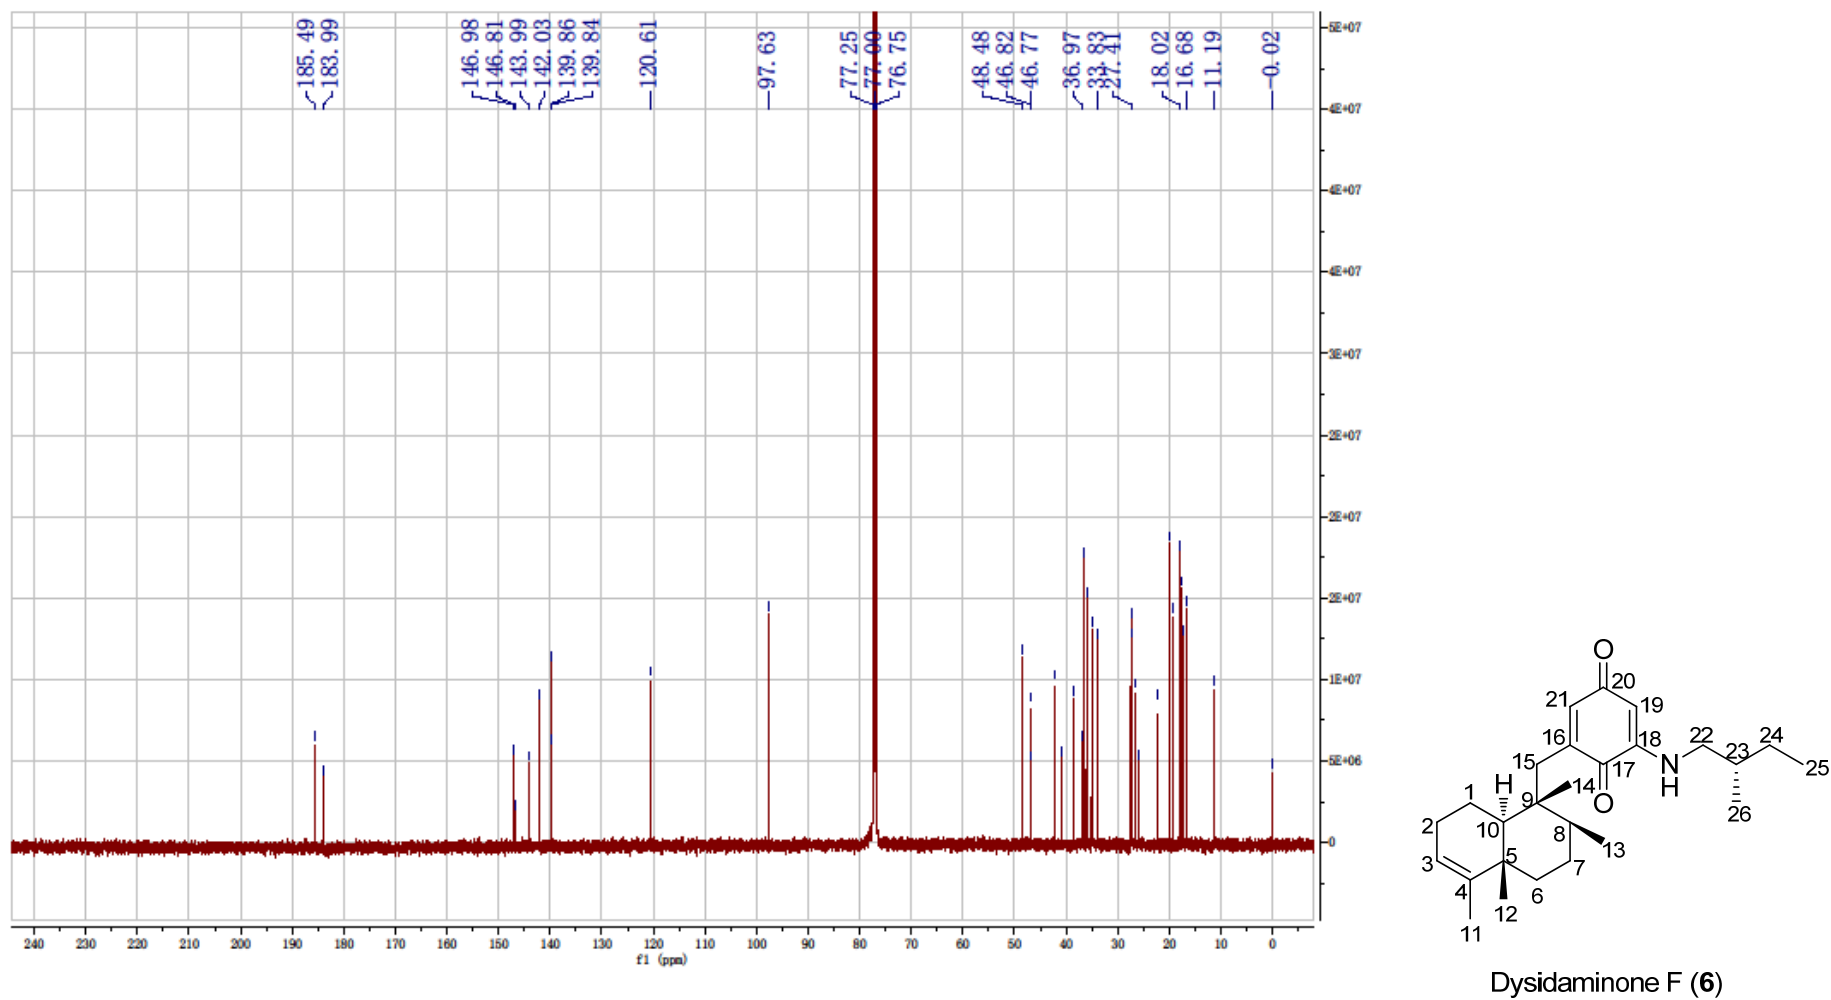

**Figure S55.**  $^{13}\text{C}$  NMR Spectrum of Dysidaminone F (6) in  $\text{CDCl}_3$ .

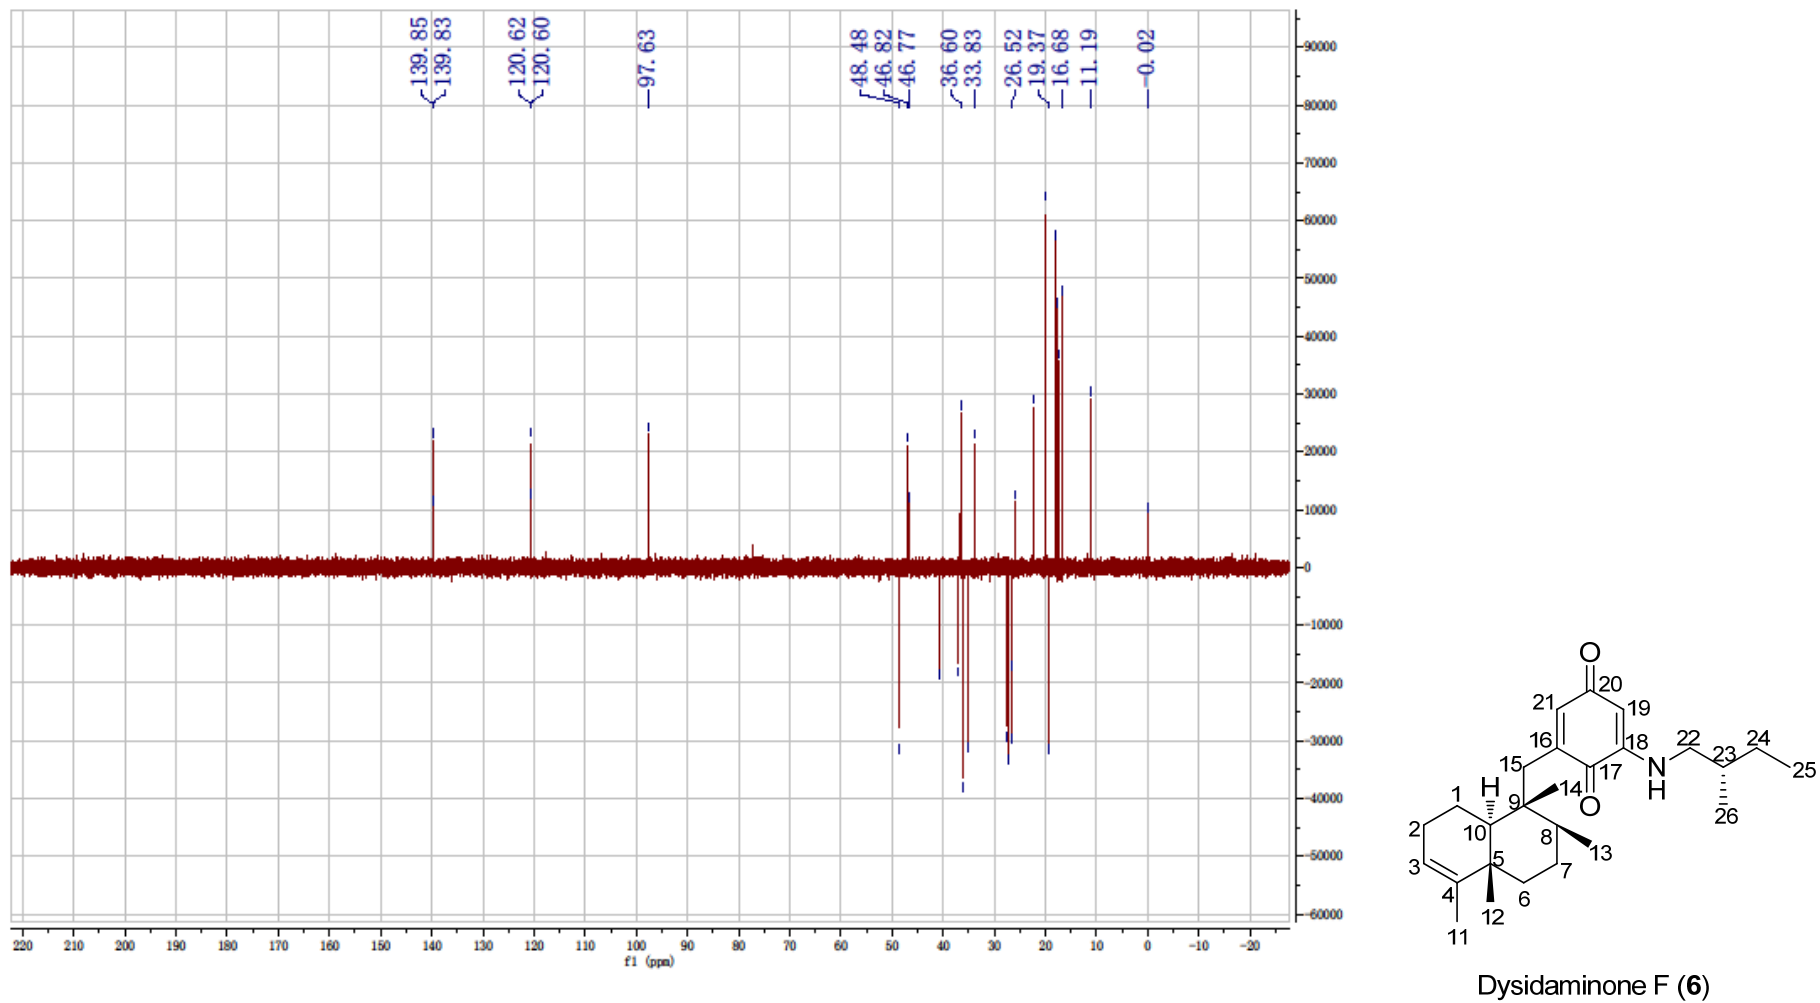

Figure S56. DEPT135 Spectrum of Dysidaminone F (6) in CDCl<sub>3</sub>.

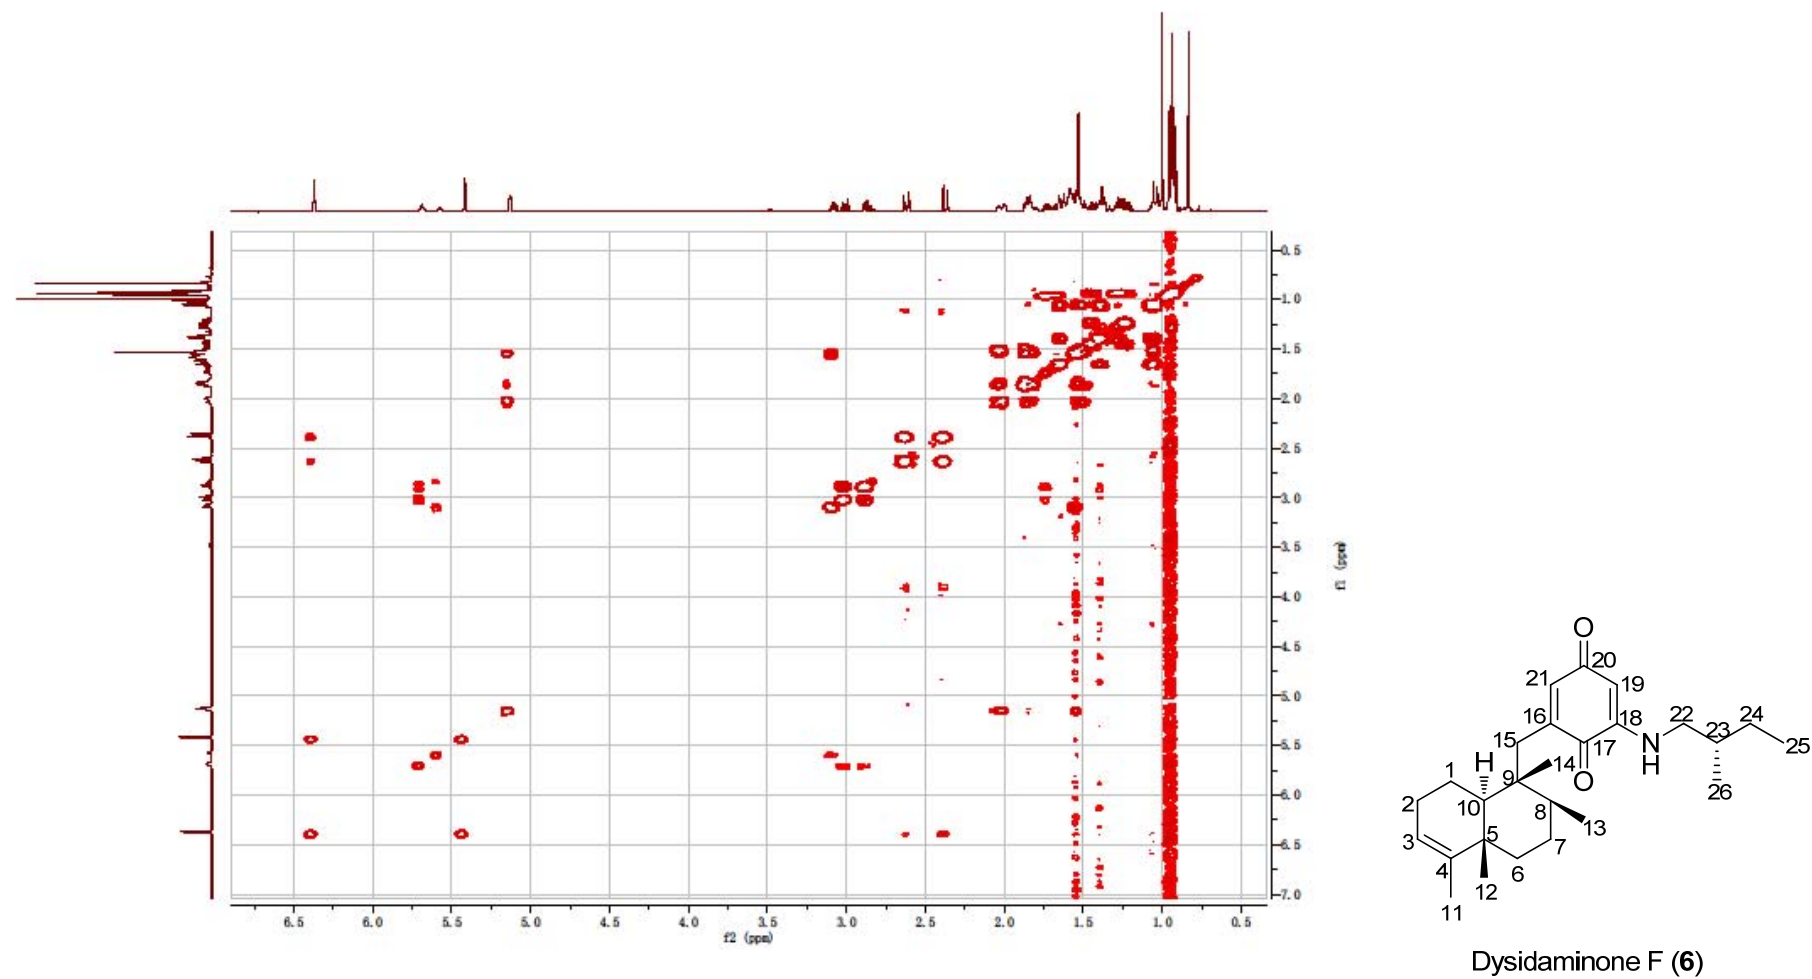

**Figure S57.** <sup>1</sup>H-<sup>1</sup>H COSY Spectrum of Dysidaminone F (**6**) in CDCl<sub>3</sub>.

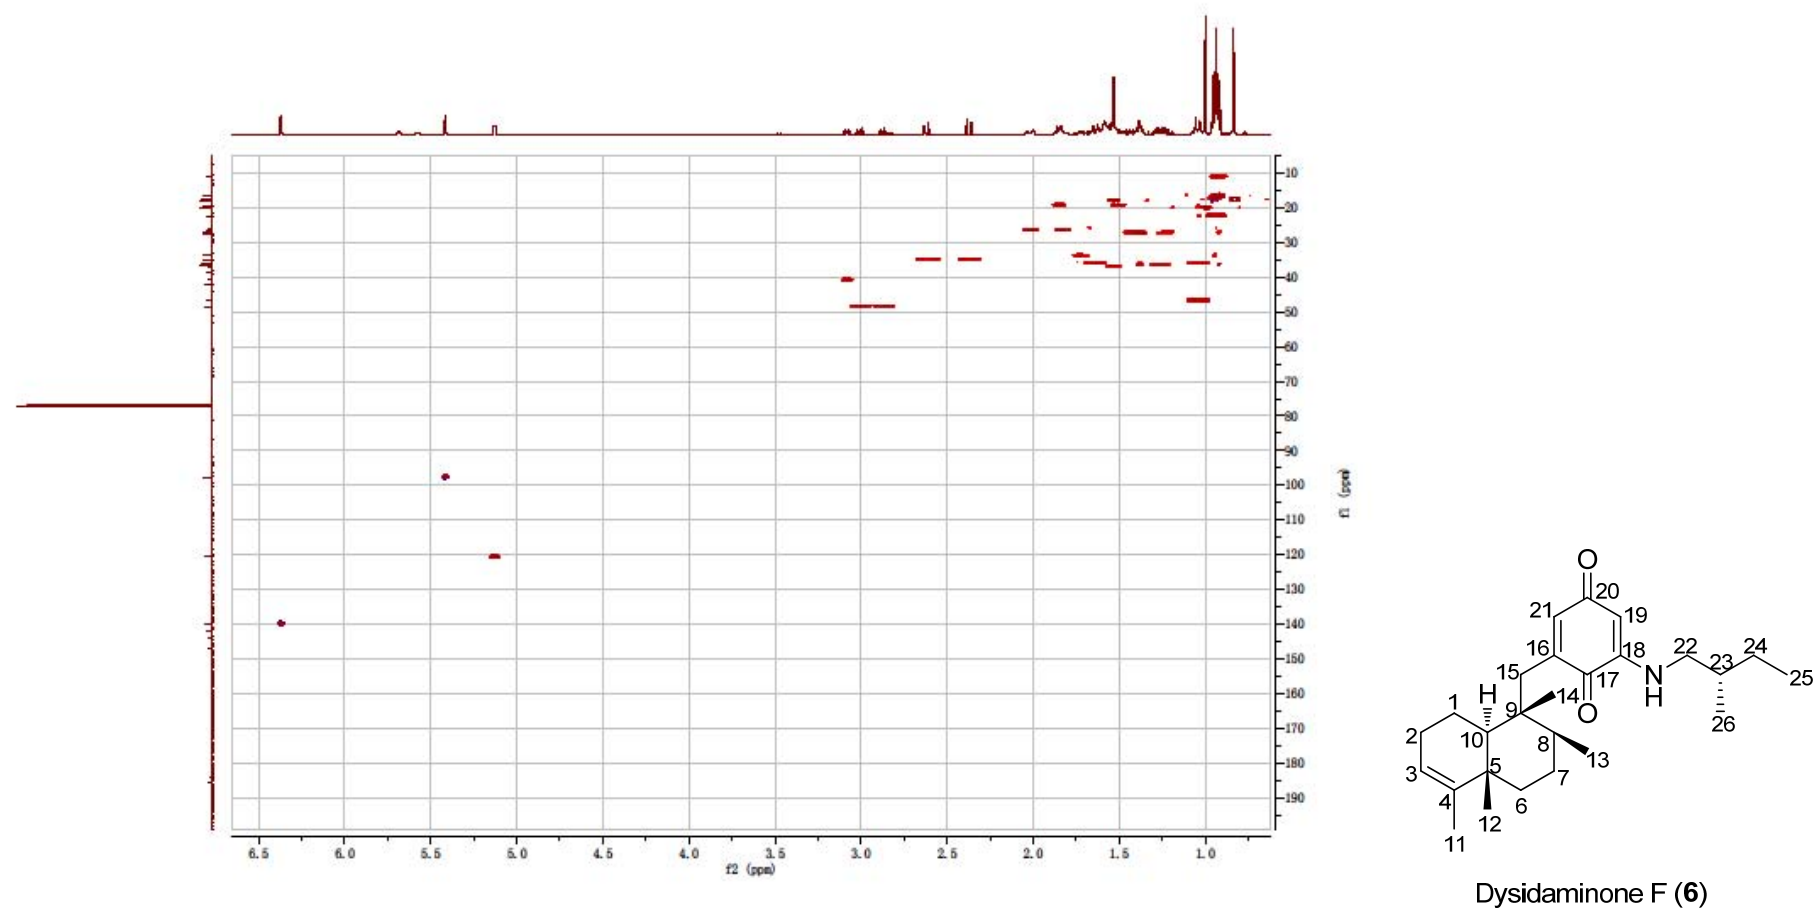

**Figure S58.** HSQC Spectrum of Dysidaminone F (6) in CDCl<sub>3</sub>.



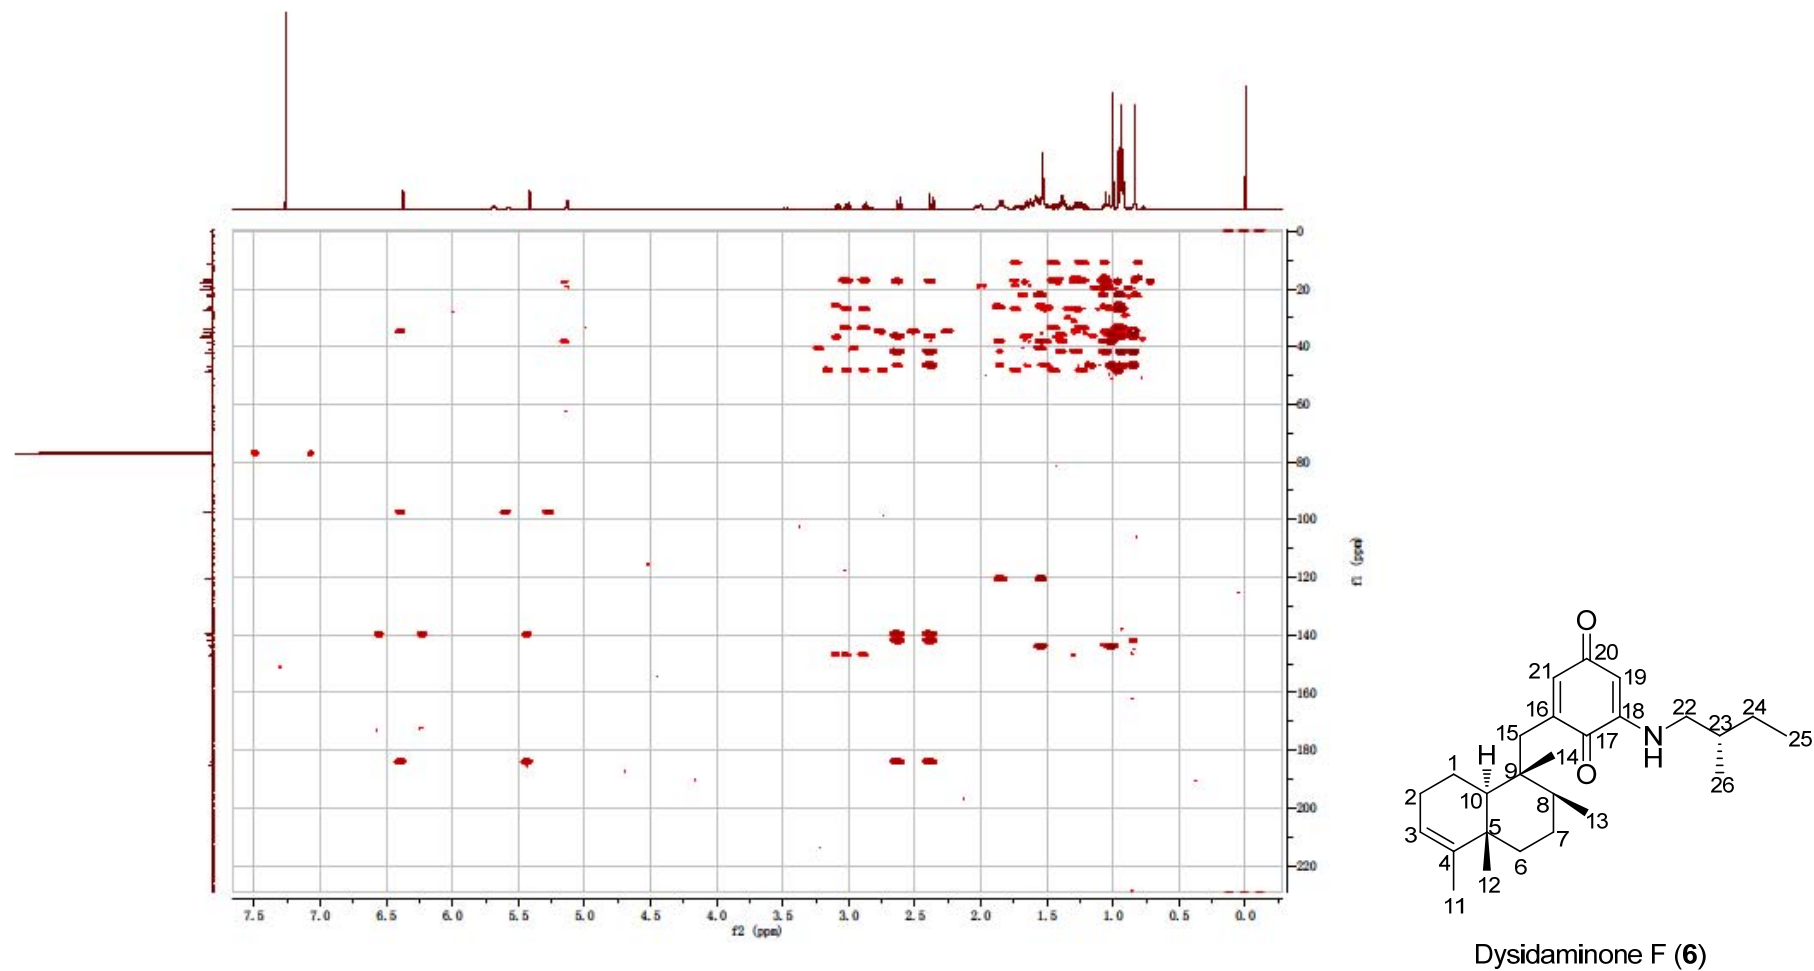

**Figure S59.** HMBC Spectrum of Dysidaminone F (**6**) in CDCl<sub>3</sub>.

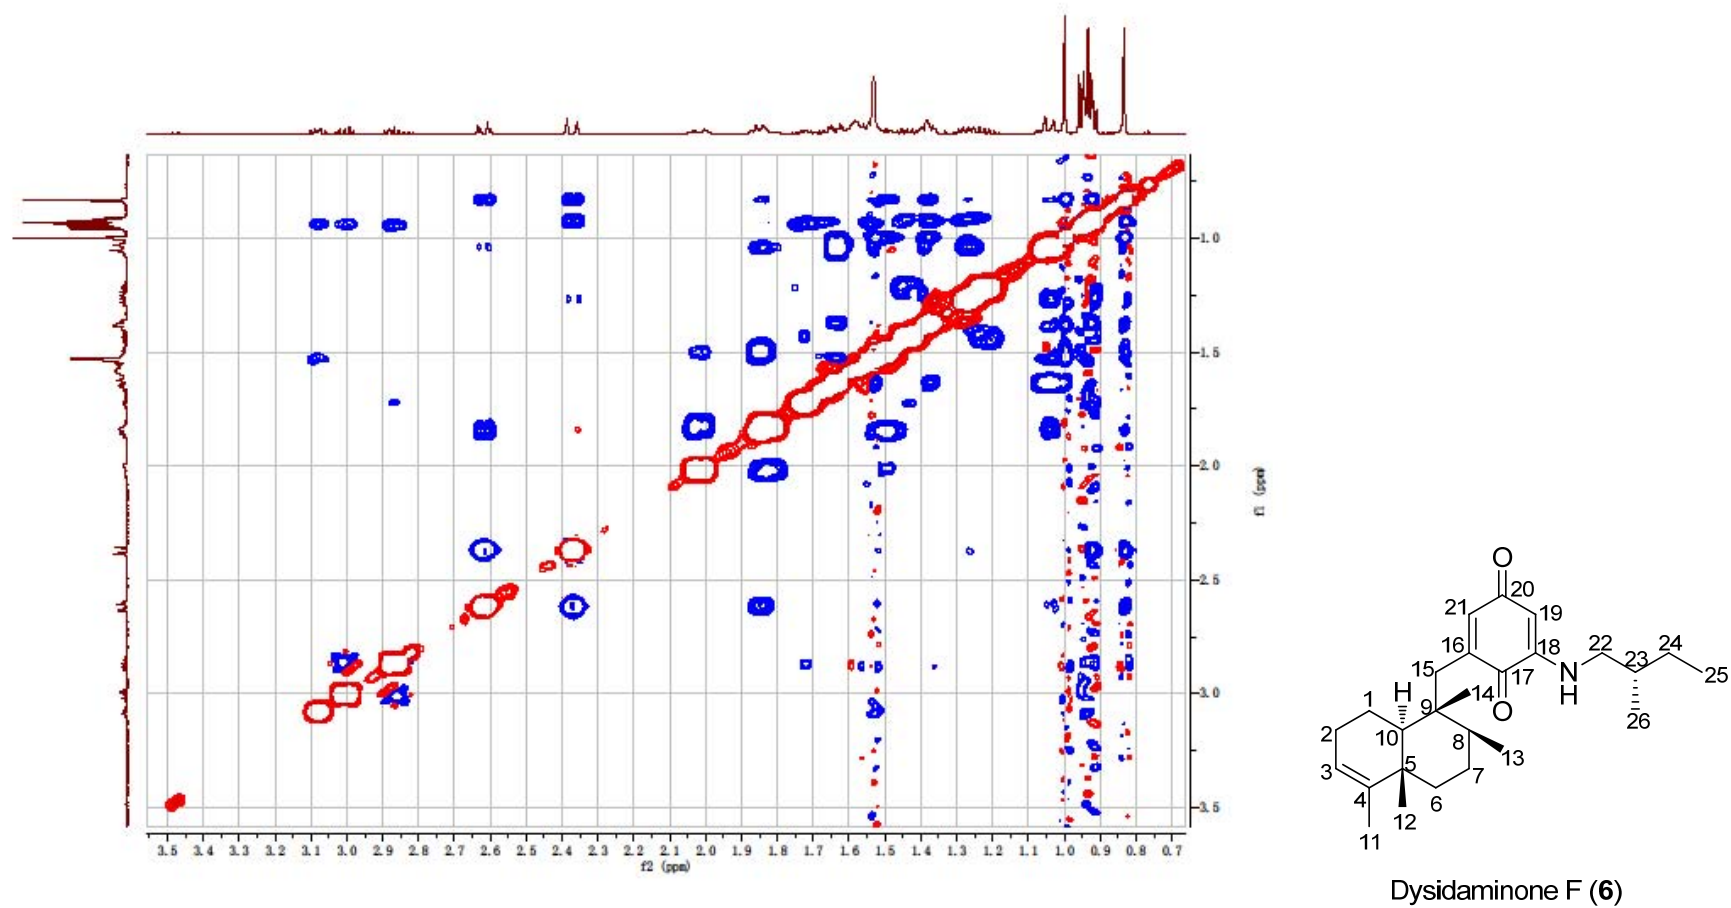

**Figure S60.** NOESY Spectrum of Dysidaminone F (6) in CDCl<sub>3</sub>.

## Elemental Composition Report

Page 1

Tolerance = 10.0 PPM / DBE: min = -1.5, max = 50.0  
Selected filters: None

Monoisotopic Mass, Even Electron Ions

6 formula(e) evaluated with 1 results within limits (up to 50 closest results for each mass)

Elements Used:

C: 10-30 H: 10-50 N: 1-1 O: 1-2 Na: 1-1

SIPI

XT-31 M.W=397

WQ13-109H1 20 (0.691) AM (Cen,4, 80.00, Ar,5000.0,407.22,0.70); Sm (SG, 2x3.00); Cm (13:20)

Q-ToF micro

YA019

08-May-2013,14:35:41

TOF MS ES+

6.37e3

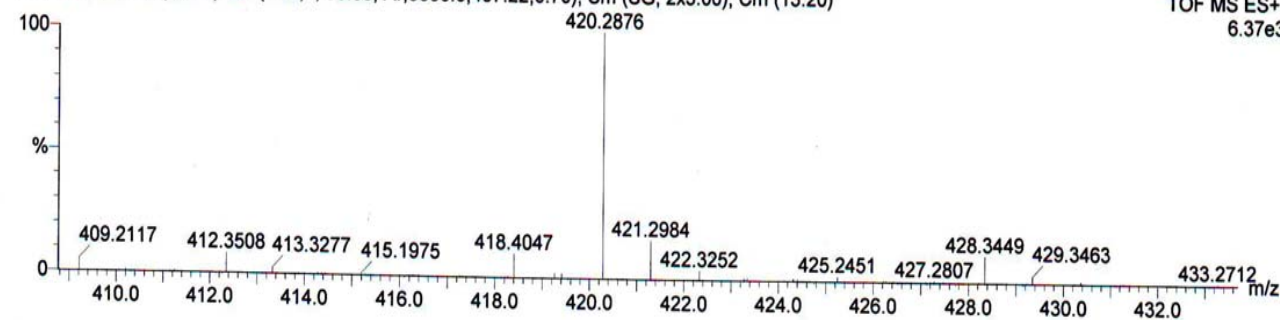

Minimum: 50.00  
Maximum: 100.00

| Mass     | RA     | Calc. Mass | mDa  | PPM  | DBE | i-FIT | Formula                                             |
|----------|--------|------------|------|------|-----|-------|-----------------------------------------------------|
| 420.2876 | 100.00 | 420.2878   | -0.2 | -0.5 | 7.5 | 275.5 | C <sub>26</sub> H <sub>39</sub> N O <sub>2</sub> Na |

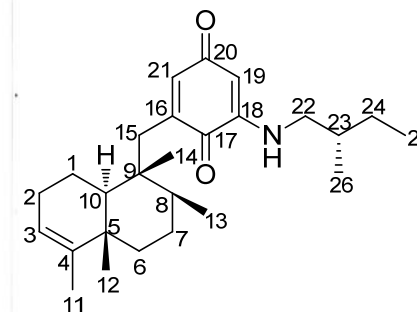

Dysidaminone F (6)

Figure S61. HRESIMS of Dysidaminone F (6).

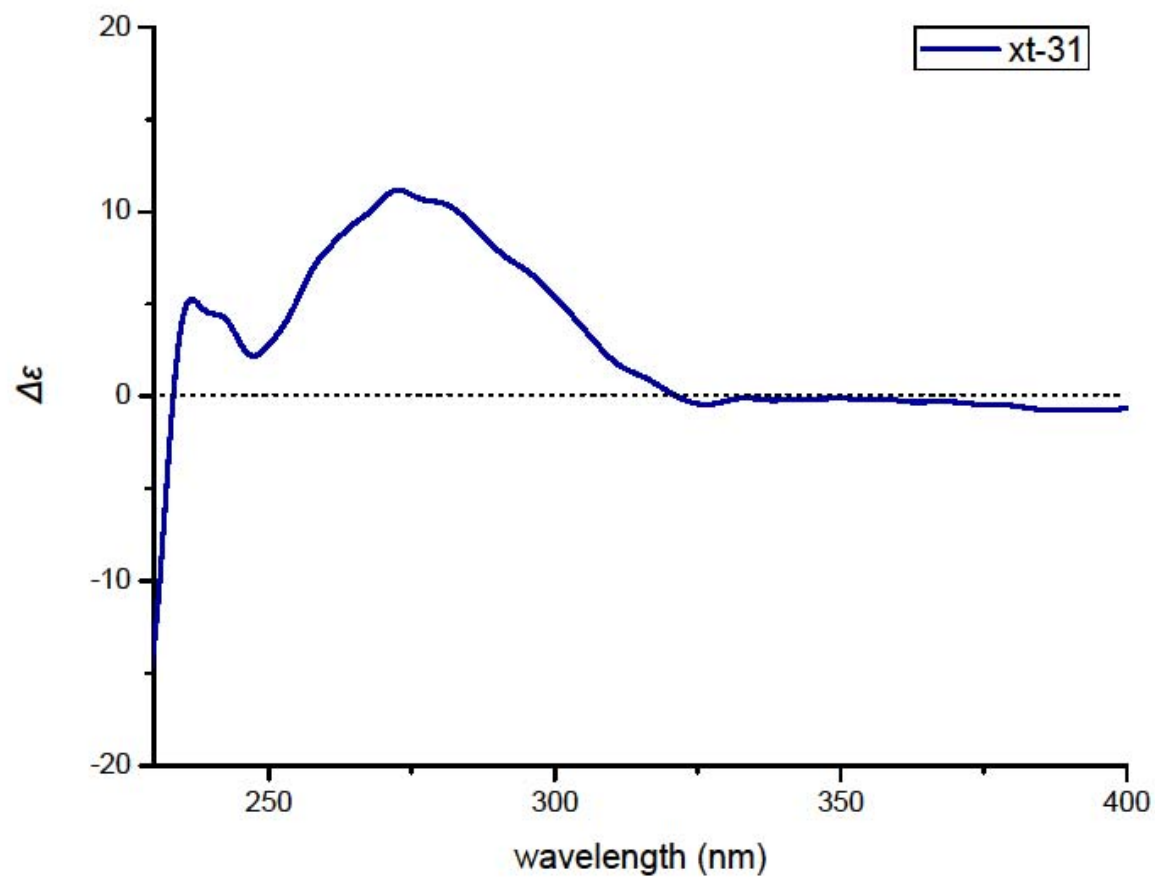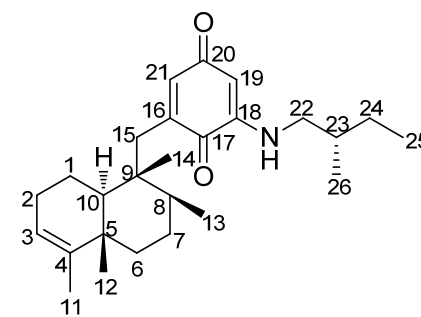

Dysidaminone F (6)

**Figure S62.** CD Spectrum of Dysidaminone F (6) in MeOH.

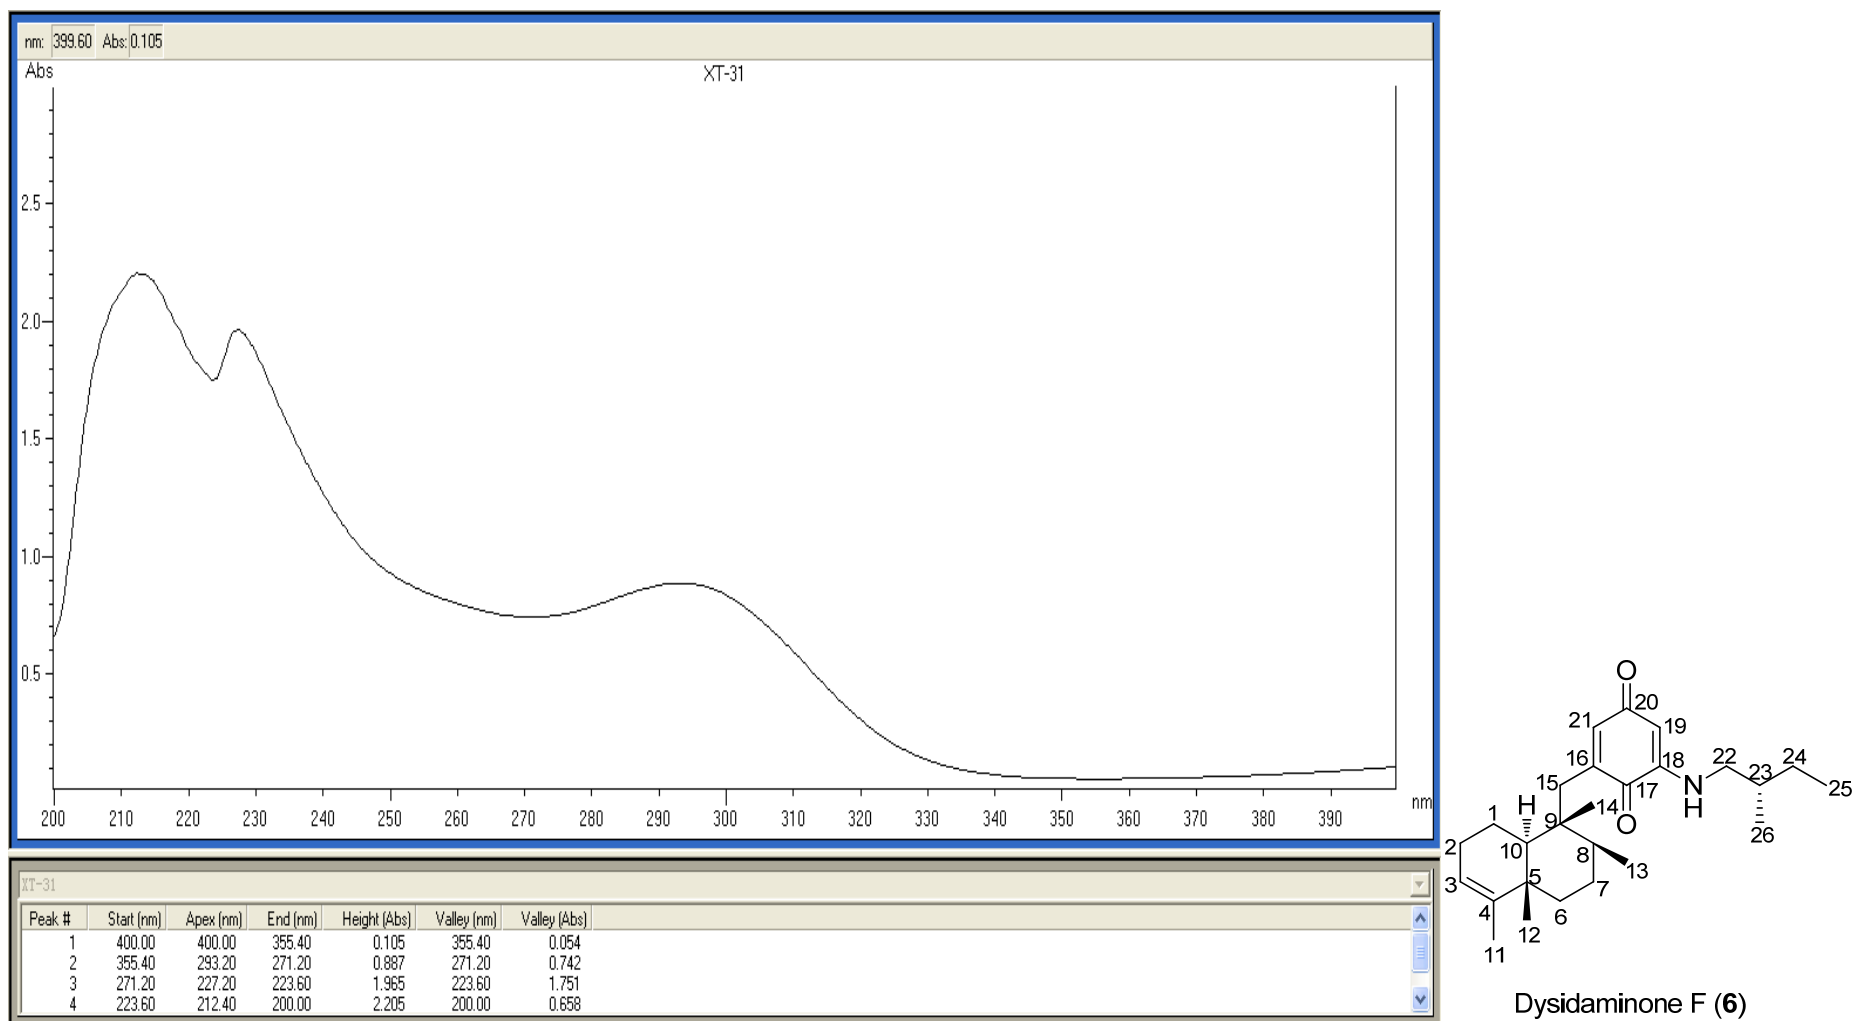

**Figure S63.** UV Spectrum of Dysidaminone F (6) in MeOH.

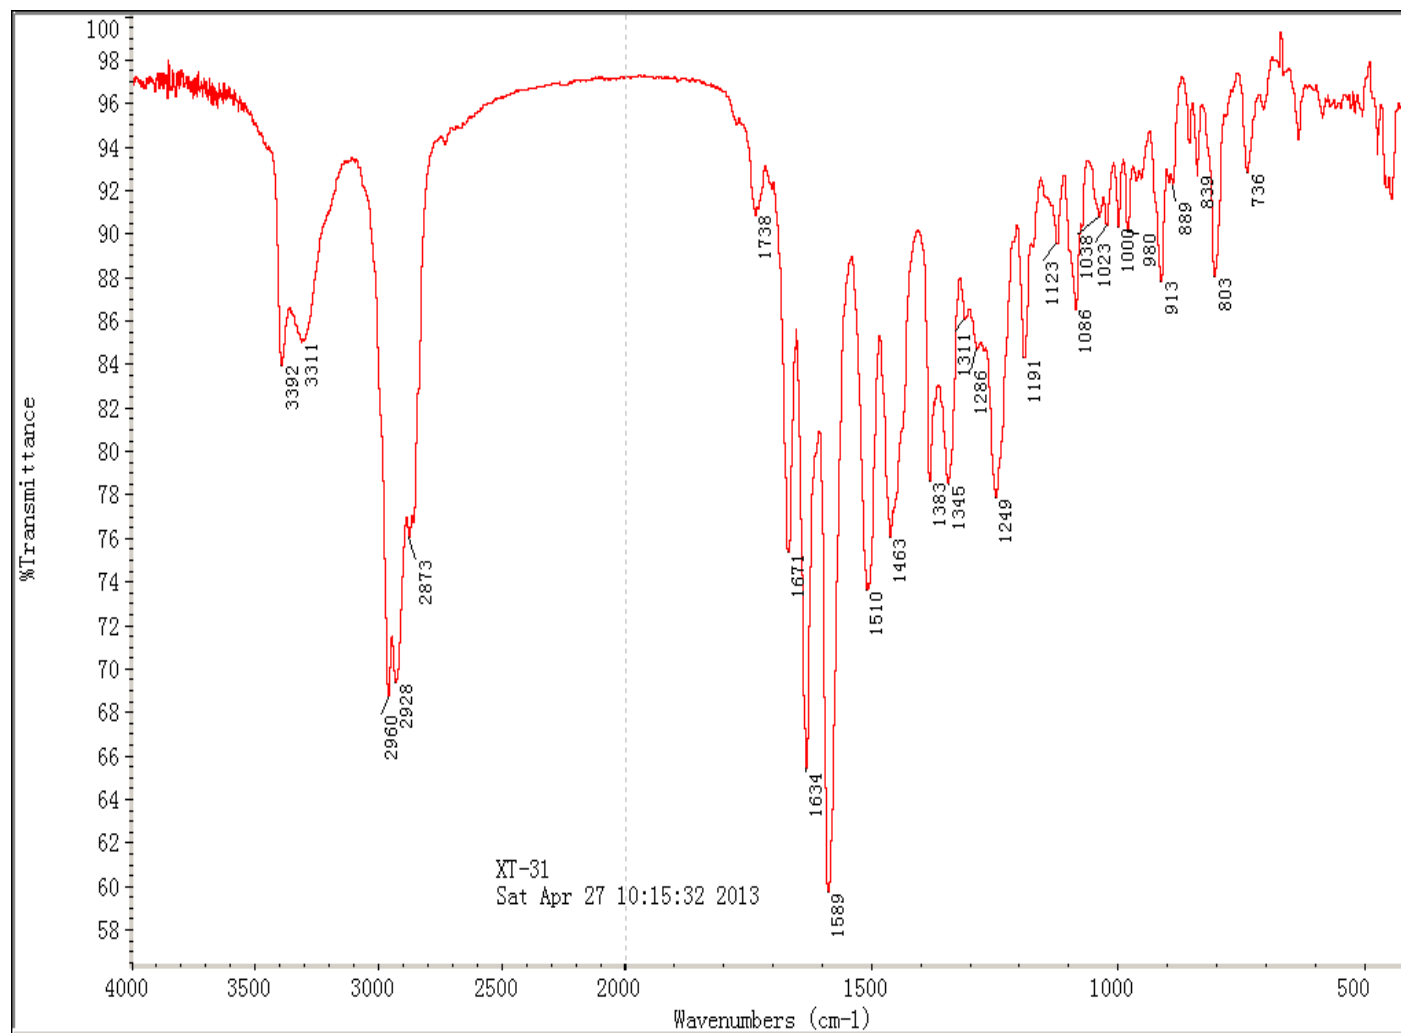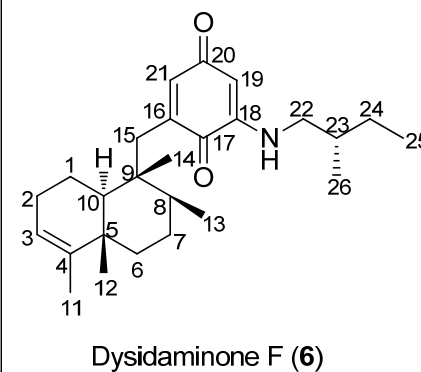

Figure S64. IR Spectrum of Dysidaminone F (6).

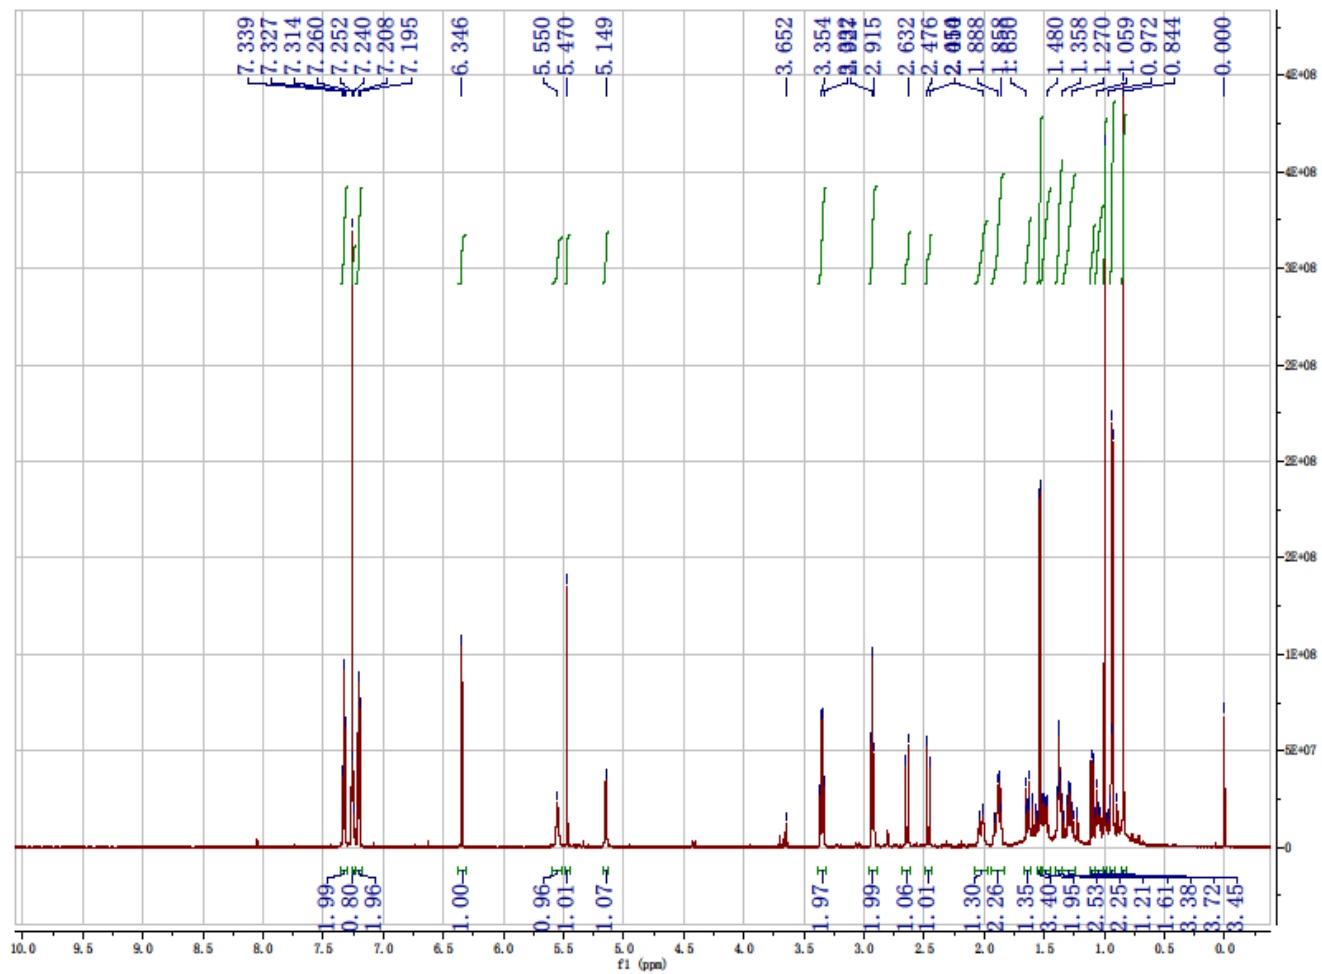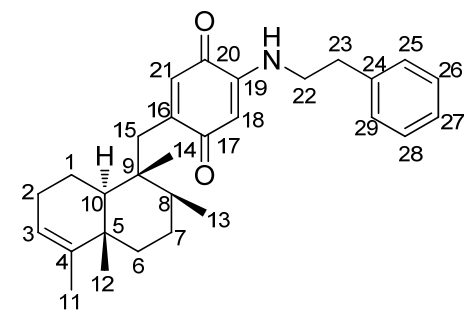

Dysidaminone G (7)

Figure S65.  $^1\text{H}$  NMR Spectrum of Dysidaminone G (7) in  $\text{CDCl}_3$ .

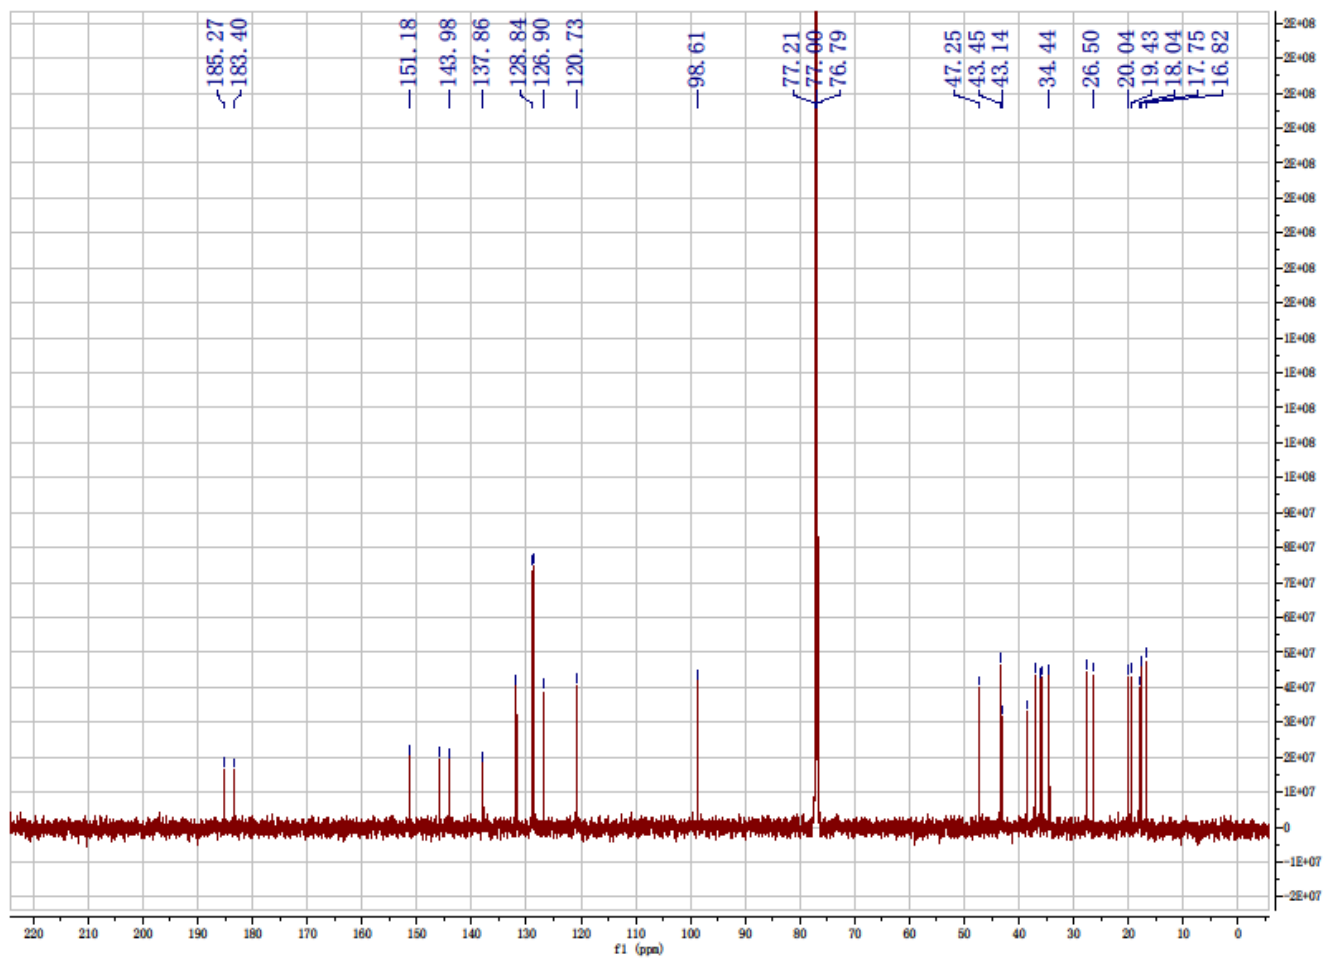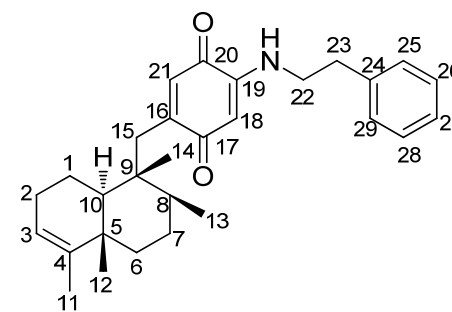

Dysidaminone G (7)

Figure S66.  $^{13}\text{C}$  NMR Spectrum of Dysidaminone G (7) in  $\text{CDCl}_3$ .



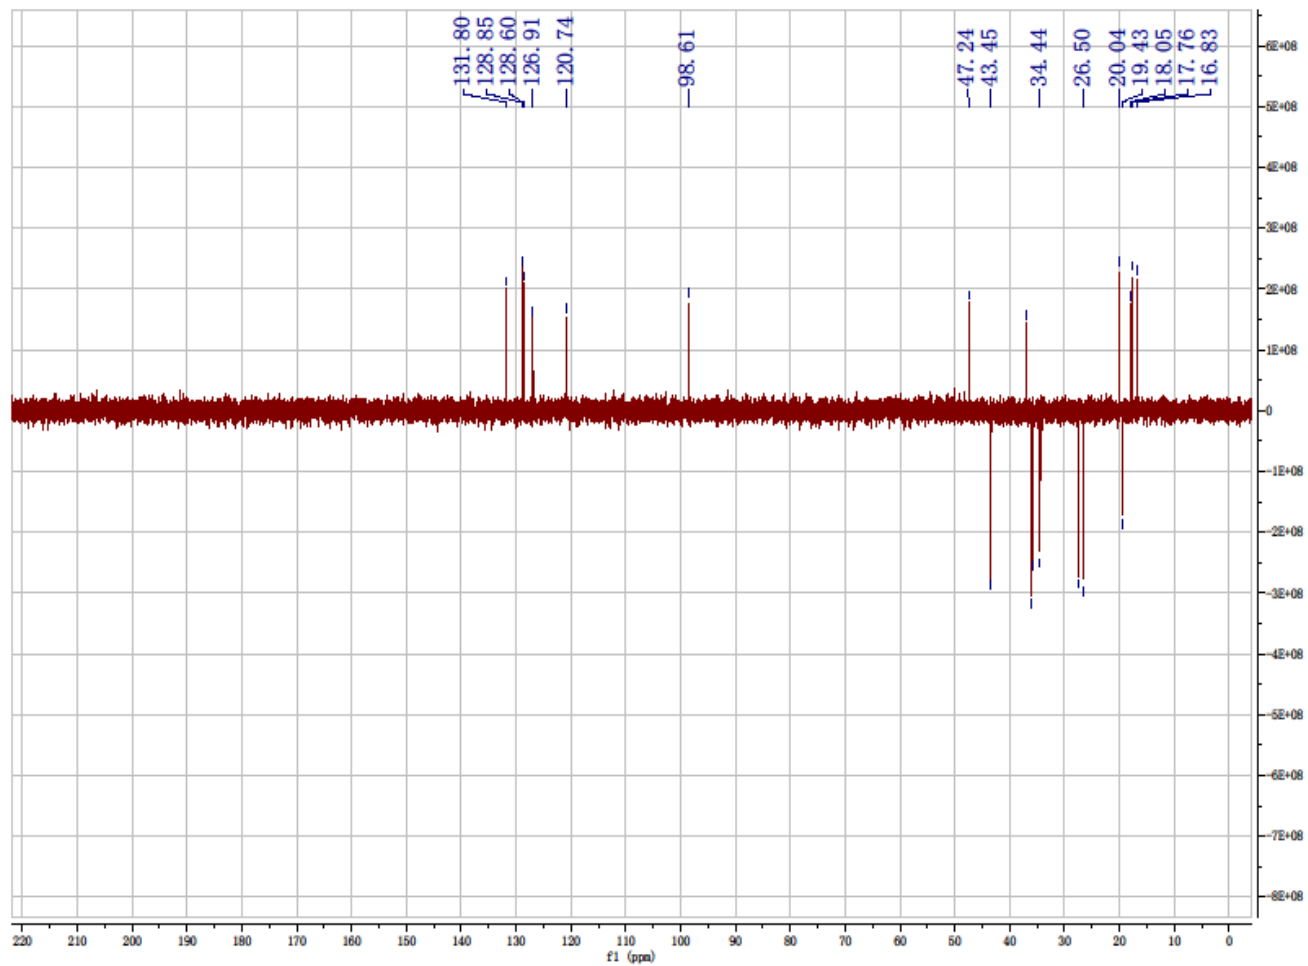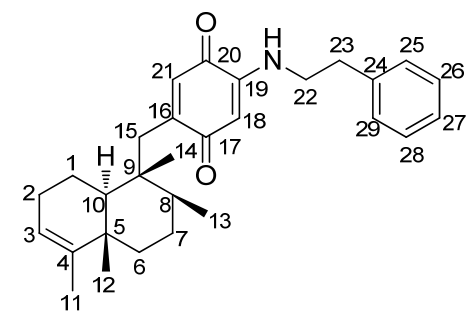

Dysidaminone G (7)

Figure S67. DEPT135 Spectrum of Dysidaminone G (7) in CDCl<sub>3</sub>.

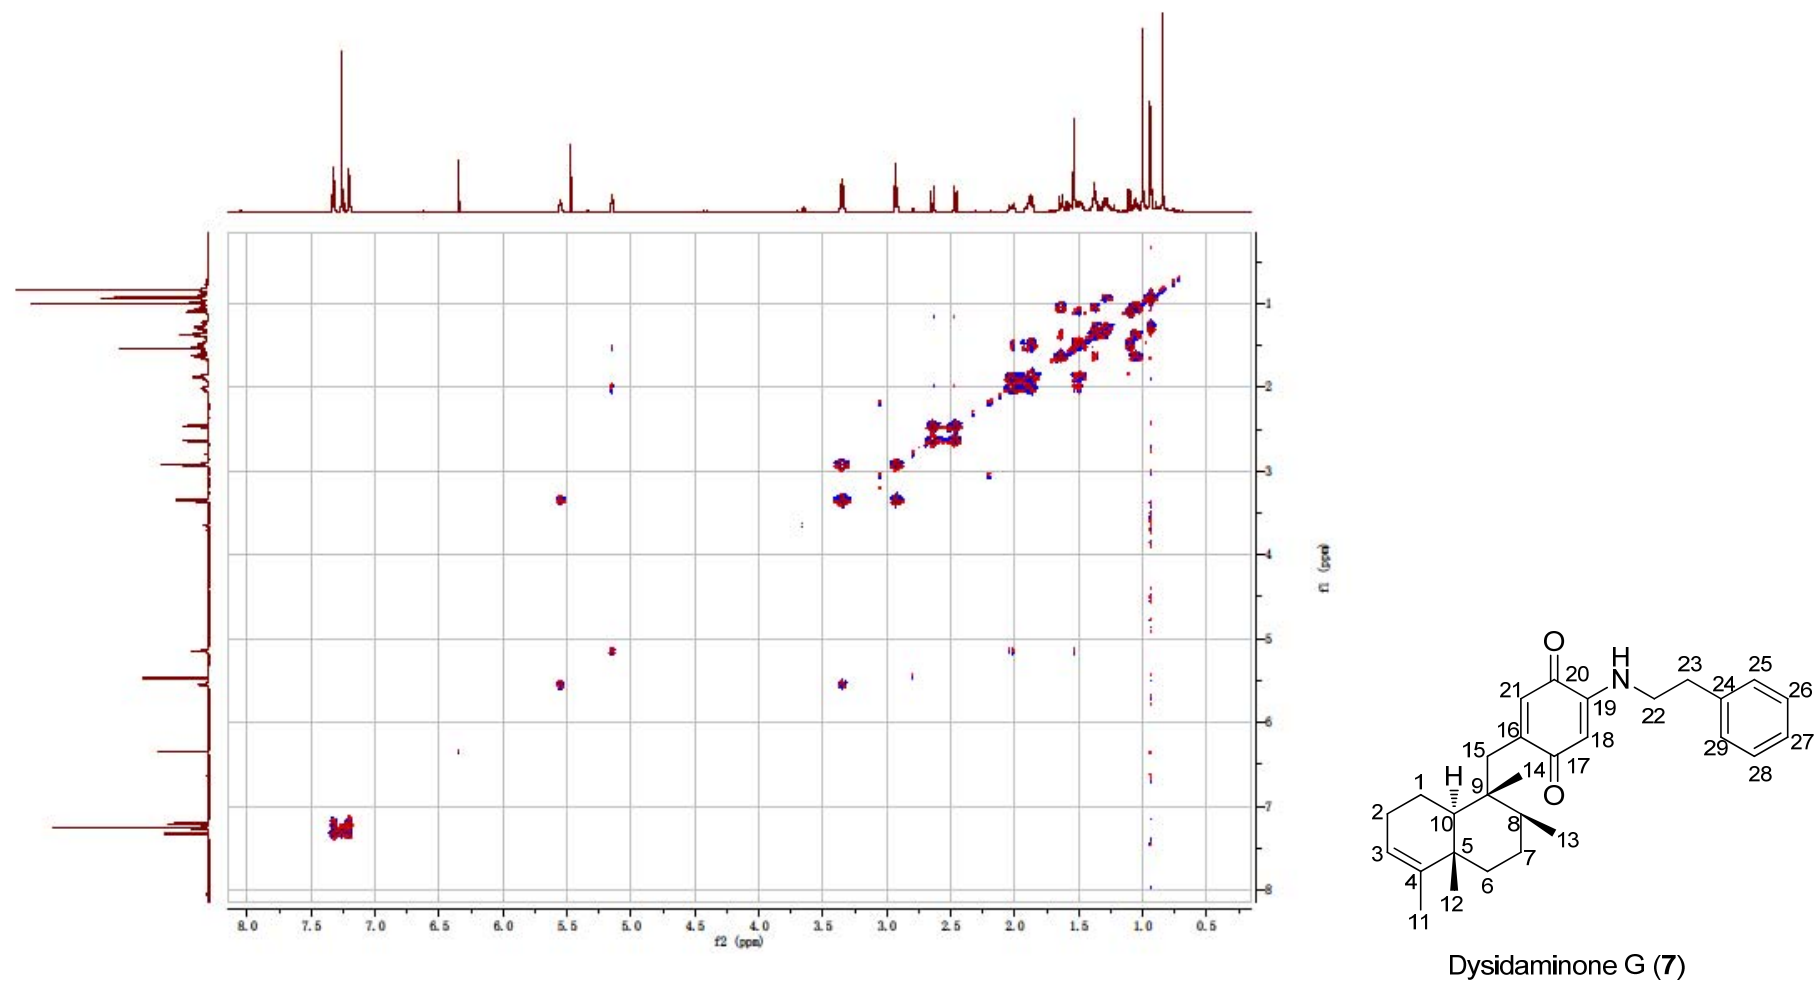

**Figure S68.**  $^1\text{H}$ - $^1\text{H}$  COSY Spectrum of Dysidaminone G (7) in  $\text{CDCl}_3$ .

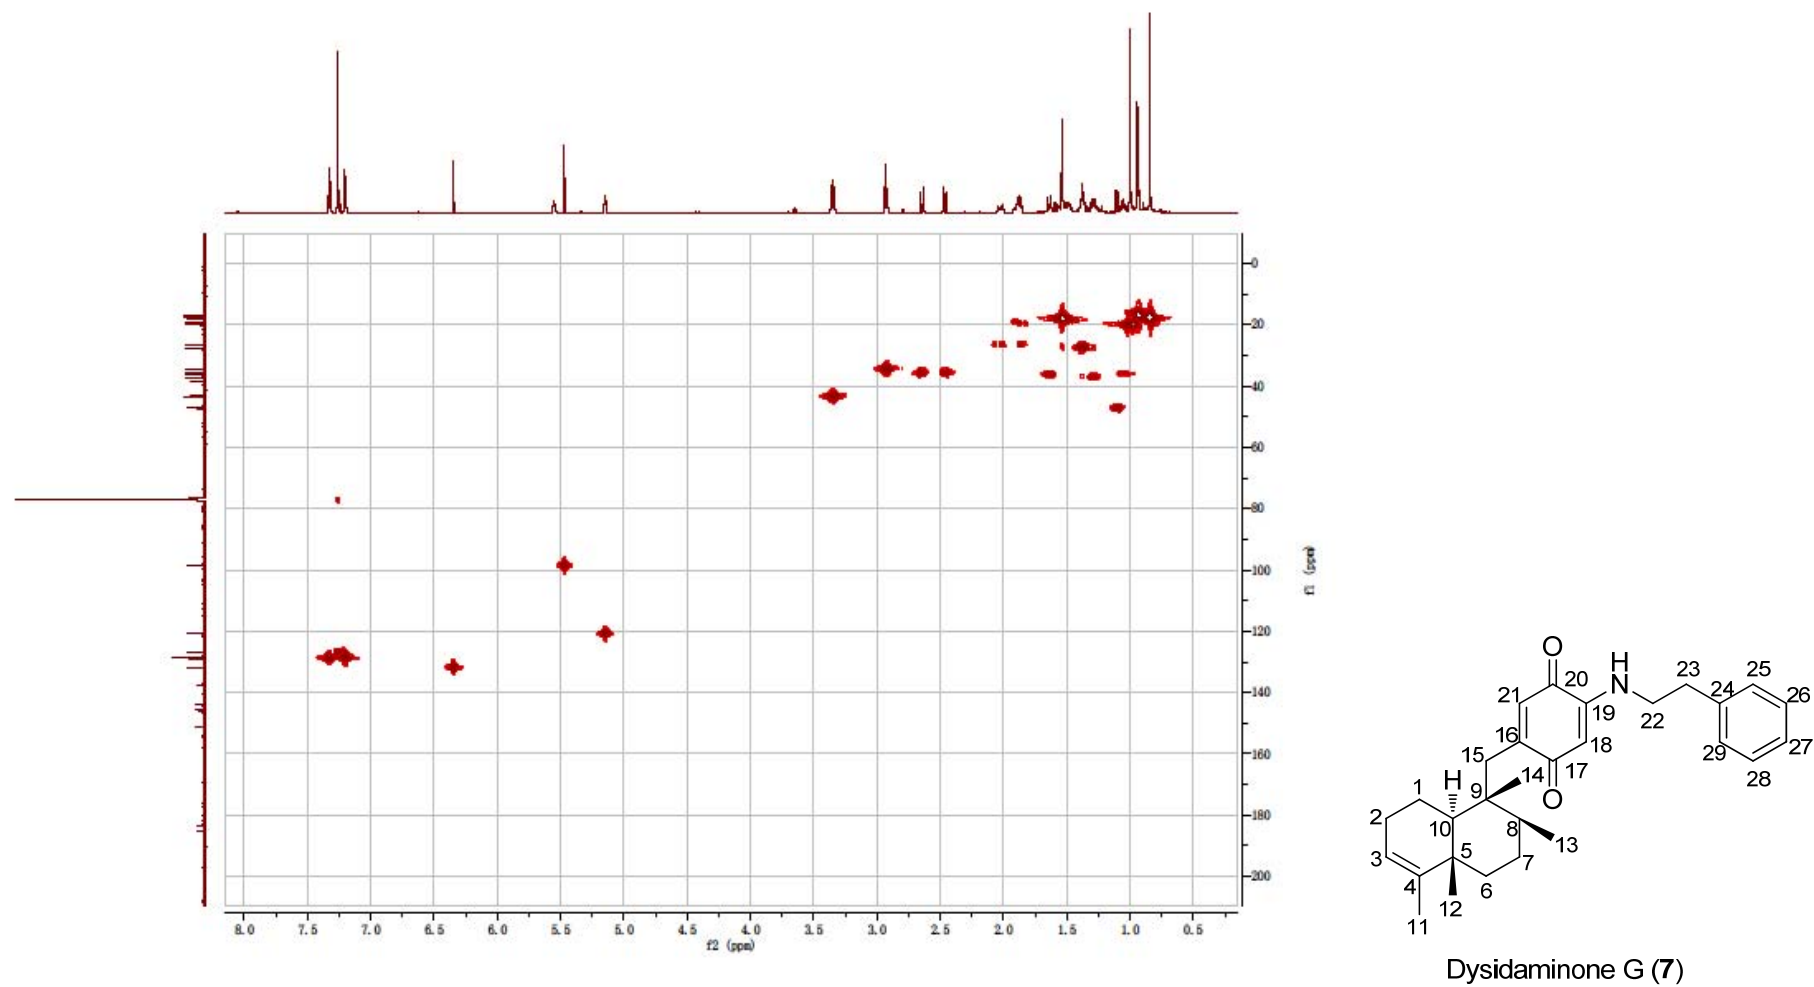

**Figure S69.** HSQC Spectrum of Dysidaminone G (7) in CDCl<sub>3</sub>.

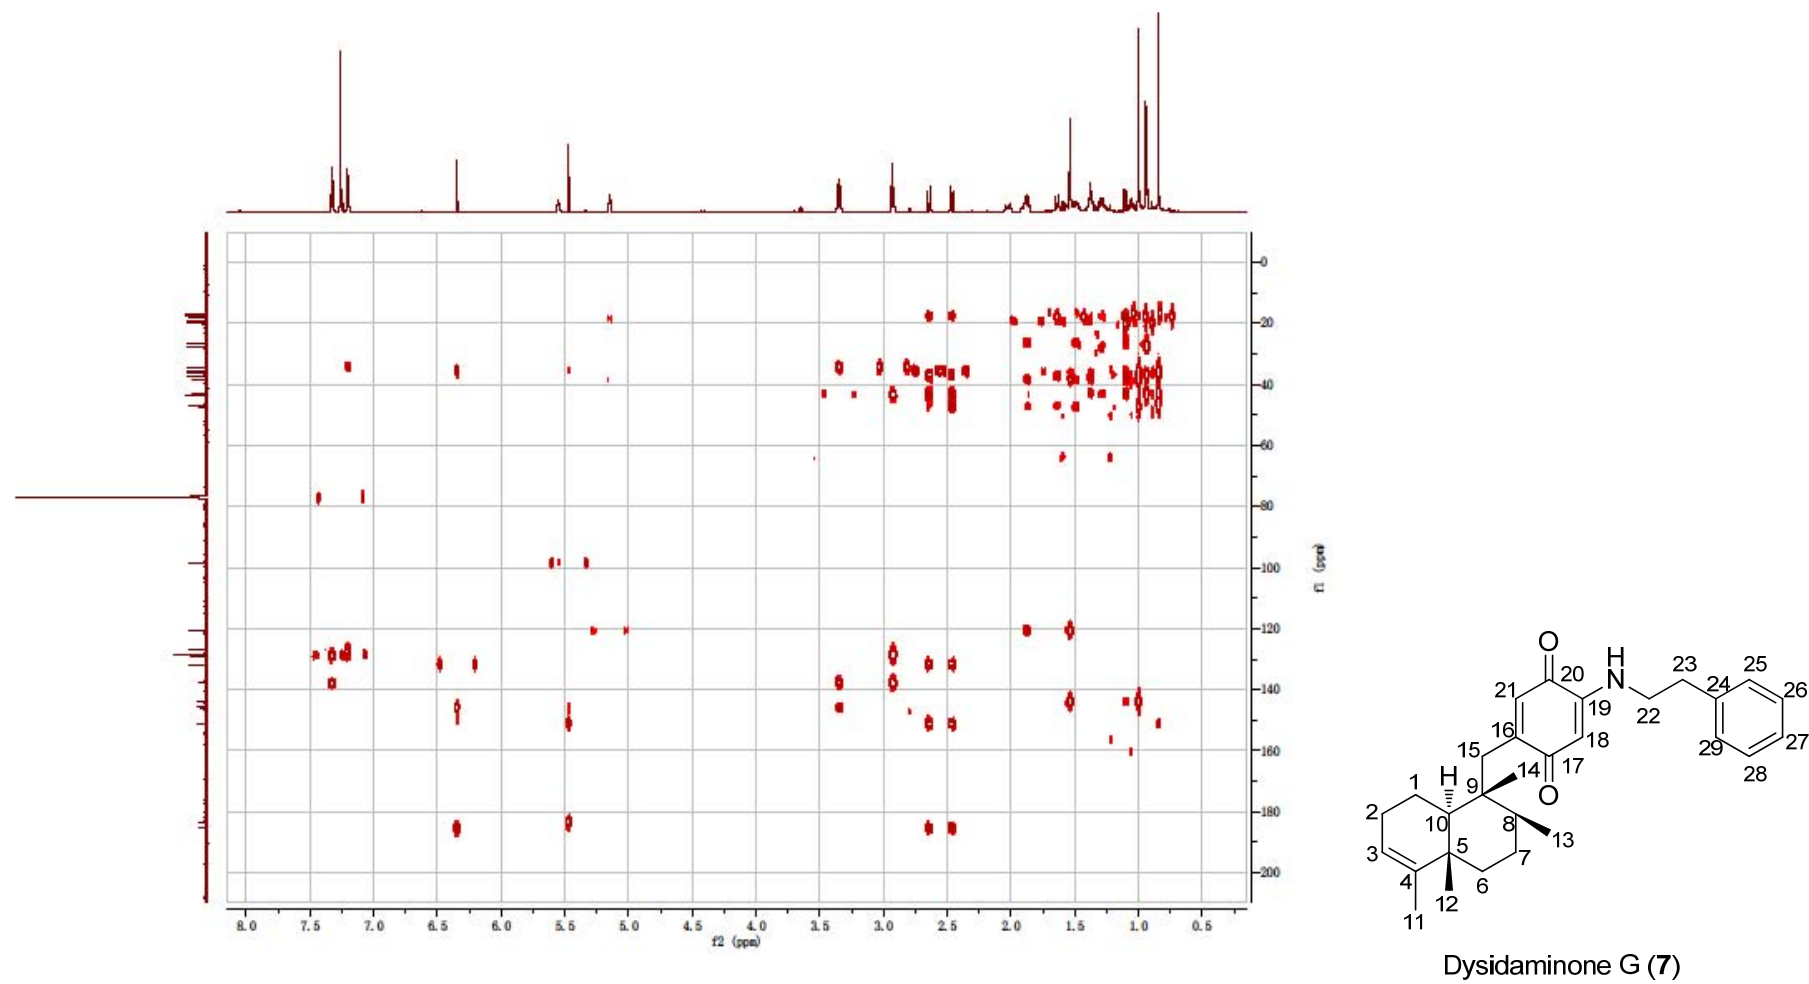

**Figure S70.** HMBC Spectrum of Dysidaminone G (7) in CDCl<sub>3</sub>.

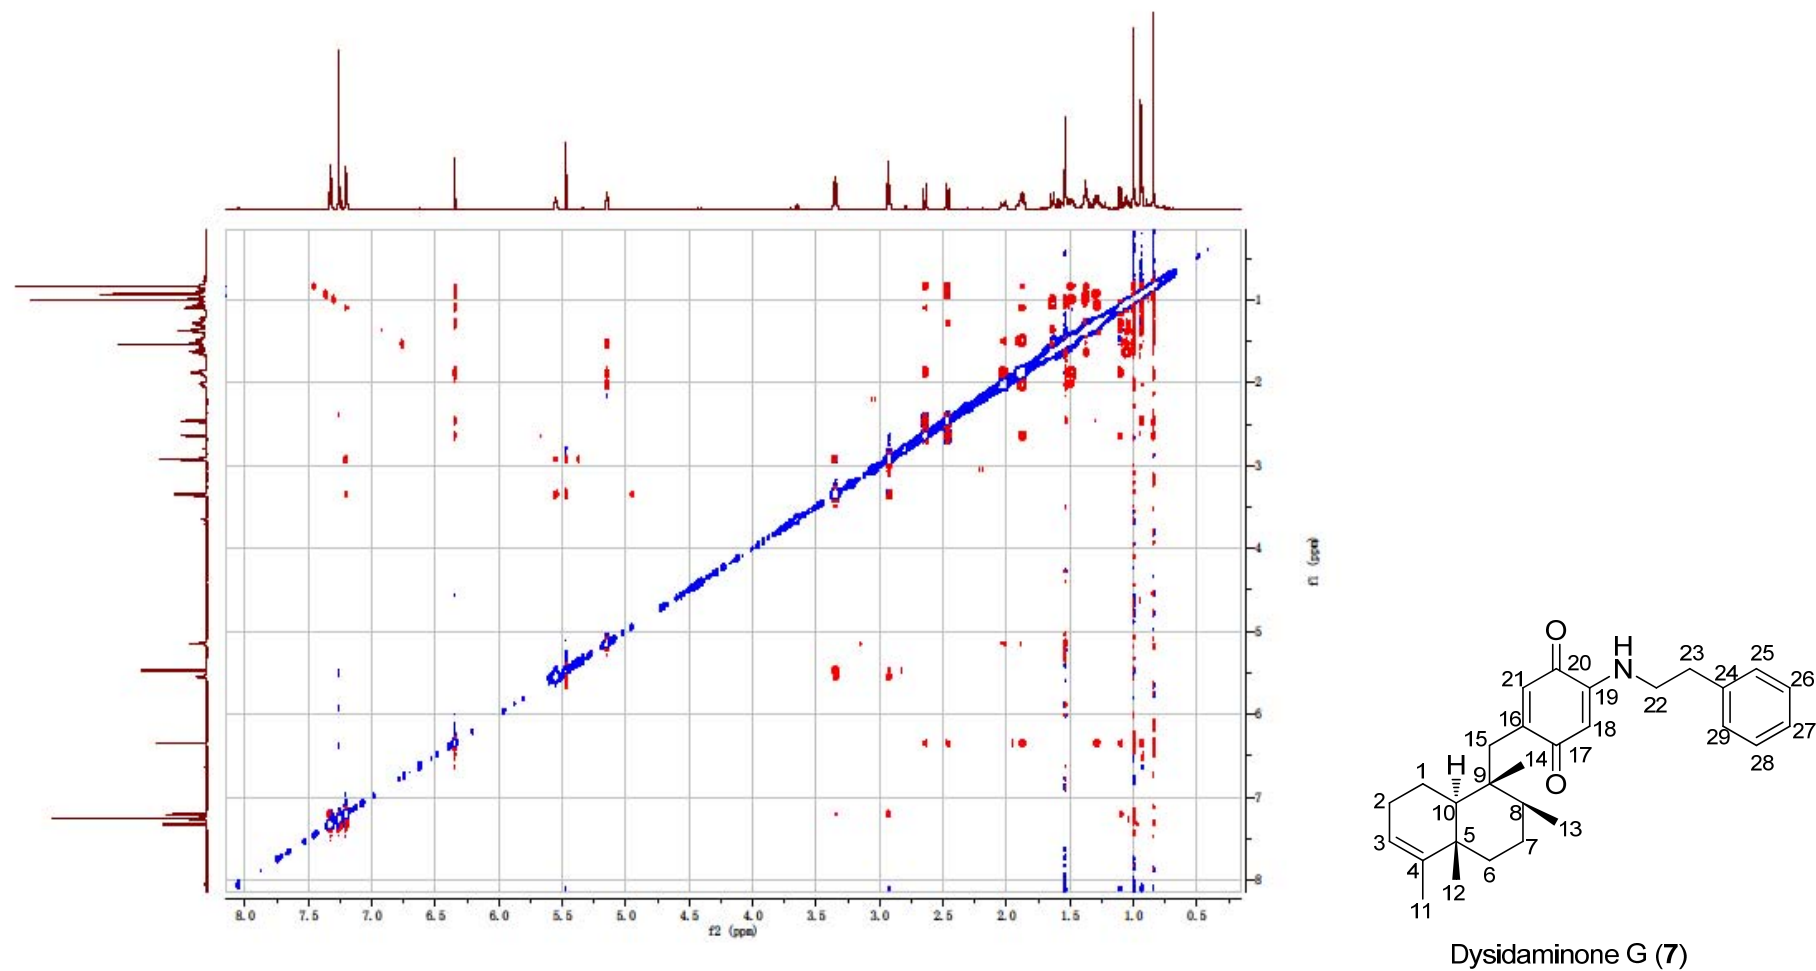

**Figure S71.** NOESY Spectrum of Dysidaminone G (7) in CDCl<sub>3</sub>.

## Elemental Composition Report

Page 1

Tolerance = 5.0 PPM / DBE: min = -1.5, max = 50.0  
Selected filters: None

Monoisotopic Mass, Even Electron Ions  
7 formula(e) evaluated with 1 results within limits (up to 50 closest results for each mass)

Elements Used:

C: 10-30 H: 10-40 N: 1-1 O: 1-4

SIPI

XT-30 M.W=431

WQ13-099H 31 (1.070) AM (Cen,4, 80.00, Ar,5000.0,425.05,0.70); Sm (SG, 2x3.00); Cm (23:33)

Q-ToF micro

YA019

432.2901

30-Apr-2013,13:57:38

TOF MS ES+  
1.97e4

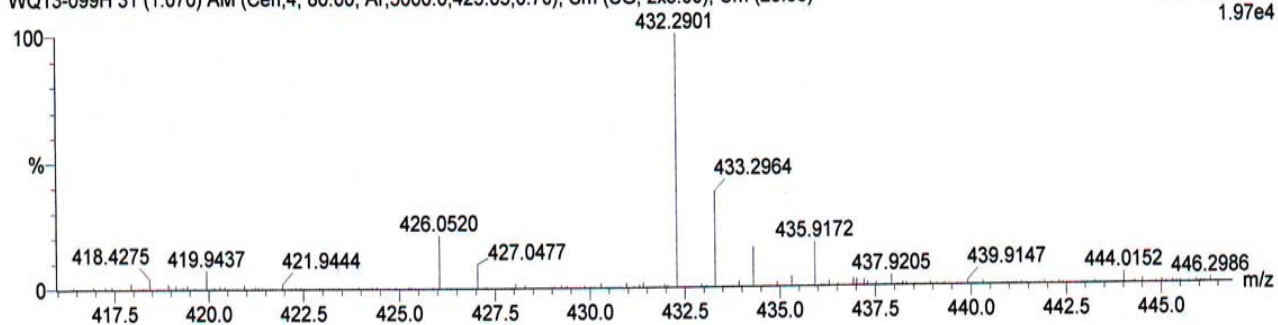

| Mass     | RA     | Calc. Mass | mDa  | PPM  | DBE  | i-FIT | Formula                                          |
|----------|--------|------------|------|------|------|-------|--------------------------------------------------|
| 432.2901 | 100.00 | 432.2903   | -0.2 | -0.5 | 11.5 | 615.0 | C <sub>29</sub> H <sub>38</sub> N O <sub>2</sub> |

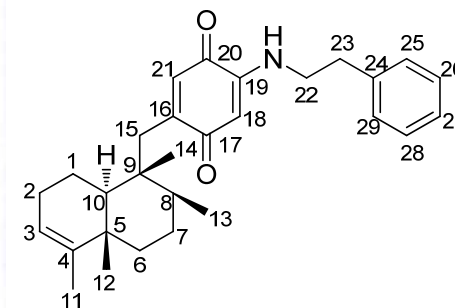

Dysidaminone G (7)

Figure S72. HRESIMS of Dysidaminone G (7).

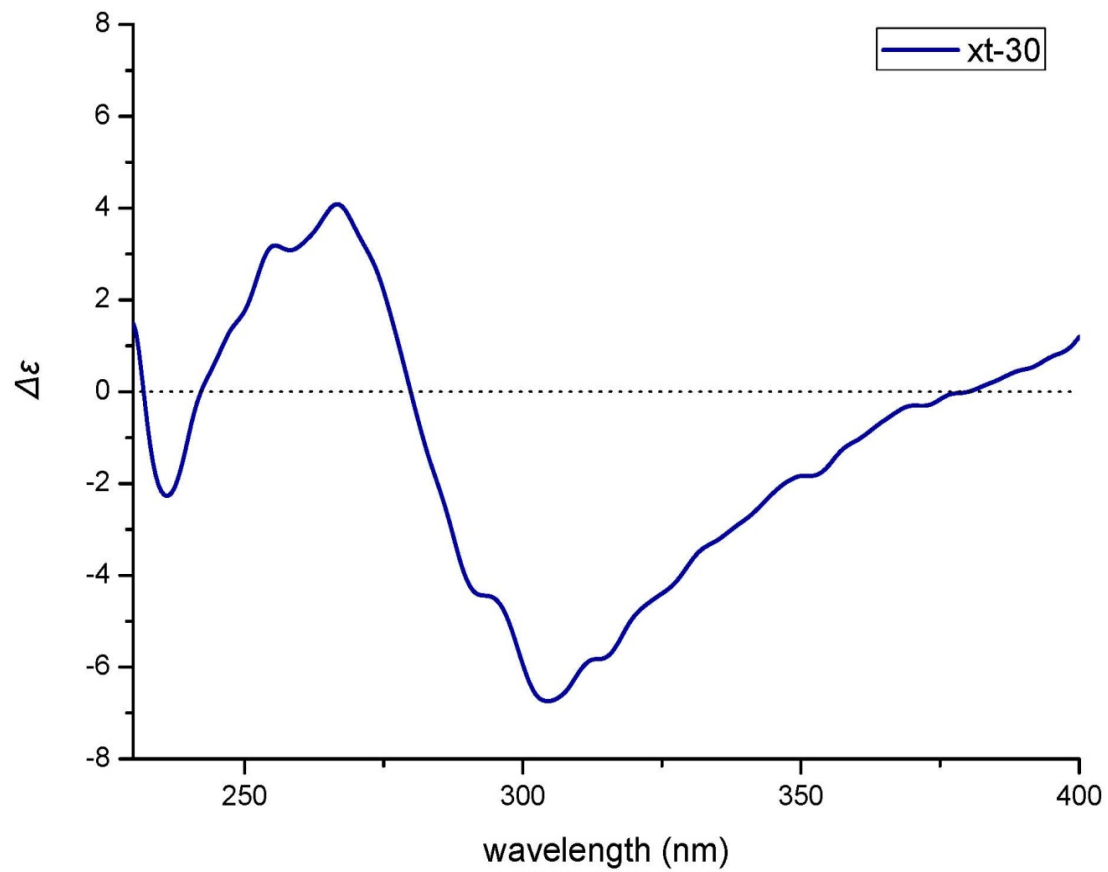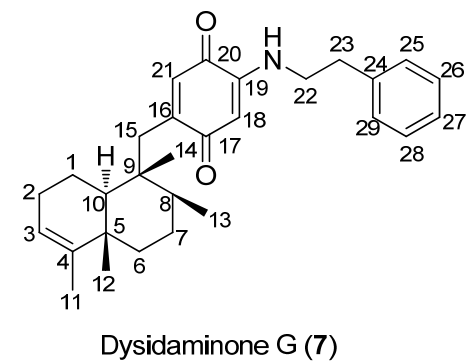

**Figure S73.** CD Spectrum of Dysidaminone G (7) in MeOH.

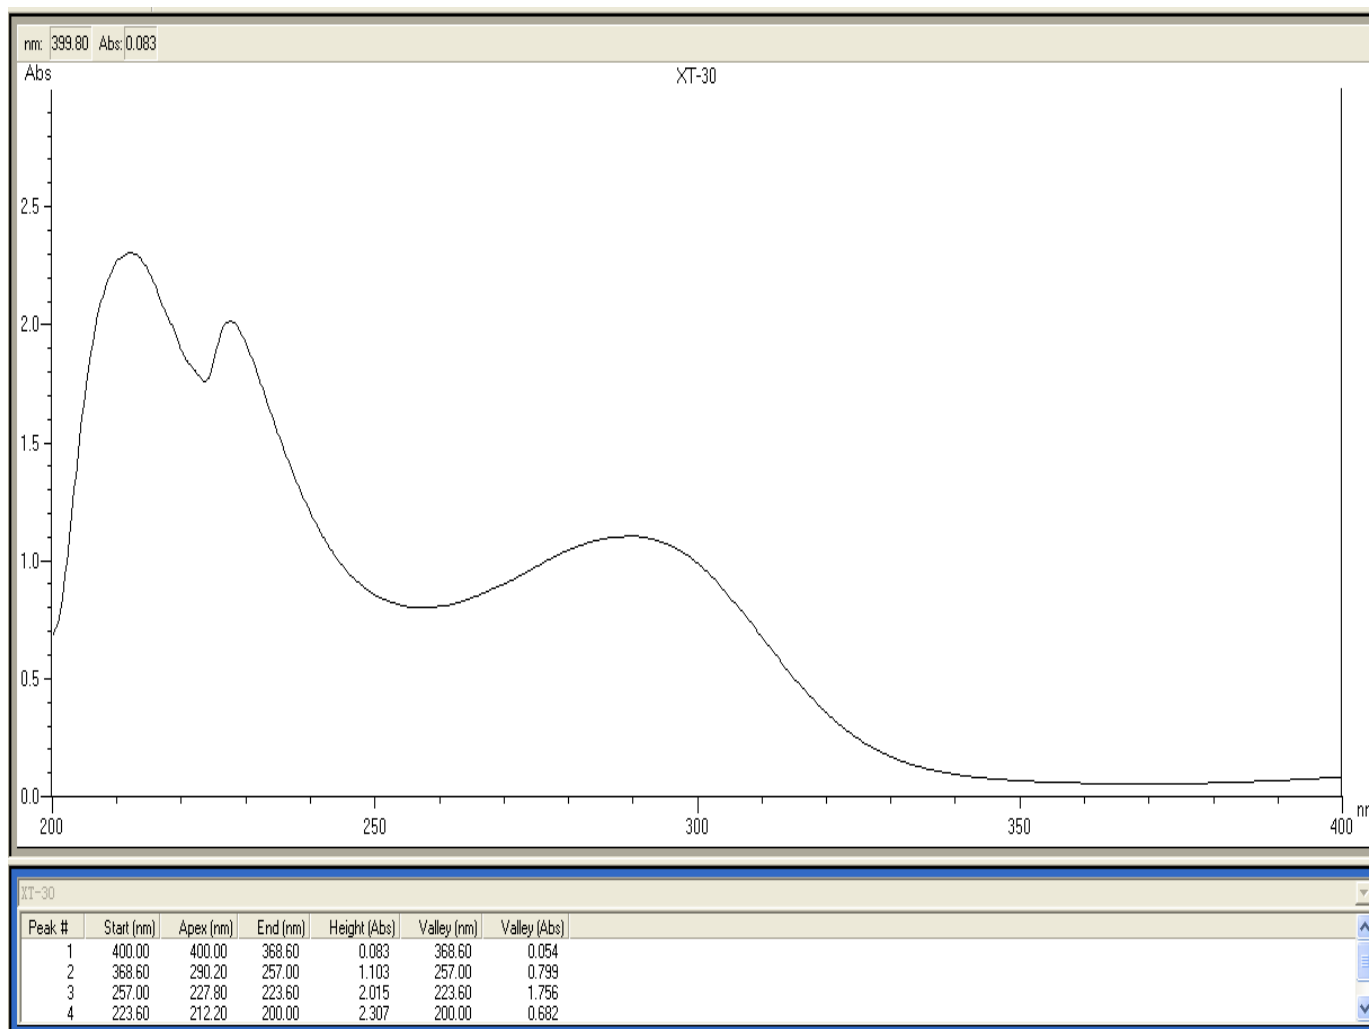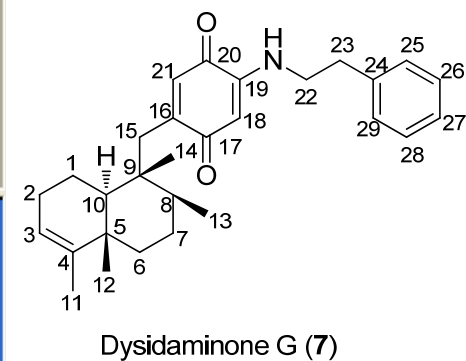

**Figure S74.** UV Spectrum of Dysidaminone G (7) in MeOH.



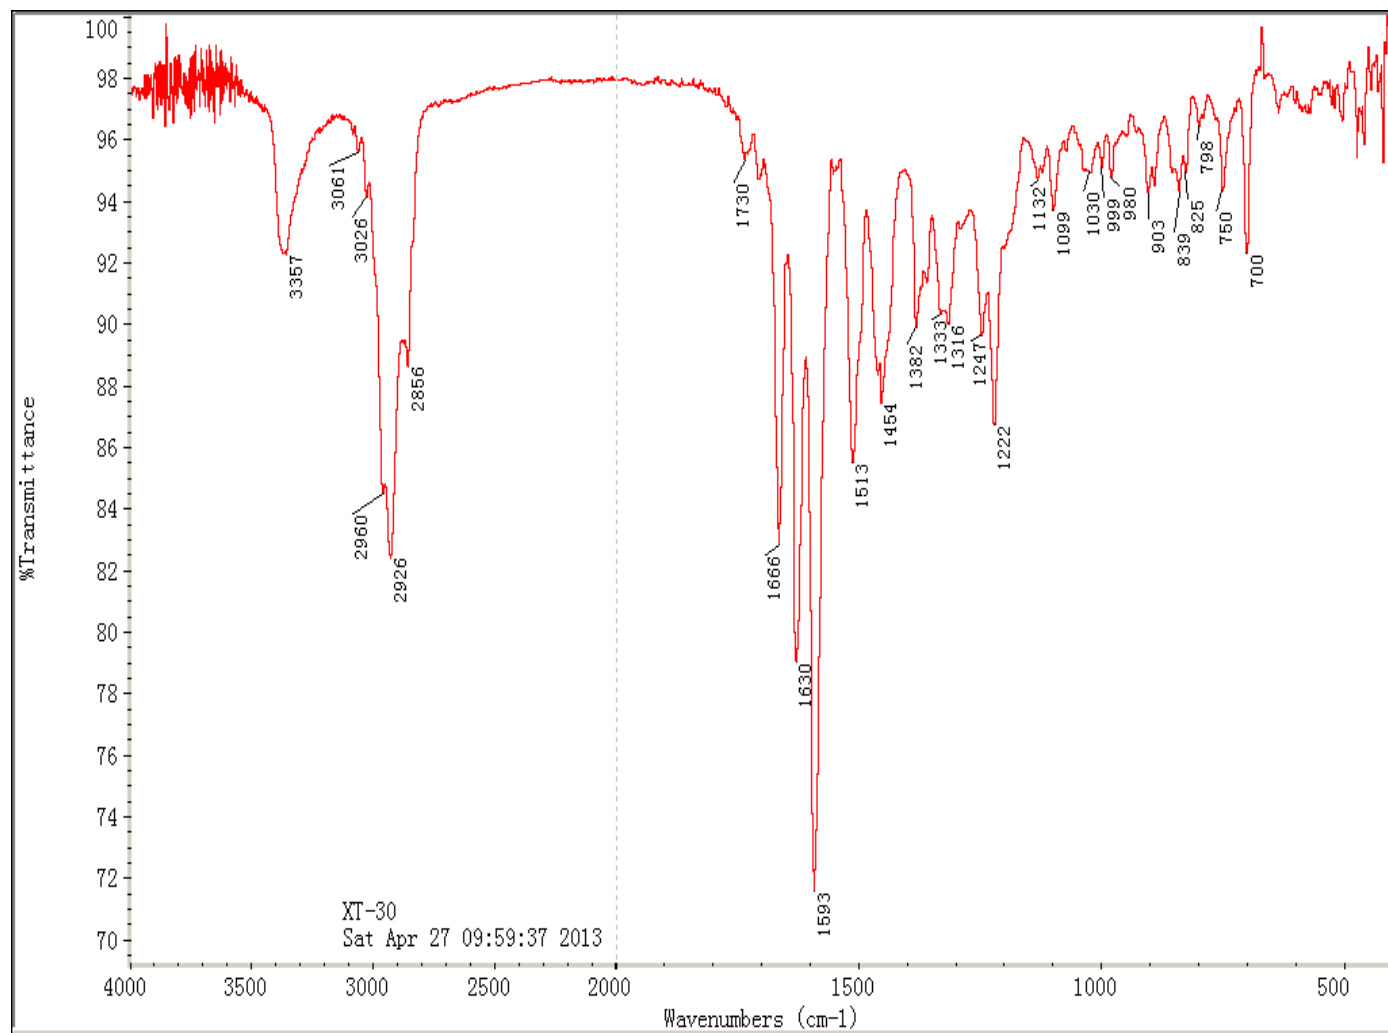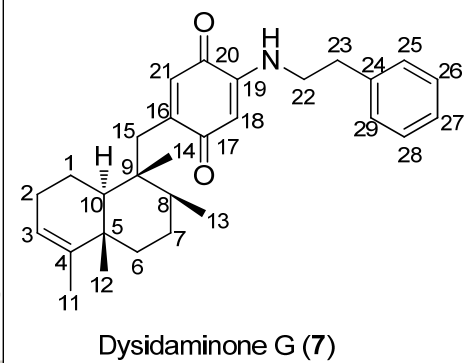

**Figure S75.** IR Spectrum of Dysidaminone G (7).

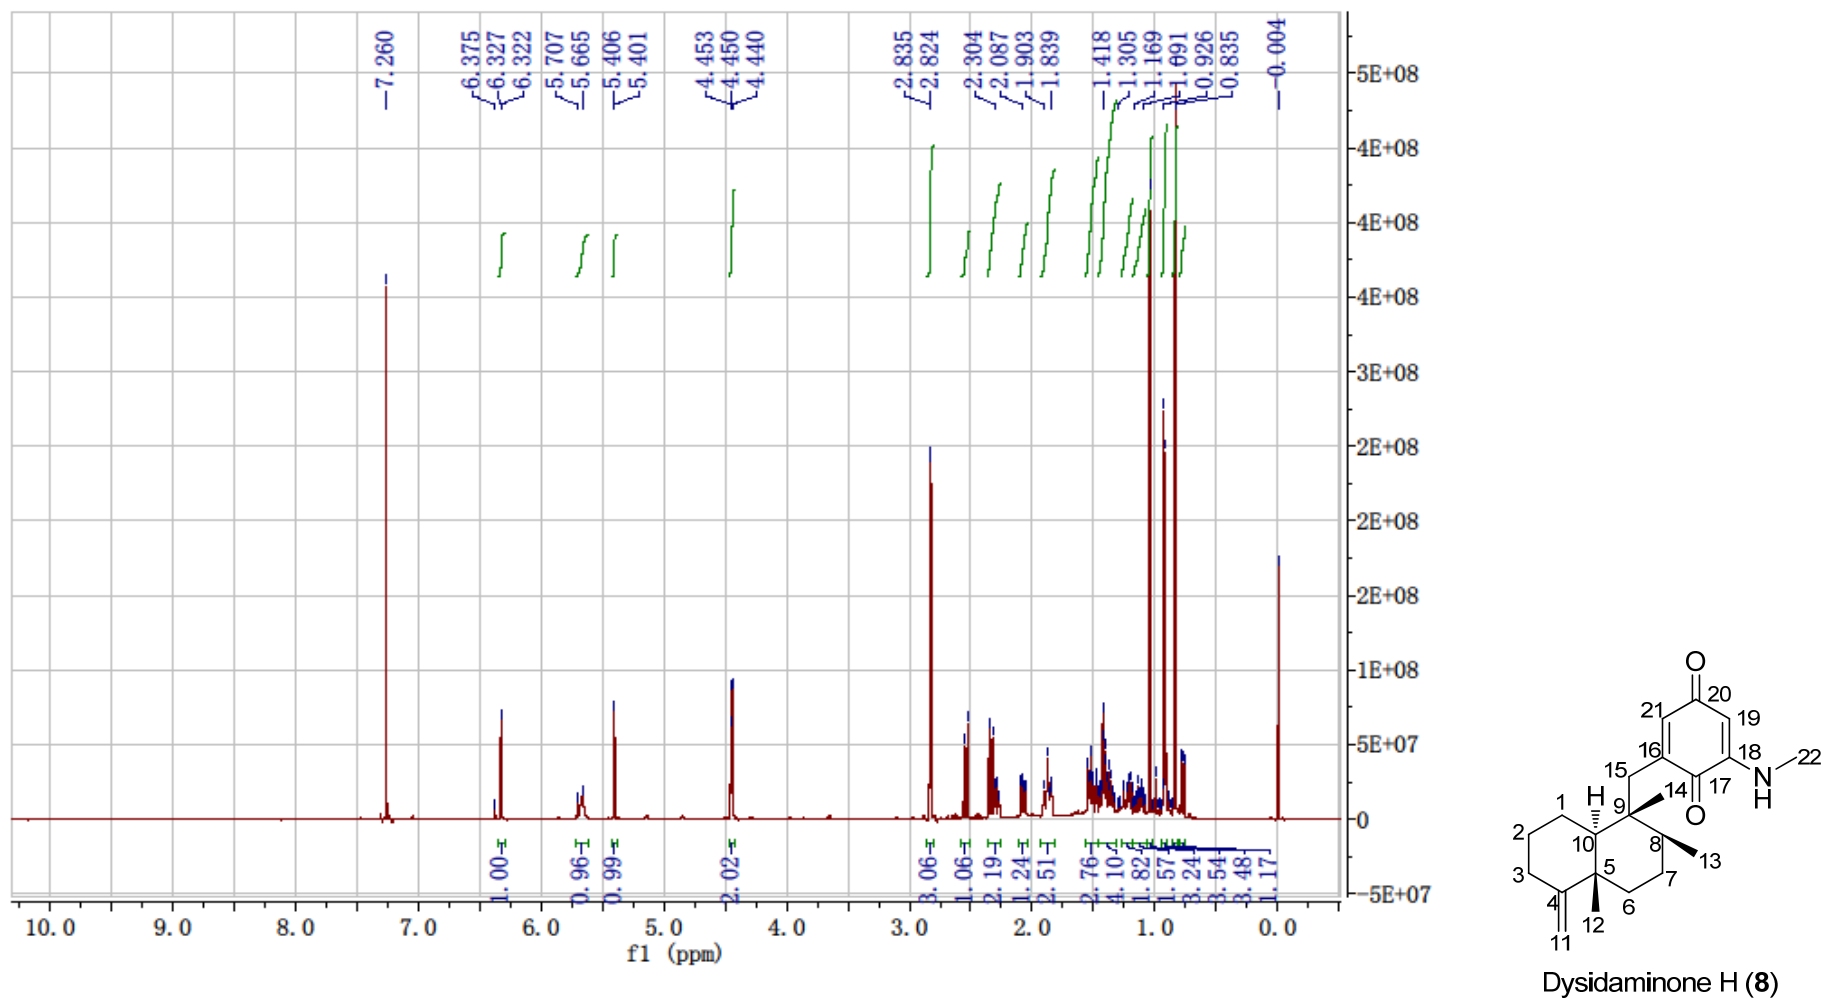

**Figure S76.** <sup>1</sup>H NMR Spectrum of Dysidaminone H (8) in CDCl<sub>3</sub>.

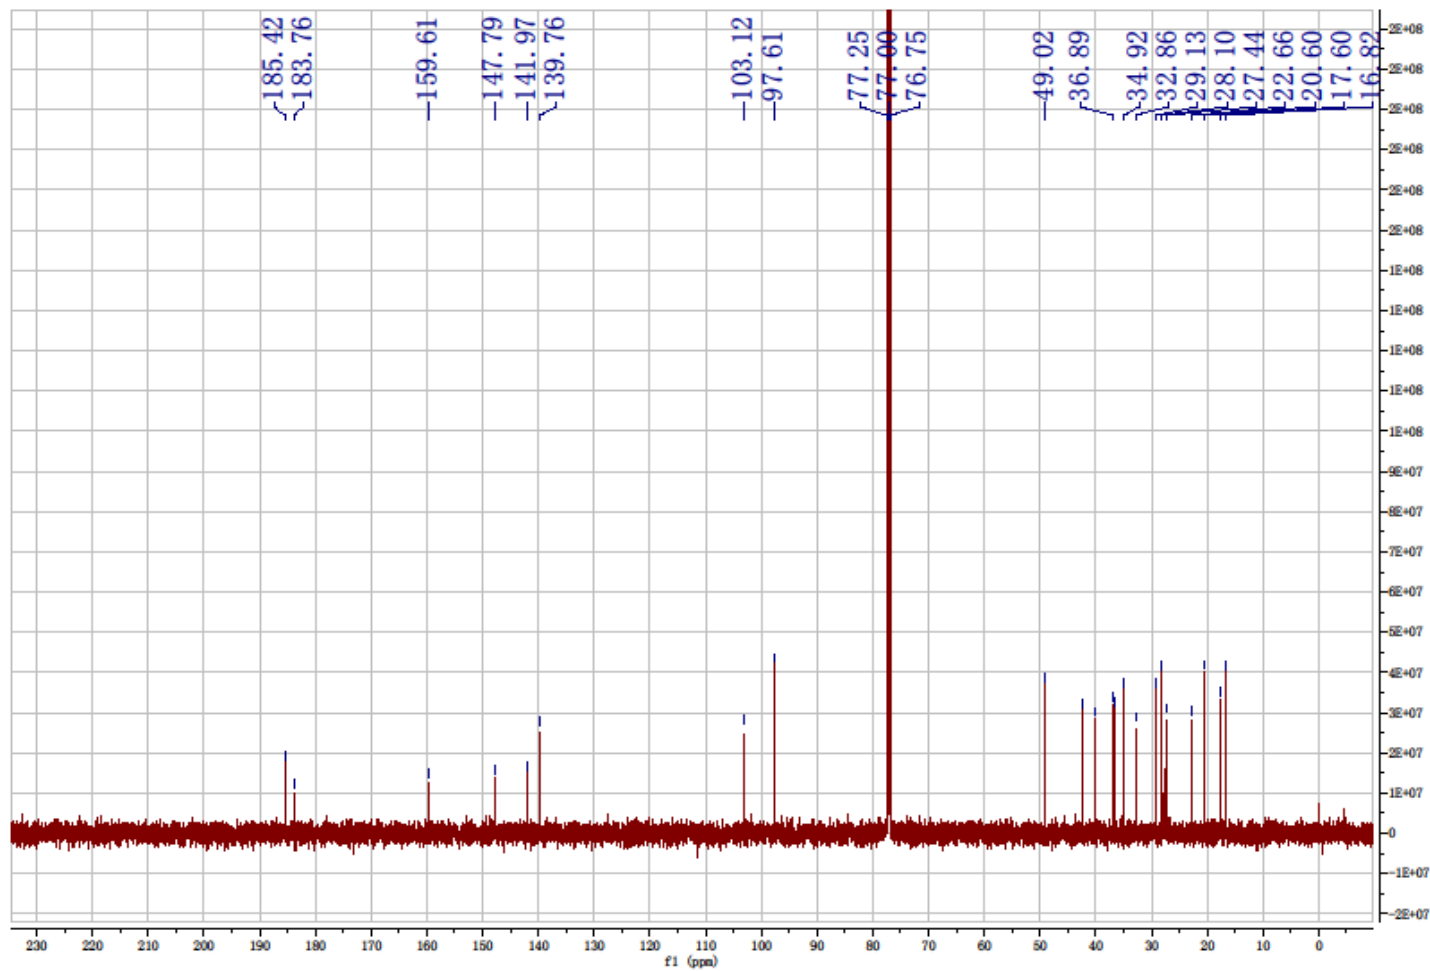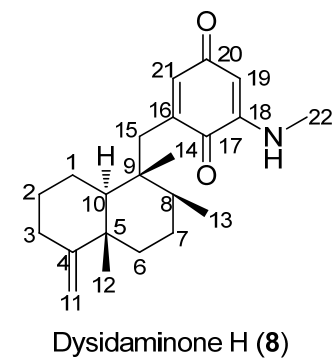

**Figure S77.**  $^{13}\text{C}$  NMR Spectrum of Dysidaminone H (8) in  $\text{CDCl}_3$ .

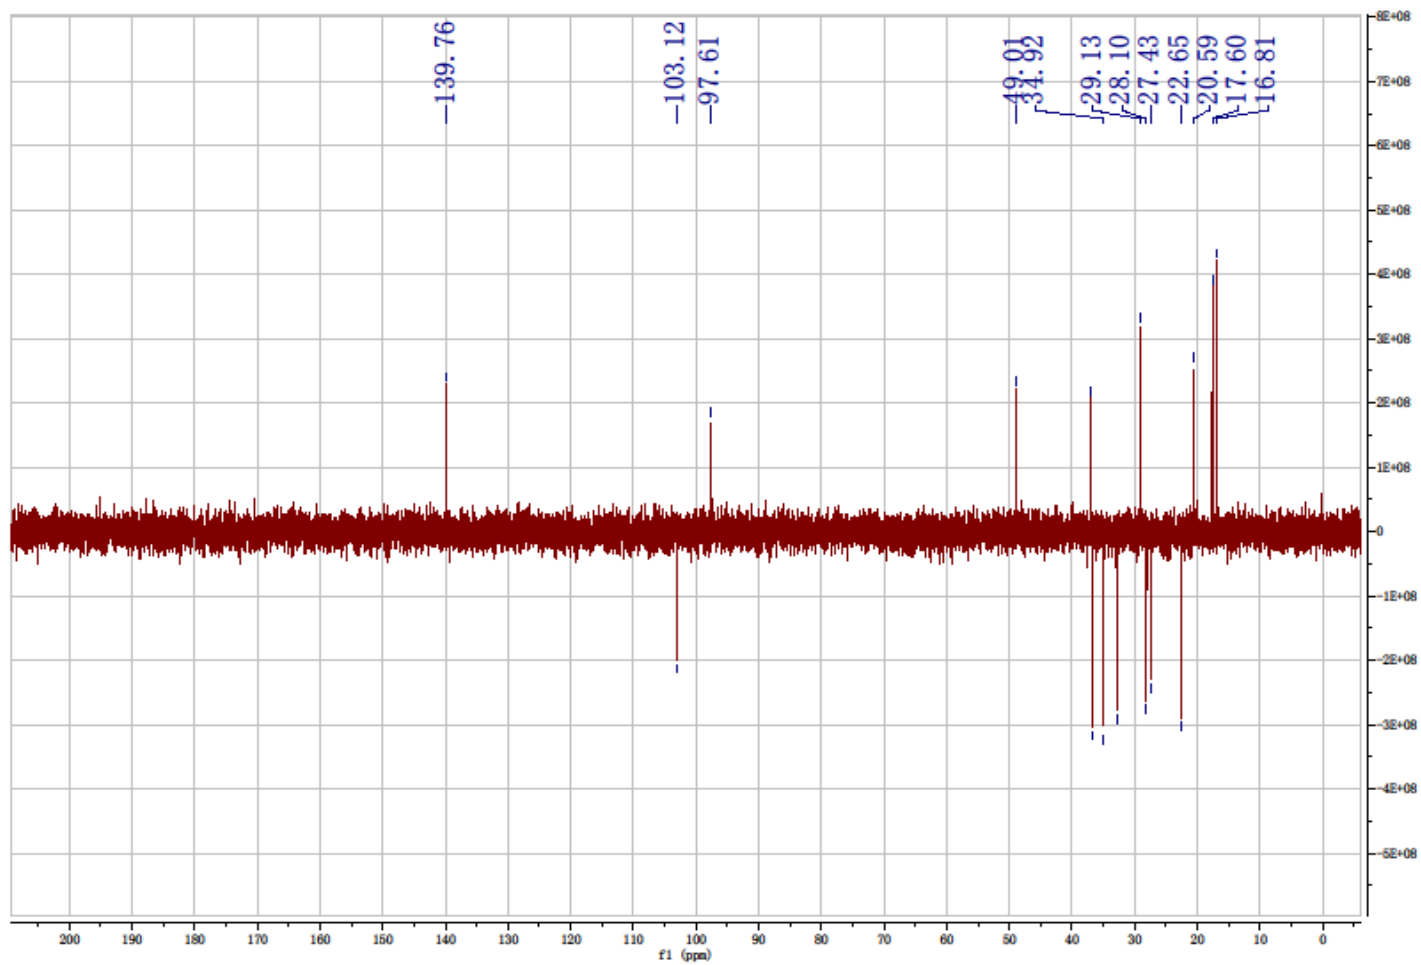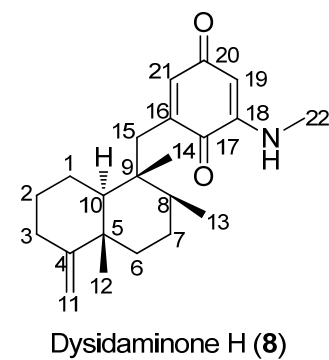

Figure S78. DEPT135 Spectrum of Dysidaminone H (8) in CDCl<sub>3</sub>.

## Elemental Composition Report

Page 1

Tolerance = 10.0 PPM / DBE: min = -1.5, max = 50.0

Selected filters: None

Monoisotopic Mass, Even Electron Ions

22 formula(e) evaluated with 1 results within limits (up to 50 closest results for each mass)

Elements Used:

C: 10-24 H: 10-40 N: 1-3 O: 1-3 Na: 1-1

SIPI

XT-35 M.W=341

WQ13-089H1 24 (0.830) AM (Cen,4, 80.00, Ar,5000.0,354.09,0.70); Sm (SG, 2x3.00); Cm (15:27)

Q-ToF micro  
YA019

22-Apr-2013,13:29:40

TOF MS ES+  
7.83e3

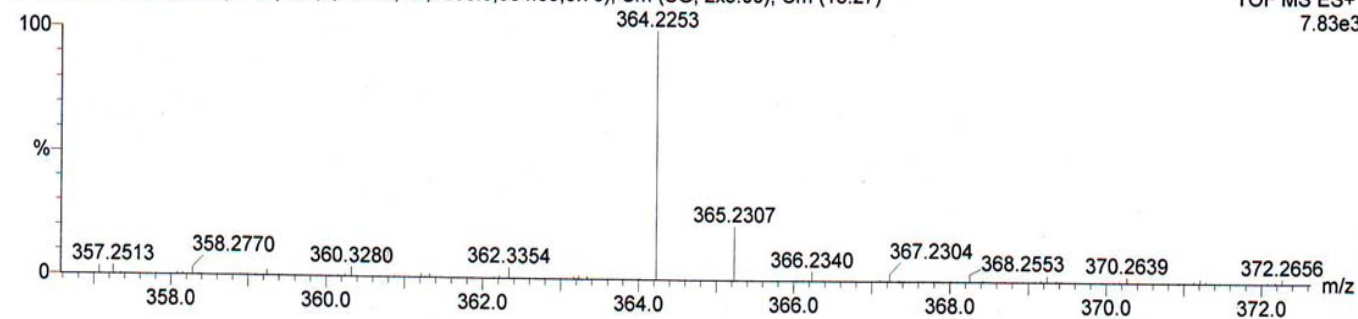

Minimum: 60.00  
Maximum: 100.00

| Mass     | RA     | Calc. Mass | mDa | PPM | DBE | i-FIT | Formula         |
|----------|--------|------------|-----|-----|-----|-------|-----------------|
| 364.2253 | 100.00 | 364.2252   | 0.1 | 0.3 | 7.5 | 20.7  | C22 H31 N O2 Na |

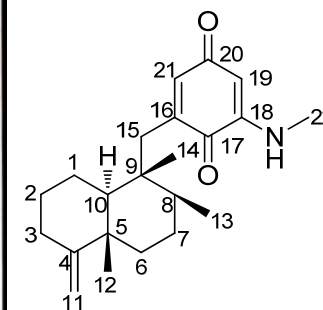

Dysidaminone H (8)

Figure S79. HRESIMS of Dysidaminone H (8).

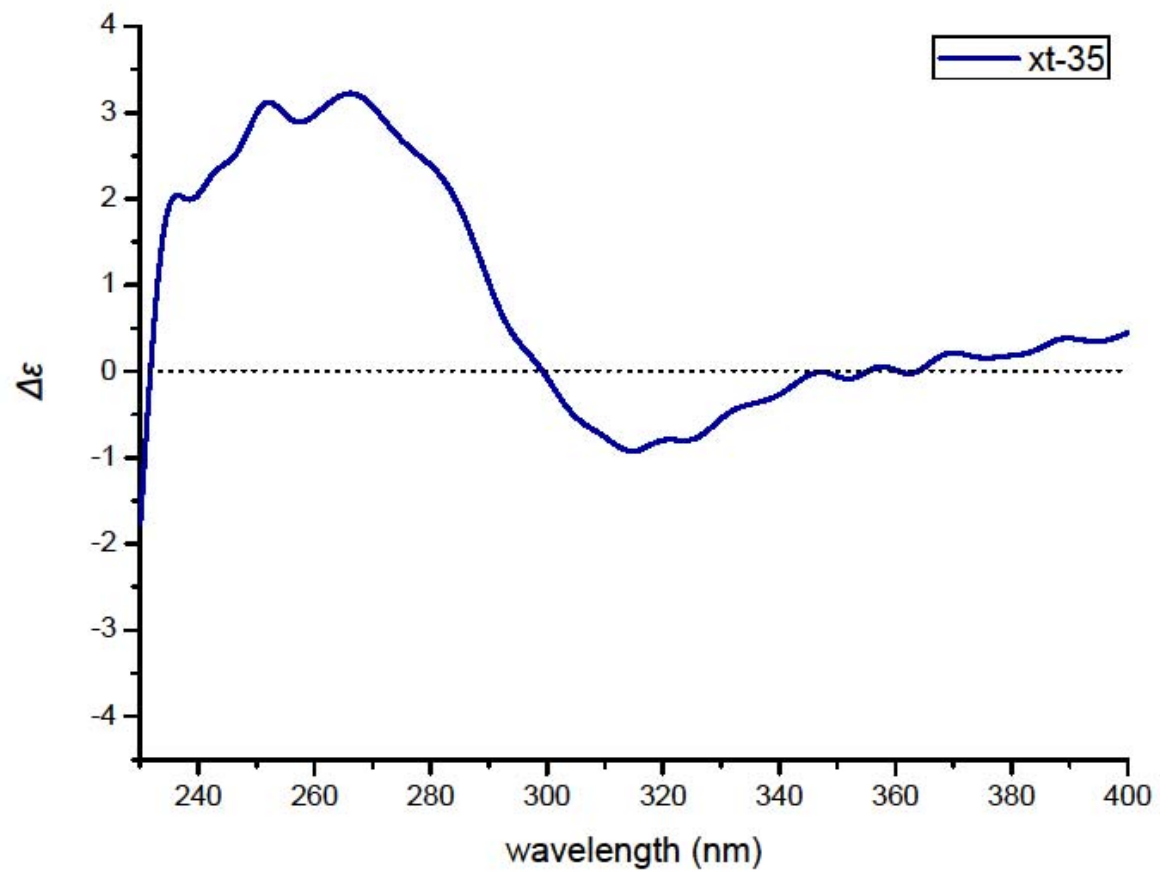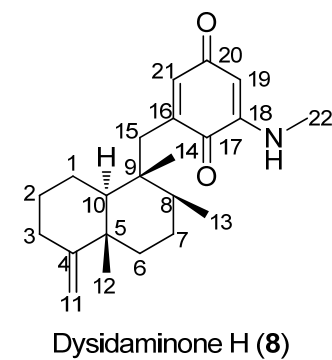

**Figure S80.** CD Spectrum of Dysidaminone H (8) in MeOH.

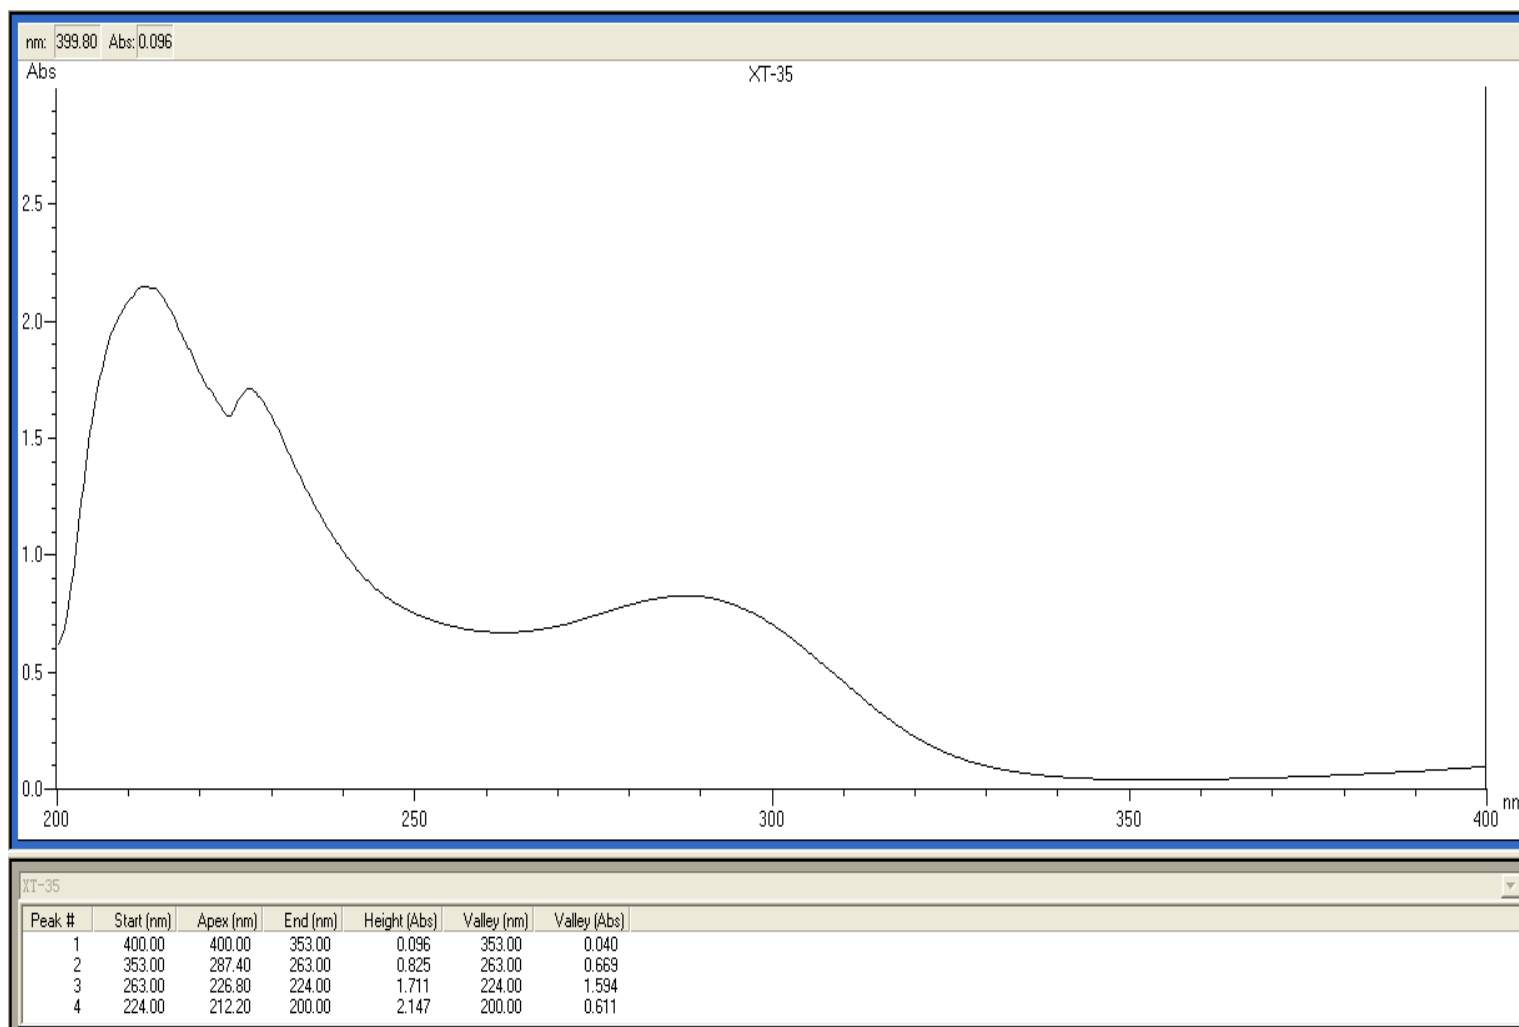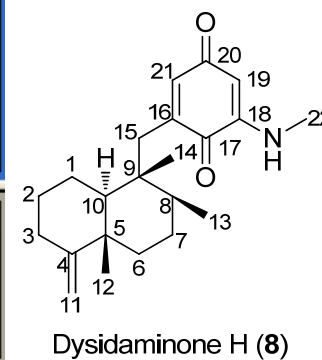

**Figure S81.** UV Spectrum of Dysidaminone H (**8**) in MeOH.

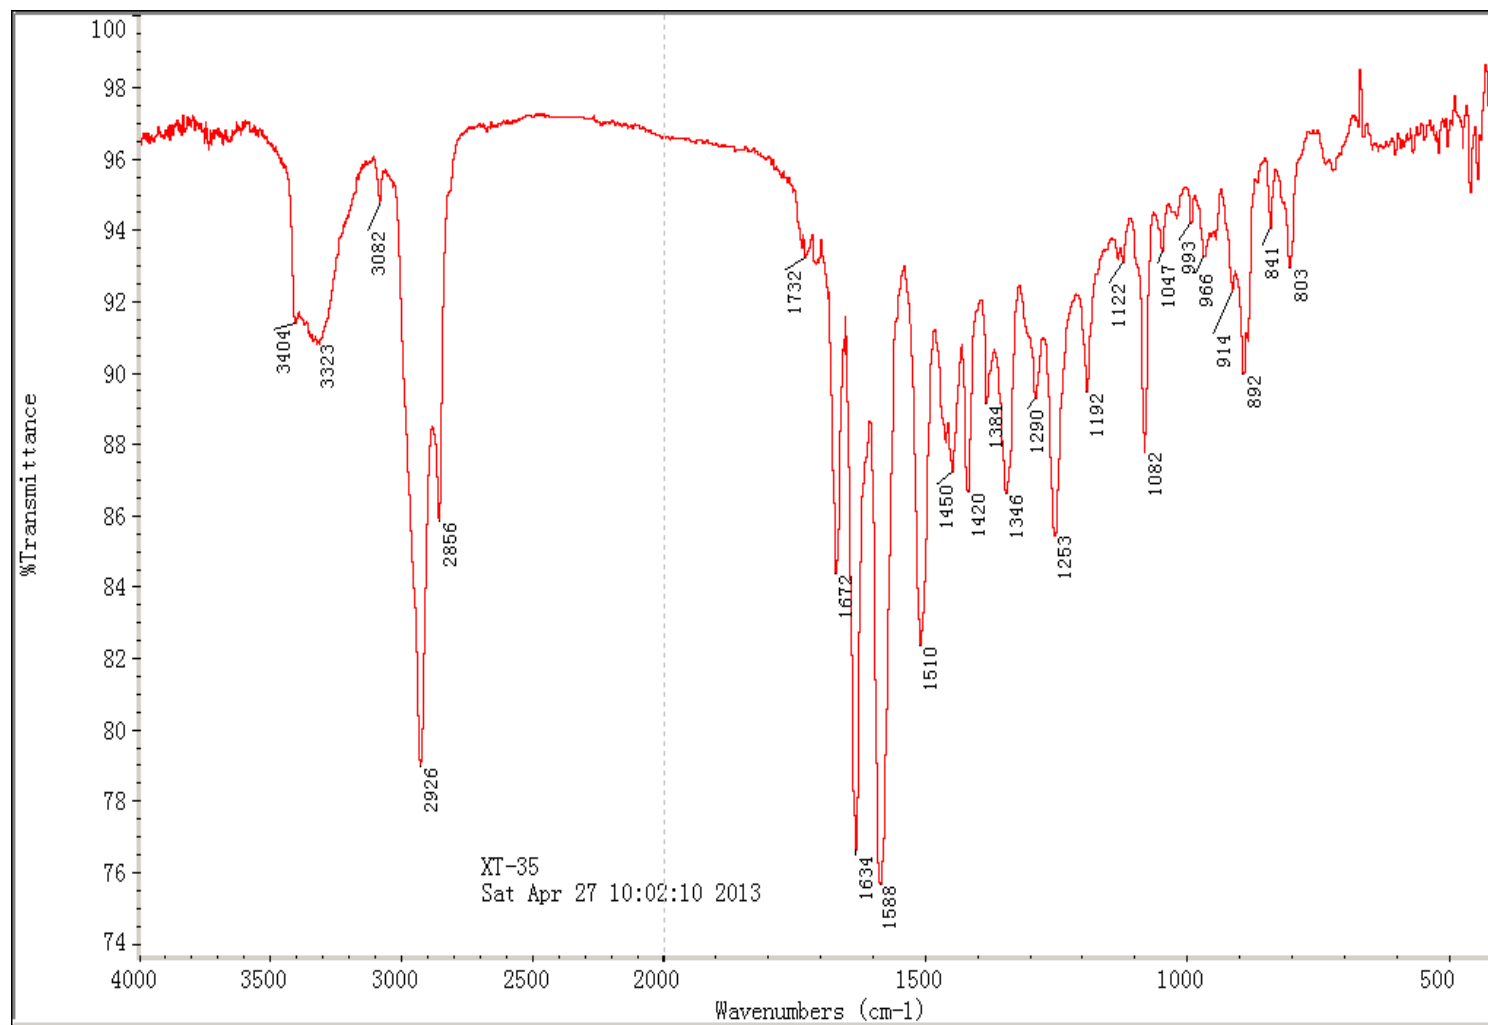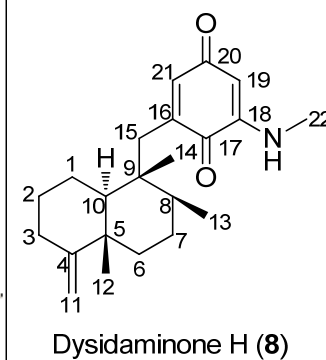

**Figure S82.** IR Spectrum of Dysidaminone H (8).



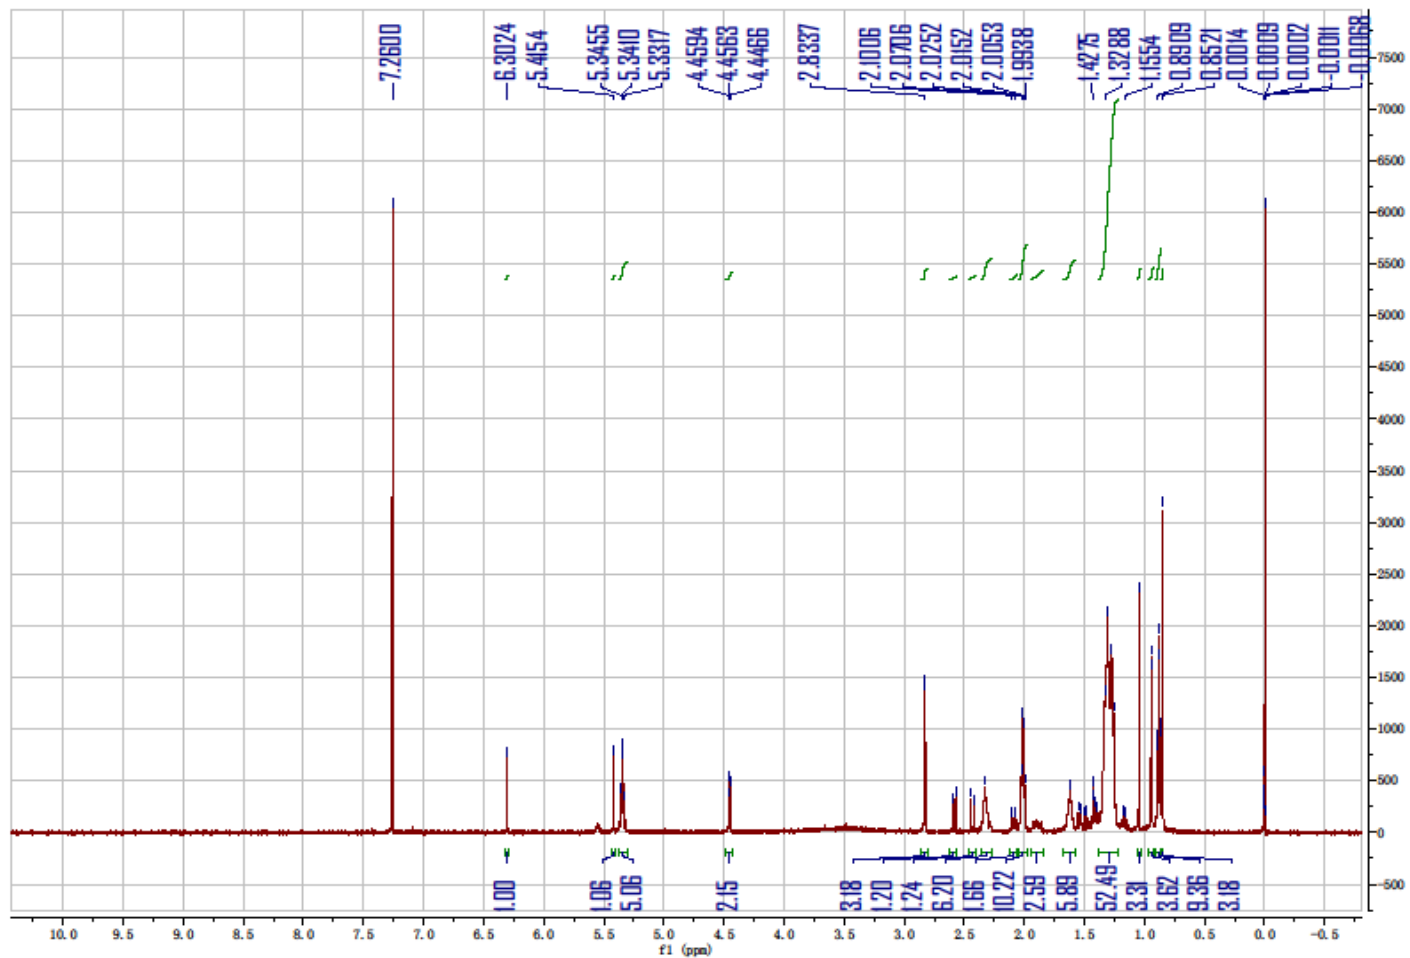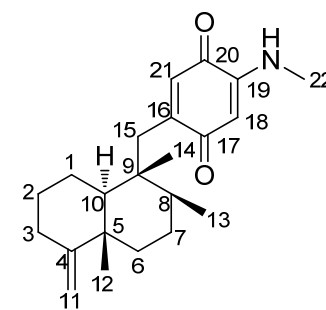

Dysidaminone I (9)

Figure S83.  $^1\text{H}$  NMR Spectrum of Dysidaminone I (9) in  $\text{CDCl}_3$ .

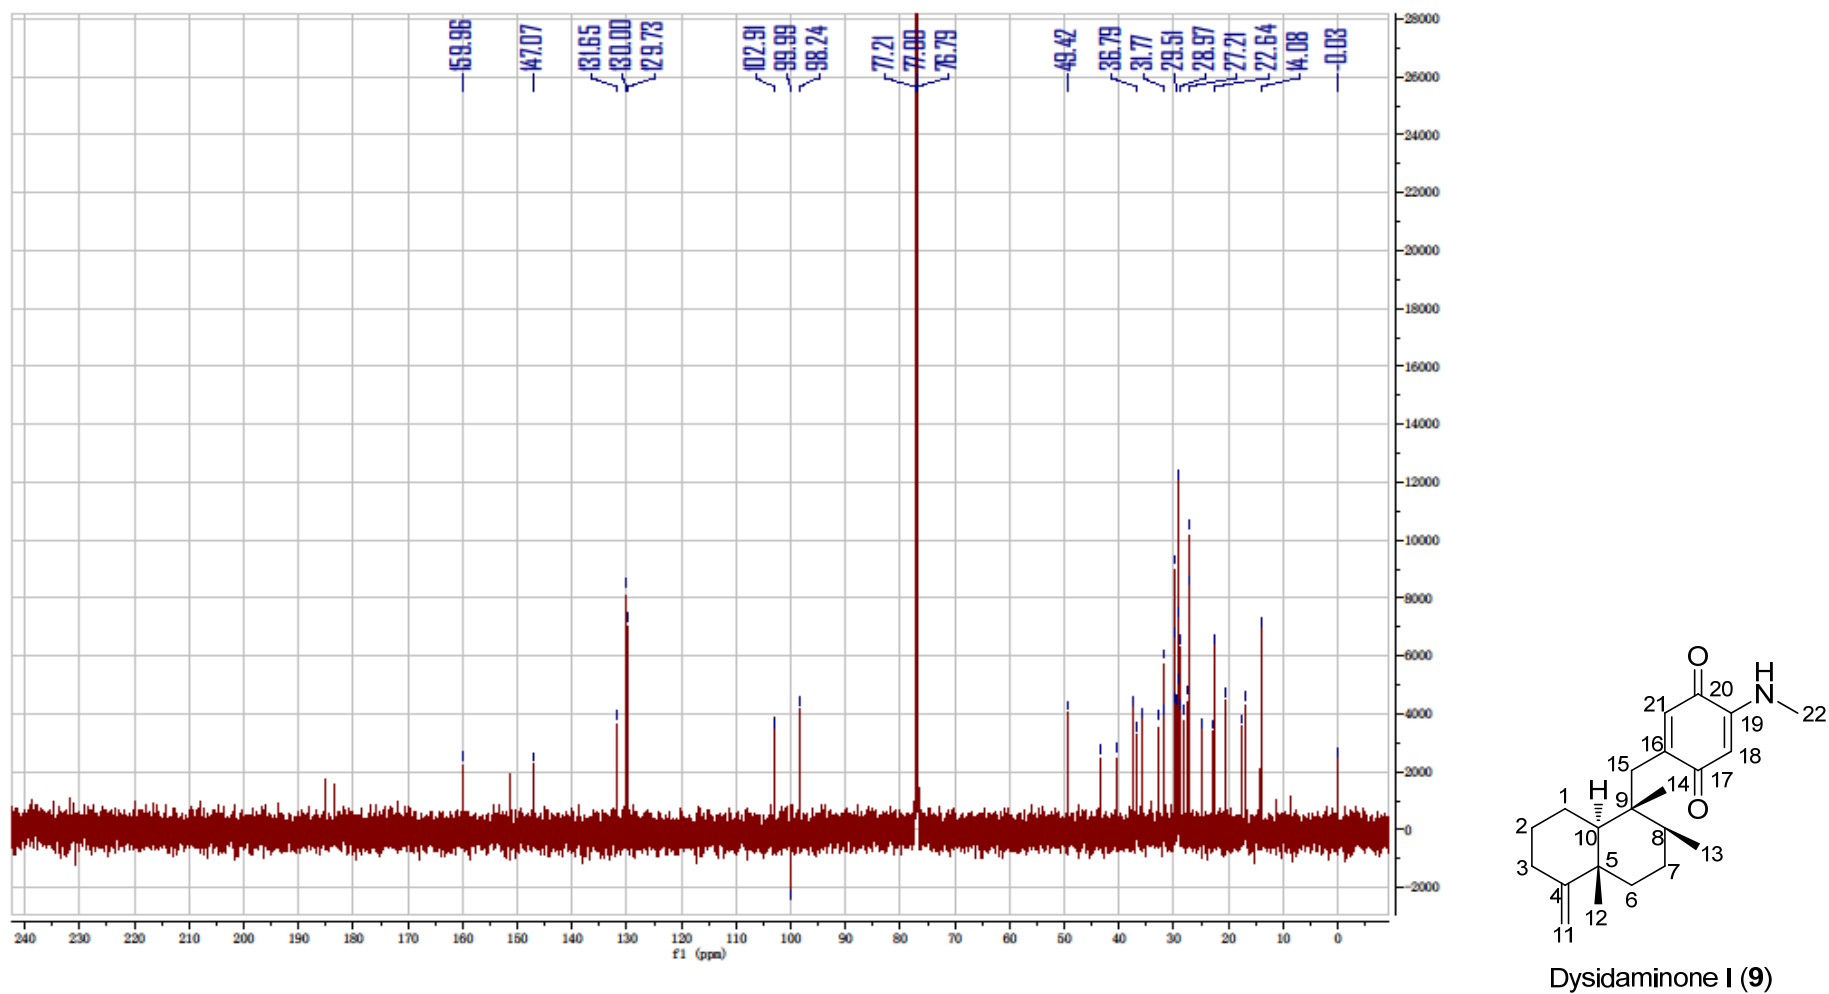

**Figure S84.** <sup>13</sup>C NMR Spectrum of Dysidaminone I (9) in CDCl<sub>3</sub>.

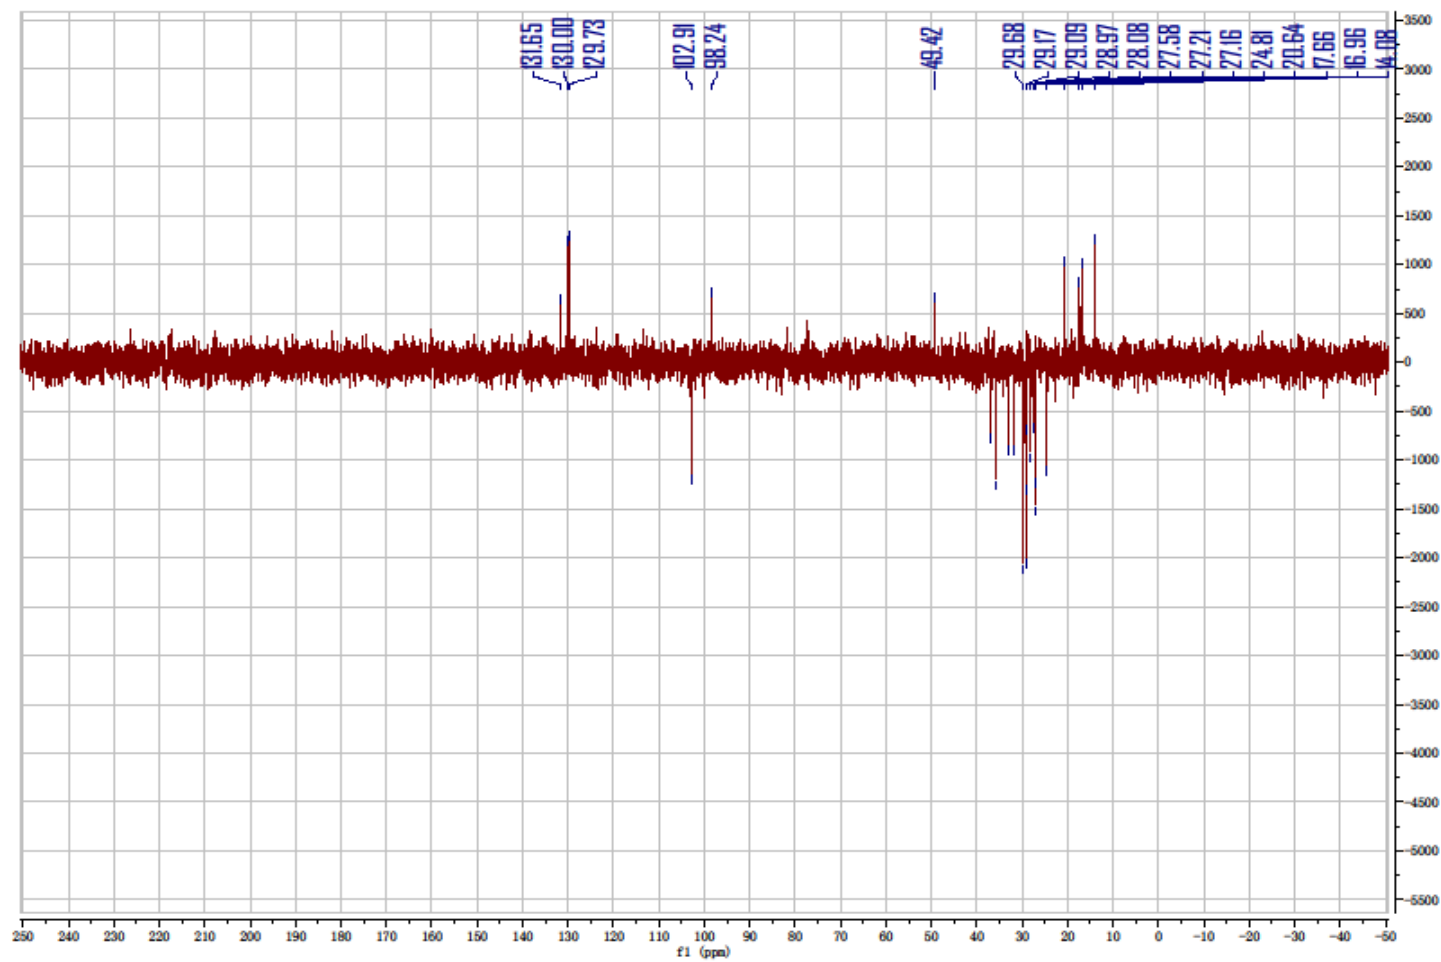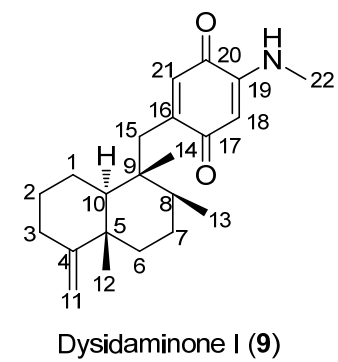

Figure S85. DEPT135 Spectrum of Dysidaminone I (9) in CDCl<sub>3</sub>.

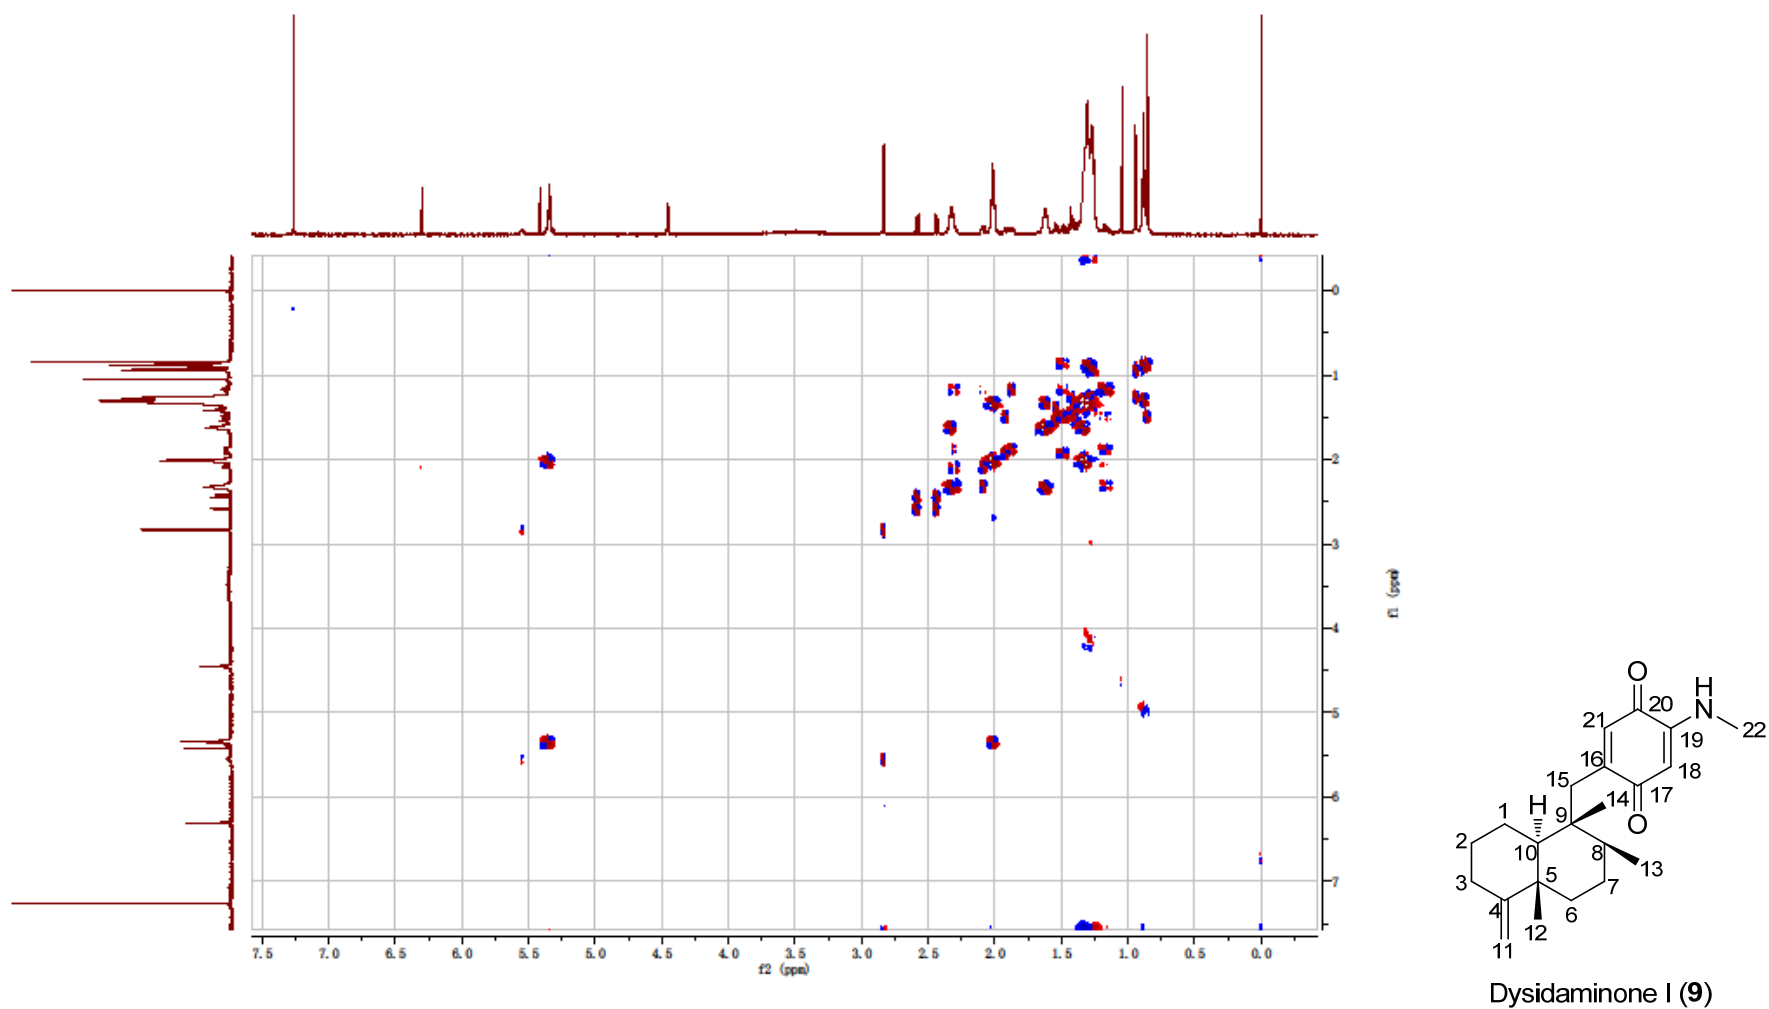

**Figure S86.**  $^1\text{H}$ - $^1\text{H}$  COSY Spectrum of Dysidaminone I (9) in  $\text{CDCl}_3$ .

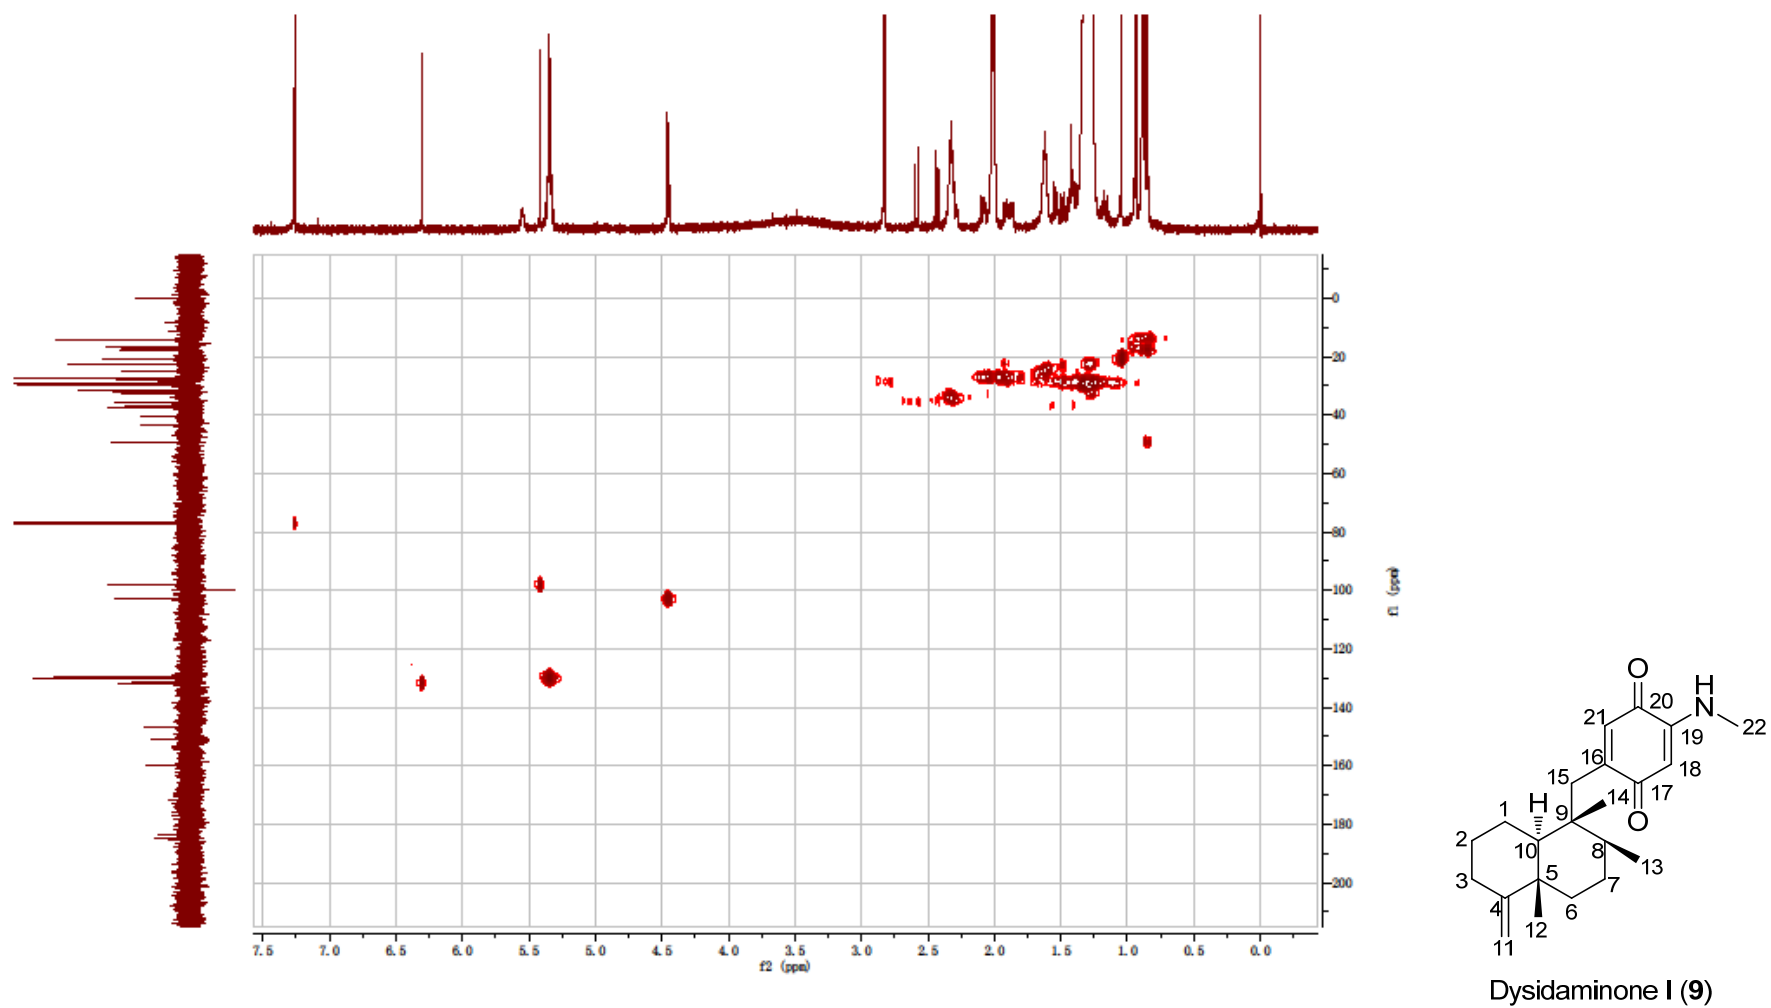

**Figure S87.** HSQC Spectrum of Dysidaminone I (**9**) in CDCl<sub>3</sub>.

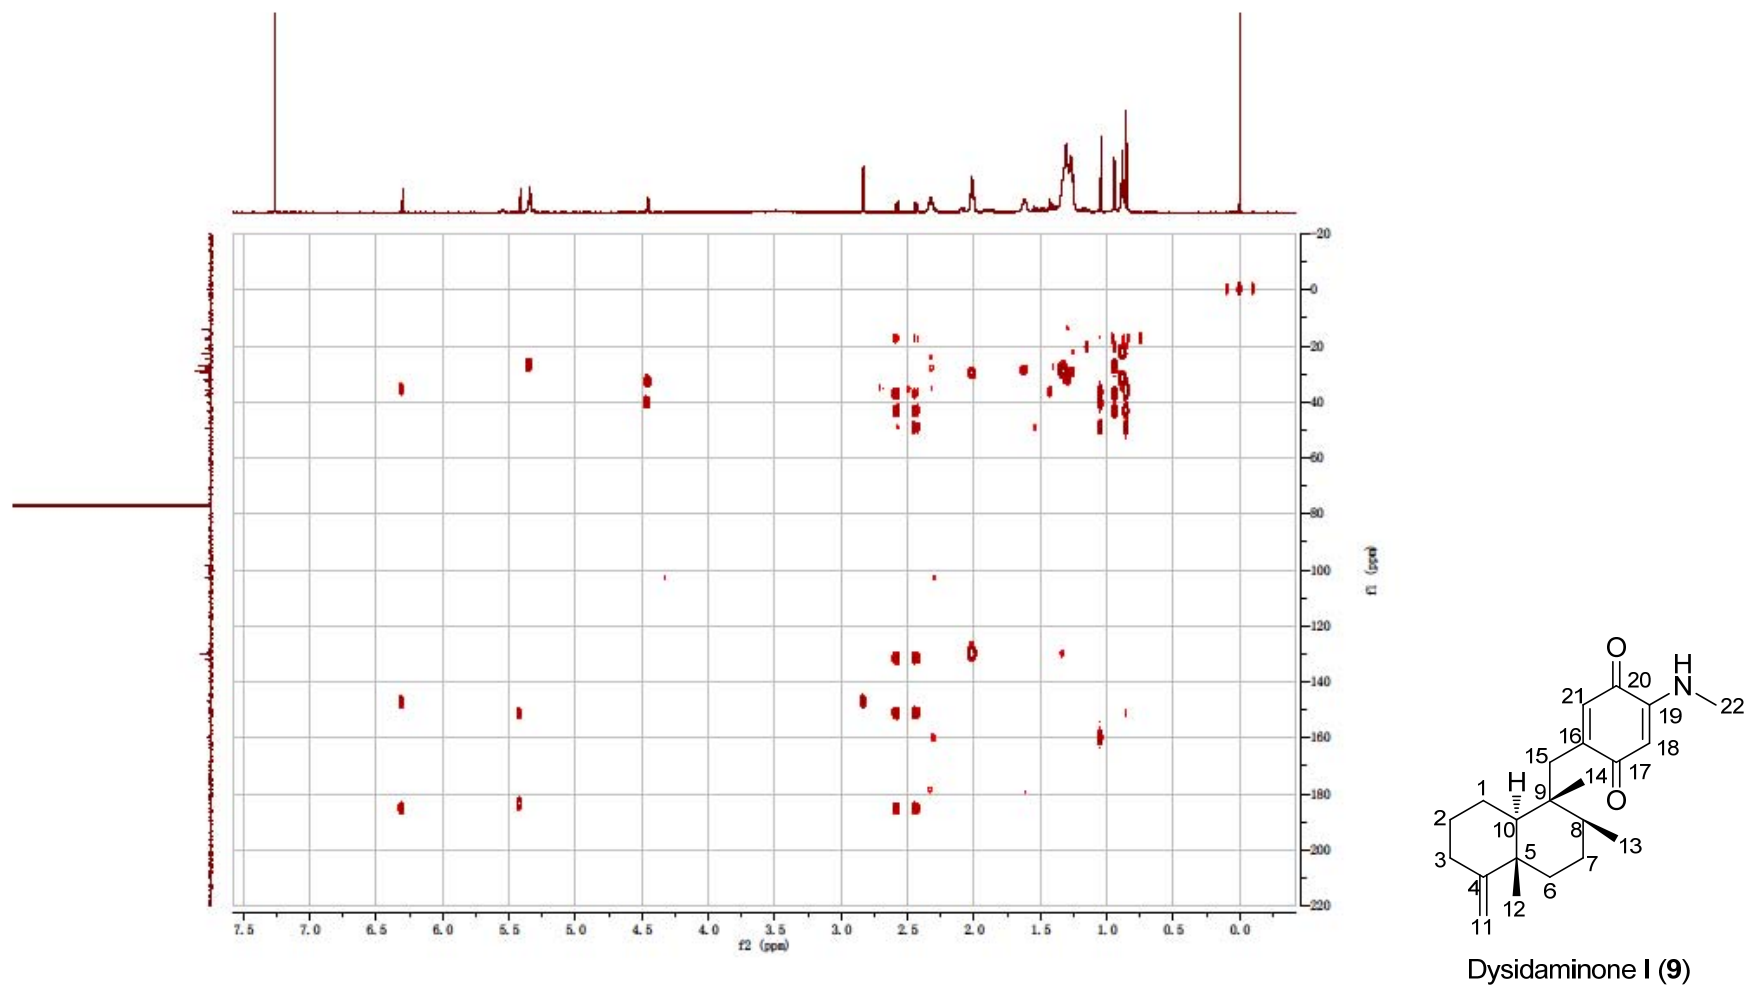

**Figure S88.** HMBC Spectrum of Dysidaminone I (**9**) in CDCl<sub>3</sub>.

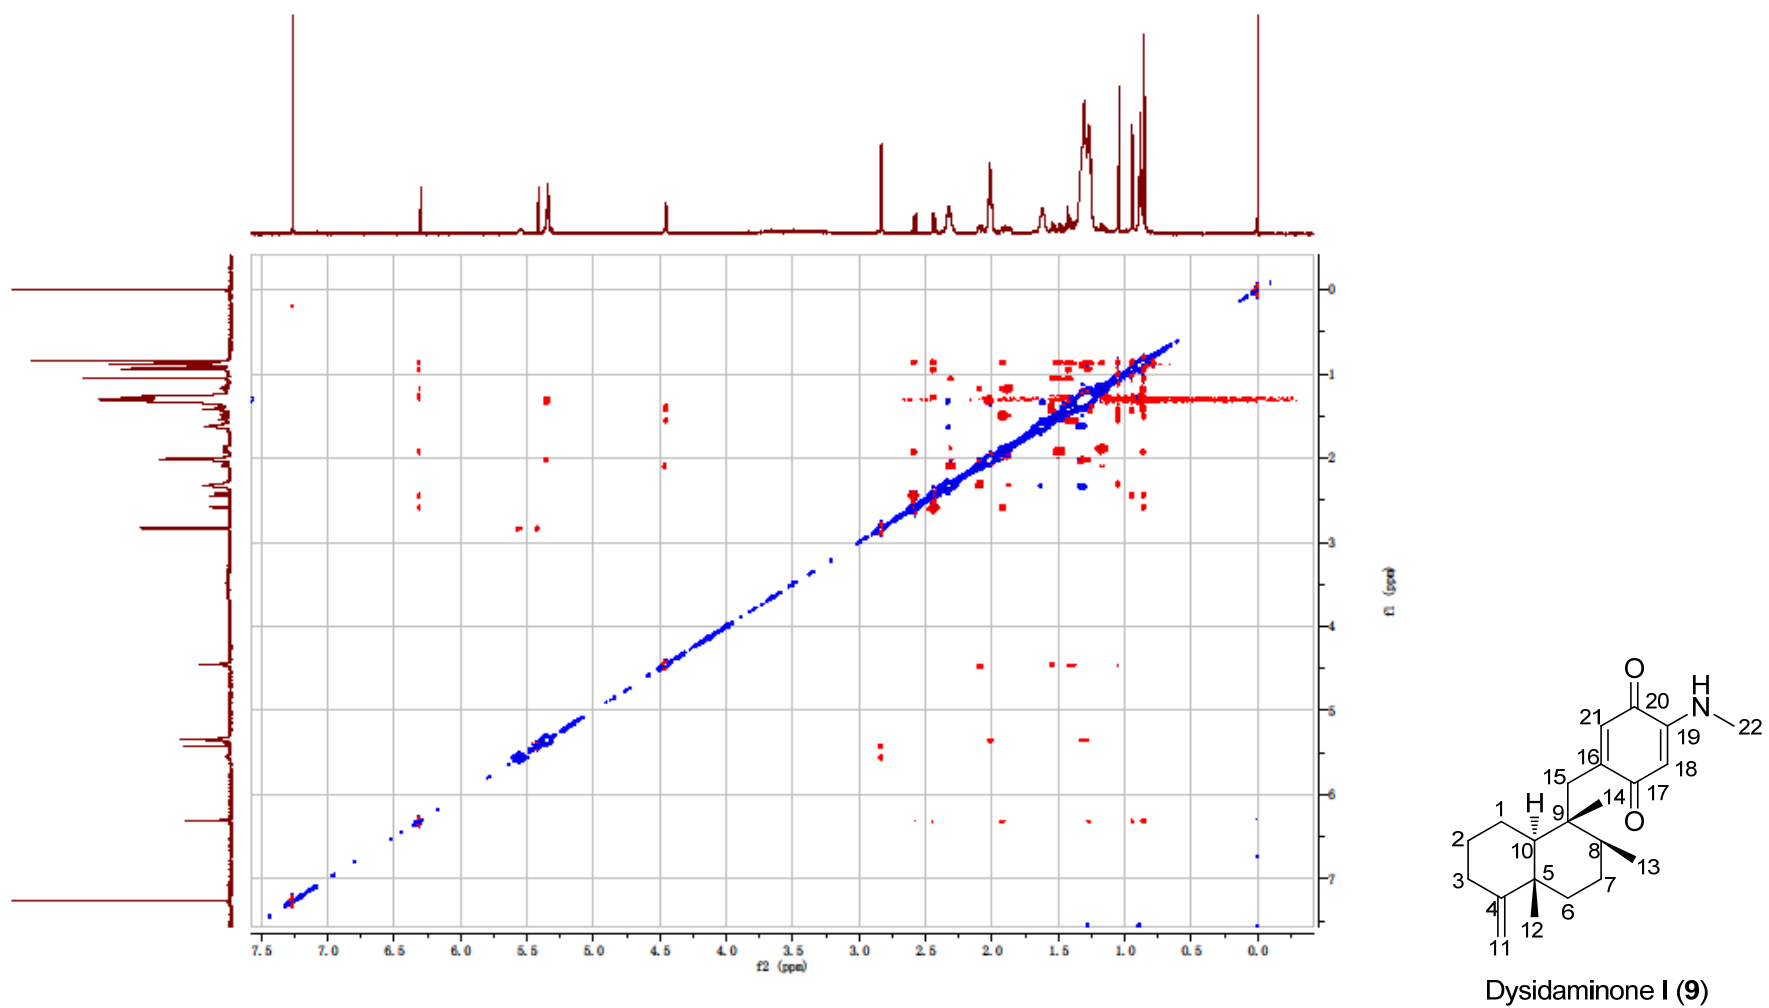

**Figure S89.** NOESY Spectrum of Dysidaminone I (9) in CDCl<sub>3</sub>.

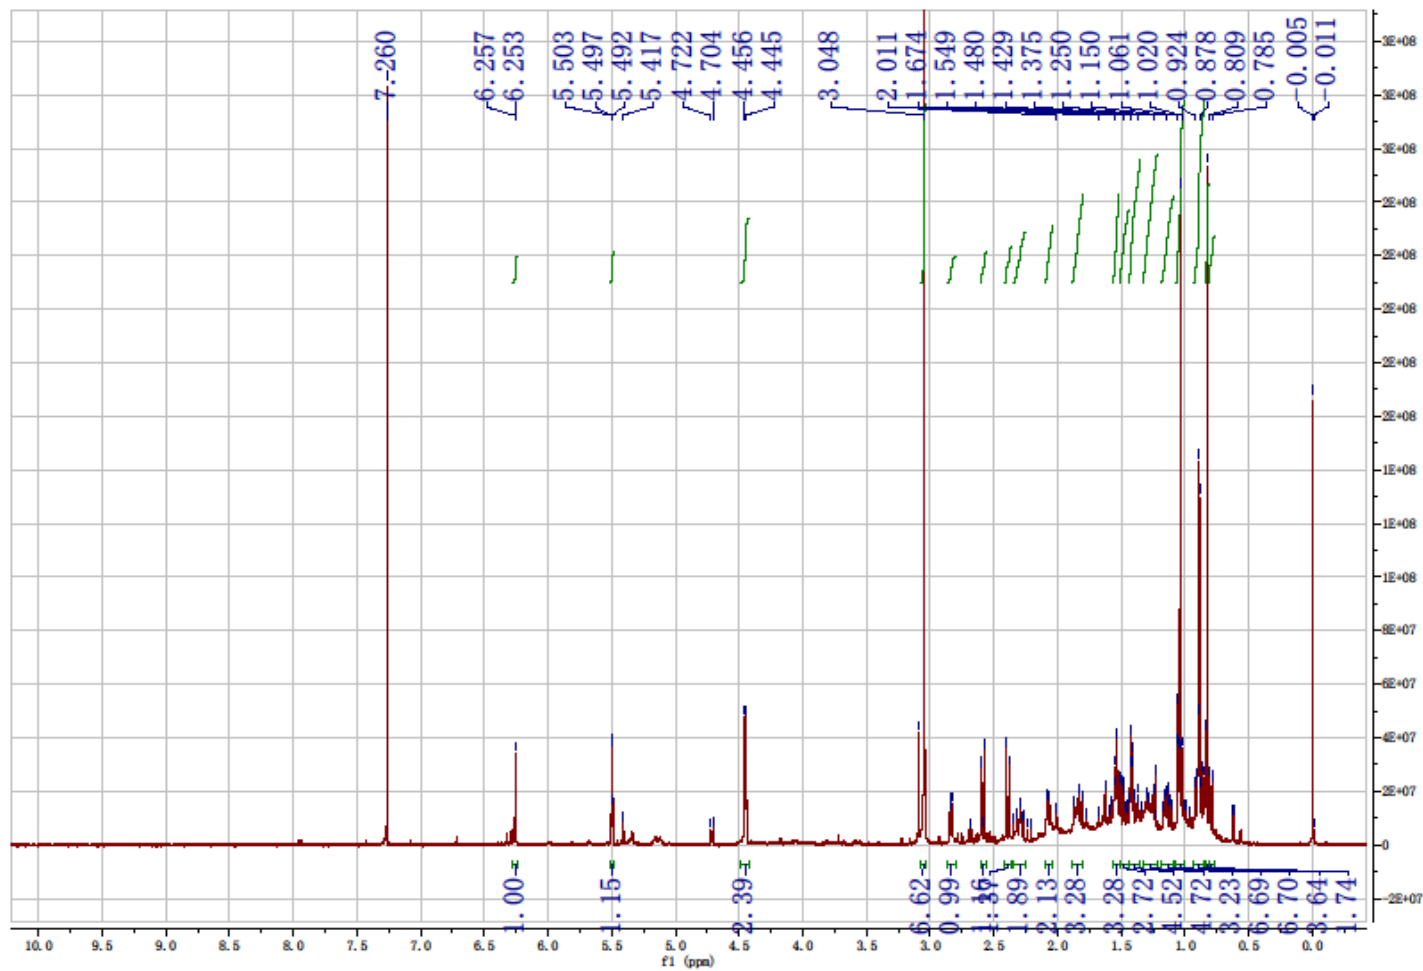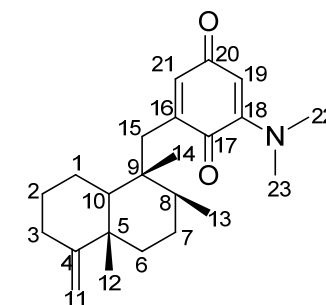

Dysidaminone J (**10**)

**Figure S90.**  $^1\text{H}$  NMR Spectrum of Dysidaminone J (**10**) in  $\text{CDCl}_3$ .



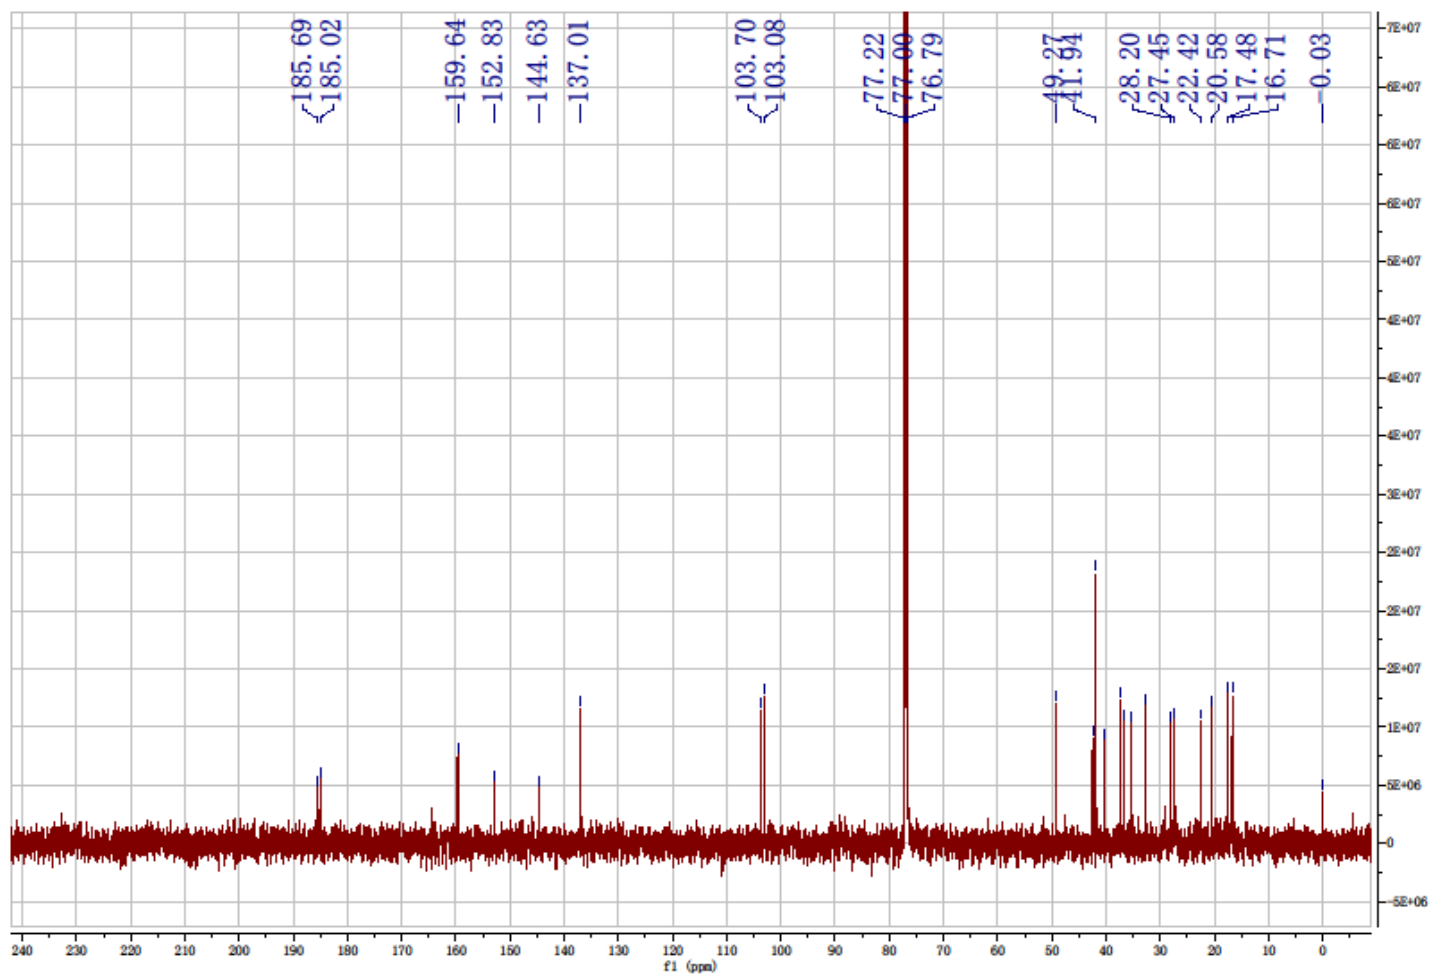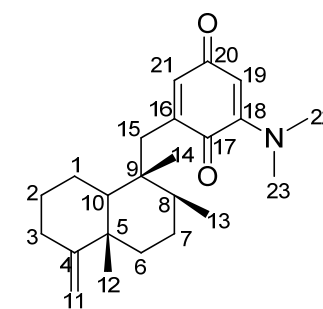

Dysidaminone J (**10**)

**Figure S91.**  $^{13}\text{C}$  NMR Spectrum of Dysidaminone J (**10**) in  $\text{CDCl}_3$ .

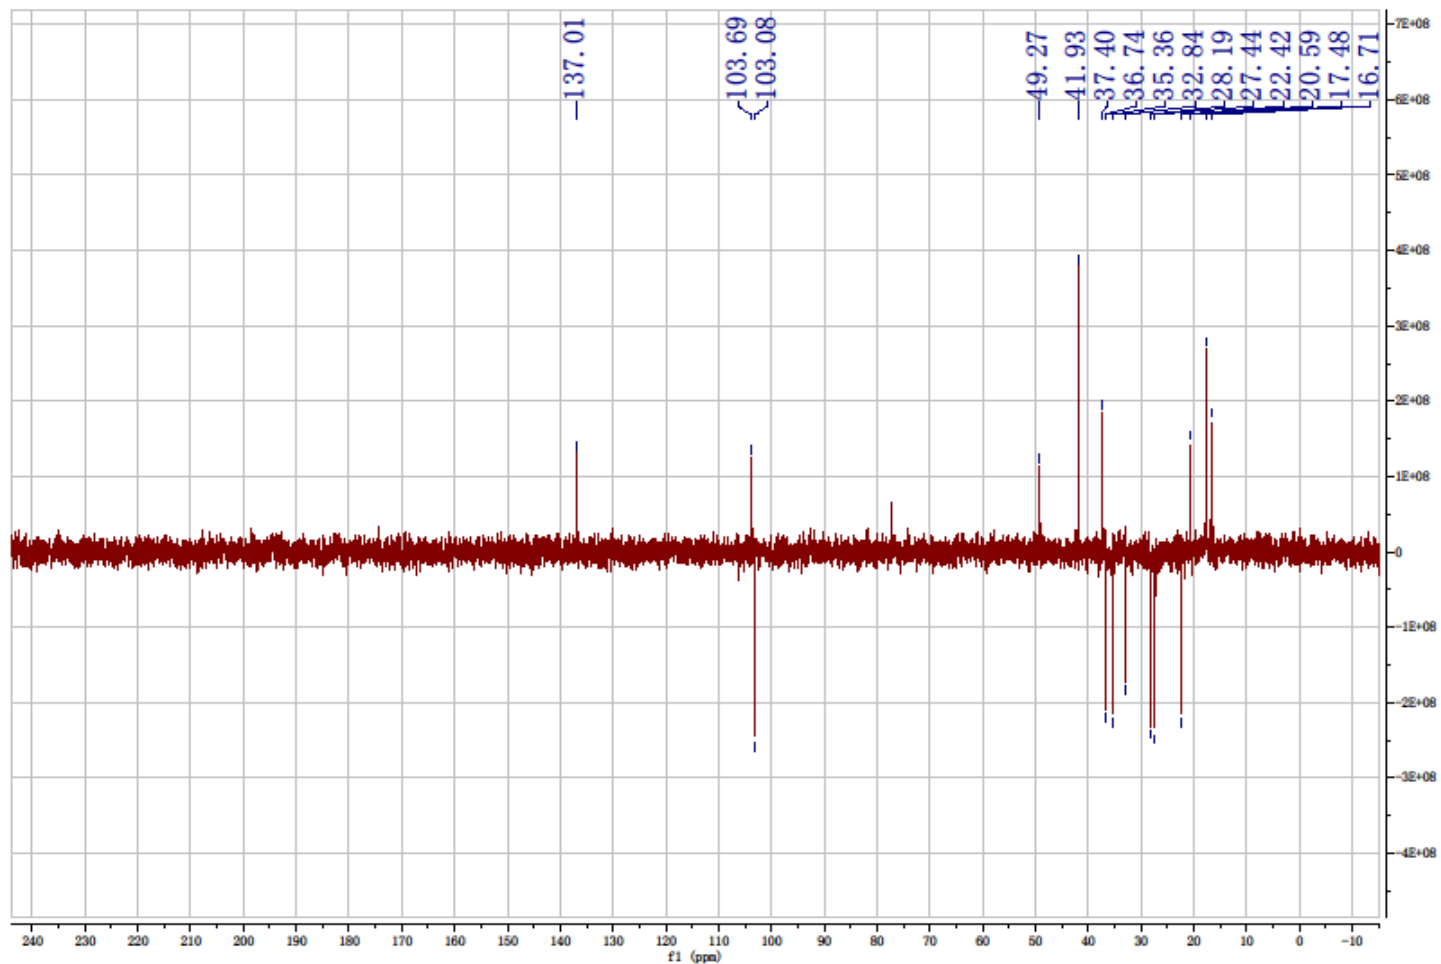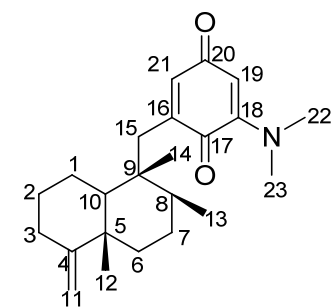

Dysidaminone J (**10**)

**Figure S92.**  $^1\text{H}$ - $^1\text{H}$  COSY Spectrum of Dysidaminone J (**10**) in  $\text{CDCl}_3$ .

## Elemental Composition Report

Page 1

Tolerance = 10.0 PPM / DBE: min = -1.5, max = 50.0  
Selected filters: None

Monoisotopic Mass, Even Electron Ions  
23 formula(e) evaluated with 1 results within limits (up to 50 closest results for each mass)

Elements Used:

C: 10-24 H: 10-40 N: 1-3 O: 1-3

SIPI

XT-37A M.W=341

WQ13-088H 30 (1.037) AM (Cen,4, 80.00, Ar,5000.0,354.09,0.70); Sm (SG, 2x3.00); Cm (21:30)

Q-ToF micro  
YA019  
342.2434

22-Apr-2013,13:09:19

TOF MS ES+  
3.16e4

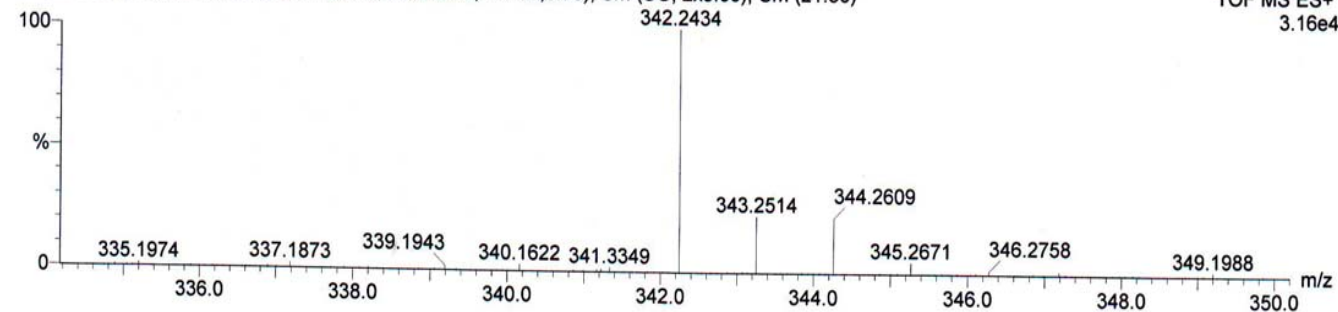

| Minimum: | 60.00  |            |     |      |      |        |              |  |  |
|----------|--------|------------|-----|------|------|--------|--------------|--|--|
| Maximum: | 100.00 |            | 5.0 | 10.0 | -1.5 |        |              |  |  |
| Mass     | RA     | Calc. Mass | mDa | PPM  | DBE  | i-FIT  | Formula      |  |  |
| 342.2434 | 100.00 | 342.2433   | 0.1 | 0.3  | 7.5  | 2575.7 | C22 H32 N O2 |  |  |

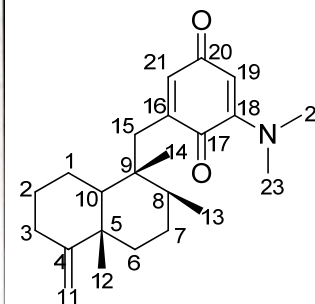

Dysidaminone J (10)

Figure S93. HRESIMS of Dysidaminone J (10).

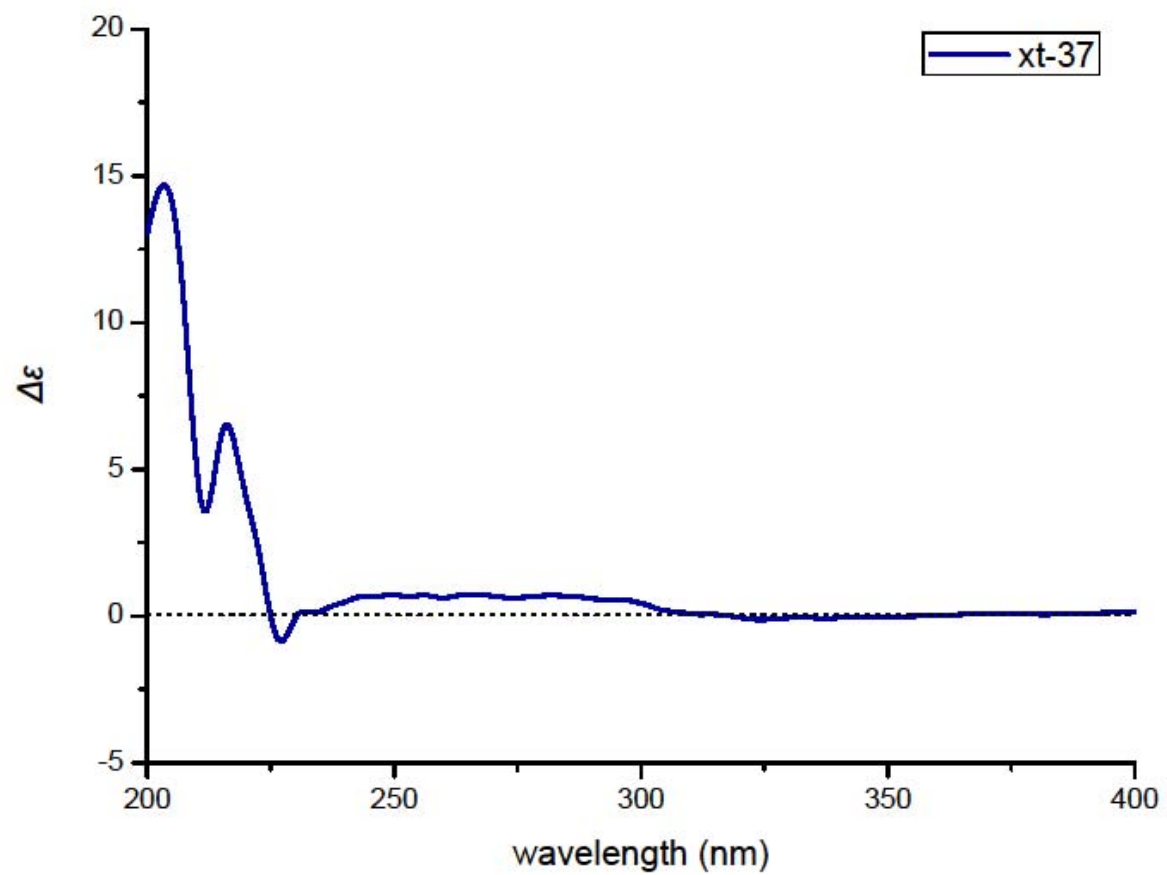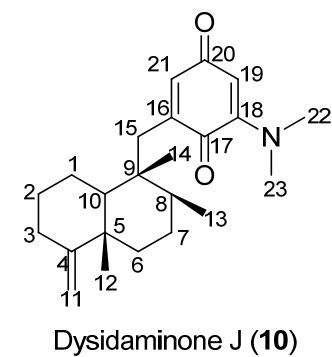

**Figure S94.** CD Spectrum of Dysidaminone J (**10**) in MeOH.

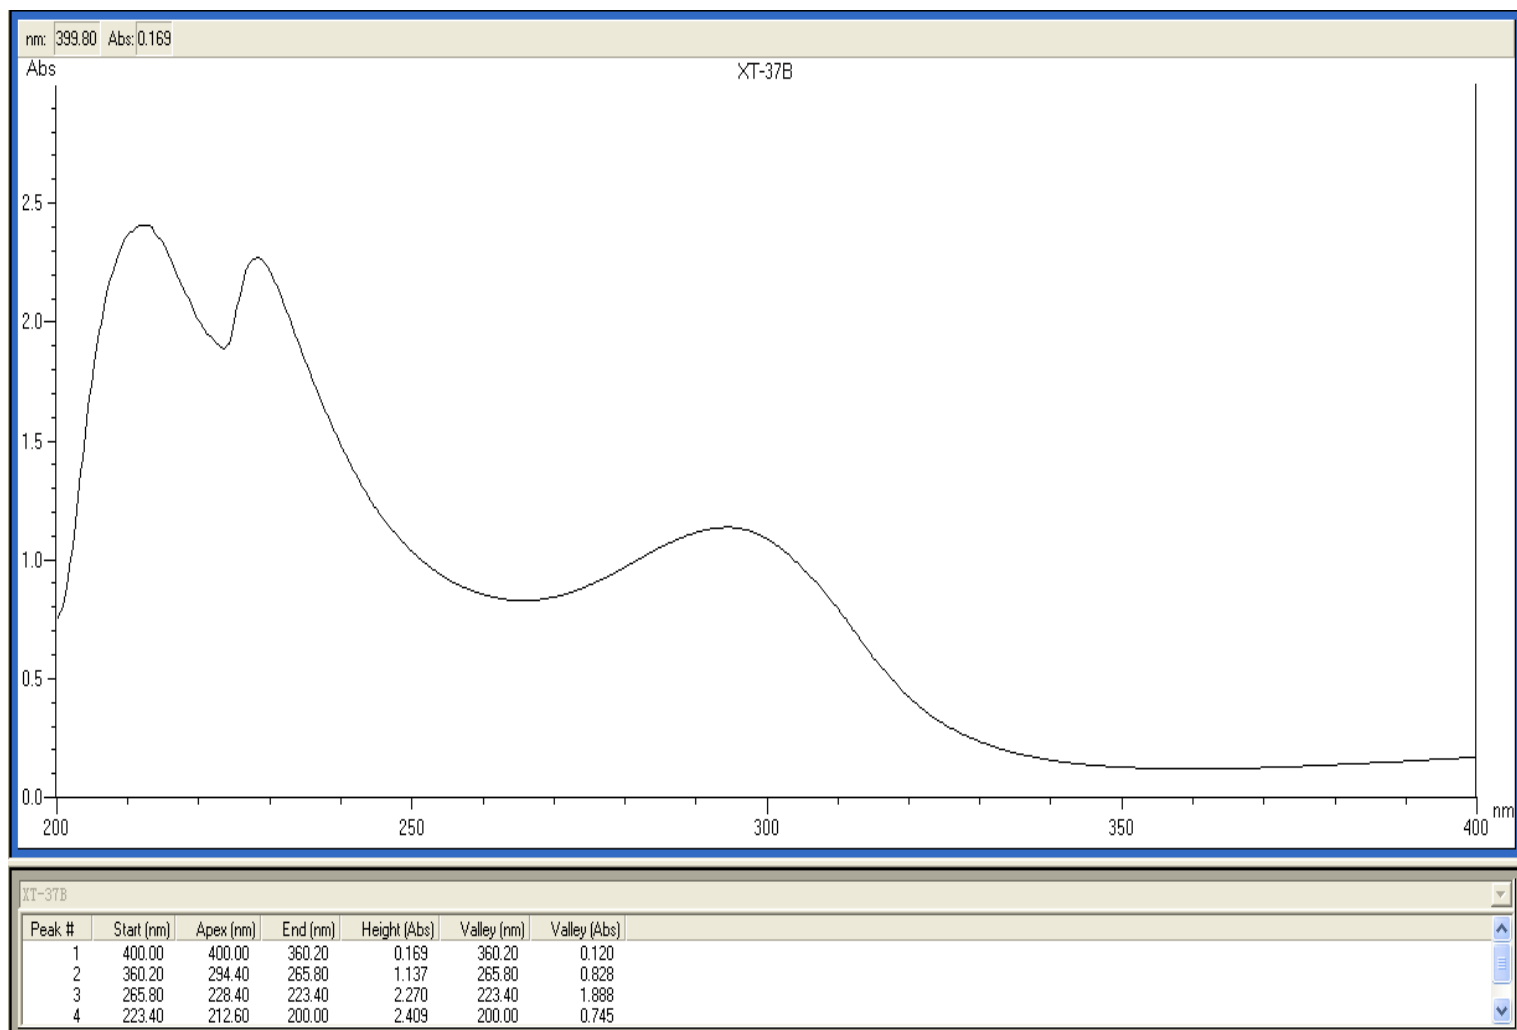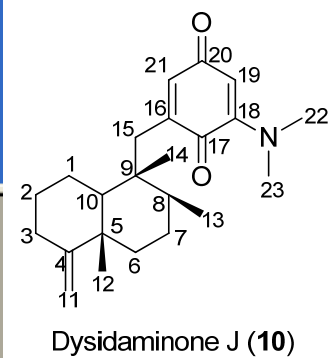

**Figure S95.** UV Spectrum of Dysidaminone J (**10**) in MeOH.

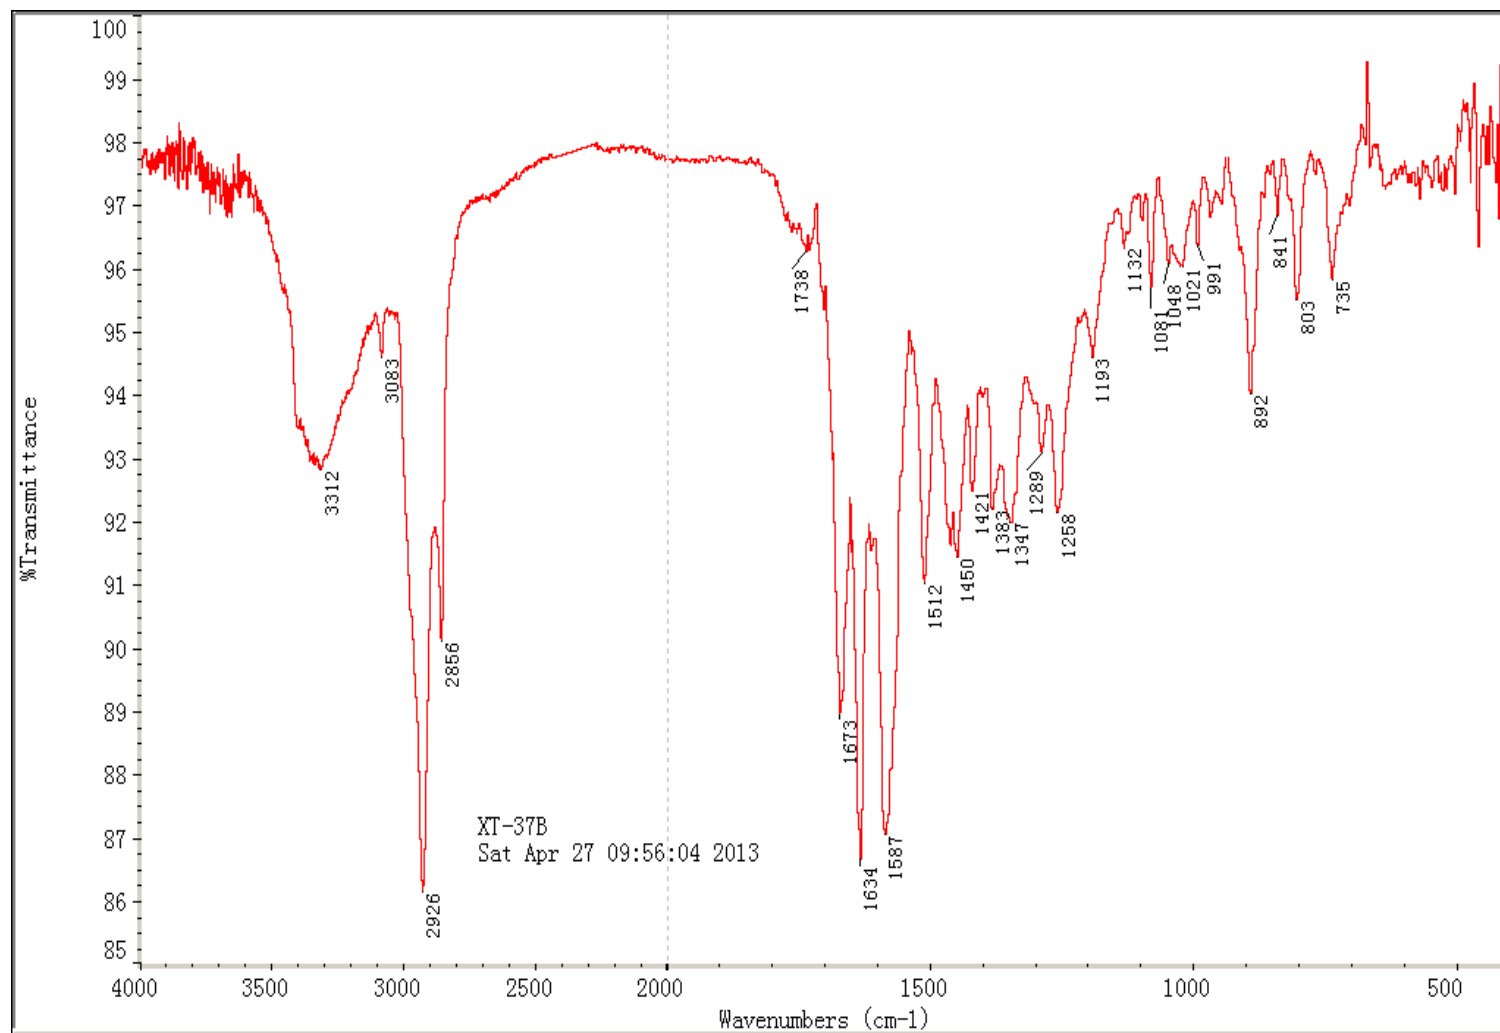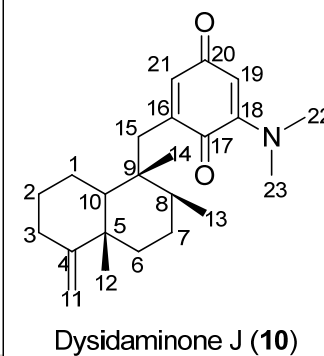

**Figure S96.** IR Spectrum of Dysidaminone J (**10**).

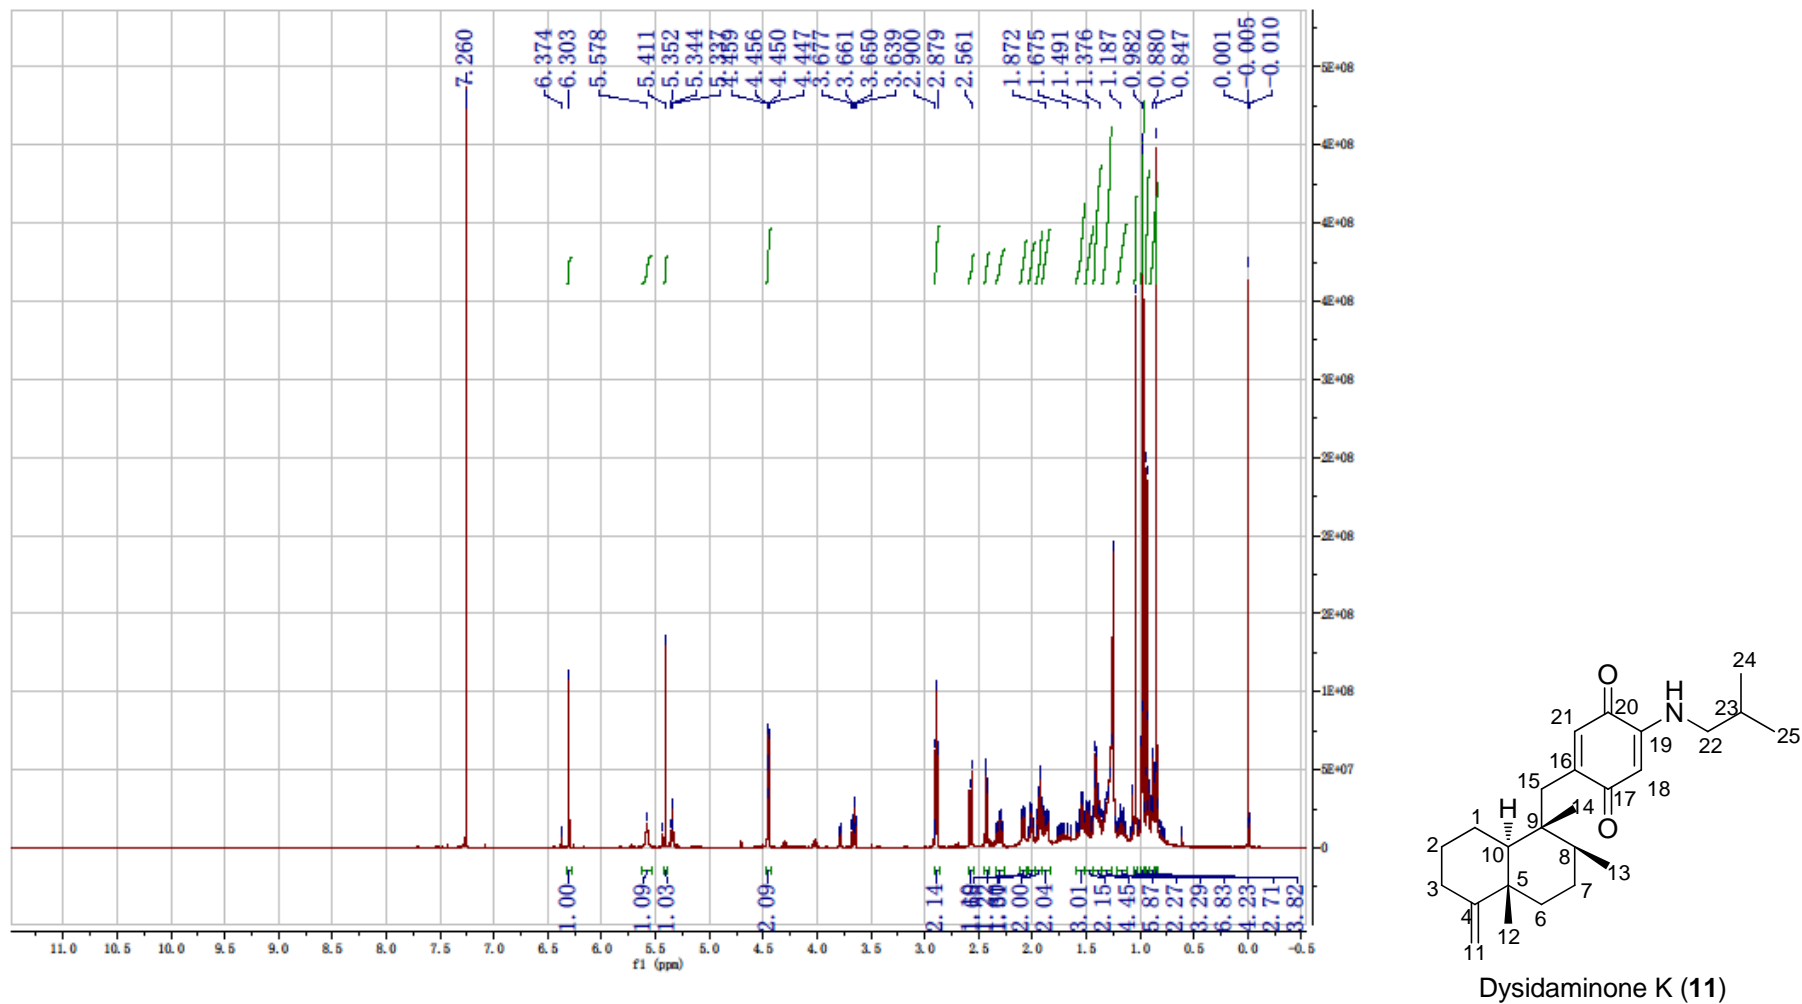

**Figure S97.** <sup>1</sup>H NMR Spectrum of Dysidaminone K (**11**) in CDCl<sub>3</sub>.

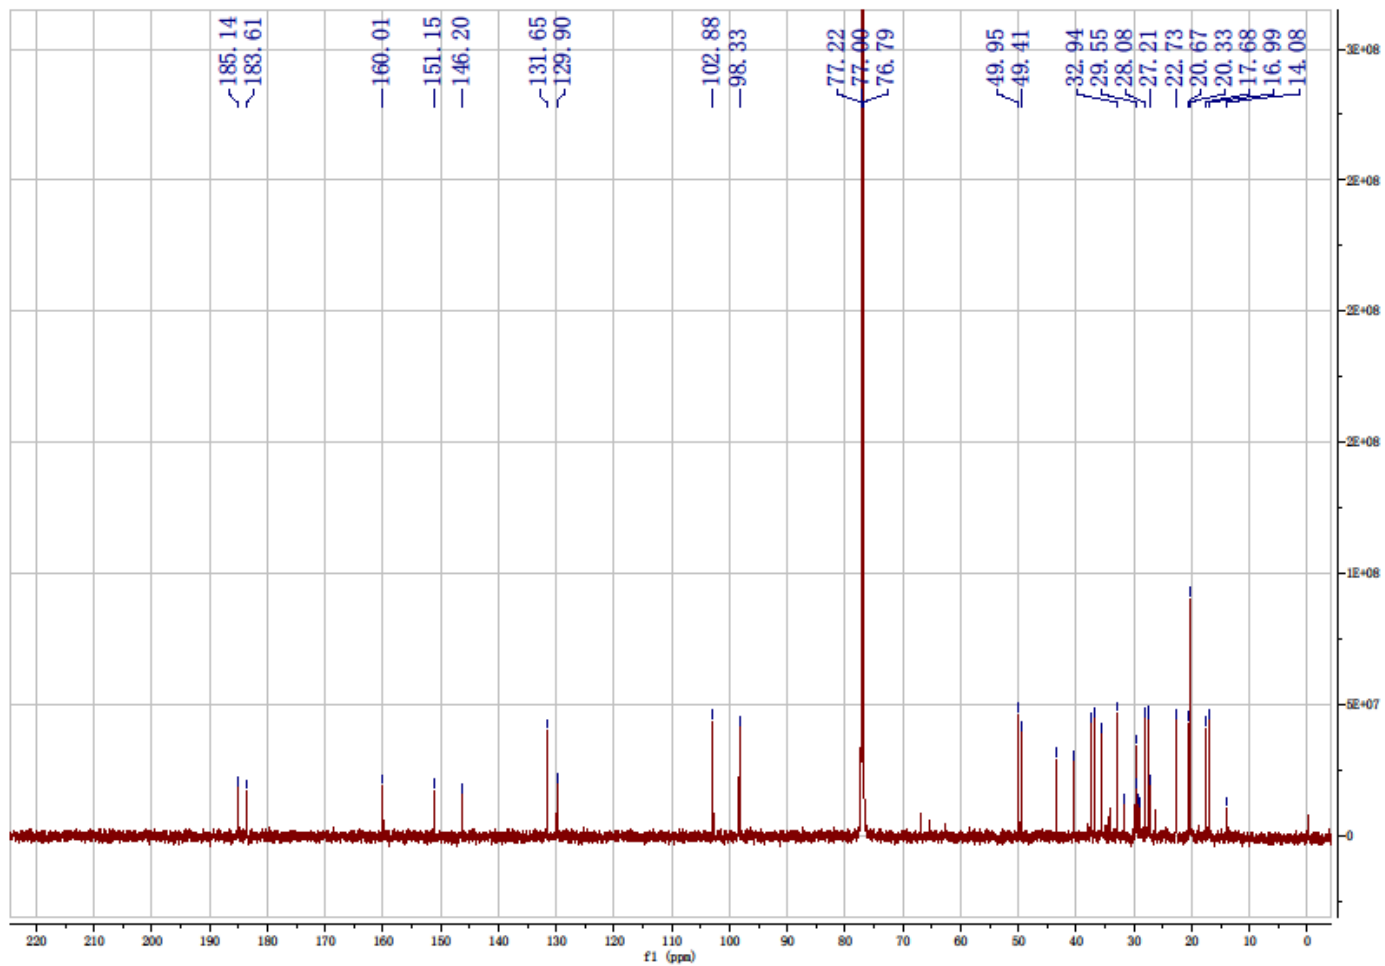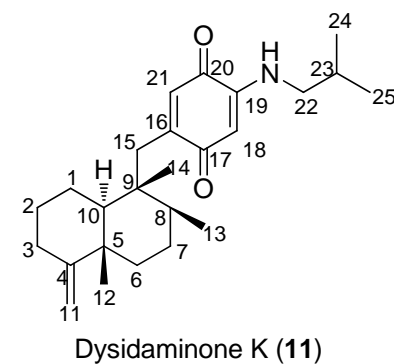

**Figure S98.**  $^{13}\text{C}$  NMR Spectrum of Dysidaminone K (11) in  $\text{CDCl}_3$ .



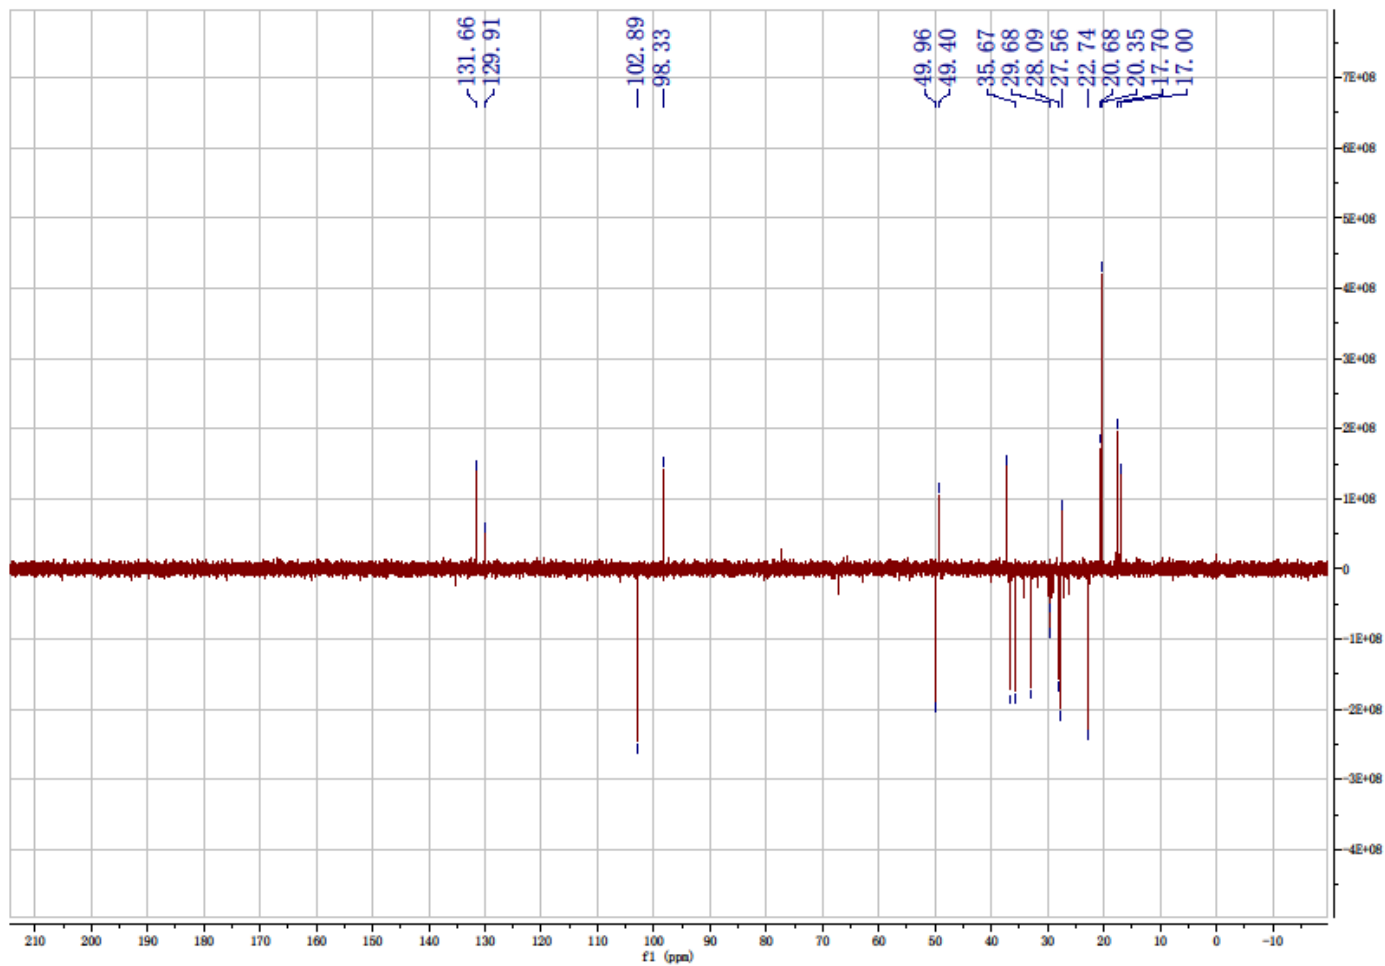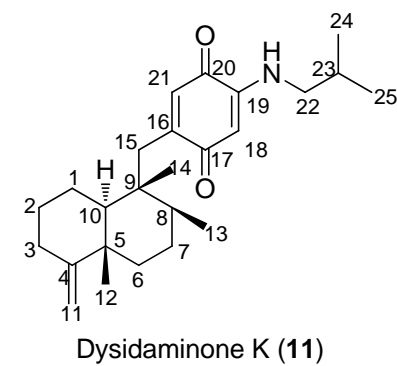

**Figure S99.** DEPT135 Spectrum of Dysidaminone K (**11**) in CDCl<sub>3</sub>.

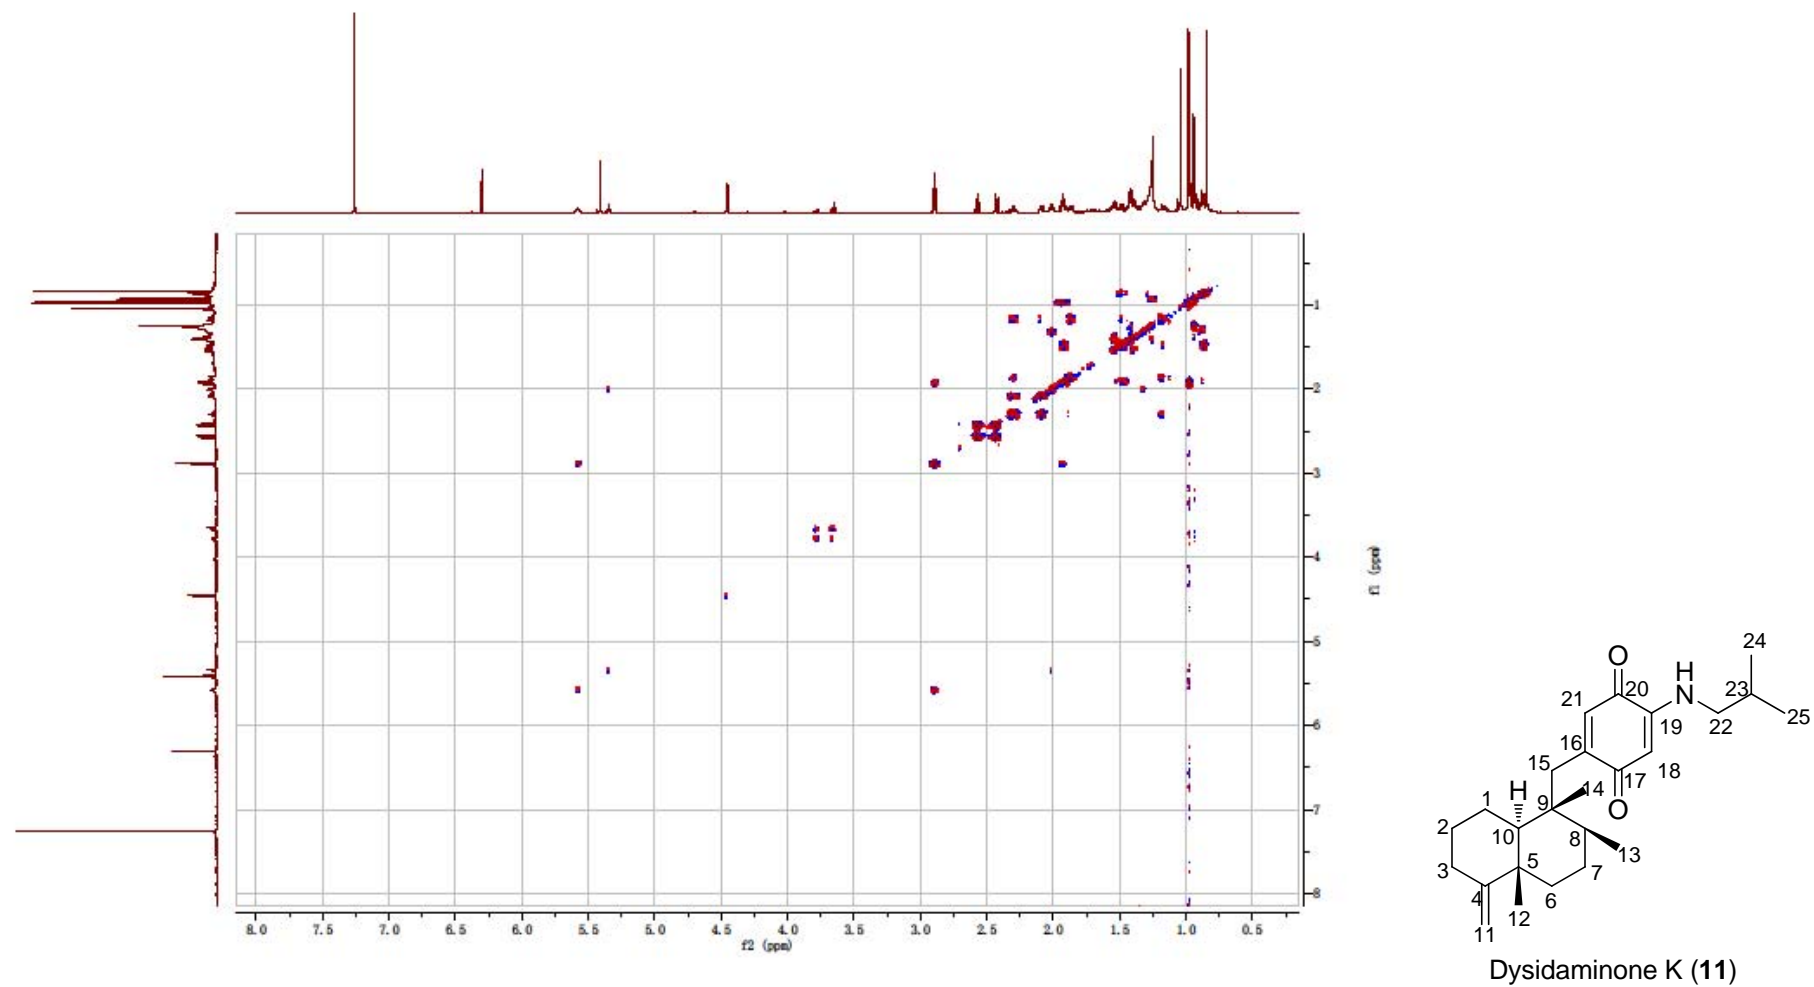

**Figure S100.**  $^1\text{H}$ - $^1\text{H}$  COSY Spectrum of Dysidaminone K (11) in  $\text{CDCl}_3$ .

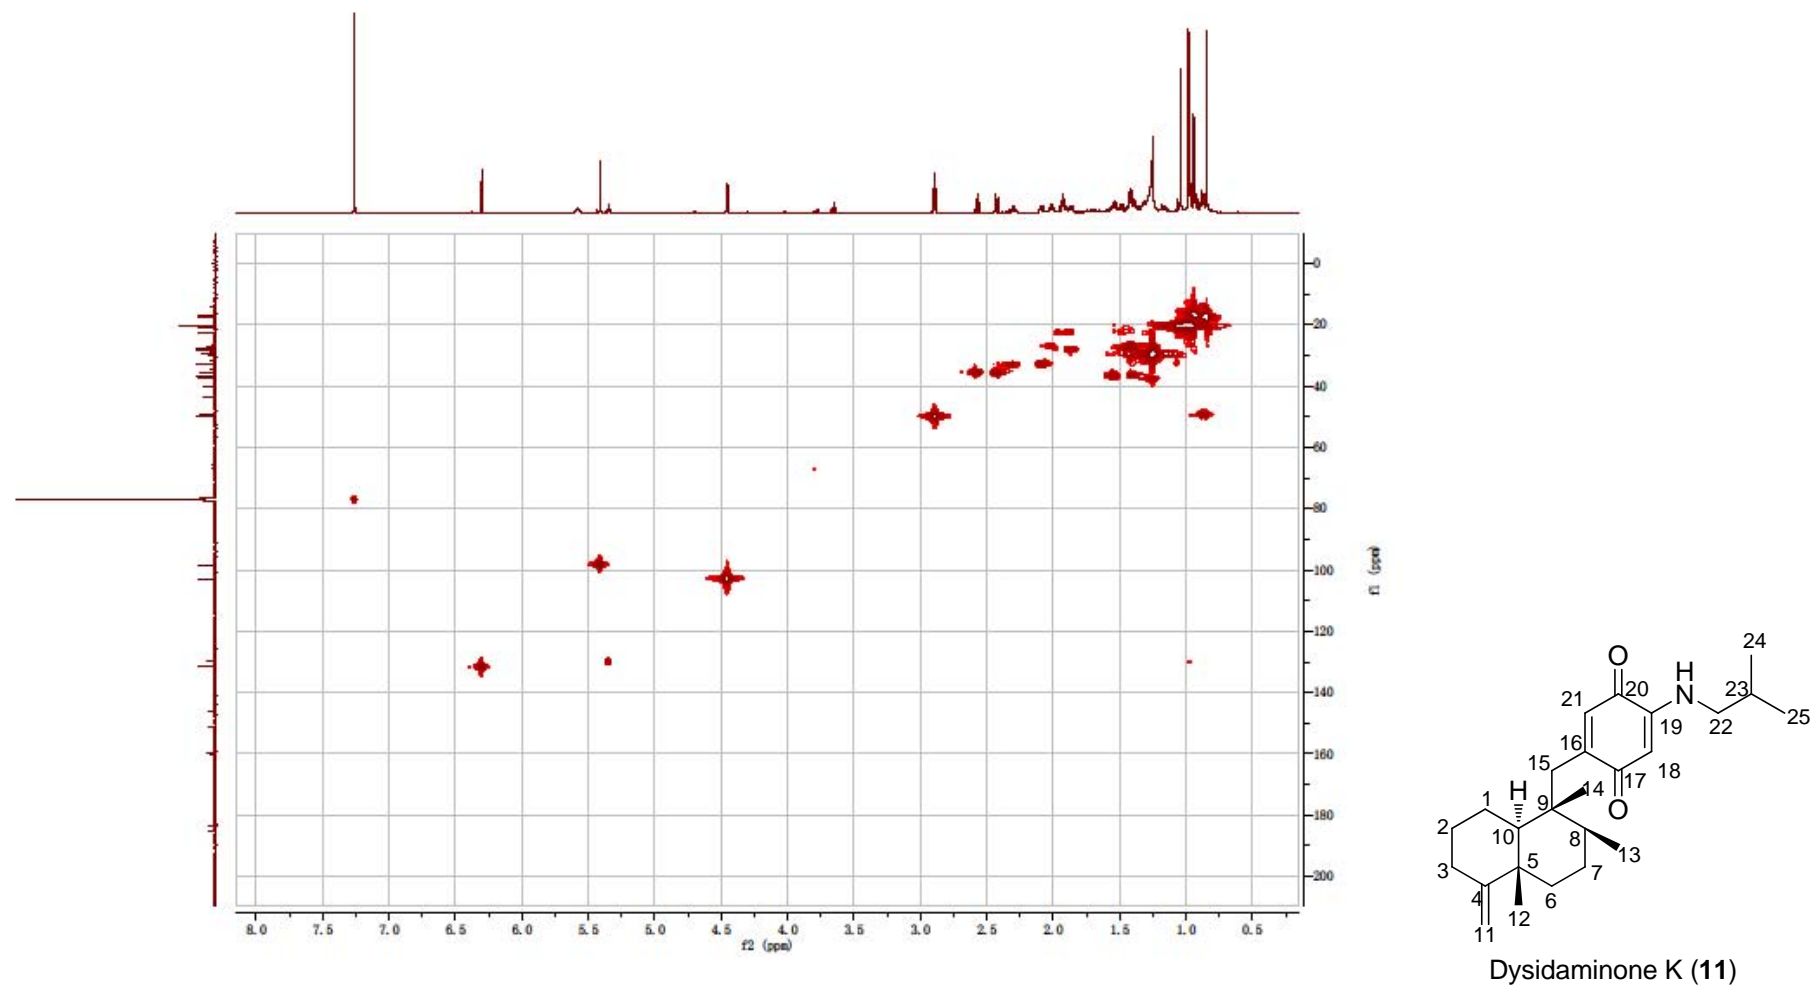

**Figure S101.** HSQC Spectrum of Dysidaminone K (**11**) in CDCl<sub>3</sub>.

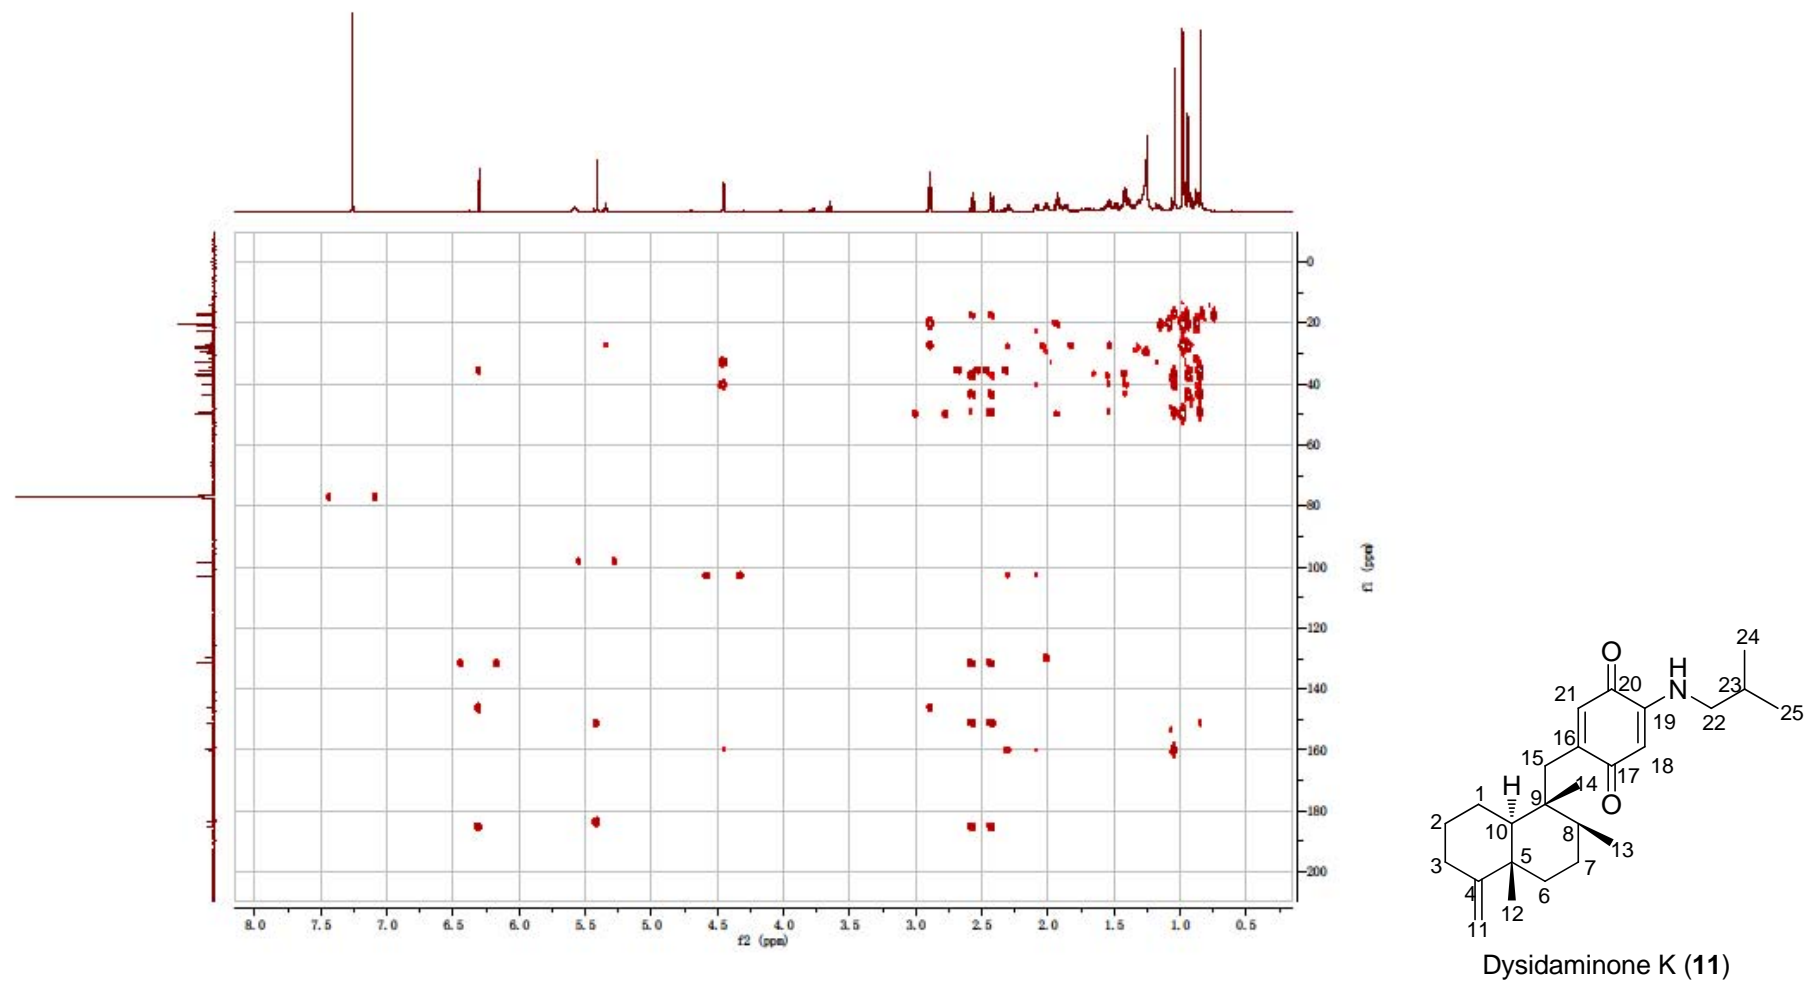

**Figure S102.** HMBC Spectrum of Dysidaminone K (**11**) in CDCl<sub>3</sub>.

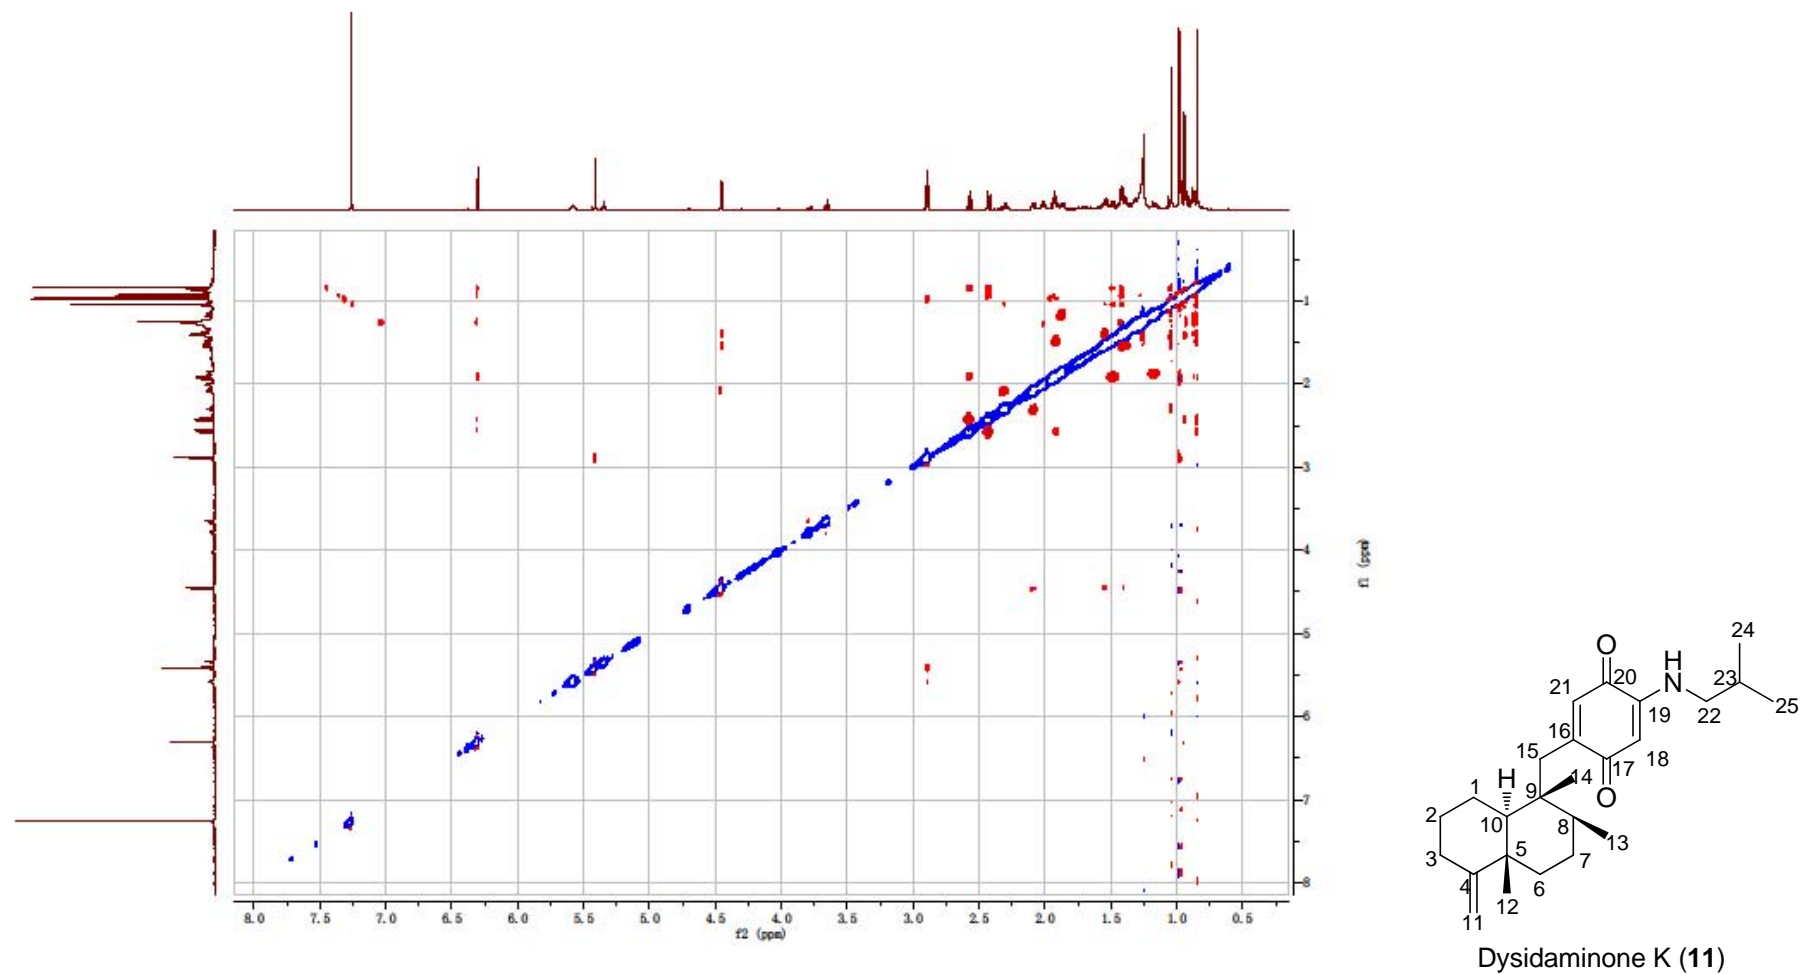

**Figure S103.** NOESY Spectrum of Dysidaminone K (**11**) in CDCl<sub>3</sub>.

## Elemental Composition Report

Page 1

Tolerance = 10.0 PPM / DBE: min = -1.5, max = 50.0  
Selected filters: None

Monoisotopic Mass, Even Electron Ions  
9 formula(e) evaluated with 1 results within limits (up to 50 closest results for each mass)

Elements Used:

C: 10-27 H: 10-40 N: 1-1 O: 1-4

SIPI

XT-39 M.W=383

WQ13-096H 33 (1.162) AM (Cen,4, 80.00, Ar,5000.0,393.09,0.70); Sm (SG, 2x3.00); Cm (28:34)

Q-ToF micro  
YA019

29-Apr-2013, 14:34:49

TOF MS ES+  
7.01e3

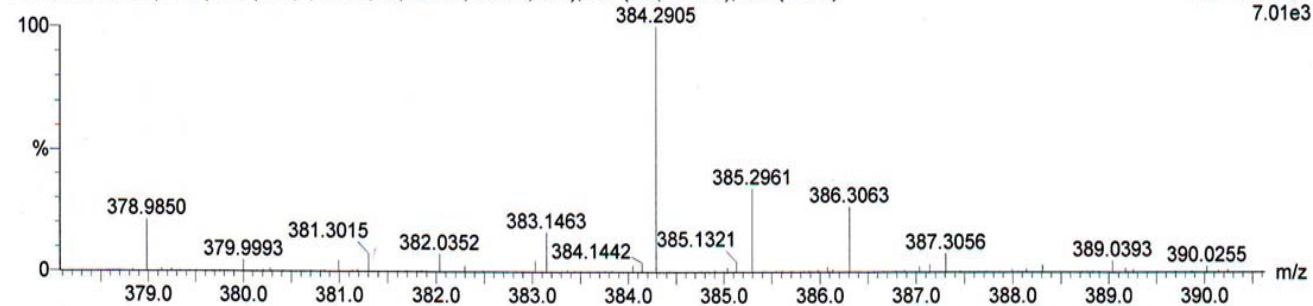

| Minimum: | 60.00  |            |     |      |      |       |              |  |
|----------|--------|------------|-----|------|------|-------|--------------|--|
| Maximum: | 100.00 |            | 5.0 | 10.0 | 50.0 |       |              |  |
| Mass     | RA     | Calc. Mass | mDa | PPM  | DBE  | i-FIT | Formula      |  |
| 384.2905 | 100.00 | 384.2903   | 0.2 | 0.5  | 7.5  | 661.9 | C25 H38 N O2 |  |

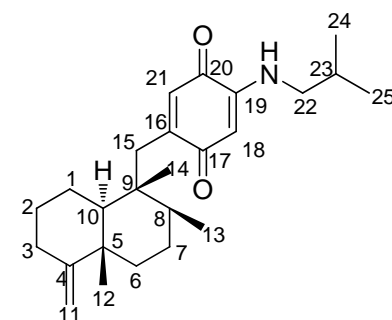

Dysidaminone K (11)

Figure S104. HRESIMS of Dysidaminone K (11).

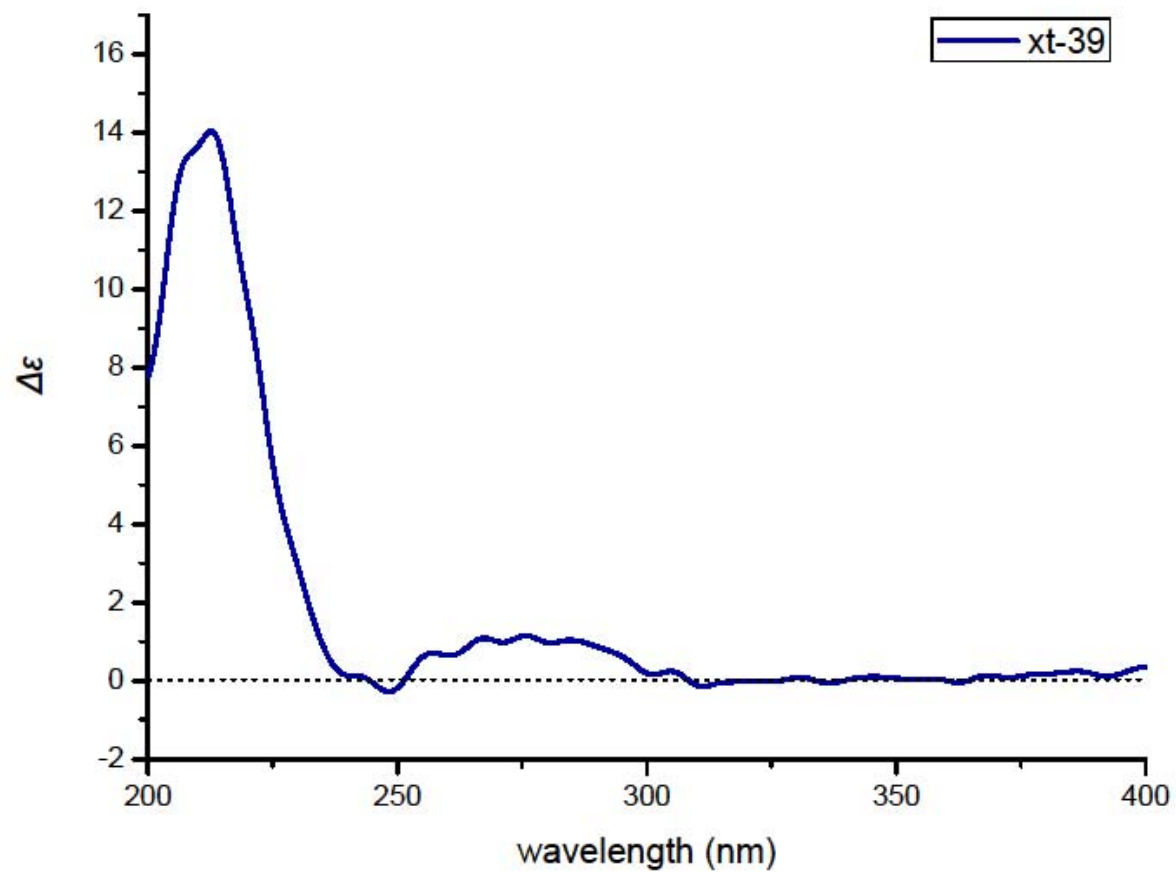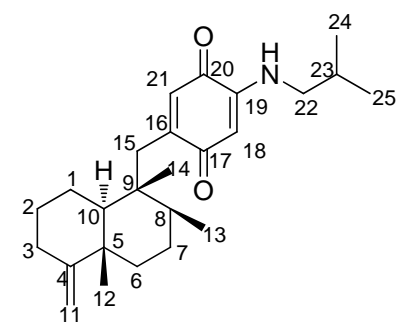

Dysidaminone K (11)

**Figure S105.** CD Spectrum of Dysidaminone K (11) in MeOH.

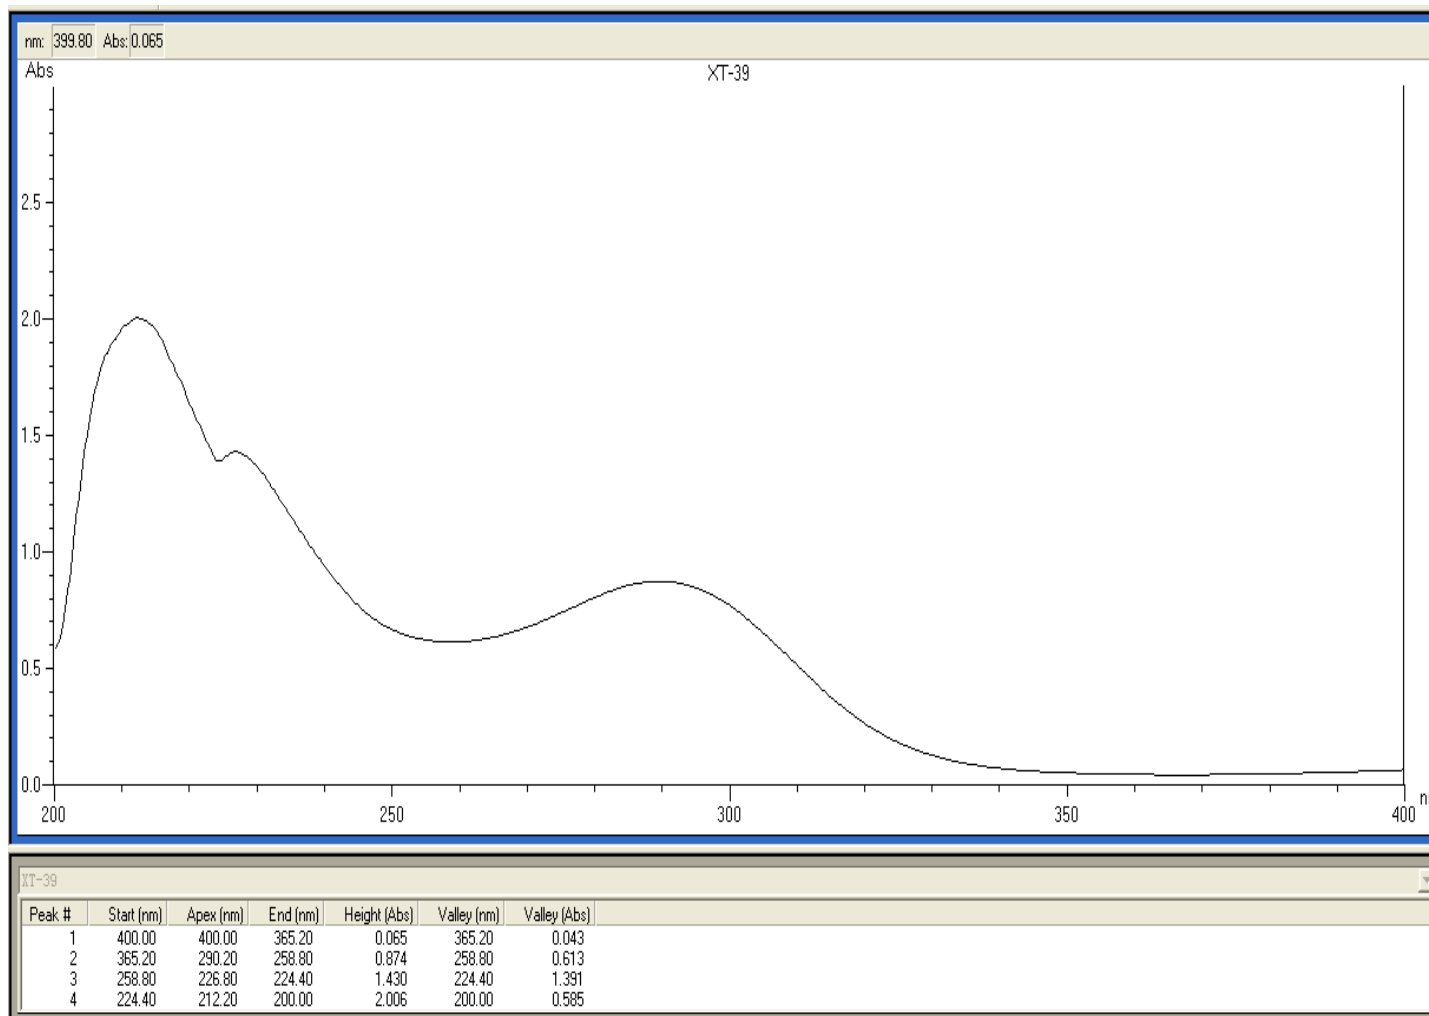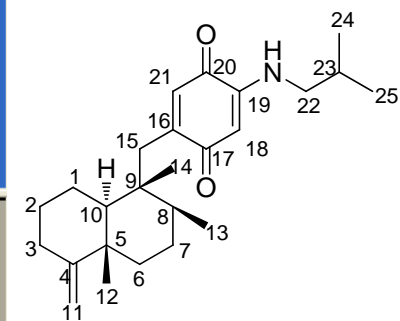

Dysidaminone K (11)

**Figure S106.** UV Spectrum of Dysidaminone K (11) in MeOH.



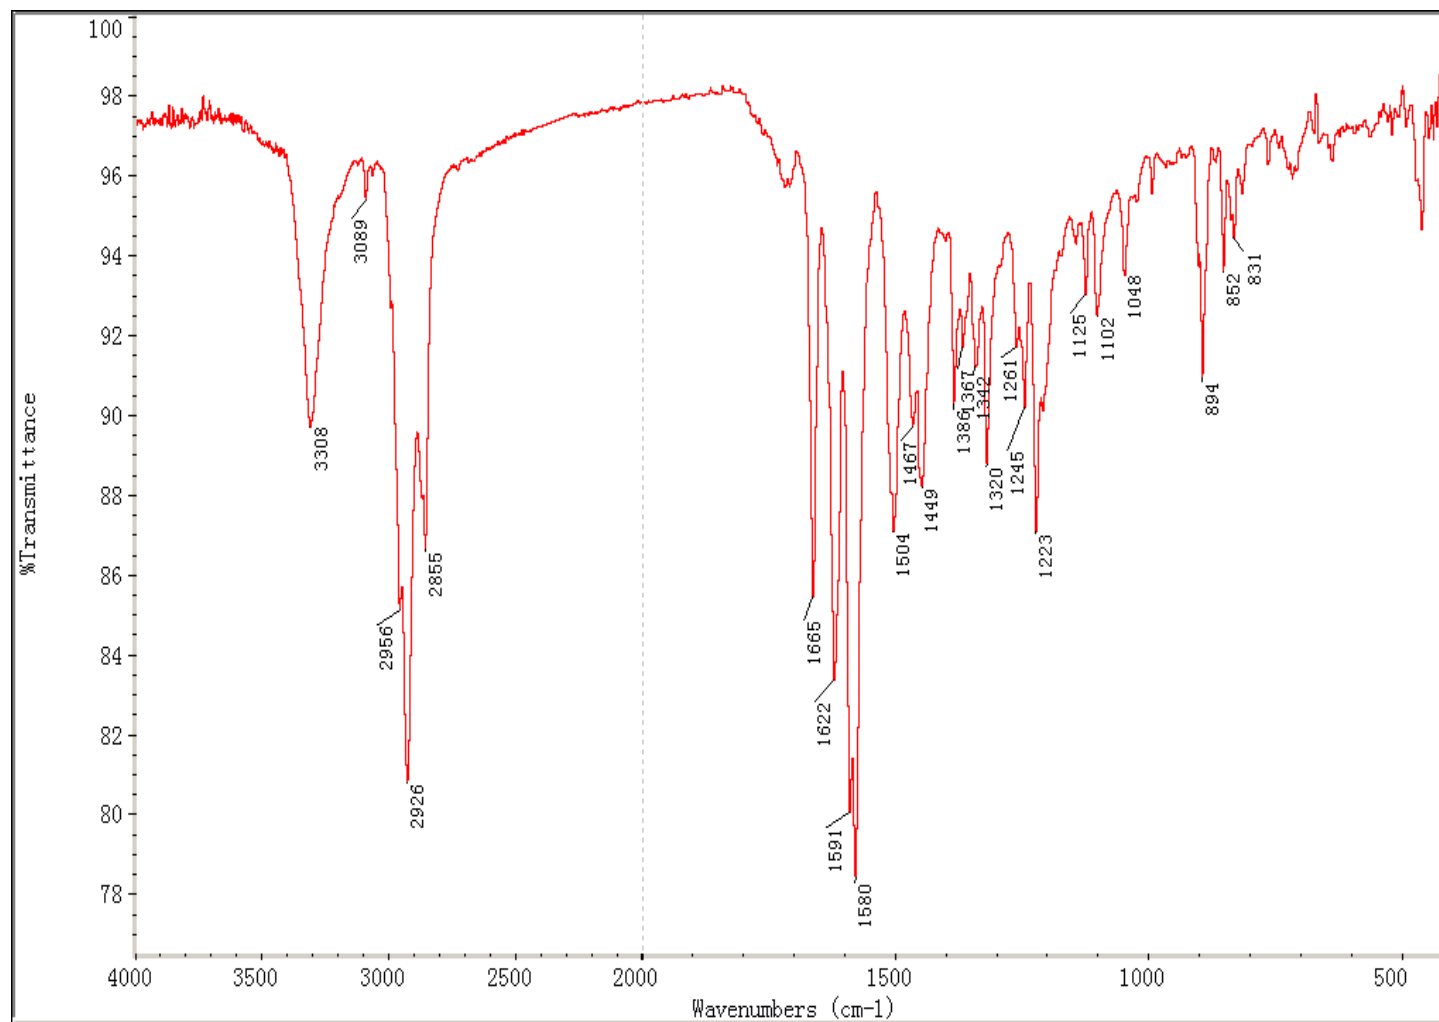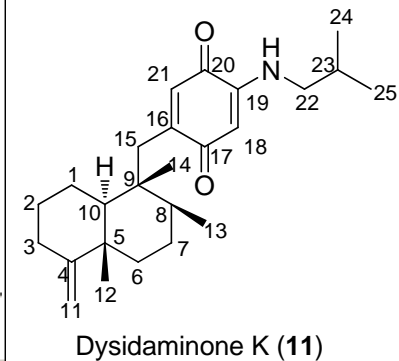

**Figure S107.** IR Spectrum of Dysidaminone K (11).

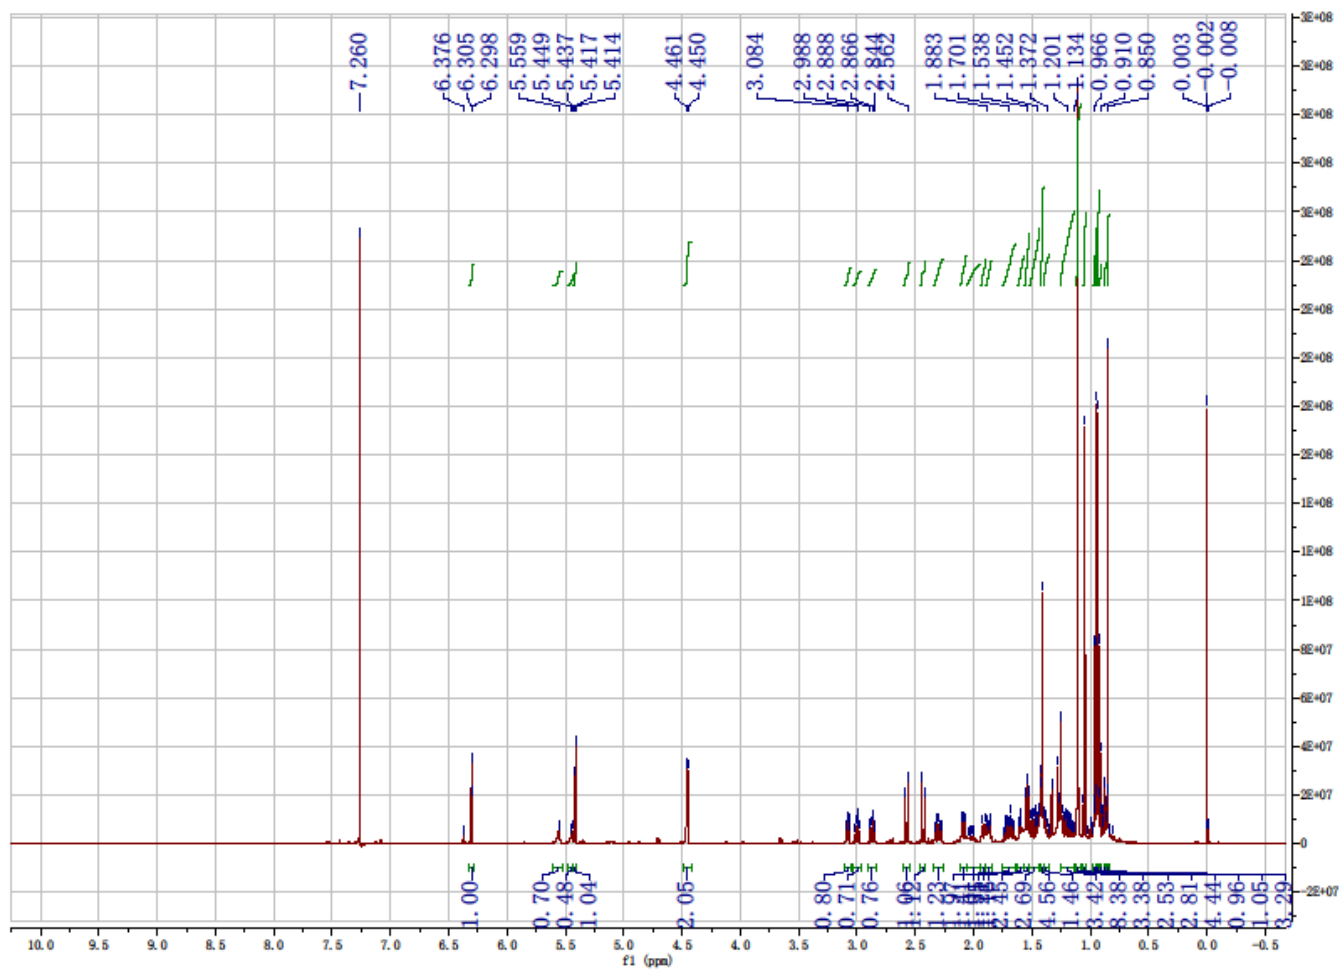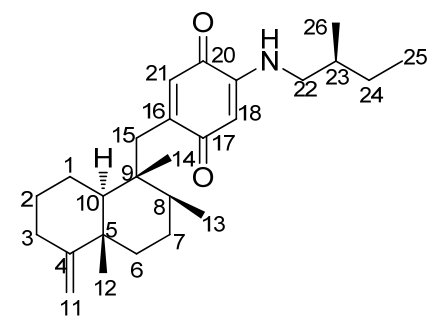

Dysidaminone L (12)

Figure S108.  $^1\text{H}$  NMR Spectrum of Dysidaminone L (12) in  $\text{CDCl}_3$ .

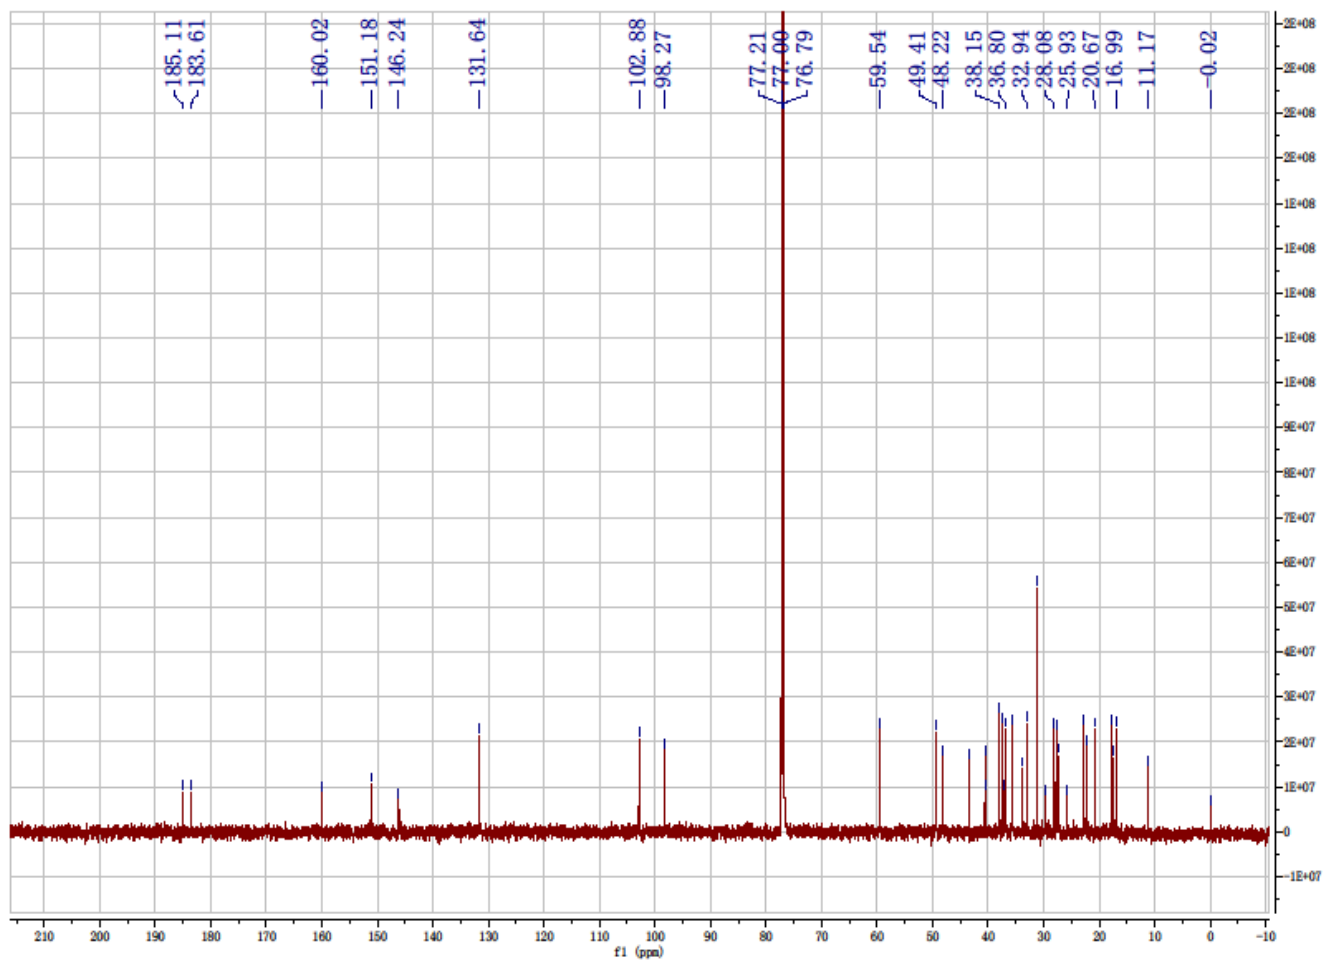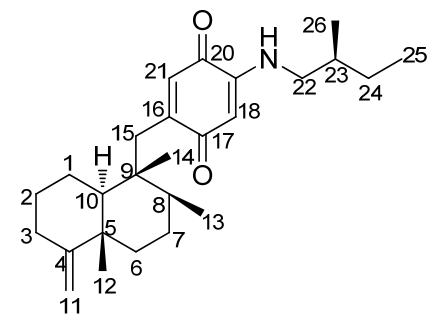

Dysidaminone L (**12**)

**Figure S109.**  $^{13}\text{C}$  NMR Spectrum of Dysidaminone L (**12**) in  $\text{CDCl}_3$ .

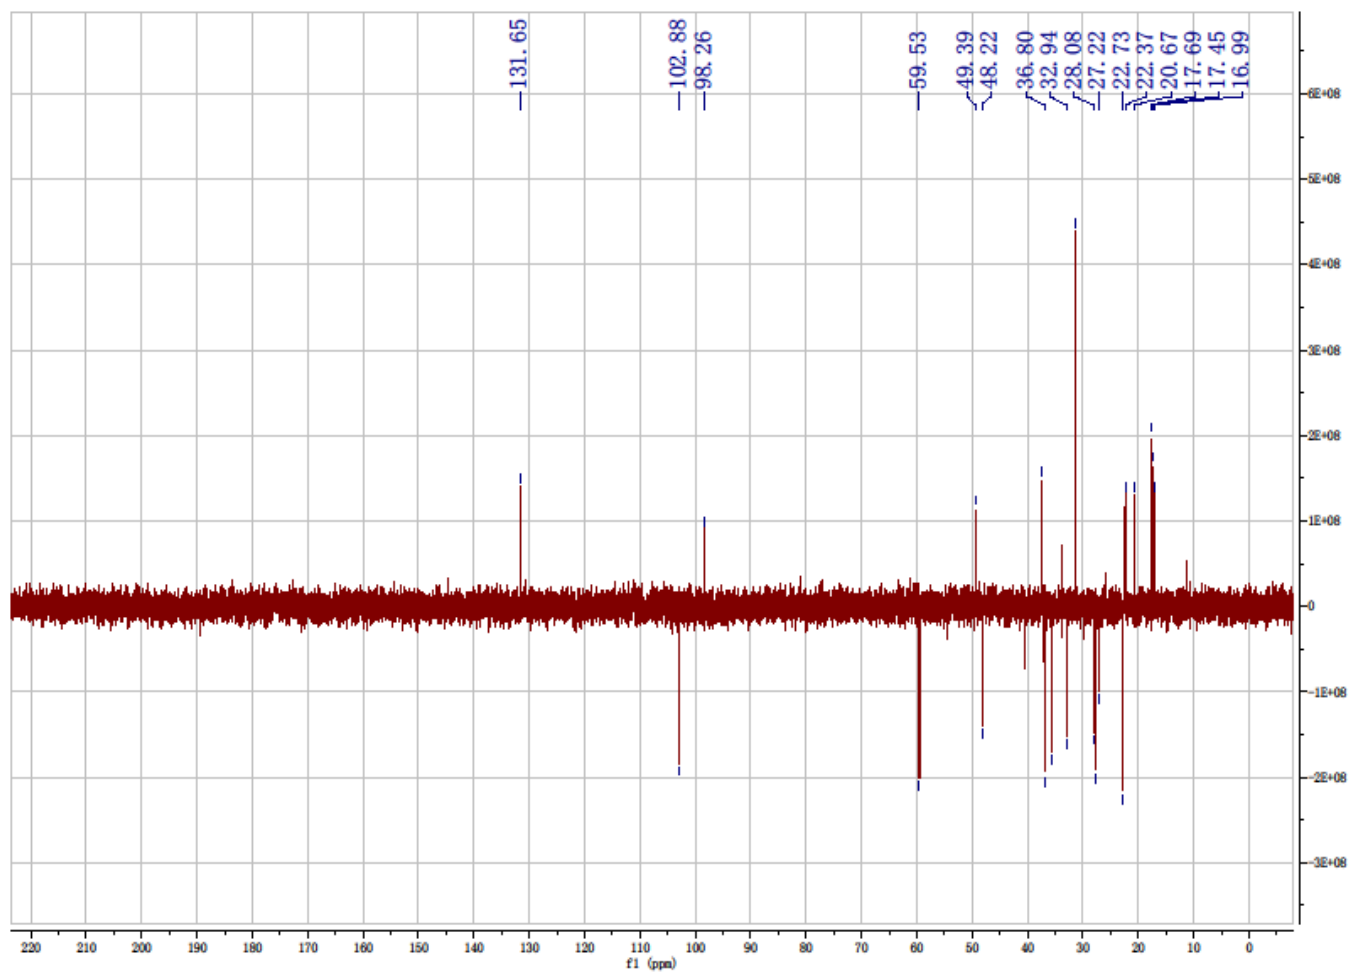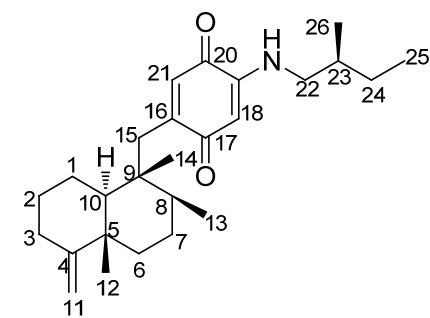

Dysidaminone L (12)

Figure S110. DEPT135 Spectrum of Dysidaminone L (12) in  $\text{CDCl}_3$ .

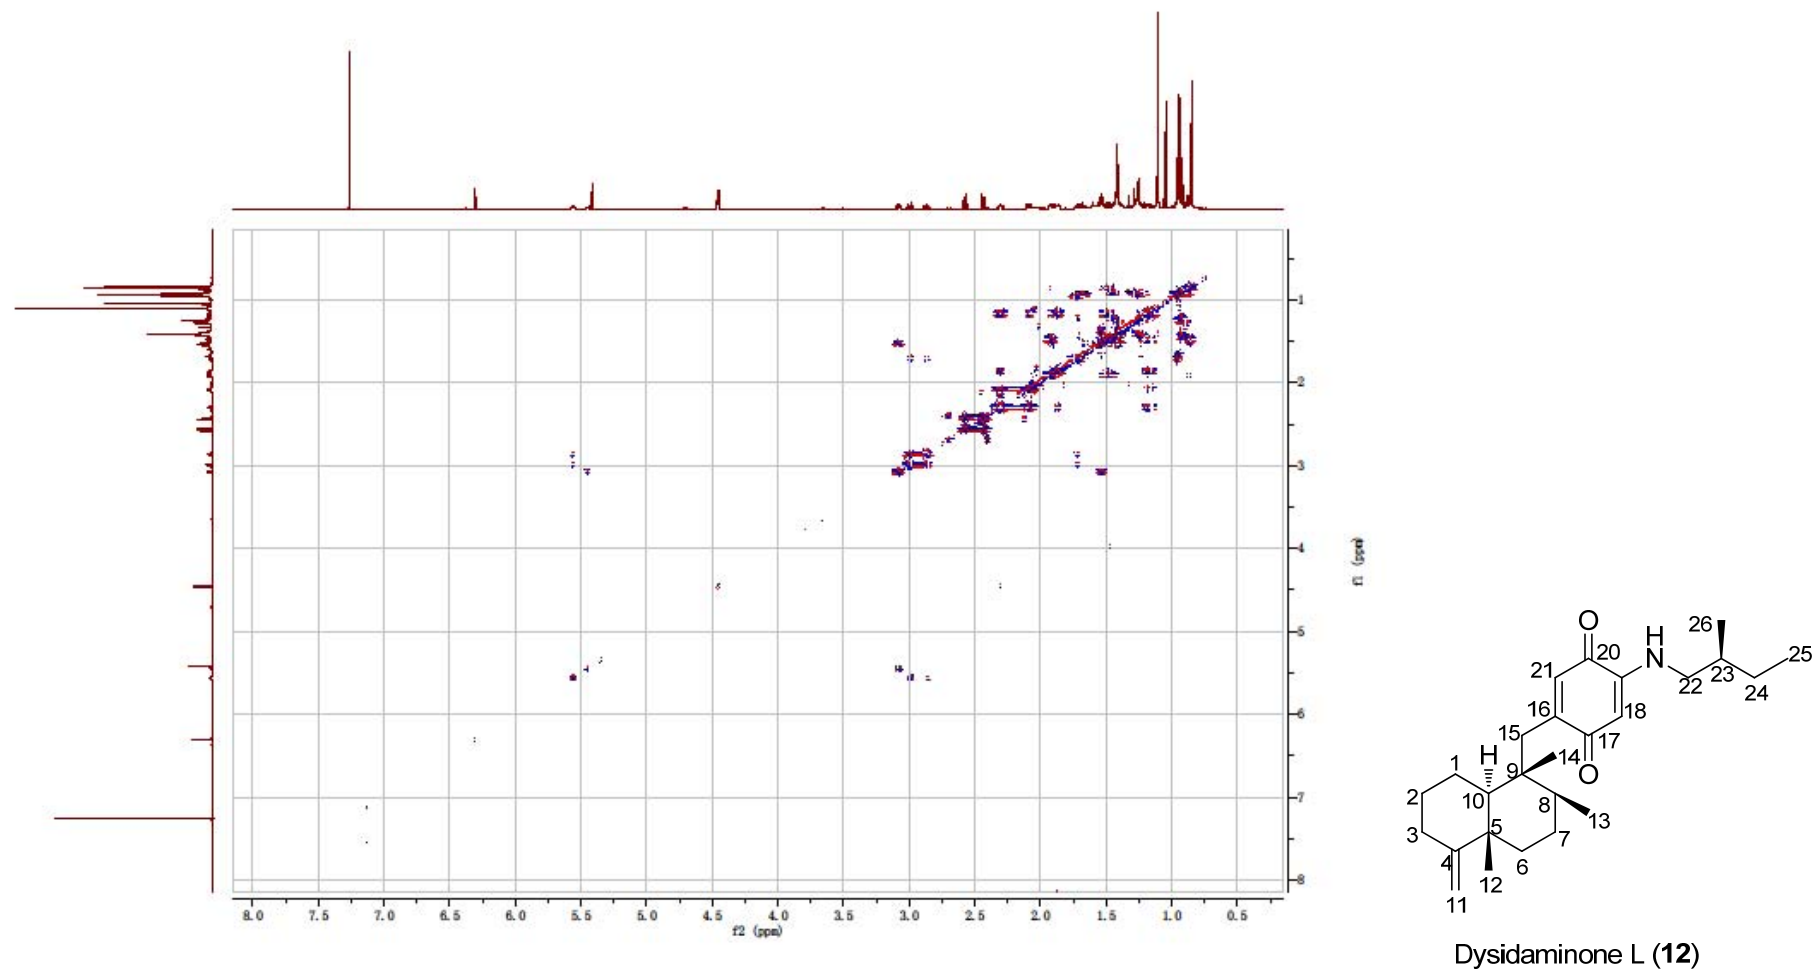

**Figure S111.**  $^1\text{H}$ - $^1\text{H}$  COSY Spectrum of Dysidaminone L (12) in  $\text{CDCl}_3$ .

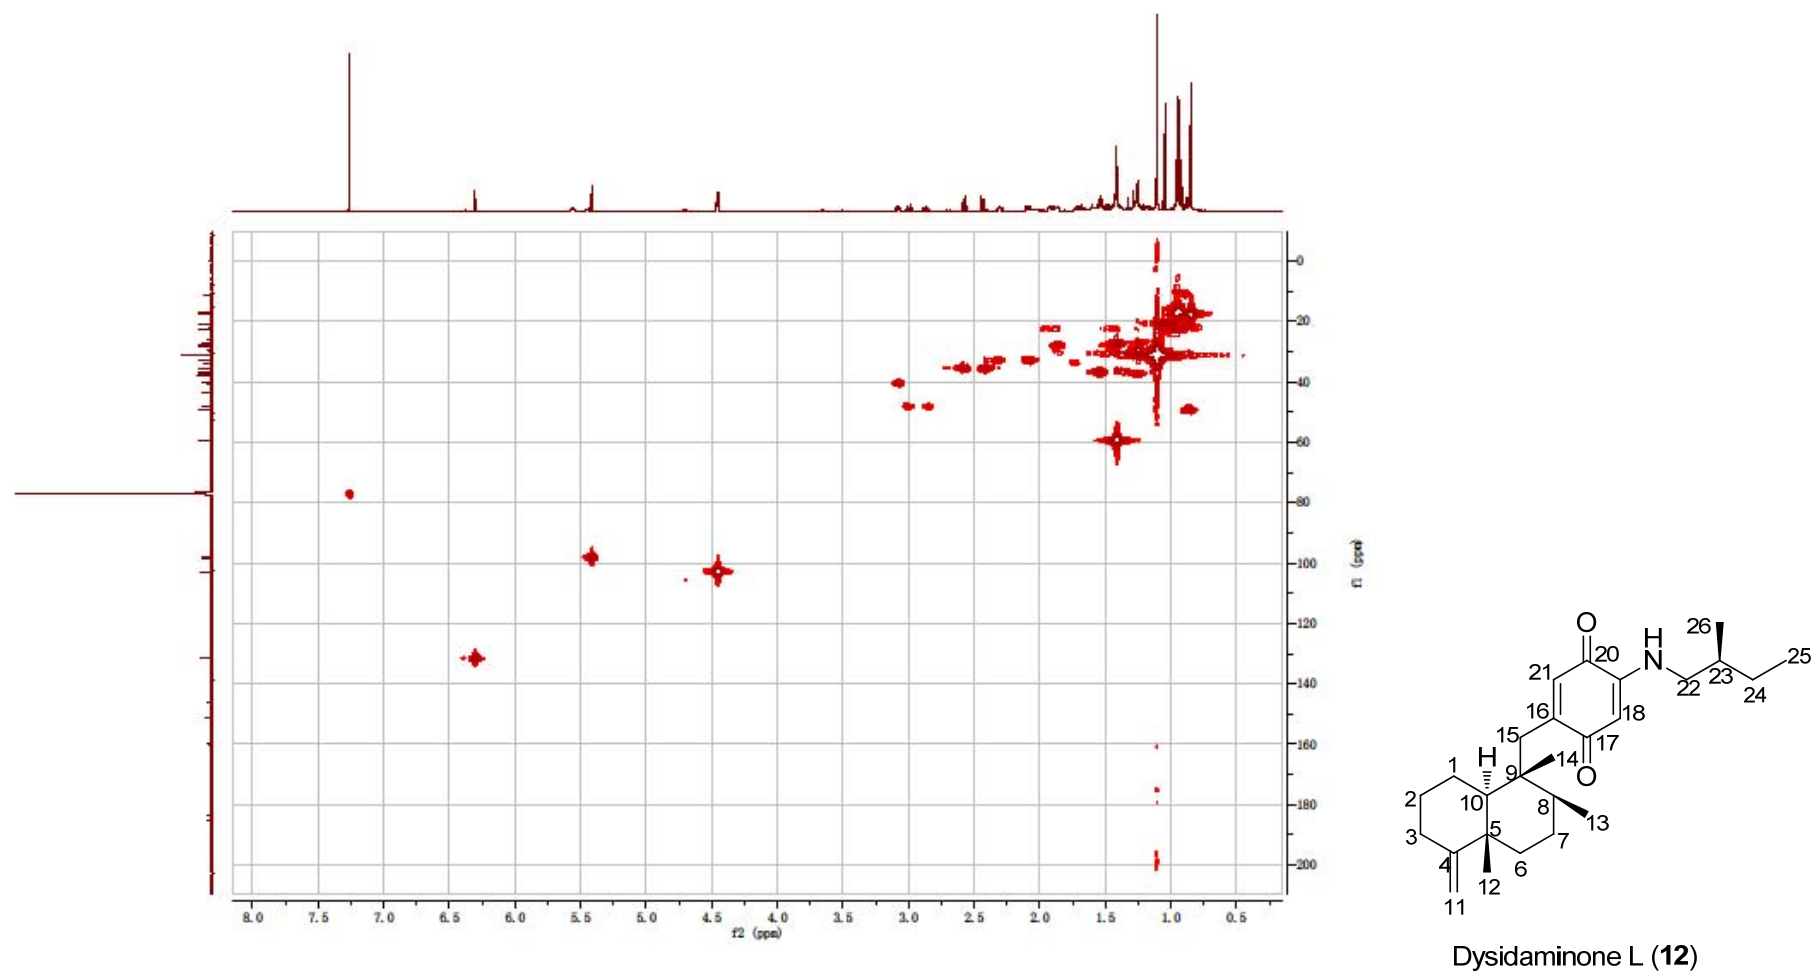

**Figure S112.** HSQC Spectrum of Dysidaminone L (**12**) in CDCl<sub>3</sub>.

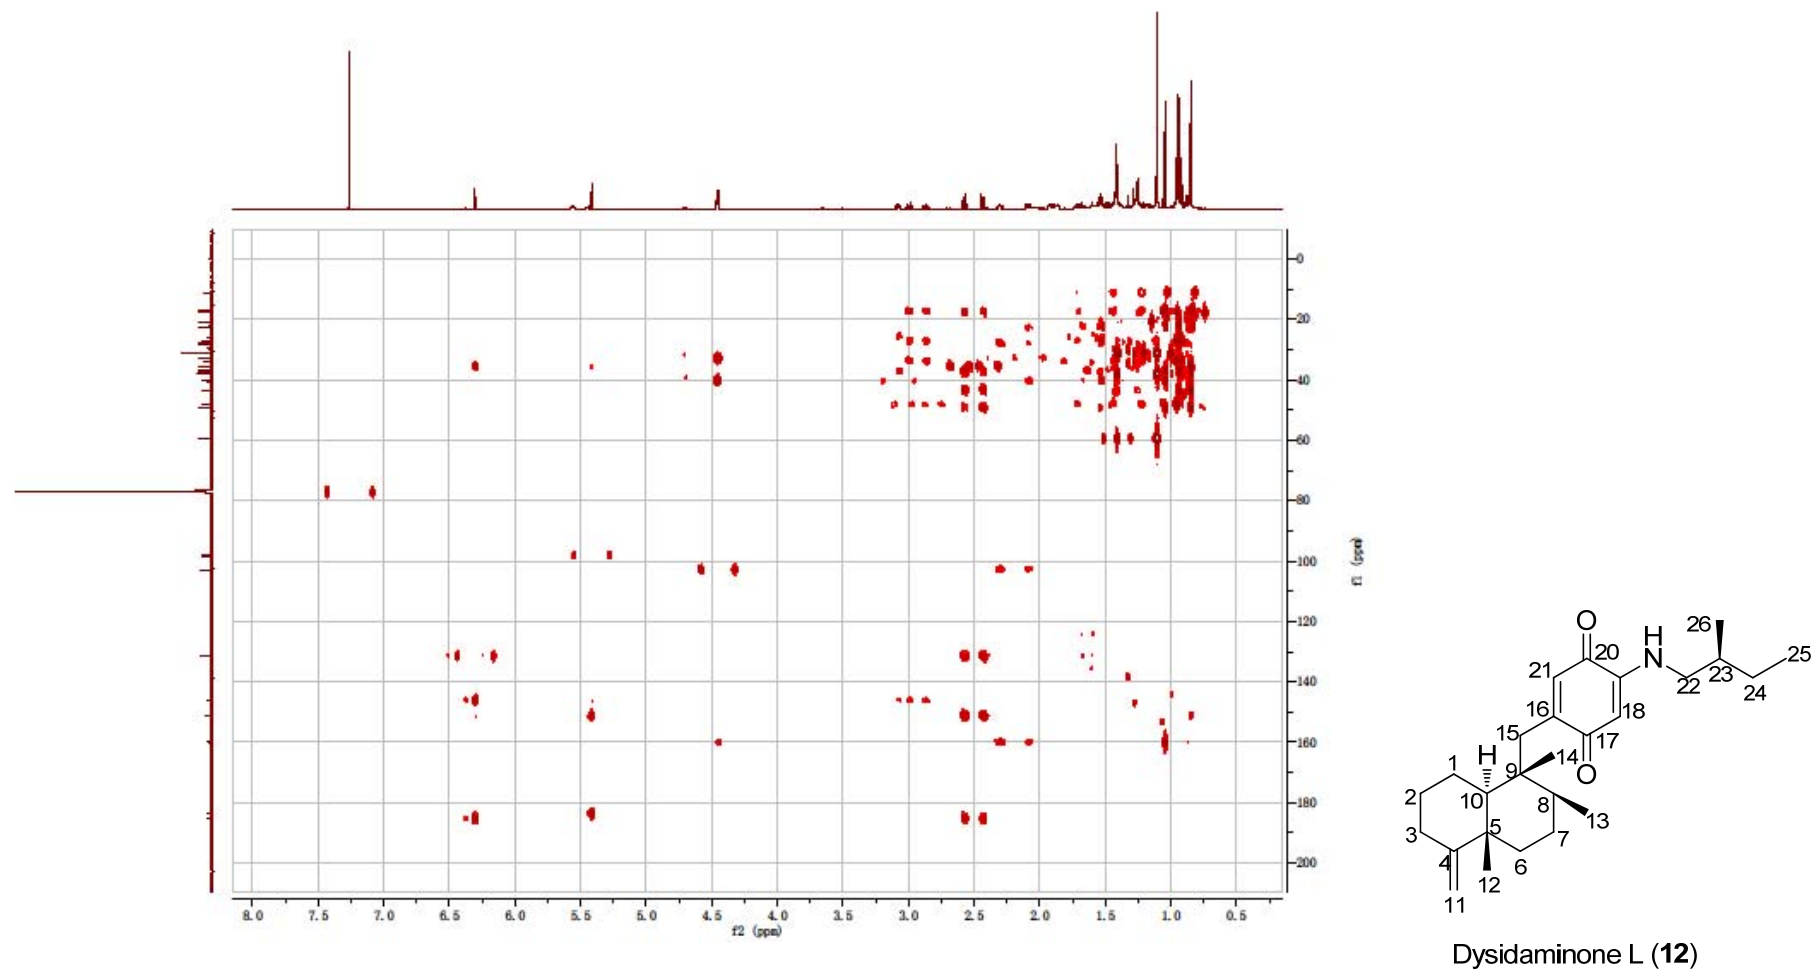

**Figure S113.** HMBC Spectrum of Dysidaminone L (**12**) in CDCl<sub>3</sub>.

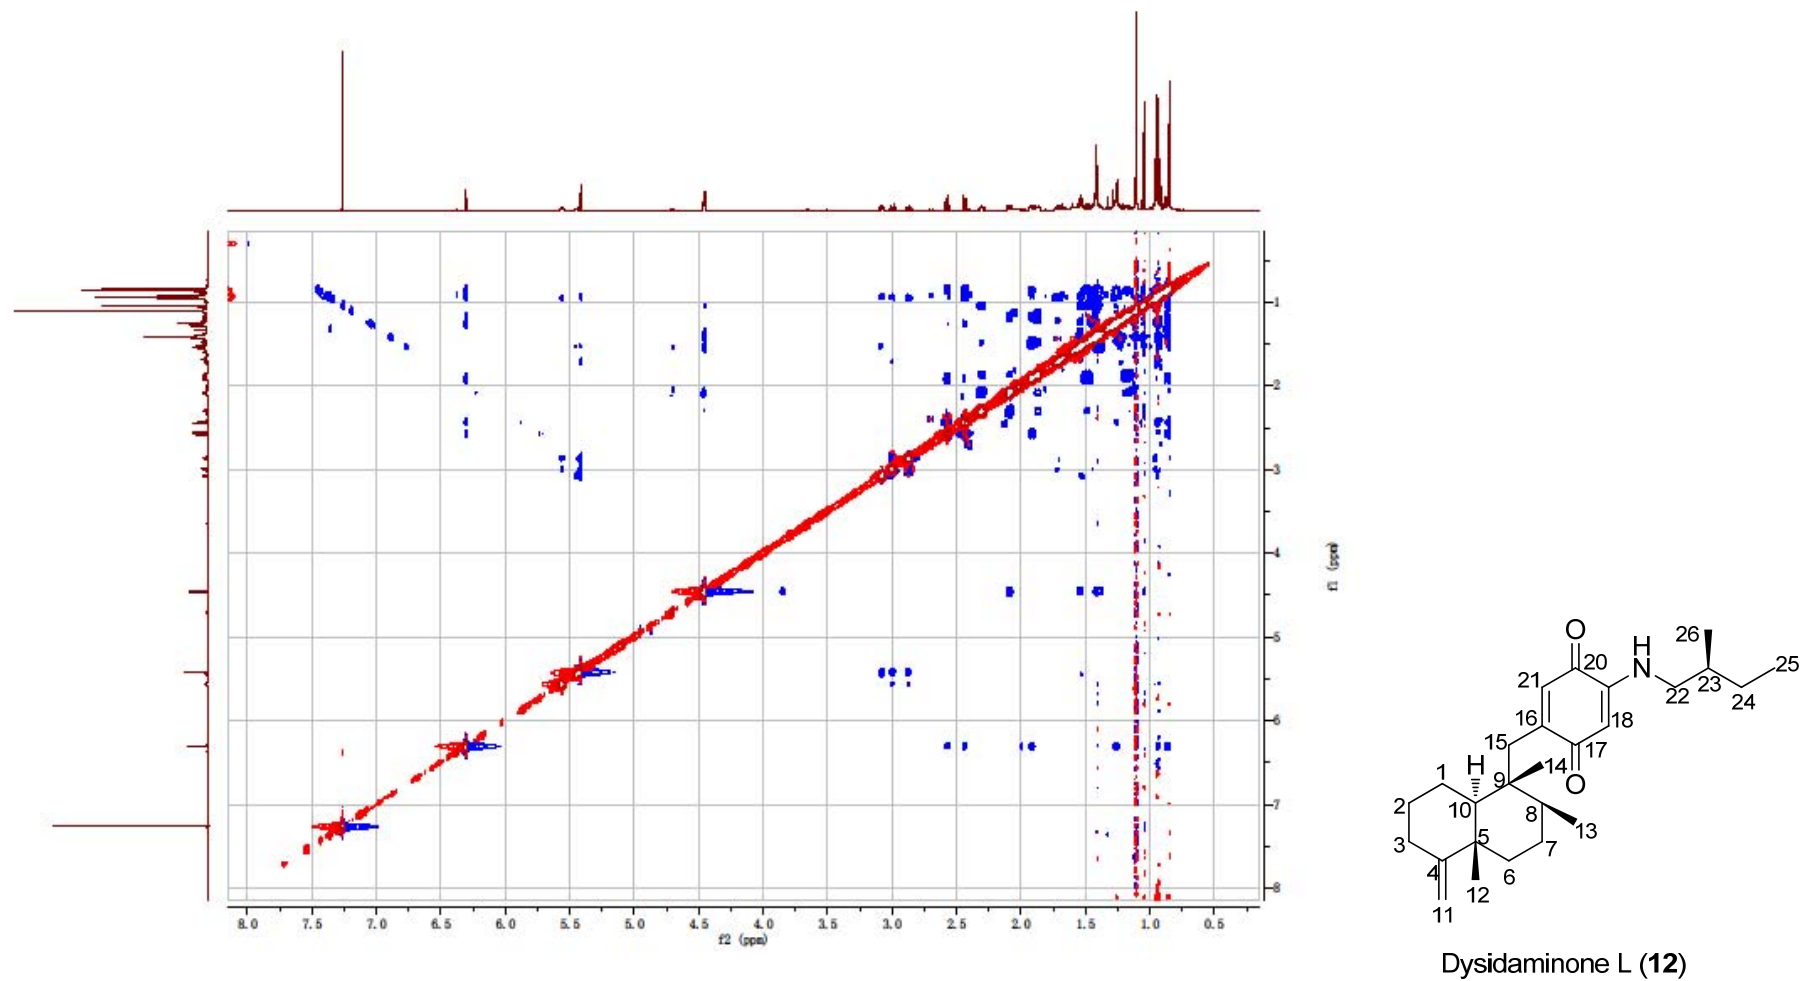

**Figure S114.** NOESY Spectrum of Dysidaminone L (**12**) in CDCl<sub>3</sub>.



## Elemental Composition Report

Page 1

Tolerance = 10.0 PPM / DBE: min = -1.5, max = 50.0  
Selected filters: None

Monoisotopic Mass, Even Electron Ions  
6 formula(e) evaluated with 1 results within limits (up to 50 closest results for each mass)

Elements Used:

C: 10-30 H: 10-50 N: 1-1 O: 1-2 Na: 1-1

SIP1

XT-41 M.W=397

WQ13-110H1 13 (0.449) AM (Cen,4, 80.00, Ar,5000.0,407.22,0.70); Sm (SG, 2x3.00); Cm (13:21)

Q-Tof micro  
YA019  
420.2880

08-May-2013,15:04:03

TOF MS ES+  
7.22e3

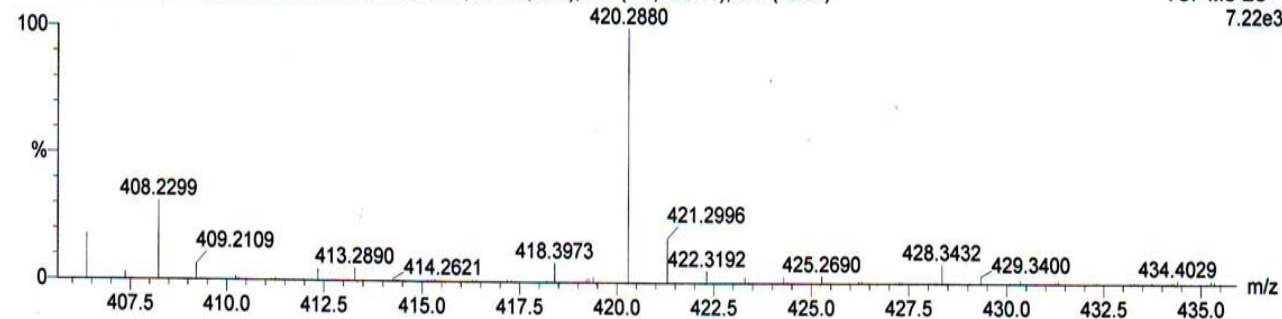

Minimum: 50.00

Maximum: 100.00

| Mass | RA | Calc. Mass | mDa | PPM | DBE | i-FIT | Formula |
|------|----|------------|-----|-----|-----|-------|---------|
|------|----|------------|-----|-----|-----|-------|---------|

|          |        |          |     |     |     |       |                 |
|----------|--------|----------|-----|-----|-----|-------|-----------------|
| 420.2880 | 100.00 | 420.2878 | 0.2 | 0.5 | 7.5 | 232.0 | C26 H39 N O2 Na |
|----------|--------|----------|-----|-----|-----|-------|-----------------|

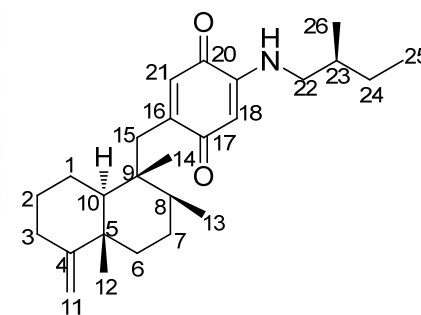

Dysidaminone L (**12**)

Figure S115. HRESIMS of Dysidaminone L (**12**).

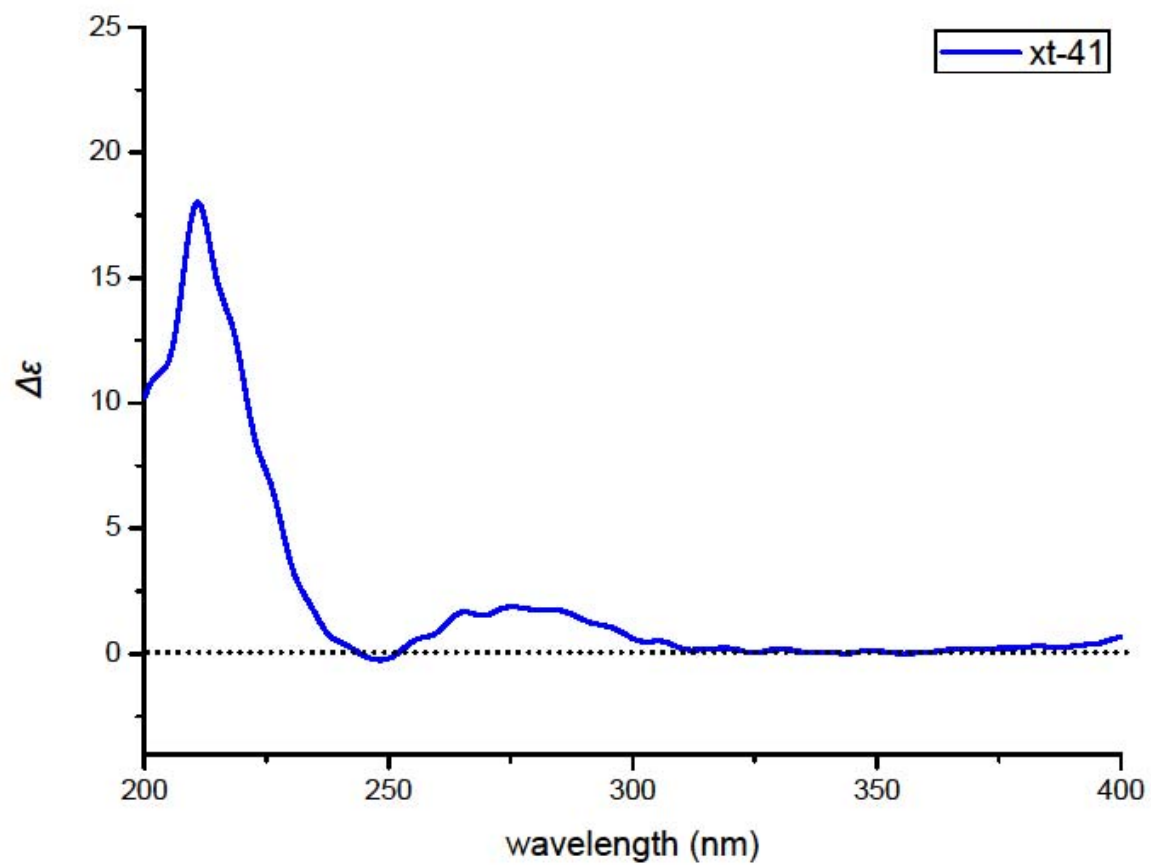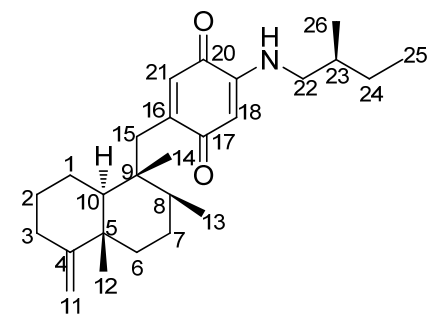

Dysidaminone L (**12**)

**Figure S116.** CD Spectrum of Dysidaminone L (**12**) in MeOH.

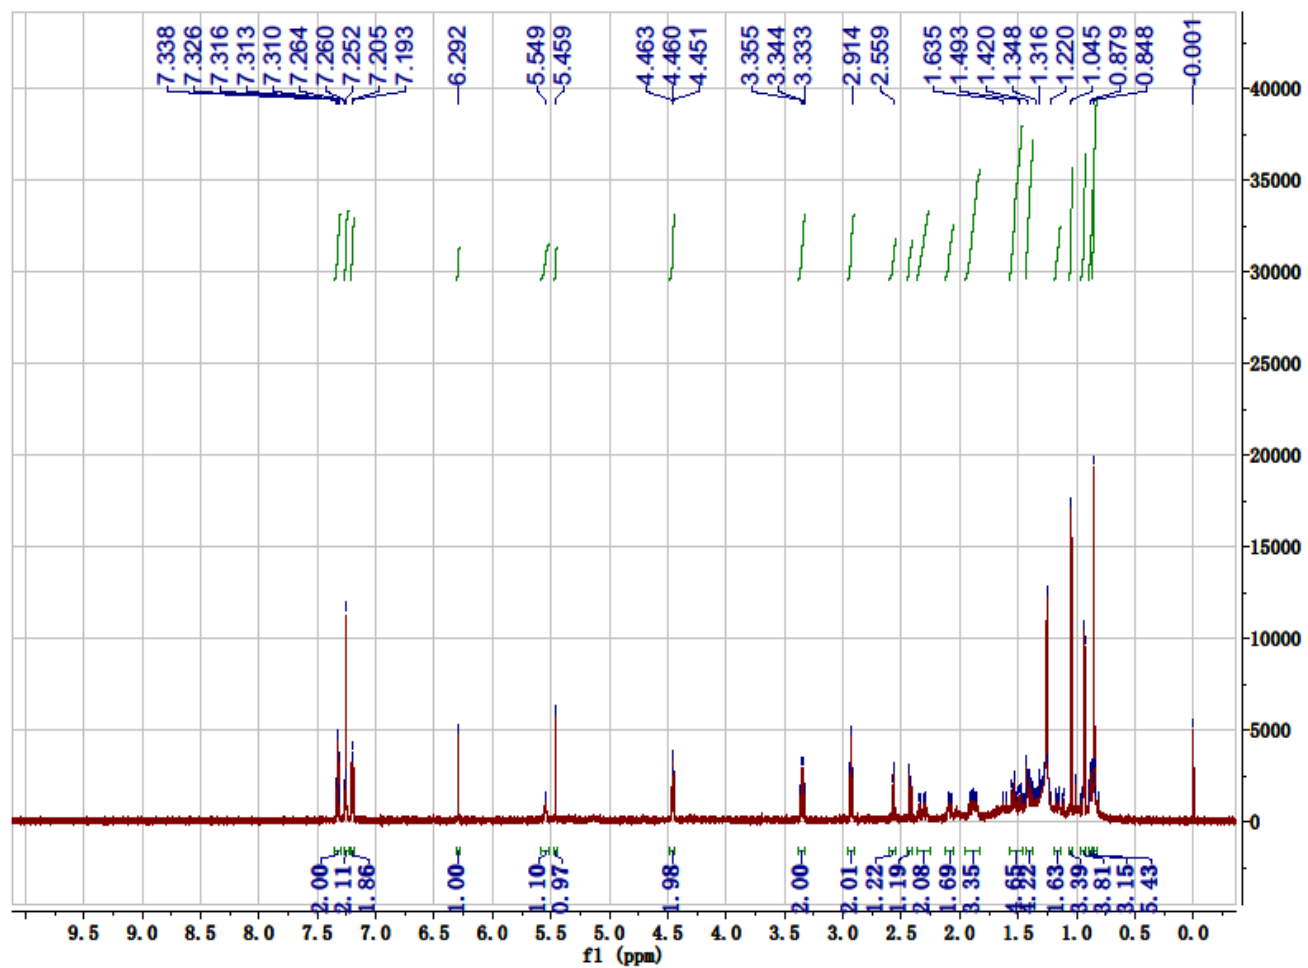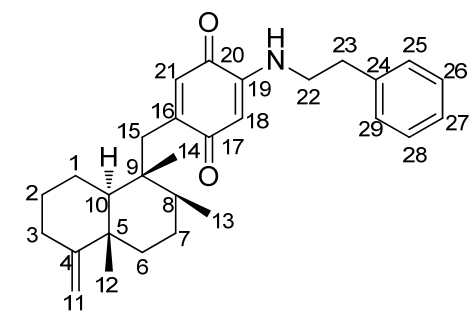

Dysidaminone M (**13**)

Figure S117.  $^1\text{H}$  NMR Spectrum of Dysidaminone M (**13**) in  $\text{CDCl}_3$ .

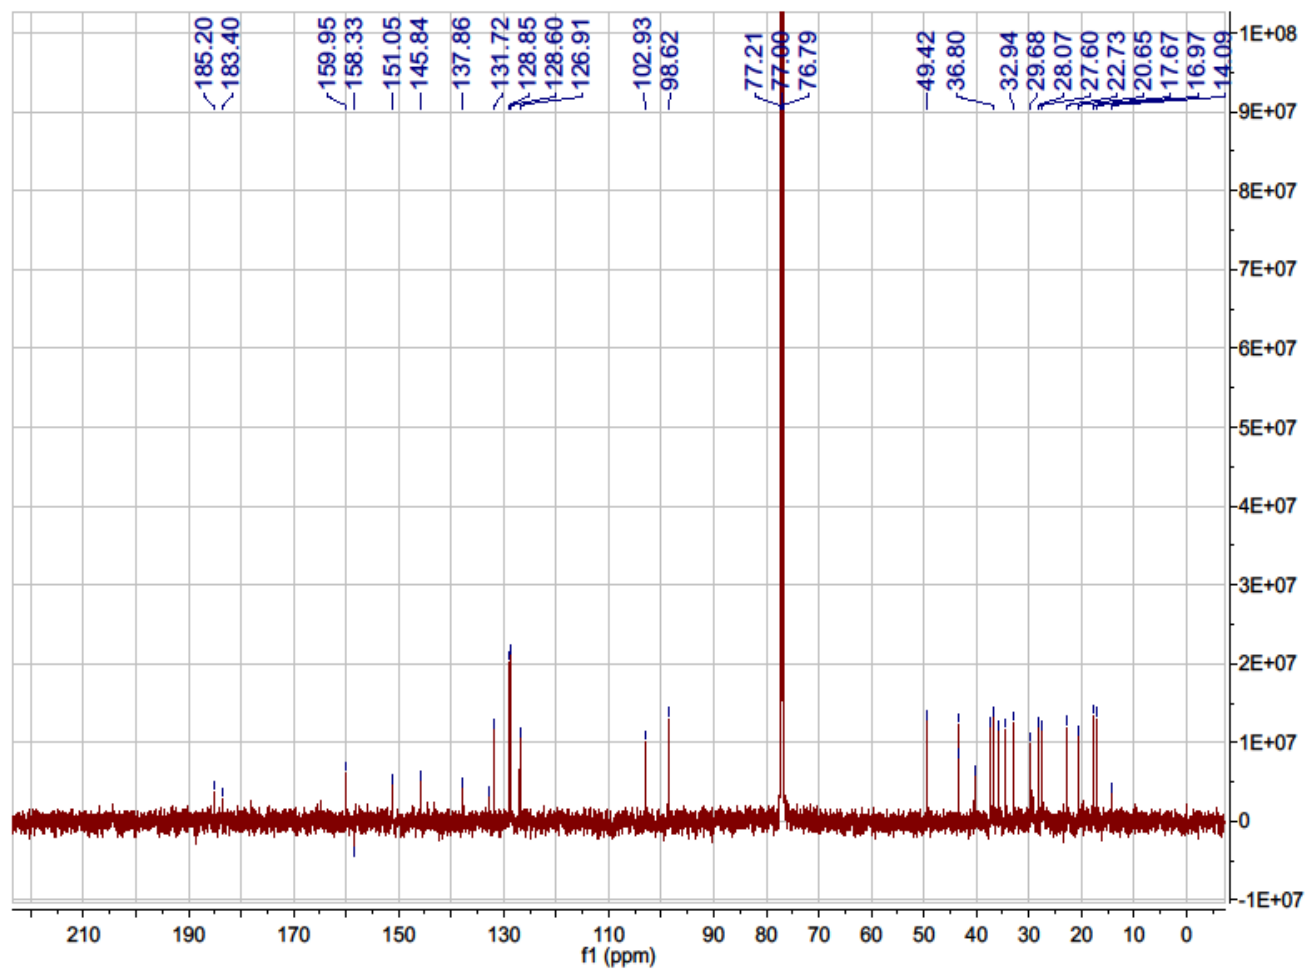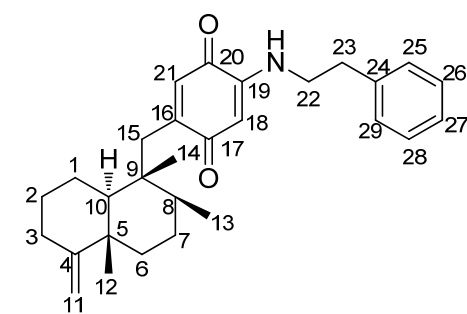

Dysidaminone M (13)

Figure S118.  $^{13}\text{C}$  NMR Spectrum of Dysidaminone M (13) in  $\text{CDCl}_3$ .

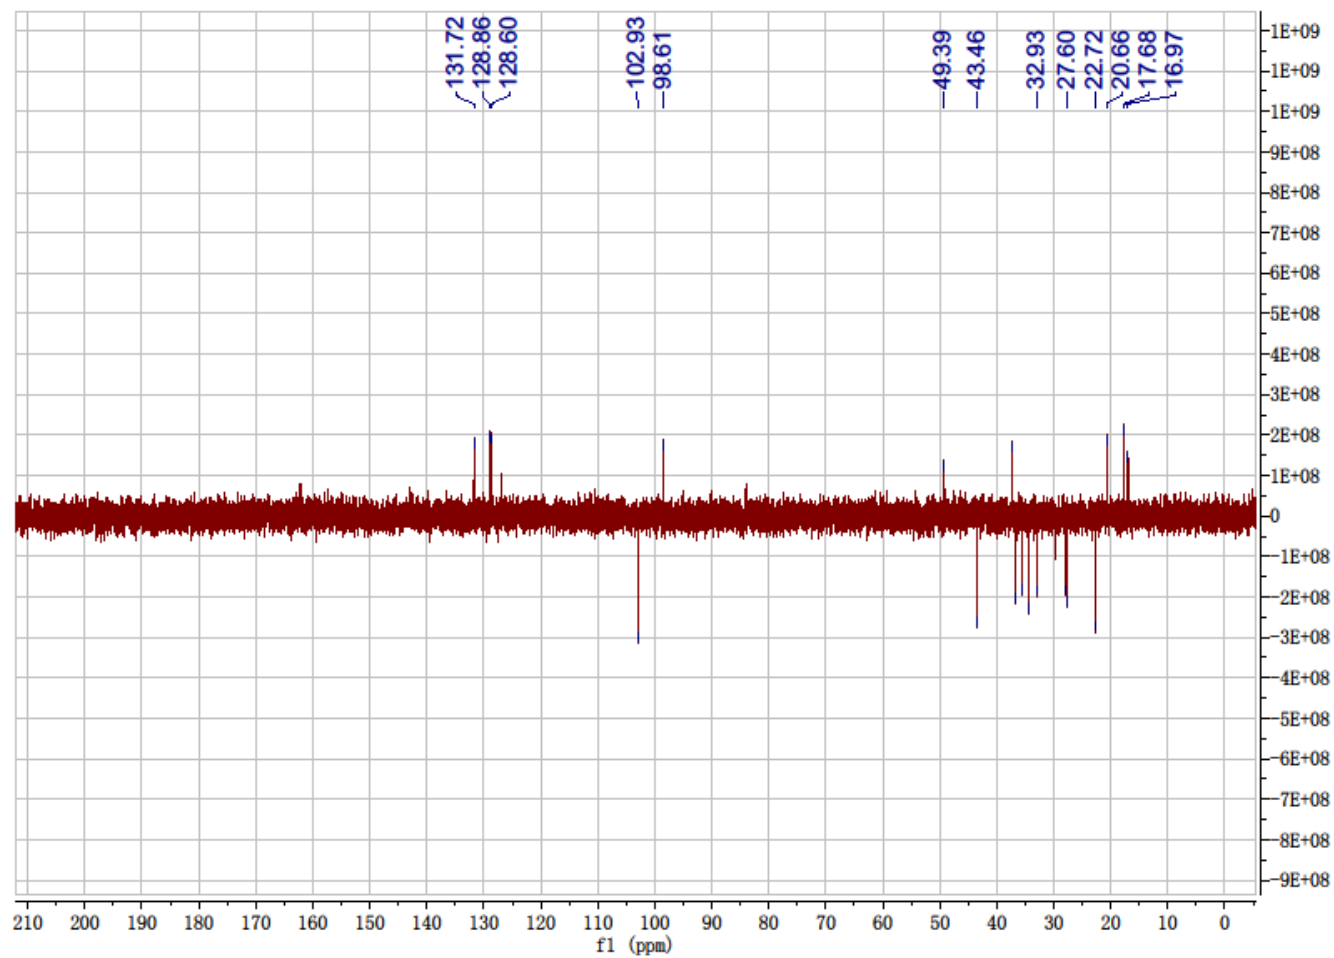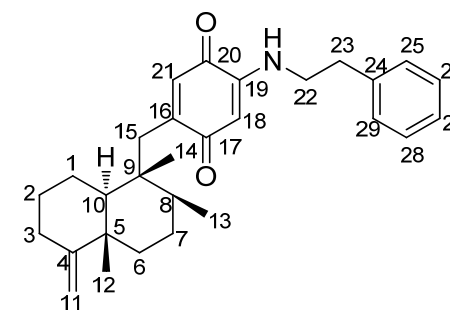

Dysidaminone M (**13**)

**Figure S119.** DEPT135 Spectrum of Dysidaminone M (**13**) in  $\text{CDCl}_3$ .

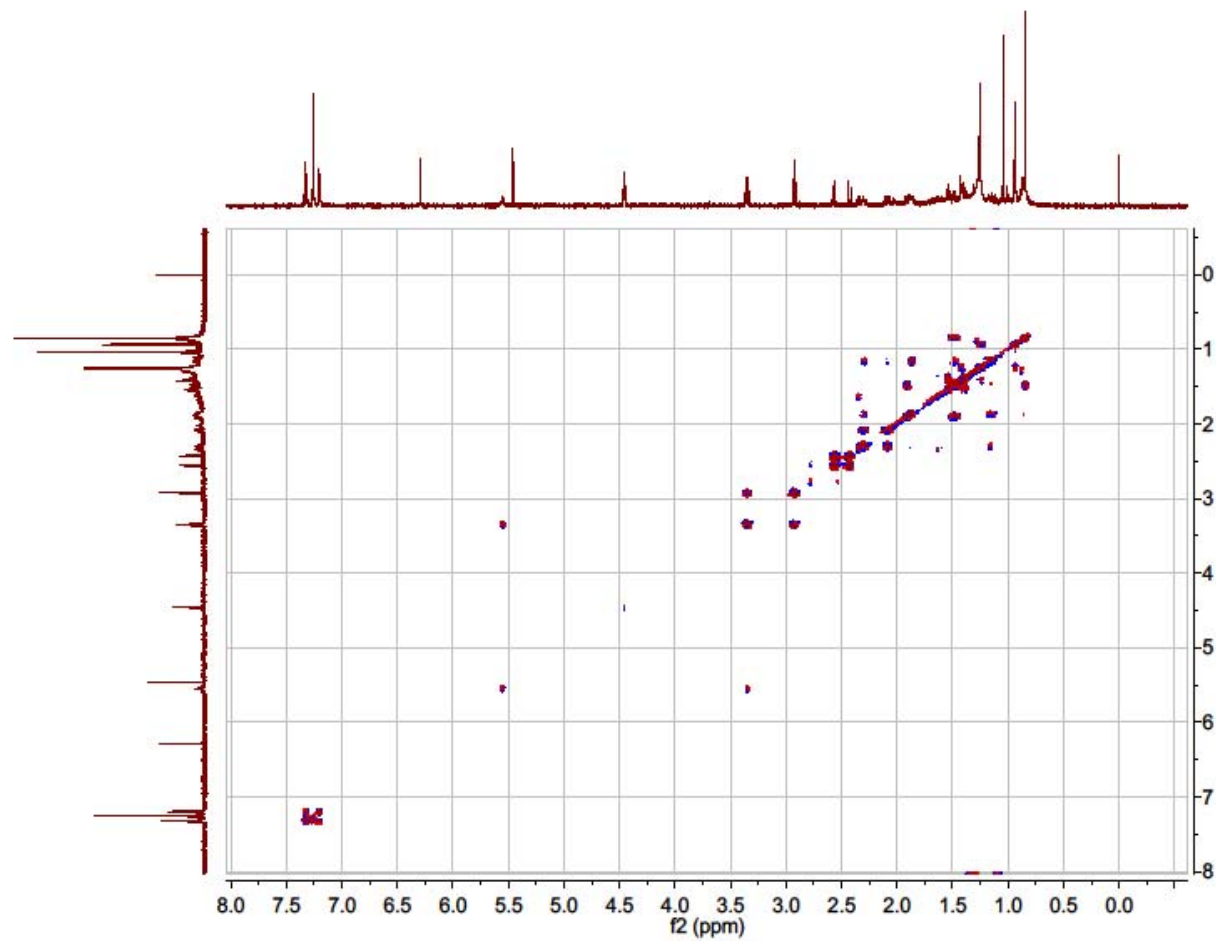

f1 (ppm)

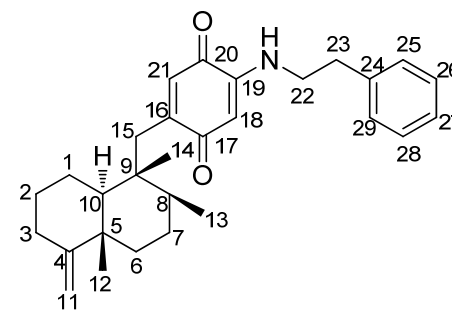

Dysidaminone M (**13**)

**Figure S120.**  $^1\text{H}$ - $^1\text{H}$  COSY Spectrum of Dysidaminone M (**13**) in  $\text{CDCl}_3$ .

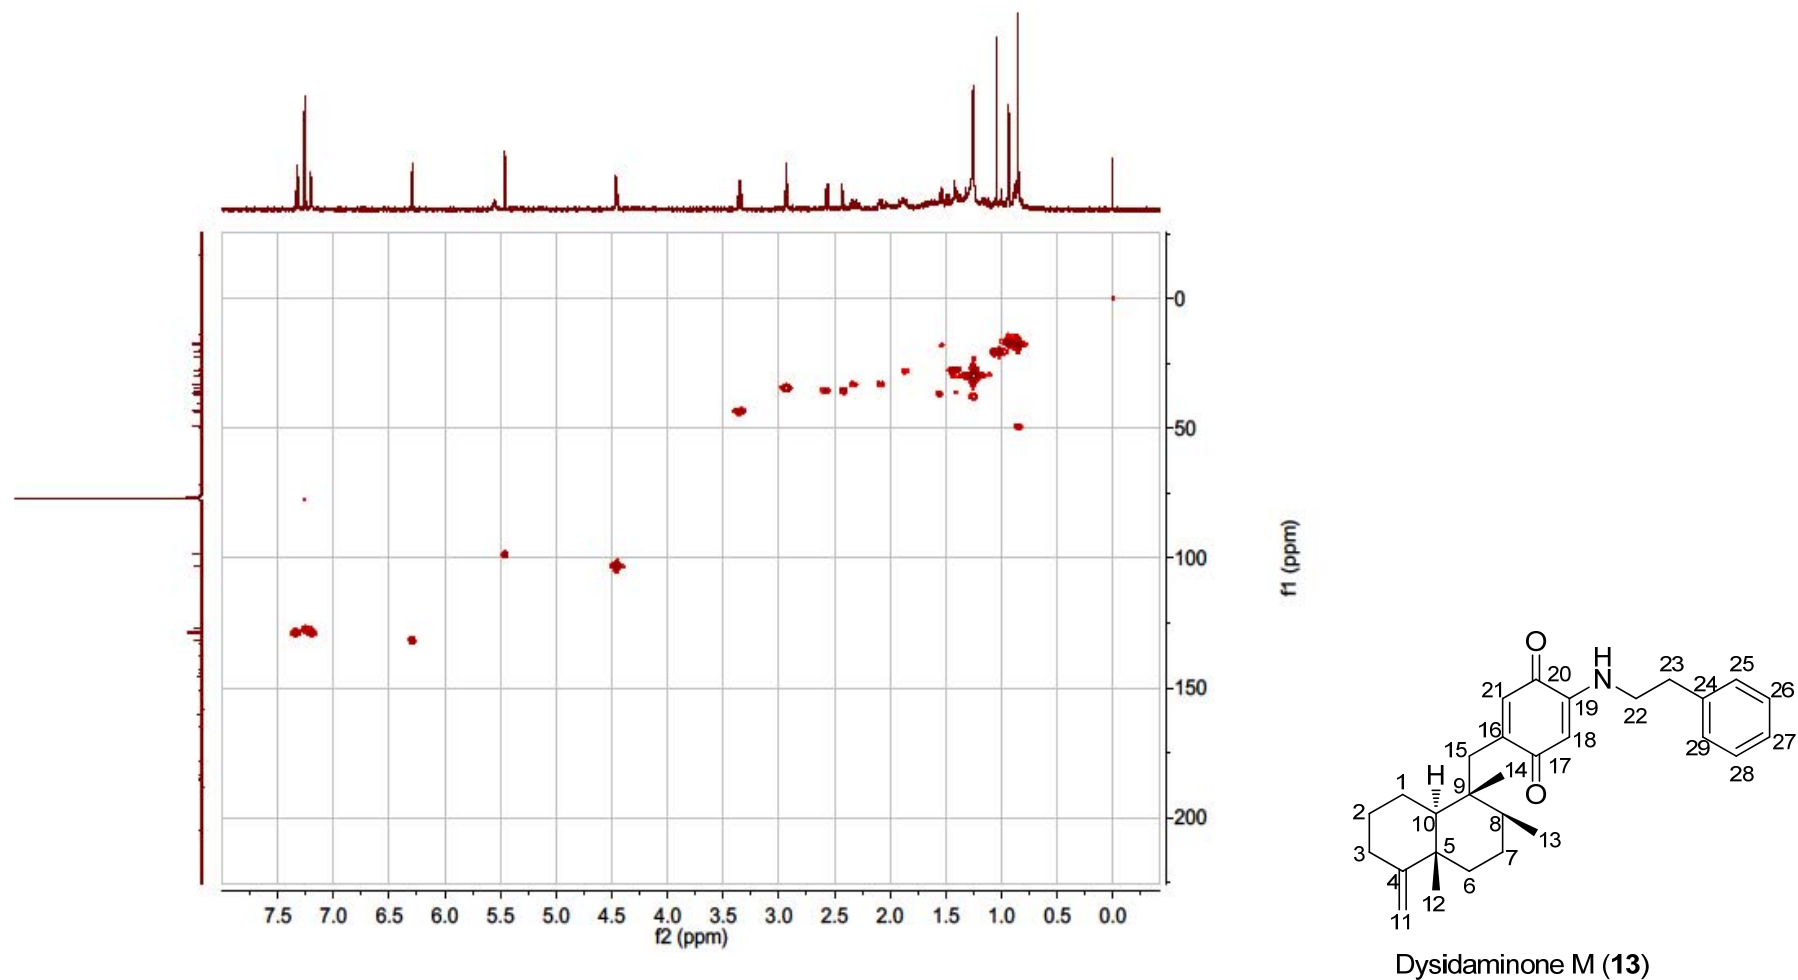

**Figure S121.** HSQC Spectrum of Dysidaminone M (13) in CDCl<sub>3</sub>.

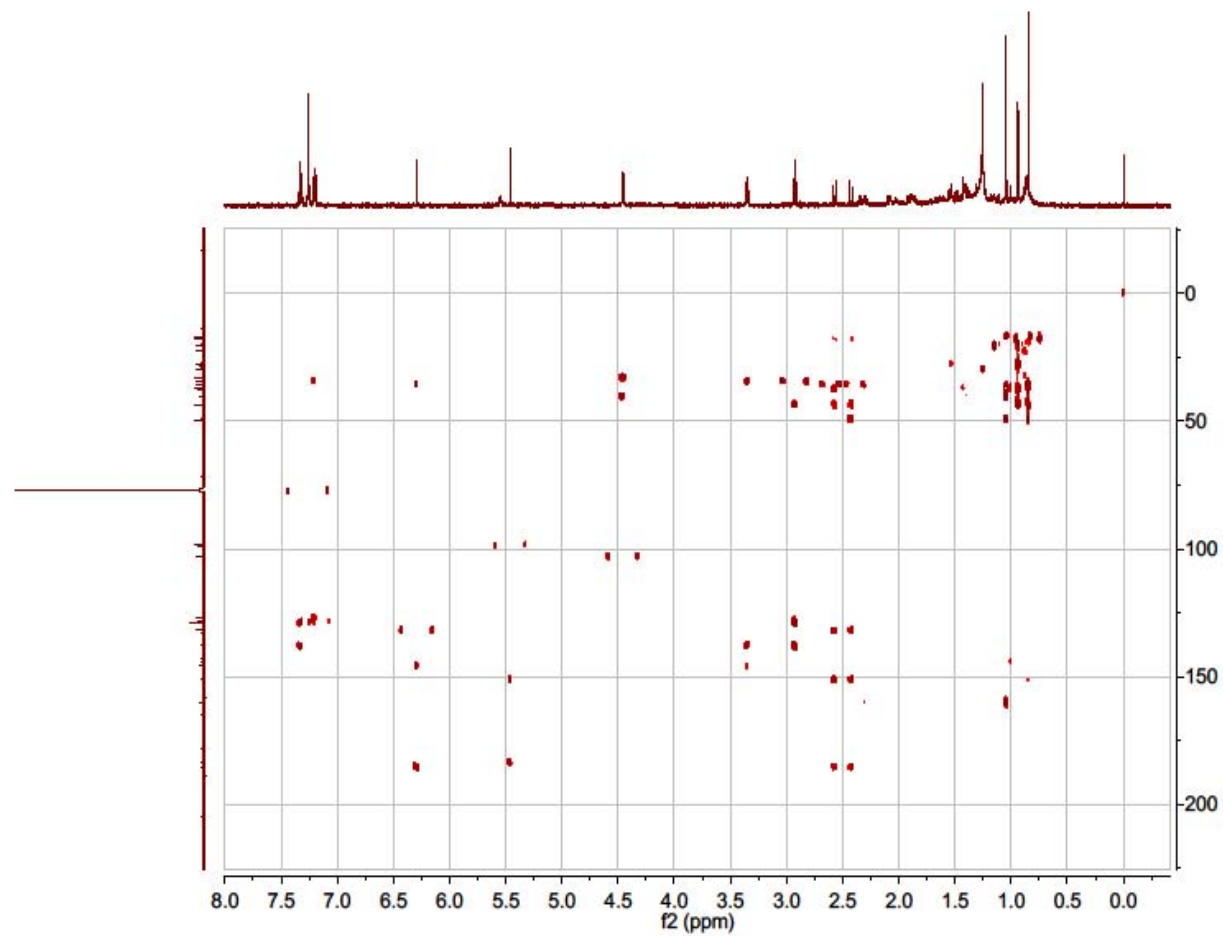

f1 (ppm)

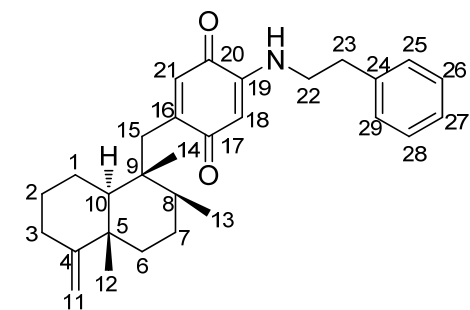

Dysidaminone M (**13**)

**Figure S122.** HMBC Spectrum of Dysidaminone M (**13**) in CDCl<sub>3</sub>.



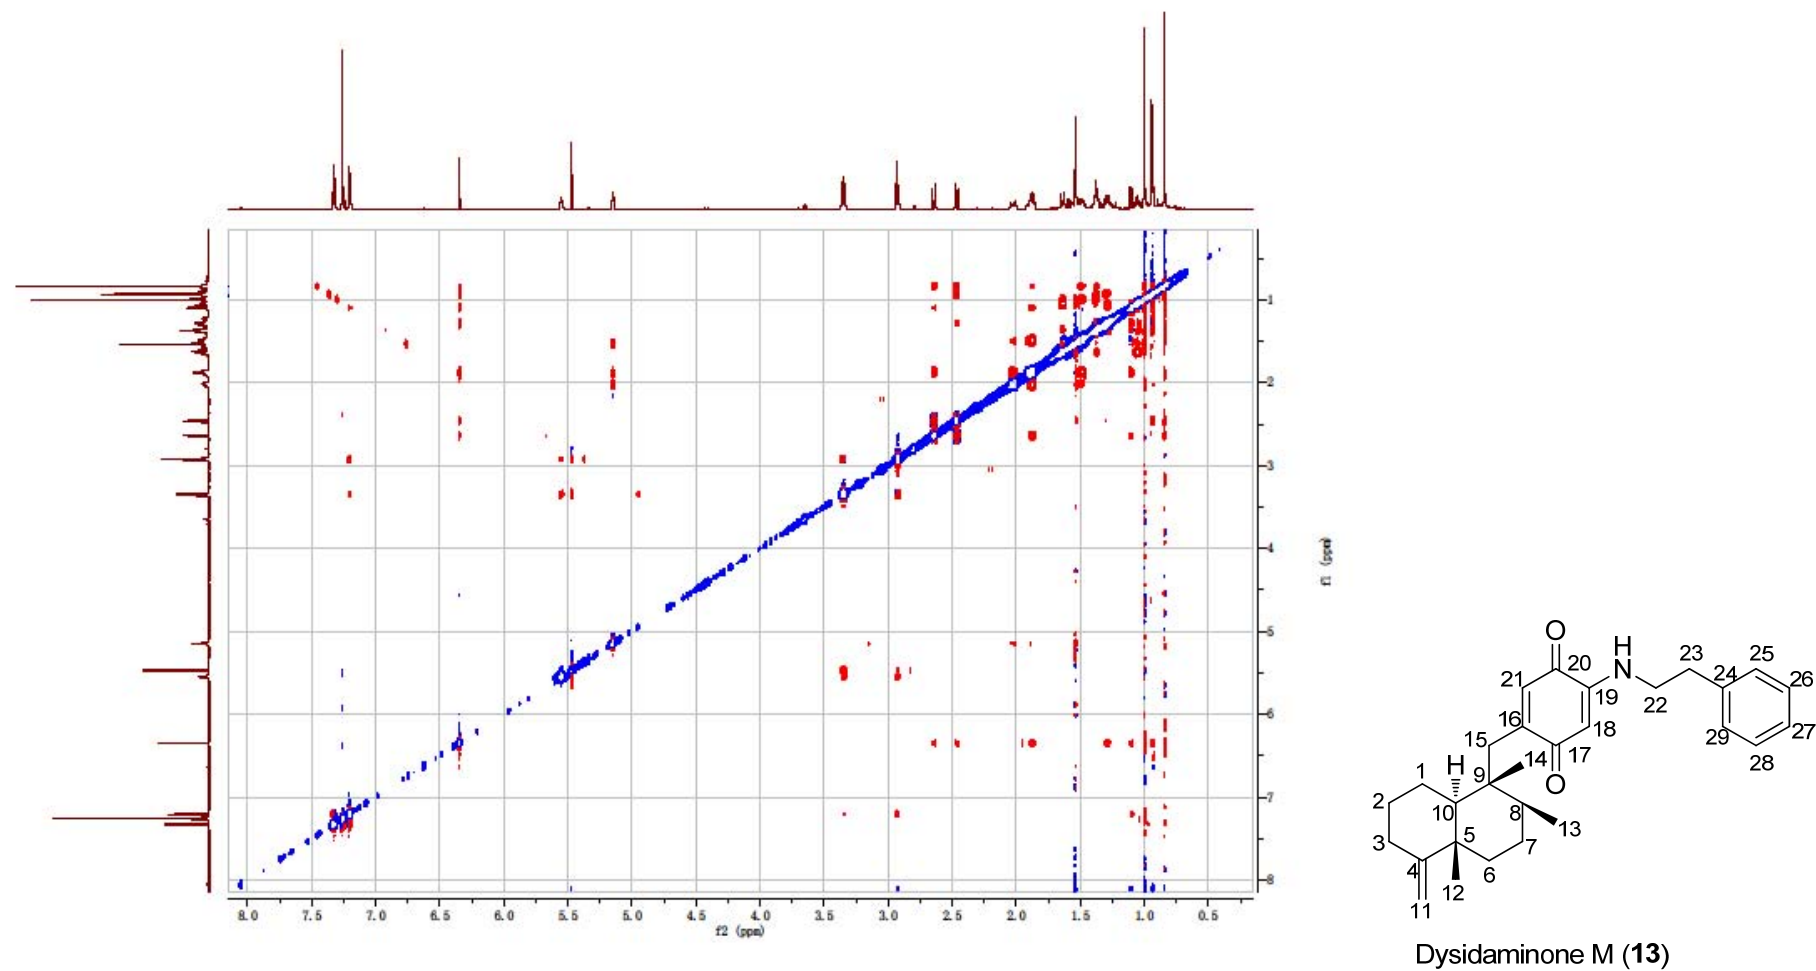

**Figure S123.** NOESY Spectrum of Dysidaminone M (13) in CDCl<sub>3</sub>.

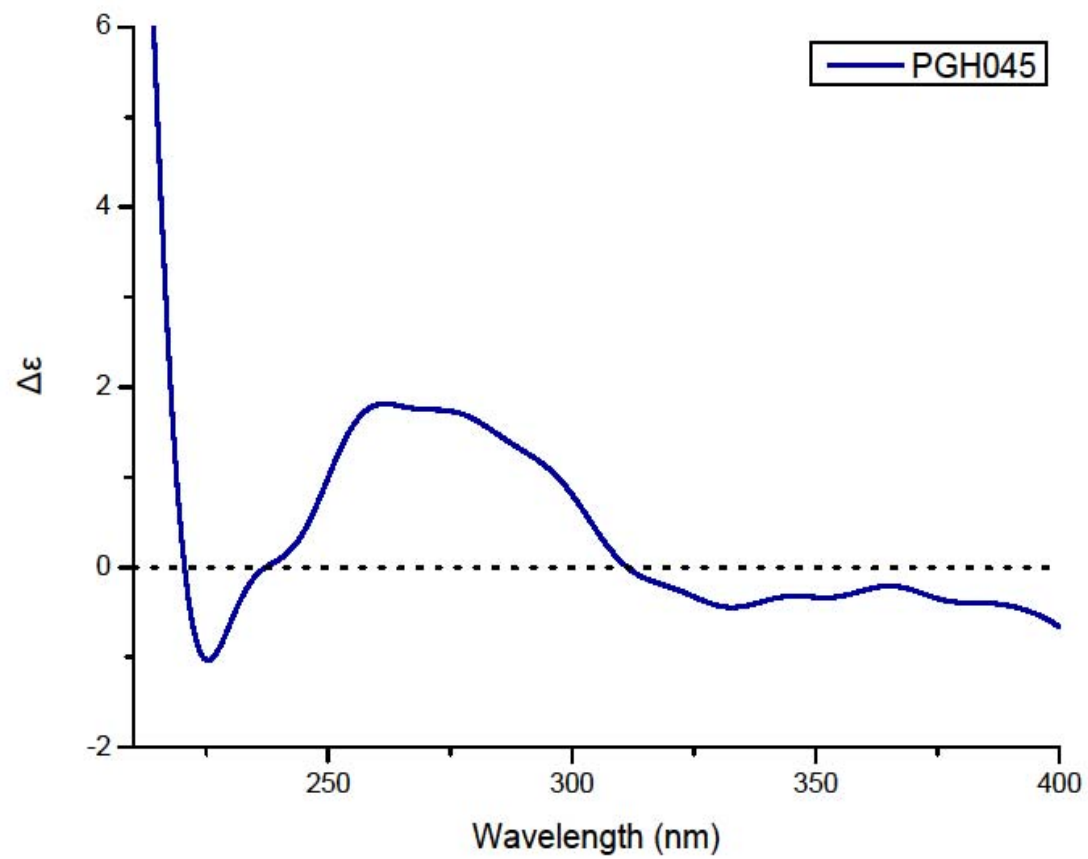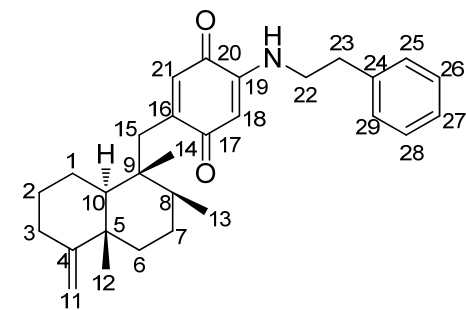

Dysidaminone M (**13**)

**Figure S124.** CD Spectrum of Dysidaminone M (**13**) in MeOH.
